# Supplementary material for: Diastereoselective synthesis of functionalized spiroindolines via intramolecular ipso-iodocyclization/nucleophile addition cascade reactions of indole-tethered ynones
Source: Royal Society of Chemistry journal article supplement (doi:10.1039/d4ob00112e), 2024-01-01
Supplement: d4ob00112e1.pdf [file d4ob00112e1.pdf]

## Supporting Information

### Diastereoselective Synthesis of Functionalized Spiroindolines via Intramolecular *ipso*-Iodocyclization/Nucleophile Addition Cascade Reactions of Indole-tethered Ynones

Debojyoti Bag<sup>a,b</sup>, and Sanghapal D. Sawant<sup>a,b,c\*</sup>

<sup>a</sup>*Natural Products and Medicinal Chemistry Division, CSIR-Indian Institute of Integrative Medicine, Canal Road, Jammu, Jammu & Kashmir, 180001, India.*

<sup>b</sup>*Academy of Scientific and Innovative Research (AcSIR), Ghaziabad-201002, India.*

<sup>c</sup>*Organic Chemistry Division, CSIR-National Chemical Laboratory, Dr. Homi Bhabha Road, Pune - 411008, India.*

Correspondence to: [sdsawant@iiim.res.in](mailto:sdsawant@iiim.res.in), [sdsawant@iiim.ac.in](mailto:sdsawant@iiim.ac.in), [sd.sawant@ncl.res.in](mailto:sd.sawant@ncl.res.in)

#### Table of Contents

| Contents                                                  | Page No. |
|-----------------------------------------------------------|----------|
| 1. General Methods.....                                   | S-2      |
| 2. Synthesis of Starting Materials.....                   | S-3      |
| 3. General Experimental Procedures.....                   | S-3      |
| 4. Characterization data for compounds <b>2a-3f</b> ..... | S-4      |
| 5. References.....                                        | S-18     |
| 6. NMR Spectra.....                                       | S-19     |

## 1. General Methods:

**Materials:** All glassware was oven-dried (90 °C). Unless mentioned, chemicals & solvents were purchased in high purity grade from commercial suppliers and used without further purification.

**Chromatography:** Thin layer chromatography (TLC) was carried out on Merck silica plates (60F– 254), and components were visualized by observation under UV light or by treating the plates with p-anisaldehyde followed by heating. Silica gel chromatography was performed using silica gel (60–120 or 100-200 mesh).

**Characterization:** NMR spectra for the characterization of compounds were recorded on Bruker Avance DPX FT-NMR 400 MHz instrument ( $^1\text{H}$ ) at 400 MHz and ( $^{13}\text{C}$ ) at 100 MHz respectively.  $^{19}\text{F}$  NMR was recorded at 376 MHz. Chemical shifts ( $\delta$ ) are reported in ppm, using the residual solvent peak in DMSO- $d_6$  ( $\delta_{\text{H}} = 2.50$  and  $\delta_{\text{C}} = 39.52$  ppm) as internal reference and coupling constants ( $J$ ) are given in hertz (Hz). The following abbreviations were used to explain the multiplicities: s = singlet, d = doublet, dd = doublet of doublet, ddd = doublet of doublets of doublets, t = triplet, q = quartet, m = multiplet. High-Resolution Mass Spectra (HRMS) were recorded using a Waters XEVO-G2-XS-Q-TOF mass spectrometer.

**Experimental details.** Unless mentioned, reactions were performed in an open atmosphere at room temperature (25-30 °C) in a 5 mL glass vial.

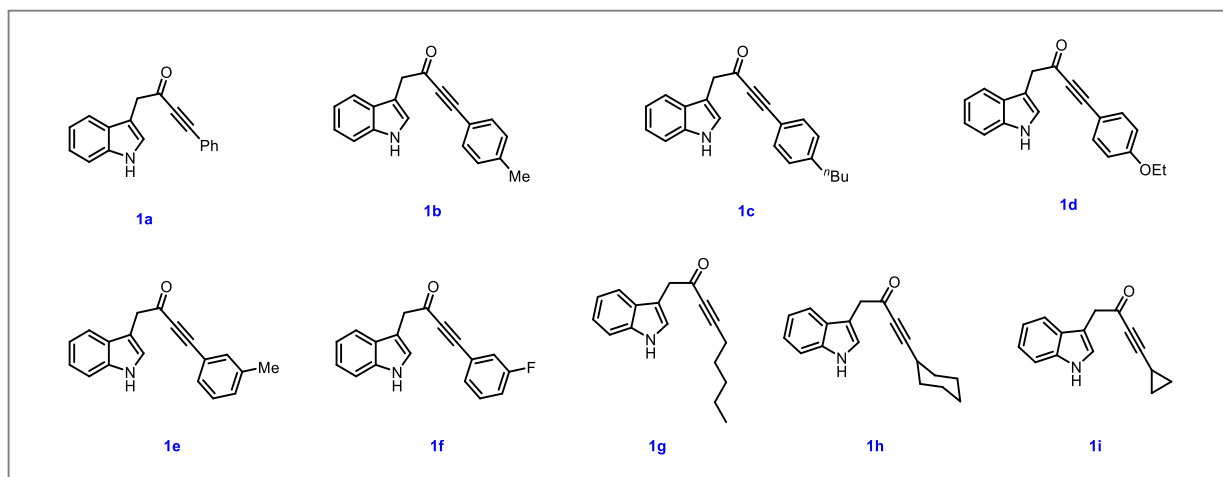

**Figure S1:** Indole-tethered ynones utilized in this study

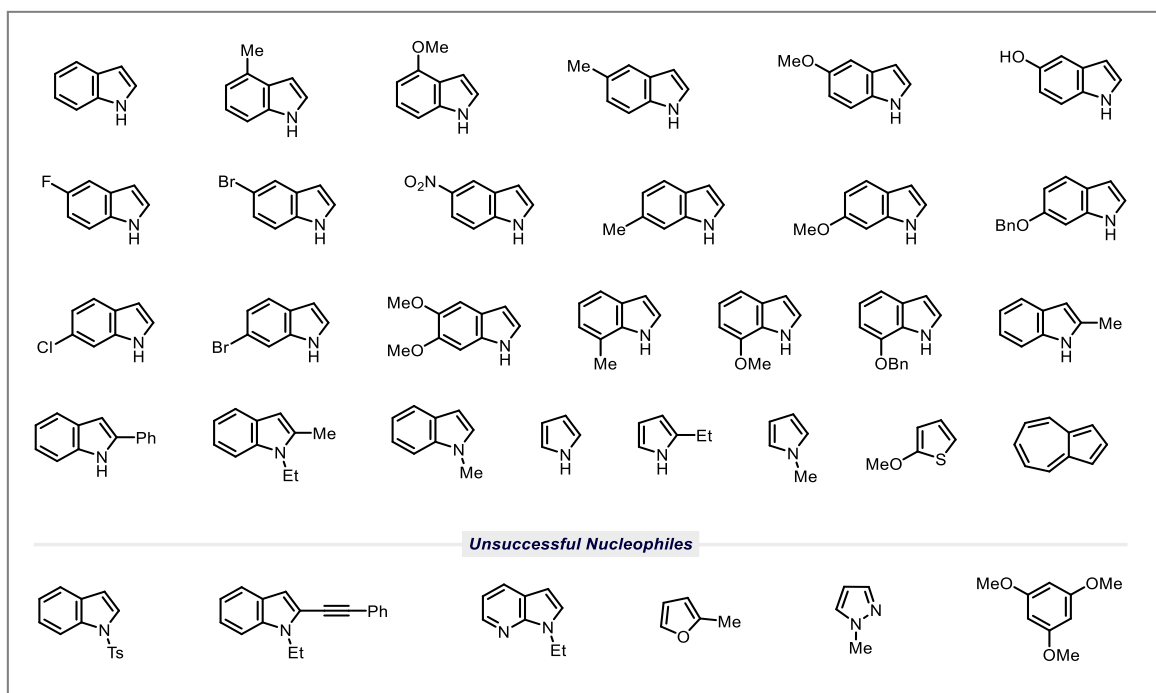

**Figure S2:** (Hetero)arene nucleophiles utilized in this study

## 2. Synthesis of Starting Materials:

Indole-tethered yrones utilized in this study were synthesized in two steps according to the previously reported literature procedures.<sup>1</sup>

## 3. General Experimental Procedure:

### Procedure for the Synthesis of Spiroindolines from Indole-tethered Yrones (GP1):

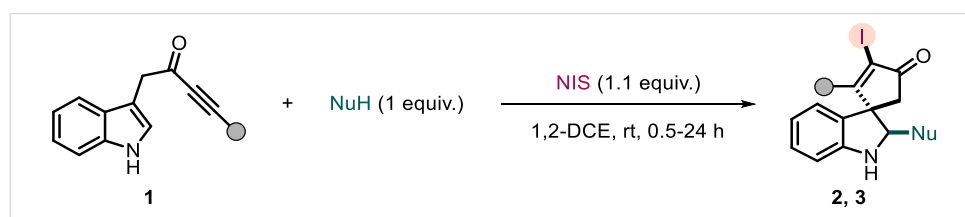

To the solution of indole-tethered ynone **1** (1.0 equiv.) and nucleophile (indole/pyrrole/thiophene/azulene) (1.0 equiv.) in 1,2-DCE (0.25 M) was added NIS (1.1 equiv.) The resulting mixture was stirred at room temperature. Progress of the reaction was monitored periodically by TLC. Upon completion, aqueous  $\text{Na}_2\text{S}_2\text{O}_3$  solution was added to the reaction mixture. The organic layer was separated and washed with brine. The combined organic layers were dried over anhydrous  $\text{Na}_2\text{SO}_4$  and concentrated under reduced pressure. Silica gel column purification by using ethyl acetate and petroleum ether mixture as eluent afforded the desired products.

#### 4. Characterization Data of Synthesized Compounds:

##### 2'-(1*H*-indol-3-yl)-3-iodo-2-phenylspiro[cyclopentane-1,3'-indolin]-2-en-4-one (2a):

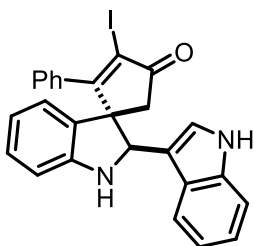

Reaction of ynone **1a** (75 mg, 0.289 mmol), indole (33.9 mg, 0.289 mmol) and NIS (71.6 mg, 0.318 mmol) following the GP1 afforded the title compound **2a** as pale yellow solid (131 mg, 90% yield); mp 112-114 °C;  $R_f$ : 0.46 (30% Ethyl Acetate-Petroleum Ether);  $^1\text{H}$  NMR (400 MHz, DMSO- $d_6$ )  $\delta$  11.2 (s, 1H), 7.48-7.42 (m, 3H), 7.40-7.35 (m, 1H), 7.28-7.19 (m, 4H), 7.14-7.04 (m, 3H), 6.92-6.86 (m, 1H), 6.73-6.68 (m, 1H), 6.58-6.54 (m, 1H), 6.15 (s, 1H), 5.21 (s, 1H), 2.74 (d,  $J$  = 18.79 Hz, 1H), 2.47 (d,  $J$  = 18.78 Hz, 1H) ppm;  $^{13}\text{C}\{^1\text{H}\}$  NMR (100 MHz, DMSO- $d_6$ )  $\delta$  201.9, 179.1, 151.4, 136.8, 135.9, 130.2, 129.4, 129.0, 128.3, 128.1, 125.9, 124.6, 123.4, 121.4, 119.7, 118.9, 117.8, 113.1, 111.8, 108.7, 105.1, 63.9, 63.0, 45.0 ppm; HRMS (ESI): calcd. for  $\text{C}_{26}\text{H}_{20}\text{N}_2\text{OI}$  [ $\text{M}+\text{H}$ ] $^+$ : 503.0620, found 503.0623.

##### 2'-(4-methyl-1*H*-indol-3-yl)-3-iodo-2-phenylspiro[cyclopentane-1,3'-indolin]-2-en-4-one (2b):

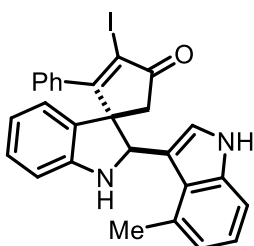

Reaction of ynone **1a** (75 mg, 0.289 mmol), 4-methylindole (38 mg, 0.289 mmol) and NIS (71.6 mg, 0.318 mmol) following the GP1 afforded the title compound **2b** as yellow solid (133 mg, 89% yield); mp 167-169 °C;  $R_f$ : 0.54 (30% Ethyl Acetate-Petroleum Ether);  $^1\text{H}$  NMR (400 MHz, DMSO- $d_6$ )  $\delta$  11.10 (d,  $J$  = 2.33 Hz, 1H), 7.40-7.32 (m, 3H), 7.25-7.21 (m, 1H), 7.10 (ddd,  $J$  = 15.22, 7.72, 1.21 Hz, 1H), 7.06-7.02 (m, 1H), 7.01-6.96 (m, 2H), 6.90-6.86 (m, 2H), 6.81-6.76 (m, 1H), 6.65 (dt,  $J$  = 7.39, 0.93 Hz, 1H), 6.51 (d,  $J$  = 7.58 Hz, 1H), 6.02 (s, 1H), 5.38 (s, 1H), 2.58 (s, 2H), 2.41 (s, 3H) ppm;  $^{13}\text{C}\{^1\text{H}\}$  NMR (100 MHz, DMSO- $d_6$ )  $\delta$  202.2, 180.8, 152.0, 136.8, 135.7, 129.3, 129.1, 128.5, 128.1, 127.7, 127.1, 125.0, 123.9, 123.6, 121.3, 121.1, 117.1, 115.7, 110.0, 107.5, 103.9, 64.3, 61.9, 44.4, 20.7 ppm; HRMS (ESI): calcd. for  $\text{C}_{27}\text{H}_{22}\text{N}_2\text{OI}$  [ $\text{M}+\text{H}$ ] $^+$ : 517.0777, found 517.0776.

##### 2'-(4-methoxy-1*H*-indol-3-yl)-3-iodo-2-phenylspiro[cyclopentane-1,3'-indolin]-2-en-4-one (2c):

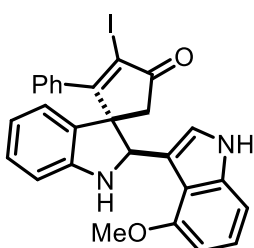

Reaction of ynone **1a** (75 mg, 0.289 mmol), 4-methoxyindole (42.5 mg, 0.289 mmol) and NIS (71.6 mg, 0.318 mmol) following the GP1 afforded the title compound **2c** as yellow solid (129 mg, 84% yield); mp 152-154 °C;  $R_f$ : 0.48 (30% Ethyl Acetate-Petroleum Ether);  $^1\text{H}$  NMR (400 MHz, DMSO- $d_6$ )  $\delta$  11.03 (d,  $J$  = 2.03 Hz, 1H), 7.38-7.30 (m, 3H), 7.08-6.96 (m, 4H), 6.90-6.82 (m, 3H), 6.61 (dt,  $J$  = 7.37, 0.90 Hz, 2H), 6.47 (d,  $J$  = 7.65 Hz, 1H), 6.46 (dd,  $J$  = 7.47, 0.90 Hz, 1H), 5.88 (s, 1H), 5.42 (s, 1H), 3.68 (s, 3H), 2.67 (d,  $J$  =

18.81 Hz, 1H), 2.53 (d,  $J = 18.80$  Hz, 1H) ppm;  $^{13}\text{C}\{^1\text{H}\}$  NMR (100 MHz, DMSO- $d_6$ )  $\delta$  202.3, 181.0, 153.3, 152.3, 138.0, 136.0, 129.1, 128.9, 128.0, 127.8, 127.1, 124.0, 122.4, 121.6, 116.9, 116.4, 115.2, 107.4, 105.3, 103.5, 99.2, 63.8, 62.4, 55.3, 43.5 ppm; HRMS (ESI): calcd. for  $\text{C}_{27}\text{H}_{22}\text{N}_2\text{O}_2\text{I}[\text{M}+\text{H}]^+$ : 533.0726, found 533.0729.

### 2'-(5-methyl-1*H*-indol-3-yl)-3-iodo-2-phenylspiro[cyclopentane-1,3'-indolin]-2-en-4-one

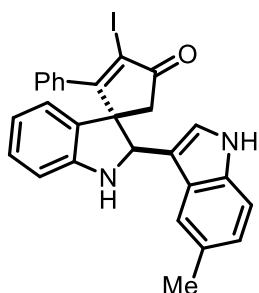

**(2d):** Reaction of ynone **1a** (75 mg, 0.289 mmol), 5-methylindole (38 mg, 0.289 mmol) and NIS (71.6 mg, 0.318 mmol) following the GP1 afforded the title compound **2d** as yellow solid (136 mg, 91% yield); mp 84-87 °C;  $R_f$ : 0.55 (30% Ethyl Acetate-Petroleum Ether);  $^1\text{H}$  NMR (400 MHz, DMSO- $d_6$ )  $\delta$  10.99 (s, 1H), 7.50-7.41 (m, 3H), 7.33-7.23 (m, 3H), 7.22-7.19 (m, 1H), 7.15-7.05 (m, 2H), 7.00 (s, 1H), 6.92-6.87 (m, 1H), 6.74-6.68 (m, 1H), 6.59 (d,  $J = 7.75$  Hz, 1H), 6.16 (s, 1H), 5.25-5.20 (m, 1H), 2.78 (d,  $J = 18.43$  Hz, 1H), 2.42 (d,  $J = 18.31$  Hz, 1H), 2.27 (s, 3H) ppm;  $^{13}\text{C}\{^1\text{H}\}$  NMR (100 MHz, DMSO- $d_6$ )  $\delta$  201.9, 178.5, 151.2, 135.9, 135.1, 130.7, 129.5, 128.9, 128.4, 127.2, 126.3, 124.6, 123.3, 123.0, 119.3, 117.9, 112.2, 111.5, 108.9, 105.4, 64.0, 63.1, 45.1, 21.4 ppm; HRMS (ESI): calcd. for  $\text{C}_{27}\text{H}_{20}\text{N}_2\text{OI}[\text{M}-\text{H}]^-$ : 515.0620, found 515.0621.

### 2'-(5-methoxy-1*H*-indol-3-yl)-3-iodo-2-phenylspiro[cyclopentane-1,3'-indolin]-2-en-4-one

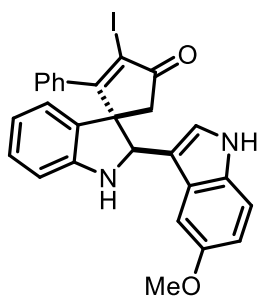

**one (2e):** Reaction of ynone **1a** (75 mg, 0.289 mmol), 5-methoxyindole (42.5 mg, 0.289 mmol) and NIS (71.6 mg, 0.318 mmol) following the GP1 afforded the title compound **2e** as off white solid (137 mg, 89% yield); mp 160-162 °C;  $R_f$ : 0.44 (30% Ethyl Acetate-Petroleum Ether);  $^1\text{H}$  NMR (400 MHz, DMSO- $d_6$ )  $\delta$  10.94 (s, 1H), 7.44-7.39 (m, 3H), 7.28-7.23 (m, 2H), 7.21-7.16 (m, 2H), 7.08-7.03 (m, 2H), 6.73-6.67 (m, 2H), 6.56-6.51 (m, 2H), 6.06 (bs, 1H), 5.16 (s, 1H), 3.51 (s, 3H), 2.73 (d,  $J = 18.52$  Hz, 1H), 2.53 (d,  $J = 18.50$  Hz, 1H) ppm;  $^{13}\text{C}\{^1\text{H}\}$  NMR (100 MHz, DMSO- $d_6$ )  $\delta$  202.0, 179.6, 153.1, 151.6, 135.9, 131.9, 130.1, 129.3, 129.1, 128.3, 127.9, 125.9, 125.3, 123.2, 117.7, 113.6, 112.5, 111.6, 108.5, 104.8, 101.3, 63.6, 63.2, 55.1, 44.8 ppm; HRMS (ESI): calcd. for  $\text{C}_{27}\text{H}_{20}\text{N}_2\text{O}_2\text{I}[\text{M}-\text{H}]^-$ : 531.0569, found 531.0564.

**2'-(5-hydroxy-1*H*-indol-3-yl)-3-iodo-2-phenylspiro[cyclopentane-1,3'-indolin]-2-en-4-**

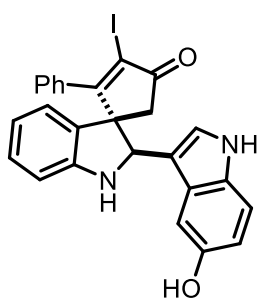

**one (2f):** Reaction of ynone **1a** (75 mg, 0.289 mmol), 5-hydroxyindole (38.5 mg, 0.289 mmol) and NIS (71.6 mg, 0.318 mmol) following the GP1 afforded the title compound **2f** as light brown solid (130 mg, 87% yield); mp 177-179 °C;  $R_f$ : 0.22 (30% Ethyl Acetate-Petroleum Ether);  $^1\text{H}$  NMR (400 MHz, DMSO- $d_6$ )  $\delta$  10.80 (d,  $J = 2.20$  Hz, 1H), 8.67 (s, 1H), 7.45-7.40 (m, 3H), 7.25-7.20 (m, 2H), 7.15 (d,  $J = 8.65$  Hz, 1H), 7.11-7.05 (m, 3H), 6.74 (d,  $J = 2.23$  Hz, 1H), 6.69 (dt,  $J = 7.41, 0.78$  Hz, 1H), 6.60 (dd,  $J = 8.65, 2.29$  Hz, 1H), 6.57-6.57 (m, 1H), 6.10 (d,  $J = 2.38$  Hz, 1H), 5.10 (d,  $J = 2.34$  Hz, 1H), 2.80 (d,  $J = 18.40$  Hz, 1H), 2.40 (d,  $J = 18.39$  Hz, 1H) ppm;  $^{13}\text{C}\{^1\text{H}\}$  NMR (100 MHz, DMSO- $d_6$ )  $\delta$  202.1, 179.1, 151.3, 150.5, 136.1, 131.3, 130.3, 129.4, 129.0, 128.5, 128.3, 127.0, 124.8, 123.5, 117.8, 112.2, 111.9, 111.6, 108.9, 105.2, 104.1, 64.4, 63.2, 45.3 ppm; HRMS (ESI): calcd. for  $\text{C}_{26}\text{H}_{18}\text{N}_2\text{O}_2\text{I}[\text{M}-\text{H}]^-$ : 517.0413, found 517.0406.

**2'-(5-fluoro-1*H*-indol-3-yl)-3-iodo-2-phenylspiro[cyclopentane-1,3'-indolin]-2-en-4-one**

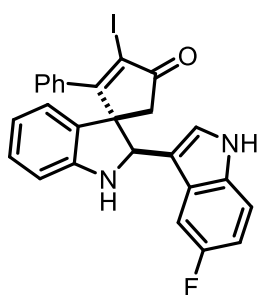

**(2g):** Reaction of ynone **1a** (75 mg, 0.289 mmol), 5-fluoroindole (39 mg, 0.289 mmol) and NIS (71.6 mg, 0.318 mmol) following the GP1 afforded the title compound **2g** as off white solid (102 mg, 68% yield); mp 155-157 °C;  $R_f$ : 0.37 (30% Ethyl Acetate-Petroleum Ether);  $^1\text{H}$  NMR (400 MHz, DMSO- $d_6$ )  $\delta$  11.23 (d,  $J = 2.18$  Hz, 1H), 7.45-7.41 (m, 3H), 7.39-7.34 (m, 2H), 7.23-7.19 (m, 2H), 7.14-7.09 (m, 2H), 6.92 (dt,  $J = 9.11, 2.55$  Hz, 1H), 6.84 (dd,  $J = 10.42, 2.54$  Hz, 1H), 6.72 (dt,  $J = 7.41, 0.91$  Hz, 1H), 6.58-6.54 (m, 1H), 6.14 (d,  $J = 2.01$  Hz, 1H), 5.16 (d,  $J = 1.96$  Hz, 1H), 2.68 (d,  $J = 18.40$  Hz, 1H), 2.50 (d,  $J = 18.42$  Hz, 1H) ppm;  $^{13}\text{C}\{^1\text{H}\}$  NMR (100 MHz, DMSO- $d_6$ )  $\delta$  201.7, 179.0, 156.6 (d,  $J = 231.3$  Hz), 151.3, 135.9, 133.4, 130.0, 129.3, 129.1, 128.3, 128.0, 126.7, 125.9 (d,  $J = 10.03$  Hz), 123.4, 117.9, 113.3 (d,  $J = 4.64$  Hz), 112.8 (d,  $J = 9.86$  Hz), 109.5 (d,  $J = 26.06$  Hz), 108.7, 105.2, 104.4 (d,  $J = 23.89$  Hz), 63.8, 63.0, 44.7 ppm;  $^{19}\text{F}$  NMR (376 MHz, DMSO- $d_6$ )  $\delta$  -124.5 ppm; HRMS (ESI): calcd. for  $\text{C}_{26}\text{H}_{17}\text{N}_2\text{OIF}[\text{M}-\text{H}]^-$ : 519.0370, found 519.0369.

### 2'-(5-bromo-1*H*-indol-3-yl)-3-iodo-2-phenylspiro[cyclopentane-1,3'-indolin]-2-en-4-one

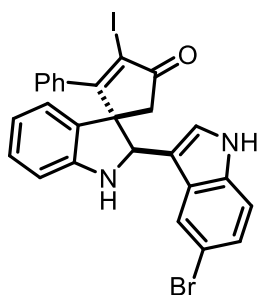

(**2h**): Reaction of ynone **1a** (75 mg, 0.289 mmol), 5-bromoindole (56.7 mg, 0.289 mmol) and NIS (71.6 mg, 0.318 mmol) following the GP1 afforded the title compound **2h** as yellow solid (145 mg, 86% yield); mp 178-180 °C;  $R_f$ : 0.35 (30% Ethyl Acetate-Petroleum Ether);  $^1\text{H}$  NMR (400 MHz, DMSO- $d_6$ )  $\delta$  11.35 (d,  $J = 2.13$  Hz, 1H), 7.47-7.42 (m, 3H), 7.38-7.31 (m, 3H), 7.29-7.24 (m, 2H), 7.18 (dd,  $J = 8.62, 1.93$  Hz, 1H), 7.14-7.08 (m, 2H), 6.73 (dt,  $J = 7.42, 0.88$  Hz, 1H), 6.60 (d,  $J = 7.73$  Hz, 1H), 6.20 (d,  $J = 2.44$  Hz, 1H), 5.18 (d,  $J = 2.35$  Hz, 1H), 2.68 (d,  $J = 18.34$  Hz, 1H), 2.44 (d,  $J = 18.32$  Hz, 1H) ppm;  $^{13}\text{C}\{^1\text{H}\}$  NMR (100 MHz, DMSO- $d_6$ )  $\delta$  201.7, 178.4, 151.1, 135.8, 135.4, 130.4, 129.5, 129.1, 128.4, 128.3, 127.8, 126.2, 123.9, 123.4, 122.0, 118.2, 113.9, 112.5, 111.6, 109.1, 105.5, 64.0, 62.9, 44.9 ppm; HRMS (ESI): calcd. for  $\text{C}_{26}\text{H}_{17}\text{N}_2\text{OBrI}$  [M-H] $^-$ : 578.9569, found 578.9561.

### 3-iodo-2'-(5-nitro-1*H*-indol-3-yl)-2-phenylspiro[cyclopentane-1,3'-indolin]-2-en-4-one

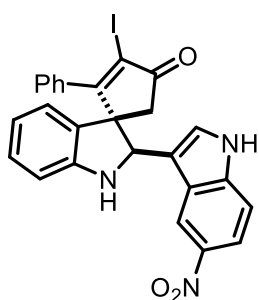

(**2i**): Reaction of ynone **1a** (75 mg, 0.289 mmol), 5-nitroindole (46.8 mg, 0.289 mmol) and NIS (71.6 mg, 0.318 mmol) following the GP1 afforded the title compound **2i** as pale brown solid (104 mg, 66% yield); mp 165-167 °C;  $R_f$ : 0.25 (30% Ethyl Acetate-Petroleum Ether);  $^1\text{H}$  NMR (400 MHz, DMSO- $d_6$ )  $\delta$  11.88 (s, 1H), 8.26 (s, 1H), 8.04-7.93 (m, 1H), 7.61-7.52 (m, 2H), 7.51-7.41 (m, 3H), 7.37-7.29 (m, 2H), 7.18-7.08 (m, 2H), 6.80-6.66 (m, 2H), 6.30 (s, 1H), 5.627 (d,  $J = 2.30$  Hz, 1H), 2.64 (d,  $J = 18.26$  Hz, 1H), 2.45 (d,  $J = 18.30$  Hz, 1H) ppm;  $^{13}\text{C}\{^1\text{H}\}$  NMR (100 MHz, DMSO- $d_6$ )  $\delta$  201.4, 178.0, 150.9, 140.5, 139.8, 135.7, 130.4, 129.5, 129.1, 128.5, 128.3, 125.2, 123.5, 118.4, 116.8, 115.5, 112.4, 109.3, 105.7, 63.9, 62.6, 45.0 ppm; HRMS (ESI): calcd. for  $\text{C}_{26}\text{H}_{17}\text{N}_3\text{O}_3\text{I}$  [M-H] $^-$ : 546.0315, found 546.0316.

### 3-iodo-2'-(6-methyl-1*H*-indol-3-yl)-2-phenylspiro[cyclopentane-1,3'-indolin]-2-en-4-one

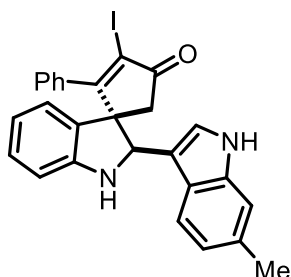

(**2j**): Reaction of ynone **1a** (75 mg, 0.289 mmol), 6-methylindole (38 mg, 0.289 mmol) and NIS (71.6 mg, 0.318 mmol) following the GP1 afforded the title compound **2j** as off white solid (126 mg, 84% yield); mp 118-120 °C;  $R_f$ : 0.51 (30% Ethyl Acetate-Petroleum Ether);  $^1\text{H}$  NMR (400 MHz, DMSO- $d_6$ )  $\delta$  10.94 (d,  $J = 1.96$  Hz, 1H), 7.47-7.39 (m, 3H), 7.25-7.20 (m, 2H), 7.17-7.13 (m, 2H), 7.12-7.05 (m, 3H), 6.75-6.67 (m, 2H), 6.55 (d,

$J = 7.69$  Hz, 1H), 6.12 (s, 1H), 5.17 (d,  $J = 0.89$  Hz, 1H), 2.73 (d,  $J = 18.45$  Hz, 1H), 2.42 (d,  $J = 18.43$  Hz, 1H), 2.35 (s, 3H) ppm;  $^{13}\text{C}\{^1\text{H}\}$  NMR (100 MHz, DMSO- $d_6$ )  $\delta$  202.0, 179.0, 151.4, 137.2, 136.0, 130.5, 130.3, 129.4, 129.0, 128.4, 128.2, 123.9, 123.8, 123.4, 120.7, 119.4, 117.8, 112.9, 111.6, 108.8, 105.2, 64.0, 63.1, 45.1, 21.4 ppm; HRMS (ESI): calcd. for  $\text{C}_{27}\text{H}_{22}\text{N}_2\text{OI}[\text{M}+\text{H}]^+$ : 517.0777, found 517.0776.

**3-iodo-2'-(6-(methoxy)-1H-indol-3-yl)-2-phenylspiro[cyclopentane-1,3'-indolin]-2-en-4-**

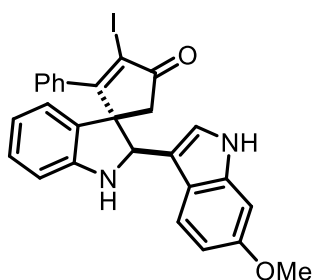

**one (2k):** Reaction of ynone **1a** (75 mg, 0.289 mmol), 6-methoxyindole (42.5 mg, 0.289 mmol) and NIS (71.6 mg, 0.318 mmol) following the GP1 afforded the title compound **2k** as off white solid (128 mg, 83% yield); mp 175-177 °C;  $R_f$ : 0.35 (30% Ethyl Acetate-Petroleum Ether);  $^1\text{H}$  NMR (400 MHz, DMSO- $d_6$ )  $\delta$  10.89 (d,  $J = 2.01$  Hz, 1H), 7.46-7.40 (m, 3H), 7.24-7.19 (m, 2H),

7.12-7.05 (m, 4H), 6.86 (d,  $J = 2.24$  Hz, 1H), 6.69 (dt,  $J = 7.41, 0.92$  Hz, 1H), 6.58-6.52 (m, 2H), 6.11 (d,  $J = 2.14$  Hz, 1H), 5.14 (d,  $J = 2.02$  Hz, 1H), 3.73 (s, 3H), 2.72 (d,  $J = 18.44$  Hz, 1H), 2.43 (d,  $J = 18.42$  Hz, 1H) ppm;  $^{13}\text{C}\{^1\text{H}\}$  NMR (100 MHz, DMSO- $d_6$ )  $\delta$  201.9, 179.1, 155.6, 151.3, 137.6, 135.9, 130.1, 129.3, 129.0, 128.3, 128.1, 123.3, 123.1, 120.3, 120.2, 117.7, 113.1, 109.1, 108.7, 105.1, 94.7, 63.9, 63.1, 55.1, 45.0 ppm; HRMS (ESI): calcd. for  $\text{C}_{27}\text{H}_{22}\text{N}_2\text{O}_2\text{I}[\text{M}+\text{H}]^+$ : 533.0726, found 533.0731.

**2'-(6-(benzyloxy)-1H-indol-3-yl)-3-iodo-2-phenylspiro[cyclopentane-1,3'-indolin]-2-en-4-**

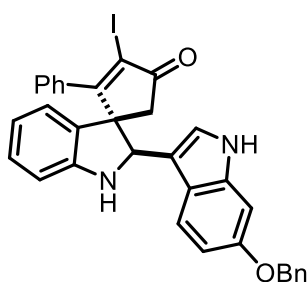

**one (2l):** Reaction of ynone **1a** (75 mg, 0.289 mmol), 6-benzyloxyindole (64.5 mg, 0.289 mmol) and NIS (71.6 mg, 0.318 mmol) following the GP1 afforded the title compound **2l** as pale brown solid (162 mg, 92% yield); mp 117-119 °C;  $R_f$ : 0.44 (30% Ethyl Acetate-Petroleum Ether);  $^1\text{H}$  NMR (400 MHz, DMSO- $d_6$ )  $\delta$  10.92 (d,  $J = 2.11$  Hz, 1H), 7.48-7.37 (m, 7H), 7.34-7.31 (m, 1H),

7.24-7.20 (m, 2H), 7.13-7.06 (m, 4H), 6.95 (d,  $J = 2.23$  Hz, 1H), 6.70 (dt,  $J = 7.41, 0.92$  Hz, 1H), 6.65 (dd,  $J = 8.68, 2.25$  Hz, 1H), 6.55 (d,  $J = 7.70$  Hz, 1H), 6.13 (d,  $J = 2.14$  Hz, 1H), 5.16 (d,  $J = 2.02$  Hz, 1H), 5.09 (s, 2H), 2.74 (d,  $J = 18.43$  Hz, 1H), 2.45 (d,  $J = 18.41$  Hz, 1H) ppm;  $^{13}\text{C}\{^1\text{H}\}$  NMR (100 MHz, DMSO- $d_6$ )  $\delta$  201.9, 179.0, 154.6, 151.3, 137.5, 137.4, 135.9, 130.1, 129.3, 129.0, 128.4, 128.3, 128.1, 127.7, 127.5, 123.3 (2), 120.4 (2), 117.7, 113.0, 109.7, 108.6, 105.1, 96.1, 69.4, 63.9, 63.1, 45.0 ppm; HRMS (ESI): calcd. for  $\text{C}_{33}\text{H}_{24}\text{N}_2\text{O}_2\text{I}[\text{M}+\text{H}]^+$ : 607.0882, found 607.0890.



### 2'-(6-chloro-1*H*-indol-3-yl)-3-iodo-2-phenylspiro[cyclopentane-1,3'-indolin]-2-en-4-one

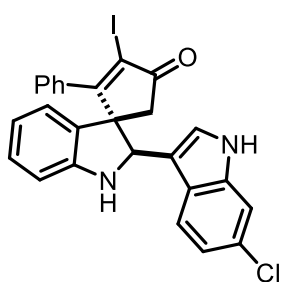

**(2m):** Reaction of ynone **1a** (75 mg, 0.289 mmol), 6-chloroindole (43.8 mg, 0.289 mmol) and NIS (71.6 mg, 0.318 mmol) following the GP1 afforded the title compound **2m** as off white solid (122 mg, 79% yield); mp 90-93 °C;  $R_f$ : 0.52 (30% Ethyl Acetate-Petroleum Ether);  $^1\text{H}$  NMR (400 MHz, DMSO- $d_6$ )  $\delta$  11.26 (d,  $J = 1.77$  Hz, 1H), 7.46-7.40 (m, 4H), 7.32-7.29 (m, 1H), 7.25-7.20 (m, 3H), 7.12-7.06 (m, 2H), 6.95-6.90 (m, 1H), 6.71 (dt,  $J = 7.40, 0.78$  Hz, 1H), 6.56 (d,  $J = 7.61$  Hz, 1H), 6.18 (s, 1H), 5.18 (d,  $J = 1.69$  Hz, 1H), 2.67 (d,  $J = 18.29$  Hz, 1H), 2.43 (d,  $J = 18.33$  Hz, 1H) ppm;  $^{13}\text{C}\{^1\text{H}\}$  NMR (100 MHz, DMSO- $d_6$ )  $\delta$  201.7, 178.7, 151.2, 137.1, 135.9, 130.1, 129.4, 129.0, 128.4, 128.1, 126.1, 125.7, 124.8, 123.4, 121.1, 119.2, 117.9, 113.2, 111.4, 108.8, 105.4, 63.9, 62.8, 44.9 ppm; HRMS (ESI): calcd. for  $\text{C}_{26}\text{H}_{19}\text{N}_2\text{OClI}$   $[\text{M}+\text{H}]^+$ : 537.0231, found 537.0234.

### 2'-(6-bromo-1*H*-indol-3-yl)-3-iodo-2-phenylspiro[cyclopentane-1,3'-indolin]-2-en-4-one

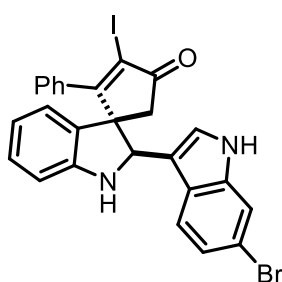

**(2n):** Reaction of ynone **1a** (75 mg, 0.289 mmol), 6-bromoindole (56.7 mg, 0.289 mmol) and NIS (71.6 mg, 0.318 mmol) following the GP1 afforded the title compound **2n** as off white solid (122 mg, 72% yield); mp 129-132 °C;  $R_f$ : 0.52 (30% Ethyl Acetate-Petroleum Ether);  $^1\text{H}$  NMR (400 MHz, DMSO- $d_6$ )  $\delta$  11.26 (d,  $J = 2.21$  Hz, 1H), 7.57 (d,  $J = 1.56$  Hz, 1H), 7.45-7.40 (m, 3H), 7.29 (d,  $J = 2.45$  Hz, 1H), 7.26-7.22 (m, 2H), 7.21-7.18 (m, 1H), 7.13-7.06 (m, 2H), 7.05-7.02 (m, 1H), 6.71 (dt,  $J = 7.42, 0.94$  Hz, 1H), 6.57 (d,  $J = 7.68$  Hz, 1H), 6.18 (d,  $J = 2.19$  Hz, 1H), 5.19 (d,  $J = 2.01$  Hz, 1H), 2.67 (d,  $J = 18.36$  Hz, 1H), 2.45 (d,  $J = 18.34$  Hz, 1H) ppm;  $^{13}\text{C}\{^1\text{H}\}$  NMR (100 MHz, DMSO- $d_6$ )  $\delta$  201.7, 178.7, 151.2, 137.6, 135.9, 130.1, 129.4, 129.1, 128.4, 128.2, 125.7, 125.1, 123.5, 121.8, 121.5, 118.0, 114.4, 114.2, 113.2, 108.9, 105.4, 64.0, 62.8, 45.0 ppm; HRMS (ESI): calcd. for  $\text{C}_{26}\text{H}_{19}\text{N}_2\text{OBrI}$   $[\text{M}+\text{H}]^+$ : 580.9725, found 580.9711.

### 2'-(5,6-dimethoxy-1*H*-indol-3-yl)-3-iodo-2-phenylspiro[cyclopentane-1,3'-indolin]-2-en-4-one

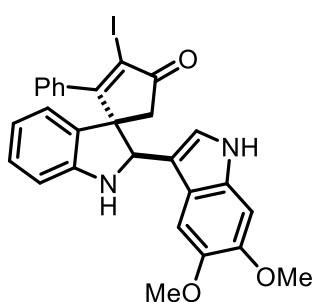

**(2o):** Reaction of ynone **1a** (75 mg, 0.289 mmol), 5,6-dimethoxyindole (51.2 mg, 0.289 mmol) and NIS (71.6 mg, 0.318 mmol) following the GP1 afforded the title compound **2o** as light brown solid (153 mg, 94% yield); mp 167-169 °C;  $R_f$ : 0.17 (30% Ethyl Acetate-Petroleum Ether);  $^1\text{H}$  NMR (400 MHz, DMSO- $d_6$ )  $\delta$  10.78 (d,  $J = 2.06$  Hz, 1H), 7.45-7.38 (m, 3H), 7.20-7.16 (m, 2H),

7.13-7.07 (m, 3H), 6.88 (s, 1H), 6.69 (dt,  $J = 7.40, 0.78$  Hz, 1H), 6.53 (d,  $J = 7.63$  Hz, 1H), 6.49 (s, 1H), 6.06 (d,  $J = 1.55$  Hz, 1H), 5.13 (d,  $J = 1.57$  Hz, 1H), 3.73 (s, 3H), 3.48 (s, 3H), 2.72 (d,  $J = 18.55$  Hz, 1H), 2.53 (d,  $J = 18.50$  Hz, 1H) ppm;  $^{13}\text{C}\{^1\text{H}\}$  NMR (100 MHz, DMSO- $d_6$ )  $\delta$  202.0, 179.6, 151.7, 146.4, 144.2, 135.9, 131.2, 130.0, 129.3, 129.0, 128.2, 127.9, 123.2, 122.8, 118.2, 117.6, 113.8, 108.5, 104.8, 102.0, 95.3, 63.5, 63.3, 55.6, 55.6, 44.6 ppm; HRMS (ESI): calcd. for  $\text{C}_{28}\text{H}_{24}\text{N}_2\text{O}_3\text{I}$   $[\text{M}+\text{H}]^+$ : 563.0832, found 563.0828.

**2'-(7-methyl-1*H*-indol-3-yl)-3-iodo-2-phenylspiro[cyclopentane-1,3'-indolin]-2-en-4-one**

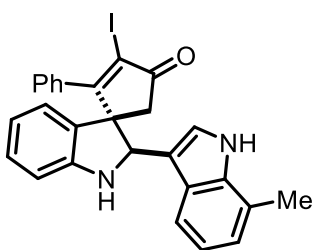

**(2p):** Reaction of ynone **1a** (75 mg, 0.289 mmol), 7-methylindole (38 mg, 0.289 mmol) and NIS (71.6 mg, 0.318 mmol) following the GP1 afforded the title compound **2p** as off white solid (128 mg, 86% yield); mp 162-164 °C;  $R_f$ : 0.52 (30% Ethyl Acetate-Petroleum Ether);  $^1\text{H}$  NMR (400 MHz, DMSO- $d_6$ )  $\delta$   $^1\text{H}$  NMR (400 MHz,

DMSO- $d_6$ )  $\delta$  11.09 (s, 1H), 7.46-7.40 (m, 3H), 7.26-7.20 (m, 3H), 7.14-7.06 (m, 2H), 7.05-7.00 (m, 1H), 6.90-6.85 (m, 1H), 6.82-6.77 (m, 1H), 6.70 (t,  $J = 7.39$  Hz, 1H), 6.55 (d,  $J = 7.80$  Hz, 1H), 6.12 (s, 1H), 5.23-5.20 (m, 1H), 2.73 (dd,  $J = 18.47, 2.66$  Hz, 1H), 2.49-2.41 (m, 4H) ppm;  $^{13}\text{C}\{^1\text{H}\}$  NMR (100 MHz, DMSO- $d_6$ )  $\delta$  202.0, 179.2, 151.4, 136.3, 135.9, 130.2, 129.4, 129.0, 128.4, 128.2, 125.6, 124.3, 123.3, 121.9, 120.9, 119.1, 117.7, 117.3, 113.6, 108.6, 105.1, 63.9, 63.0, 45.1, 16.8 ppm; HRMS (ESI): calcd. for  $\text{C}_{27}\text{H}_{22}\text{N}_2\text{OI}$   $[\text{M}+\text{H}]^+$ : 517.0777, found 517.0778.

**2'-(7-methoxy-1*H*-indol-3-yl)-3-iodo-2-phenylspiro[cyclopentane-1,3'-indolin]-2-en-4-one**

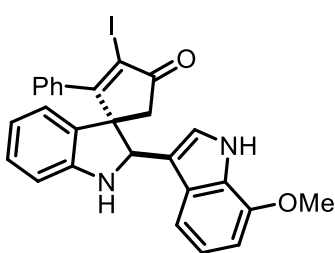

**one (2q):** Reaction of ynone **1a** (75 mg, 0.289 mmol), 7-methoxyindole (42.5 mg, 0.289 mmol) and NIS (71.6 mg, 0.318 mmol) following the GP1 afforded the title compound **2q** as yellow solid (140 mg, 90% yield); mp 169-172 °C;  $R_f$ : 0.46 (30% Ethyl Acetate-Petroleum Ether);  $^1\text{H}$  NMR (400 MHz, DMSO- $d_6$ )

$\delta$   $^1\text{H}$  NMR (400 MHz, DMSO- $d_6$ )  $\delta$  11.23 (d,  $J = 2.2$  Hz, 1H), 7.46-7.41 (m, 3H), 7.25-7.19 (m, 2H), 7.14 (d,  $J = 2.6$  Hz, 1H), 7.12-7.06 (m, 2H), 6.84-6.80 (m, 2H), 6.69 (dt,  $J = 7.4, 0.8$  Hz, 1H), 6.66-6.62 (m, 1H), 6.54 (d,  $J = 7.70$  Hz, 1H), 6.14 (d,  $J = 2.1$  Hz, 1H), 5.19 (d,  $J = 2.0$  Hz, 1H), 3.89 (s, 3H), 2.72 (d,  $J = 18.5$  Hz, 1H), 2.44 (d,  $J = 18.4$  Hz, 1H) ppm;  $^{13}\text{C}\{^1\text{H}\}$  NMR (100 MHz, DMSO- $d_6$ )  $\delta$  201.8, 179.0, 151.3, 146.2, 135.9, 130.1, 129.3, 129.0, 128.3, 128.1, 127.4, 126.8, 124.0, 123.3, 119.5, 117.7, 113.7, 112.4, 108.6, 105.1, 101.8, 63.9, 62.9, 55.1, 45.0 ppm; HRMS (ESI): calcd. for  $\text{C}_{27}\text{H}_{22}\text{N}_2\text{O}_2\text{I}$   $[\text{M}+\text{H}]^+$ : 533.0726, found 533.0724.

### 2'-(7-benzyloxy-1*H*-indol-3-yl)-3-iodo-2-phenylspiro[cyclopentane-1,3'-indolin]-2-en-4-one (2r)

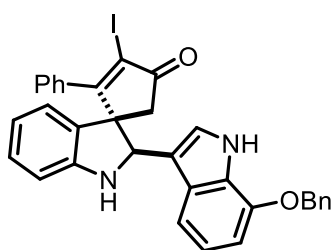

**one (2r):** Reaction of ynone **1a** (75 mg, 0.289 mmol), 7-benzyloxyindole (64.5 mg, 0.289 mmol) and NIS (71.6 mg, 0.318 mmol) following the GP1 afforded the title compound **2r** as off white solid (162 mg, 92% yield); mp 120-123 °C;  $R_f$ : 0.55 (30% Ethyl Acetate-Petroleum Ether);  $^1\text{H NMR}$  (400 MHz, DMSO- $d_6$ )

$\delta$   $^1\text{H NMR}$  (400 MHz, DMSO- $d_6$ )  $\delta$  11.26 (d,  $J = 2.4$  Hz, 1H), 7.59-7.55 (m, 2H), 7.46-7.40 (m, 5H), 7.36-7.33 (m, 1H), 7.24-7.20 (m, 2H), 7.16 (d,  $J = 2.6$  Hz, 1H), 7.12-7.06 (m, 2H), 6.84-6.78 (m, 2H), 6.75-6.67 (m, 2H), 6.55 (d,  $J = 7.7$  Hz, 1H), 6.14 (d,  $J = 2.1$  Hz, 1H), 5.24 (s, 2H), 5.20 (d,  $J = 2.0$  Hz, 1H), 2.74 (d,  $J = 18.5$  Hz, 1H), 2.45 (d,  $J = 18.4$  Hz, 1H) ppm;  $^{13}\text{C}\{^1\text{H}\}$  NMR (100 MHz, DMSO- $d_6$ )  $\delta$  201.9, 179.1, 151.3, 145.2, 137.3, 135.9, 130.1, 129.4, 129.0, 128.5, 128.4, 128.1, 127.8, 127.6 (2), 127.1, 124.2, 123.4, 119.5, 117.8, 113.8, 112.7, 108.7, 105.1, 103.2, 69.2, 63.9, 62.9, 45.0 ppm; HRMS (ESI): calcd. for  $\text{C}_{33}\text{H}_{26}\text{N}_2\text{O}_2\text{I} [\text{M}+\text{H}]^+$ : 609.1039, found 609.1041.

### 3-iodo-2'-(2-methyl-1*H*-indol-3-yl)-2-phenylspiro[cyclopentane-1,3'-indolin]-2-en-4-one (2s)

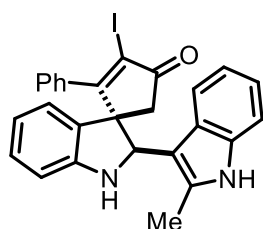

**(2s):** Reaction of ynone **1a** (75 mg, 0.289 mmol), 2-methylindole (38 mg, 0.289 mmol) and NIS (71.6 mg, 0.318 mmol) following the GP1 afforded the title compound **2s** as yellow solid (135 mg, 88% yield); mp 77-80 °C;  $R_f$ : 0.51 (30% Ethyl Acetate-Petroleum Ether);  $^1\text{H NMR}$  (400 MHz, DMSO- $d_6$ )  $\delta$  10.99 (s, 1H), 7.46-7.40 (m, 3H), 7.28-7.15

(m, 4H), 7.14-7.08 (m, 1H), 7.01-6.96 (m, 2H), 6.86-6.80 (m, 1H), 6.70-6.64 (m, 1H), 6.54 (d,  $J = 7.84$  Hz, 1H), 6.09 (s, 1H), 5.24 (s, 1H), 2.73 (d,  $J = 18.45$  Hz, 1H), 2.53 (d,  $J = 18.48$ , 1H), 2.15 (s, 3H) ppm;  $^{13}\text{C}\{^1\text{H}\}$  NMR (100 MHz, DMSO- $d_6$ )  $\delta$  202.1, 178.9, 151.4, 135.6, 135.5, 133.9, 130.1, 129.6, 129.2, 128.3, 128.3, 127.2, 123.1, 120.4, 118.7, 117.4, 110.7, 108.4, 108.2, 104.2, 64.0, 62.1, 45.9 ppm; HRMS (ESI): calcd. for  $\text{C}_{27}\text{H}_{22}\text{N}_2\text{OI} [\text{M}+\text{H}]^+$ : 517.0777, found 517.0782.

### 3-iodo-2-phenyl-2'-(2-phenyl-1*H*-indol-3-yl)spiro[cyclopentane-1,3'-indolin]-2-en-4-one (2t)

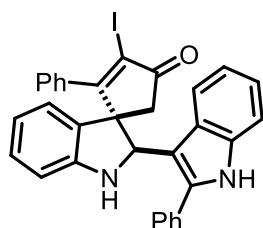

**(2t):** Reaction of ynone **1a** (75 mg, 0.289 mmol), 2-phenylindole (56 mg, 0.289 mmol) and NIS (71.6 mg, 0.318 mmol) following the GP1 afforded the title compound **2t** as yellow solid (156 mg, 94% yield); mp 180-183 °C;  $R_f$ : 0.67 (30% Ethyl Acetate-Petroleum Ether);  $^1\text{H NMR}$  (400 MHz, DMSO- $d_6$ )  $\delta$  11.44 (s, 1H), 7.58-7.48 (m, 3H), 7.41-

7.29 (m, 4H), 7.27-7.21 (m, 2H), 7.16-7.05 (m, 4H), 6.90-6.82 (m, 1H), 6.74-6.65 (m, 3H), 6.45 (d,  $J = 7.67$  Hz, 1H), 6.13 (s, 1H), 5.19 (s, 1H), 2.85-2.70 (m, 2H) ppm;  $^{13}\text{C}\{^1\text{H}\}$  NMR (100 MHz, DMSO- $d_6$ )  $\delta$  202.3, 180.0, 151.8, 137.2, 136.4, 135.3, 132.0, 129.6, 129.3, 129.0, 128.8, 128.4, 128.1, 127.5, 126.5, 123.5, 121.9, 120.6, 119.4, 117.1, 111.6, 111.3, 107.6, 104.0, 63.6, 61.3, 46.0 ppm; HRMS (ESI): calcd. for  $\text{C}_{32}\text{H}_{24}\text{N}_2\text{OI}[\text{M}+\text{H}]^+$ : 579.0933, found 579.0931.

**2'-(1-ethyl-2-methyl-1*H*-indol-3-yl)-3-iodo-2-phenylspiro[cyclopentane-1,3'-indolin]-2-**

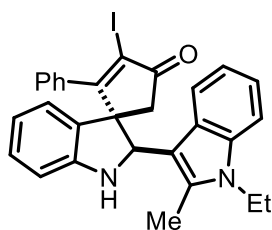

**en-4-one (2u):** Reaction of ynone **1a** (75 mg, 0.289 mmol), 1-ethyl-2-methylindole (46 mg, 0.289 mmol) and NIS (71.6 mg, 0.318 mmol) following the GP1 afforded the title compound **2u** as yellow solid (146 mg, 93% yield); mp 157-159 °C;  $R_f$  : 0.68 (30% Ethyl Acetate-Petroleum Ether);  $^1\text{H}$  NMR (400 MHz, DMSO- $d_6$ )  $\delta$  7.46-7.37 (m, 4H),

7.26-7.20 (m, 3H), 7.11 (dd,  $J = 7.63, 1.24$  Hz, 1H), 7.08-7.03 (m, 1H), 7.00-6.95 (m, 1H), 6.86 (dd,  $J = 7.51, 0.76$  Hz, 1H), 6.67 (dt,  $J = 7.40, 0.89$  Hz, 1H), 6.54 (d,  $J = 7.75$  Hz, 1H), 6.13 (d,  $J = 1.61$  Hz, 1H), 5.28 (bs, 1H), 4.18-4.08 (m, 2H), 2.68 (d,  $J = 18.10$  Hz, 1H), 2.53 (d,  $J = 18.20$  Hz, 1H), 2.17 (s, 3H), 1.18 (t,  $J = 7.10$  Hz, 3H) ppm;  $^{13}\text{C}\{^1\text{H}\}$  NMR (100 MHz, DMSO- $d_6$ )  $\delta$  202.0, 178.8, 151.4, 135.5, 134.5, 130.0, 129.7, 129.3, 128.4, 128.3, 126.6, 123.1, 120.6, 118.9, 117.4, 109.3, 108.7, 108.3, 104.1, 64.1, 62.3, 46.0, 37.2, 15.1 ppm; HRMS (ESI): calcd. for  $\text{C}_{29}\text{H}_{26}\text{N}_2\text{OI}[\text{M}+\text{H}]^+$ : 545.1090, found 545.1099.

**2'-(1-methyl-1*H*-indol-3-yl)-3-iodo-2-phenylspiro[cyclopentane-1,3'-indolin]-2-en-4-one**

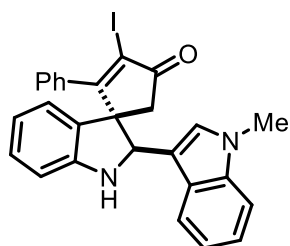

**(2v):** Reaction of ynone **1a** (75 mg, 0.289 mmol), 1-methylindole (38 mg, 0.289 mmol) and NIS (71.6 mg, 0.318 mmol) following the GP1 afforded the title compound **2v** as yellow solid (140 mg, 94% yield); mp 82-84 °C;  $R_f$ : 0.72 (30% Ethyl Acetate-Petroleum Ether);

$^1\text{H}$  NMR (400 MHz, DMSO- $d_6$ )  $\delta$  7.47-7.39 (m, 4H), 7.30-7.18 (m, 4H), 7.16-7.06 (m, 3H), 6.96-6.91 (m, 1H), 6.71 (t,  $J = 7.42$  Hz, 1H), 6.56 (d,  $J = 7.78$  Hz, 1H), 6.14 (s, 1H), 5.20 (d,  $J = 1.94$  Hz, 1H), 3.76 (s, 3H), 2.75 (d,  $J = 18.49$  Hz, 1H), 2.46 (d,  $J = 18.55$  Hz, 1H) ppm;  $^{13}\text{C}\{^1\text{H}\}$  NMR (100 MHz, DMSO- $d_6$ )  $\delta$  201.9, 179.0, 151.2, 137.1, 135.9, 130.2, 129.4, 129.1, 128.9, 128.4, 128.1, 126.2, 123.3, 121.4, 119.8, 119.0, 117.8, 112.3, 110.1, 108.7, 105.1, 63.8, 62.7, 45.1, 32.5 ppm; HRMS (ESI): calcd. for  $\text{C}_{27}\text{H}_{22}\text{N}_2\text{OI}[\text{M}+\text{H}]^+$ : 517.0777, found 517.0778.

**2'-(1*H*-indol-3-yl)-3-iodo-2-(*p*-tolyl)spiro[cyclopentane-1,3'-indolin]-2-en-4-one (2w):**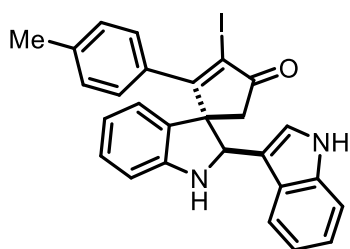

Reaction of ynone **1b** (75 mg, 0.274 mmol), indole (32.1 mg, 0.274 mmol) and NIS (67.9 mg, 0.302 mmol) following the GP1 afforded the title compound **2w** as yellow solid (120 mg, 85% yield); mp 121-123 °C;  $R_f$ : 0.51 (30% Ethyl Acetate-Petroleum Ether);  $^1\text{H}$  NMR (400 MHz, DMSO- $d_6$ )  $\delta$  11.10 (s, 1H), 7.39-7.34 (m, 1H), 7.26-7.20 (m, 4H), 7.17-7.01 (m, 5H), 6.92-6.86 (m, 1H), 6.73-6.66 (m, 1H), 6.56 (d,  $J$  = 7.78 Hz, 1H), 6.14 (s, 1H), 5.20 (d,  $J$  = 1.75 Hz, 1H), 2.71 (d,  $J$  = 18.43 Hz, 1H), 2.42 (d,  $J$  = 18.39 Hz, 1H), 2.33 (s, 3H) ppm;  $^{13}\text{C}\{^1\text{H}\}$  NMR (100 MHz, DMSO- $d_6$ )  $\delta$  201.8, 179.0, 151.3, 139.1, 136.7, 132.9, 130.4, 129.0, 128.9, 128.2, 125.9, 124.5, 123.3, 121.3, 119.7, 118.9, 117.8, 113.1, 111.8, 108.7, 104.7, 63.9, 63.1, 45.1, 20.9 ppm; HRMS (ESI): calcd. for  $\text{C}_{27}\text{H}_{22}\text{N}_2\text{OI}$  [ $\text{M}+\text{H}$ ] $^+$ : 517.0777, found 517.0780.

**2-(4-butylphenyl)-2'-(1*H*-indol-3-yl)-3-iodospiro[cyclopentane-1,3'-indolin]-2-en-4-one (2x):**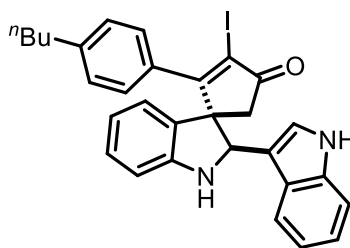

(**2x**): Reaction of ynone **1c** (89 mg, 0.190 mmol), indole (22.3 mg, 0.190 mmol) and NIS (47.1 mg, 0.209 mmol) following the GP1 afforded the title compound **2x** as pale brown solid (86 mg, 81% yield); mp 147-149 °C;  $R_f$ : 0.40 (30% Ethyl Acetate-Petroleum Ether);  $^1\text{H}$  NMR (400 MHz, DMSO- $d_6$ )  $\delta$  11.11 (s, 1H), 7.40-7.35 (m, 1H), 7.30-7.17 (m, 6H), 7.13-7.01 (m, 3H), 6.92-6.85 (m, 1H), 6.73-6.66 (m, 1H), 6.61-6.55 (m, 1H), 6.18 (s, 1H), 5.22 (s, 1H), 2.73 (d,  $J$  = 18.36 Hz, 1H), 2.60 (t,  $J$  = 7.72 Hz, 2H), 2.40 (d,  $J$  = 18.38 Hz, 1H), 1.63-1.52 (m, 2H), 1.36-1.26 (m, 2H), 0.90 (t,  $J$  = 7.32 Hz, 3H) ppm;  $^{13}\text{C}\{^1\text{H}\}$  NMR (100 MHz, DMSO- $d_6$ )  $\delta$  201.9, 178.7, 151.2, 144.0, 136.7, 133.1, 130.7, 129.0, 128.4, 128.3, 126.0, 124.5, 123.2, 121.4, 119.6, 118.9, 117.9, 112.9, 111.8, 108.8, 104.8, 64.0, 63.1, 45.2, 34.7, 32.8, 21.9, 13.9 ppm; HRMS (ESI): calcd. for  $\text{C}_{30}\text{H}_{28}\text{N}_2\text{OI}$  [ $\text{M}+\text{H}$ ] $^+$ : 559.1246, found 559.1245.

**2'-(1*H*-indol-3-yl)-2-(4-ethoxyphenyl)spiro[cyclopentane-1,3'-indolin]-2-en-4-one (2y):**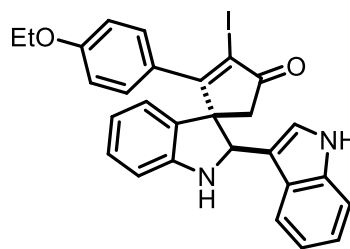

Reaction of ynone **1d** (81 mg, 0.267 mmol), indole (31.3 mg, 0.267 mmol) and NIS (66.1 mg, 0.293 mmol) following the GP1 afforded the title compound **2y** as pale brown solid (137 mg, 94% yield); mp 173-176 °C;  $R_f$ : 0.40 (30% Ethyl Acetate-Petroleum Ether);  $^1\text{H}$  NMR (400 MHz, DMSO- $d_6$ )  $\delta$  11.10 (d,  $J$  = 1.99 Hz, 1H), 7.37-7.33 (m, 1H), 7.30-7.25 (m, 2H), 7.22 (d,  $J$  = 2.45 Hz, 1H), 7.17 (d,  $J$  =

8.01 Hz, 1H), 7.10 (dd,  $J = 7.75, 1.22$  Hz, 1H), 7.05 (dd,  $J = 7.12, 1.04$  Hz, 1H), 7.01-6.97 (m, 3H), 6.87 (dd,  $J = 7.05, 0.91$  Hz, 1H), 6.68 (dt,  $J = 7.41, 0.93$  Hz, 1H), 6.59 (d,  $J = 7.75$  Hz, 1H), 6.21 (bs, 1H), 5.23 (s, 1H), 4.05 (q,  $J = 6.99$  Hz, 2H), 2.71 (d,  $J = 18.36$  Hz, 1H), 2.36 (d,  $J = 18.35$  Hz, 1H), 1.32 (t,  $J = 6.97$  Hz, 3H) ppm;  $^{13}\text{C}\{^1\text{H}\}$  NMR (100 MHz, DMSO- $d_6$ )  $\delta$  201.8, 178.1, 159.5, 151.1, 136.7, 131.1, 130.4, 129.0, 127.4, 126.0, 124.5, 123.1, 121.4, 119.5, 118.9, 118.0, 114.2, 112.9, 111.9, 108.9, 103.9, 63.9, 63.4, 63.3, 45.3, 14.7 ppm; HRMS (ESI): calcd. for  $\text{C}_{28}\text{H}_{24}\text{N}_2\text{O}_2\text{I}$   $[\text{M}+\text{H}]^+$ : 547.0882, found 547.0872.

**2'-(1*H*-indol-3-yl)-3-iodo-2-(*m*-tolyl)spiro[cyclopentane-1,3'-indolin]-2-en-4-one (2z):**

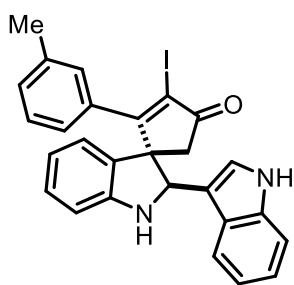

Reaction of ynone **1e** (53 mg, 0.194 mmol), indole (22.7 mg, 0.194 mmol) and NIS (48 mg, 0.213 mmol) following the GP1 afforded the title compound **2z** as off white solid (91 mg, 91% yield); mp 133-136 °C;  $R_f$ : 0.52 (30% Ethyl Acetate-Petroleum Ether);  $^1\text{H}$  NMR (400 MHz, DMSO- $d_6$ )  $\delta$  11.11 (d,  $J = 1.68$  Hz, 1H), 7.40-7.29 (m, 2H), 7.28-7.18 (m, 3H), 7.13-7.04 (m, 3H), 7.01-6.96 (m, 2H), 6.91-6.85 (m, 1H), 6.74-6.68 (m, 1H), 6.55 (d,  $J = 7.74$  Hz, 1H), 6.12 (d,  $J = 1.87$  Hz, 1H), 5.18 (d,  $J = 2.01$  Hz, 1H), 2.71 (d,  $J = 18.45$  Hz, 1H), 2.45 (d,  $J = 18.44$  Hz, 1H), 2.27 (s, 3H) ppm;  $^{13}\text{C}\{^1\text{H}\}$  NMR (100 MHz, DMSO- $d_6$ )  $\delta$  202.0, 179.4, 151.4, 137.4, 136.8, 135.9, 130.2, 130.0, 129.0, 128.6, 128.3, 125.9, 125.2, 124.7, 123.4, 121.4, 119.7, 118.9, 117.7, 113.2, 111.9, 108.6, 104.9, 63.9, 63.0, 44.9, 21.2 ppm; HRMS (ESI): calcd. for  $\text{C}_{27}\text{H}_{22}\text{N}_2\text{OI}$   $[\text{M}+\text{H}]^+$ : 517.0777, found 517.0771.

**2-(3-fluorophenyl)-2'-(1*H*-indol-3-yl)-3-iodospiro[cyclopentane-1,3'-indolin]-2-en-4-one (2aa):**

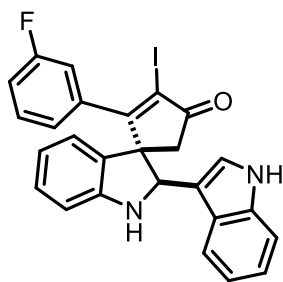

Reaction of ynone **1f** (97.5 mg, 0.351 mmol), indole (41.2 mg, 0.351 mmol) and NIS (87 mg, 0.387 mmol) following the GP1 afforded the title compound **2aa** as yellow solid (154 mg, 84% yield); mp 162-164 °C;  $R_f$ : 0.46 (30% Ethyl Acetate-Petroleum Ether);  $^1\text{H}$  NMR (400 MHz, DMSO- $d_6$ )  $\delta$  11.10 (s, 1H), 7.52-7.44 (m, 1H), 7.40-7.35 (m, 1H), 7.31-7.24 (m, 2H), 7.16-7.10 (m, 3H), 7.09-7.01 (m, 2H), 6.92-6.84 (m, 2H), 6.75-6.68 (m, 1H), 6.56-6.50 (m, 1H), 6.10 (s, 1H), 5.17 (d,  $J = 1.17$  Hz, 1H), 2.70 (d,  $J = 18.55$  Hz, 1H), 2.53 (d,  $J = 18.49$  Hz, 1H) ppm;  $^{13}\text{C}\{^1\text{H}\}$  NMR (100 MHz, DMSO- $d_6$ )  $\delta$  201.9, 178.0, 161.5 (d,  $J = 244.10$  Hz), 151.6, 138.1 (d,  $J = 7.91$  Hz), 136.9, 130.5 (d,  $J = 8.28$  Hz), 129.3 (d,  $J = 10.32$  Hz), 125.7, 124.8, 124.4, 123.5, 121.4, 119.8, 119.0,

117.7, 116.1 (d,  $J = 20.71$  Hz), 114.9, 114.7, 113.5, 111.8, 108.6, 105.6, 63.7, 63.0, 44.6 ppm; HRMS (ESI): calcd. for  $C_{26}H_{19}N_2OFI$   $[M+H]^+$ : 521.0526, found 521.0527.

**2'-(1*H*-indol-3-yl)-3-iodo-2-pentylspiro[cyclopentane-1,3'-indolin]-2-en-4-one (2ab):**

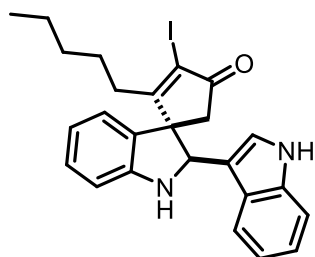

Reaction of ynone **1g** (105 mg, 0.414 mmol), indole (48.6 mg, 0.414 mmol) and NIS (102.6 mg, 0.455 mmol) following the GP1 afforded the title compound **2ab** as off white solid (182 mg, 88% yield); mp 172-174 °C;  $R_f$ : 0.52 (30% Ethyl Acetate-Petroleum Ether);  $^1H$  NMR (400 MHz, DMSO- $d_6$ )  $\delta$  11.07 (s, 1H), 7.37-7.31 (m, 1H), 7.28-7.22 (m, 1H), 7.13-6.96 (m, 3H), 6.95-6.90 (m, 1H), 6.86-6.80 (m, 1H), 6.70-6.60 (m, 2H), 6.26 (s, 1H), 5.18 (s, 1H), 2.78-2.53 (m, 3H), 2.28 (d,  $J = 18.40$  Hz, 1H), 1.64-1.45 (m, 1H), 1.40-1.18 (m, 5H), 0.79 (t,  $J = 6.91$  Hz, 3H) ppm;  $^{13}C\{^1H\}$  NMR (100 MHz, DMSO- $d_6$ )  $\delta$  201.6, 184.4, 151.8, 136.8, 130.1, 128.9, 125.6, 124.7, 123.6, 121.3, 119.6, 118.9, 117.6, 113.8, 111.8, 108.8, 103.2, 63.4, 62.8, 44.0, 32.1, 31.7, 27.0, 21.6, 13.7 ppm; HRMS (ESI): calcd. for  $C_{25}H_{26}N_2OI$   $[M+H]^+$ : 497.1090, found 497.1088.

**2-cyclohexyl-2'-(1*H*-indol-3-yl)-3-iodospiro[cyclopentane-1,3'-indolin]-2-en-4-one (2ac):**

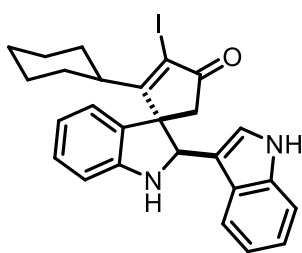

Reaction of ynone **1h** (67 mg, 0.252 mmol), indole (29.6 mg, 0.252 mmol) and NIS (62.5 mg, 0.277 mmol) following the GP1 afforded the title compound **2ac** as off white solid (106 mg, 83% yield); mp 176-179 °C;  $R_f$ : 0.52 (30% Ethyl Acetate-Petroleum Ether);  $^1H$  NMR (400 MHz, DMSO- $d_6$ )  $\delta$  11.08 (s, 1H), 7.40-7.32 (m, 1H), 7.27-7.17 (m, 2H), 7.14-7.03 (m, 2H), 6.95-6.84 (m, 2H), 6.70-6.60 (m, 2H), 6.31 (s, 1H), 5.22 (s, 1H), 2.77-2.64 (m, 1H), 2.54 (d,  $J = 18.50$  Hz, 1H), 2.45-2.31 (m, 1H), 2.26-2.04 (m, 2H), 1.95-1.78 (m, 2H), 1.74-1.60 (m, 2H), 1.44-1.17 (m, 3H), 1.07-0.93 (m, 1H) ppm;  $^{13}C\{^1H\}$  NMR (100 MHz, DMSO- $d_6$ )  $\delta$  202.0, 184.3, 151.9, 136.9, 130.0, 128.9, 125.8, 124.6, 123.5, 121.3, 120.0, 118.9, 117.5, 113.3, 111.8, 108.7, 99.9, 65.2, 62.9, 43.7, 28.4, 28.3, 25.8, 25.4 ppm; HRMS (ESI): calcd. for  $C_{26}H_{26}N_2OI$   $[M+H]^+$ : 509.1090, found 509.1077.

**2-cyclopropyl-2'-(1*H*-indol-3-yl)-3-iodospiro[cyclopentane-1,3'-indolin]-2-en-4-one (2ad):**

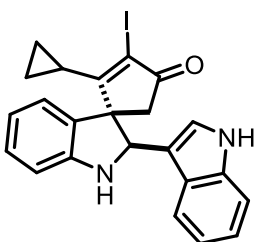

Reaction of ynone **1i** (50 mg, 0.224 mmol), indole (26.2 mg, 0.224 mmol) and NIS (55.4 mg, 0.246 mmol) following the GP1 afforded the title compound **2ad** as off white solid (93 mg, 89% yield); mp 126-130 °C;  $R_f$ : 0.43 (30% Ethyl Acetate-Petroleum Ether);  $^1H$  NMR (400 MHz, DMSO- $d_6$ )  $\delta$  11.10 (d,  $J = 1.55$  Hz, 1H), 7.37-7.26 (m,

3H), 7.11-7.02 (m, 2H), 6.95-6.87 (m, 2H), 6.61-6.68 (m, 2H), 6.32 (d,  $J = 1.71$  Hz, 1H), 5.50 (d,  $J = 1.62$  Hz, 1H), 2.72 (d,  $J = 18.15$  Hz, 1H), 2.06 (d,  $J = 18.15$  Hz, 1H), 1.99-1.91 (m, 1H), 1.57-1.42 (m, 2H), 1.27-1.17 (m, 1H), 1.11-1.01 (m, 1H), ppm;  $^{13}\text{C}\{^1\text{H}\}$  NMR (100 MHz, DMSO- $d_6$ )  $\delta$  200.6, 181.6, 151.4, 136.6, 131.5, 128.6, 126.1, 124.6, 123.4, 121.3, 119.3, 118.8, 118.0, 112.3, 111.8, 109.1, 98.0, 64.0, 63.7, 44.3, 15.4, 9.4, 8.5 ppm; HRMS (ESI): calcd. for  $\text{C}_{23}\text{H}_{20}\text{N}_2\text{OI}$   $[\text{M}+\text{H}]^+$ : 467.0620, found 467.0610.

**3-iodo-2-phenyl-2'-(1H-pyrrol-2-yl)spiro[cyclopentane-1,3'-indolin]-2-en-4-one (3a):**

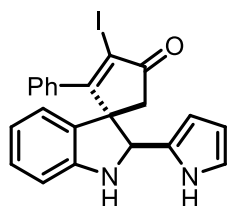

Reaction of ynone **1a** (75 mg, 0.289 mmol), pyrrole (19.4 mg, 0.289 mmol) and NIS (71.6 mg, 0.318 mmol) following the GP1 afforded the title compound **3a** as pale brown solid (112 mg, 86% yield); mp 160-162 °C;  $R_f$ : 0.62 (30% Ethyl Acetate-Petroleum Ether);  $^1\text{H}$  NMR (400 MHz, DMSO- $d_6$ )  $\delta$  10.85 (s, 1H), 7.45-7.39 (m, 3H), 7.22-7.17 (m, 2H), 7.12-7.05 (m, 2H), 6.75-6.69 (m, 2H), 6.57 (d,  $J = 7.77$  Hz, 1H), 6.22 (d,  $J = 2.34$  Hz, 1H), 5.98 (dd,  $J = 5.64, 2.96$  Hz, 1H), 5.79 (s, 1H), 4.90 (d,  $J = 2.94$  Hz, 1H), 2.50 (d,  $J = 18.46$  Hz, 1H), 2.32 (d,  $J = 18.46$  Hz, 1H) ppm;  $^{13}\text{C}\{^1\text{H}\}$  NMR (100 MHz, DMSO- $d_6$ )  $\delta$  201.4, 178.0, 150.8, 136.1, 132.8, 130.1, 129.2, 129.0, 128.8, 128.5, 128.4, 128.0, 123.7, 118.4, 117.8, 109.4, 107.8, 106.1, 105.9, 64.6, 62.9, 44.6 ppm; HRMS (ESI): calcd. for  $\text{C}_{22}\text{H}_{18}\text{N}_2\text{OI}$   $[\text{M}+\text{H}]^+$ : 453.0464, found 453.0479.

**2'-(5-ethyl-1H-pyrrol-2-yl)-3-iodo-2-phenylspiro[cyclopentane-1,3'-indolin]-2-en-4-one (3b):**

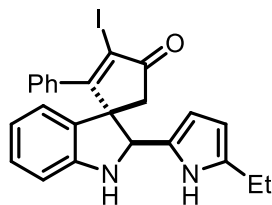

Reaction of ynone **1a** (75 mg, 0.289 mmol), 2-ethylpyrrole (27.5 mg, 0.289 mmol) and NIS (71.6 mg, 0.318 mmol) following the GP1 afforded the title compound **3b** as yellow solid (116 mg, 84% yield); mp 141-144 °C;  $R_f$ : 0.69 (30% Ethyl Acetate-Petroleum Ether);  $^1\text{H}$  NMR (400 MHz, DMSO- $d_6$ )  $\delta$  10.57 (s, 1H), 7.45-7.37 (m, 3H), 7.20-7.13 (m, 2H), 7.10-7.04 (m, 2H), 6.74-6.68 (m, 1H), 6.59-6.54 (m, 1H), 6.15 (bs, 1H), 5.70-5.60 (m, 2H), 4.85 (s, 1H), 2.60 (d,  $J = 18.36$  Hz, 1H), 2.54-2.47 (m, 2H), 2.32 (d,  $J = 18.39$  Hz, 1H), 1.11 (t,  $J = 7.54$  Hz, 3H) ppm;  $^{13}\text{C}\{^1\text{H}\}$  NMR (100 MHz, DMSO- $d_6$ )  $\delta$  201.7, 178.3, 150.9, 136.2, 134.2, 130.2, 129.3, 128.8, 128.5, 128.1, 126.8, 123.7, 118.4, 109.4, 106.0, 105.9, 104.1, 64.7, 63.2, 44.9, 20.4, 14.3 ppm; HRMS (ESI): calcd. for  $\text{C}_{24}\text{H}_{22}\text{N}_2\text{OI}$   $[\text{M}+\text{H}]^+$ : 481.0777, found 481.0792.



### 3-iodo-2'-(1-methyl-1H-pyrrol-2-yl)-2-phenylspiro[cyclopentane-1,3'-indolin]-2-en-4-

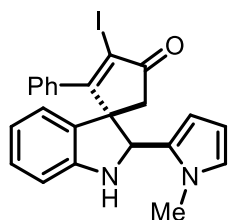

**one (3c):** Reaction of ynone **1a** (75 mg, 0.289 mmol), 1-methylpyrrole (23.5 mg, 0.289 mmol) and NIS (71.6 mg, 0.318 mmol) following the GP1 afforded the title compound **3c** as yellow solid (118 mg, 88% yield); mp 157-160 °C;  $R_f$ : 0.67 (30% Ethyl Acetate-Petroleum Ether);  $^1\text{H NMR}$  (400 MHz, DMSO- $d_6$ )  $\delta$  7.43-7.34 (m, 3H), 7.11-7.05 (m, 3H), 7.01-6.97 (m, 1H), 6.72-6.63 (m, 2H), 6.51 (d,  $J = 7.72$  Hz, 1H), 6.14 (d,  $J = 2.02$  Hz, 1H), 5.96-5.91 (m, 2H), 5.04 (d,  $J = 2.15$  Hz, 1H), 3.36 (s, 3H, merged with  $H_2O$  peak) 2.62 (d,  $J = 18.48$  Hz, 1H), 2.38 (d,  $J = 18.51$  Hz, 1H) ppm;  $^{13}\text{C}\{^1\text{H}\}$  NMR (100 MHz, DMSO- $d_6$ )  $\delta$  201.8, 179.0, 150.9, 135.4, 130.7, 129.5, 129.2 (2), 128.3, 127.9, 123.7, 123.3, 117.7, 108.6, 108.4, 106.7, 104.6, 63.9, 61.8, 45.1, 34.3 ppm; HRMS (ESI): calcd. for  $\text{C}_{23}\text{H}_{20}\text{N}_2\text{OI}$   $[\text{M}+\text{H}]^+$ : 467.0620, found 467.0616.

### 2-(4-ethoxyphenyl)-3-iodo-2'-(1-methyl-1H-pyrrol-2-yl)spiro[cyclopentane-1,3'-indolin]-2-en-4-one (3d):

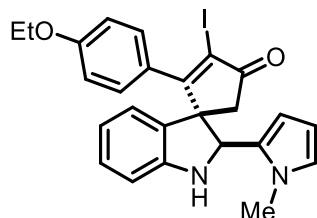

**2-en-4-one (3d):** Reaction of ynone **1d** (81 mg, 0.267 mmol), 1-methylpyrrole (21.7 mg, 0.267 mmol) and NIS (66.1 mg, 0.294 mmol) following the GP1 afforded the title compound **3d** as pale yellow solid (122 mg, 90% yield); mp 162-165 °C;  $R_f$ : 0.52 (30% Ethyl Acetate-Petroleum Ether);  $^1\text{H NMR}$  (400 MHz, DMSO- $d_6$ )  $\delta$  7.18-7.12 (m, 2H), 7.07 (dt,  $J = 7.61, 1.14$  Hz, 1H), 6.95-6.86 (m, 3H), 6.68-6.61 (m, 2H), 6.55 (d,  $J = 7.80$  Hz, 1H), 6.18 (bs, 1H), 5.99-5.91 (m, 2H), 5.06 (s, 1H), 4.02 (q,  $J = 6.98$  Hz, 2H), 3.29 (s, 3H) 2.49 (d,  $J = 18.35$  Hz, 1H), 2.40 (d,  $J = 18.42$  Hz, 1H), 1.30 (t,  $J = 6.96$  Hz, 3H) ppm;  $^{13}\text{C}\{^1\text{H}\}$  NMR (100 MHz, DMSO- $d_6$ )  $\delta$  201.8, 178.0, 159.7, 150.7, 130.5, 130.3 (2), 129.2, 126.9, 123.7, 123.1, 118.1, 114.2, 108.8, 108.6, 106.9, 103.4, 64.0, 63.4, 62.2, 45.6, 34.3, 14.7 ppm; HRMS (ESI): calcd. for  $\text{C}_{25}\text{H}_{24}\text{N}_2\text{O}_2\text{I}$   $[\text{M}+\text{H}]^+$ : 511.0882, found 511.0890.

### 3-iodo-2'-(5-methoxythiophen-2-yl)-2-phenylspiro[cyclopentane-1,3'-indolin]-2-en-4-one

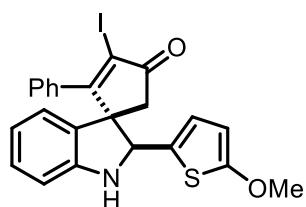

**(3e):** Reaction of ynone **1a** (75 mg, 0.289 mmol), 2-methoxythiophene (33 mg, 0.289 mmol) and NIS (71.6 mg, 0.318 mmol) following the GP1 afforded the title compound **3e** as yellow solid (132 mg, 92% yield); mp 155-158 °C;  $R_f$ : 0.69 (30% Ethyl Acetate-Petroleum Ether);  $^1\text{H NMR}$  (400 MHz,  $\text{CDCl}_3$ )  $\delta$  7.46-7.39 (m, 3H), 7.22-7.13 (m, 3H), 7.11-7.06 (m, 1H), 6.78-6.73 (m, 1H), 6.61-6.55 (m, 2H), 6.42 (d,  $J = 3.22$  Hz, 1H), 6.19 (d,  $J = 3.85$  Hz, 1H), 4.93 (d,  $J = 3.25$  Hz, 1H), 3.81 (s, 3H), 2.76 (d,  $J = 18.46$  Hz, 1H), 2.38 (d,  $J = 18.46$  Hz, 1H) ppm;  $^{13}\text{C}\{^1\text{H}\}$  NMR (100 MHz,  $\text{CDCl}_3$ )  $\delta$  201.3, 177.5, 164.9, 150.1,

135.9, 130.2, 129.4, 129.0, 128.6, 128.1, 123.8, 122.7, 119.1, 109.8, 106.9, 103.5, 64.4, 64.3, 60.0, 44.1 ppm; HRMS (ESI): calcd. for C<sub>23</sub>H<sub>19</sub>NO<sub>2</sub>S [M+H]<sup>+</sup>: 500.0181, found 500.0178.

**2'-(azulen-1-yl)-3-iodo-2-phenylspiro[cyclopentane-1,3'-indolin]-2-en-4-one (3f):**

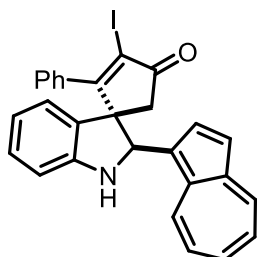

Reaction of ynone **1a** (75 mg, 0.289 mmol), azulene (37 mg, 0.289 mmol) and NIS (71.6 mg, 0.318 mmol) following the GP1 afforded the title compound **3f** as dark blue solid (140 mg, 94% yield); mp 164-168 °C; R<sub>f</sub>: 0.74 (30% Ethyl Acetate-Petroleum Ether); <sup>1</sup>H NMR (400 MHz, DMSO-d<sub>6</sub>) δ 8.41 (d, *J* = 9.34 Hz, 1H), 8.13 (d, *J* = 9.82 Hz, 1H), 7.81 (d, *J* = 3.85 Hz, 1H), 7.70 (t, *J* = 9.84 Hz, 1H), 7.53-7.44 (m, 3H), 7.40 (d, *J* = 3.89 Hz, 1H), 7.35-7.21 (m, 3H), 7.18-7.10 (m, 2H), 7.03 (d, *J* = 7.36 Hz, 1H), 6.76-6.70 (m, 1H), 6.64 (d, *J* = 7.76 Hz, 1H), 6.36 (s, 1H), 5.64 (s, 1H), 2.46 (d, *J* = 18.45 Hz, 1H), 2.35 (d, *J* = 18.45 Hz, 1H) ppm; <sup>13</sup>C {<sup>1</sup>H} NMR (100 MHz, DMSO-d<sub>6</sub>) δ 201.5, 178.1, 151.2, 141.2, 138.5, 137.4, 136.8, 135.7, 135.6, 133.9, 130.2, 129.7, 129.1, 128.4 (2), 127.0, 123.6, 123.3, 122.7, 118.2, 117.5, 109.0, 105.0, 64.4, 63.2, 45.3 ppm; HRMS (ESI): calcd. for C<sub>28</sub>H<sub>21</sub>NOI [M+H]<sup>+</sup>: 514.0668, found 514.0671.

### 5. References:

- (a) James, M. J.; Cuthbertson, J. D.; O'Brien, P.; Taylor, R. J. K.; Unsworth. *Angew. Chem., Int. Ed.* **2015**, *54*, 7640. (b) Liddon, J. T. R.; Clarke, A. K.; Taylor, R. J. K.; Unsworth, W. P. *Org. Lett.* **2016**, *18*, 6328. (c) James, M. J.; Clubley, R. E.; Palate, K. Y.; Procter, T. J.; Wyton, A. C.; O'Brien, P.; Taylor, R. J. K.; Unsworth, W. P. *Org. Lett.* **2015**, *17*, 4372.

## Copies of $^1\text{H}$ and $^{13}\text{C}$ NMR Spectra

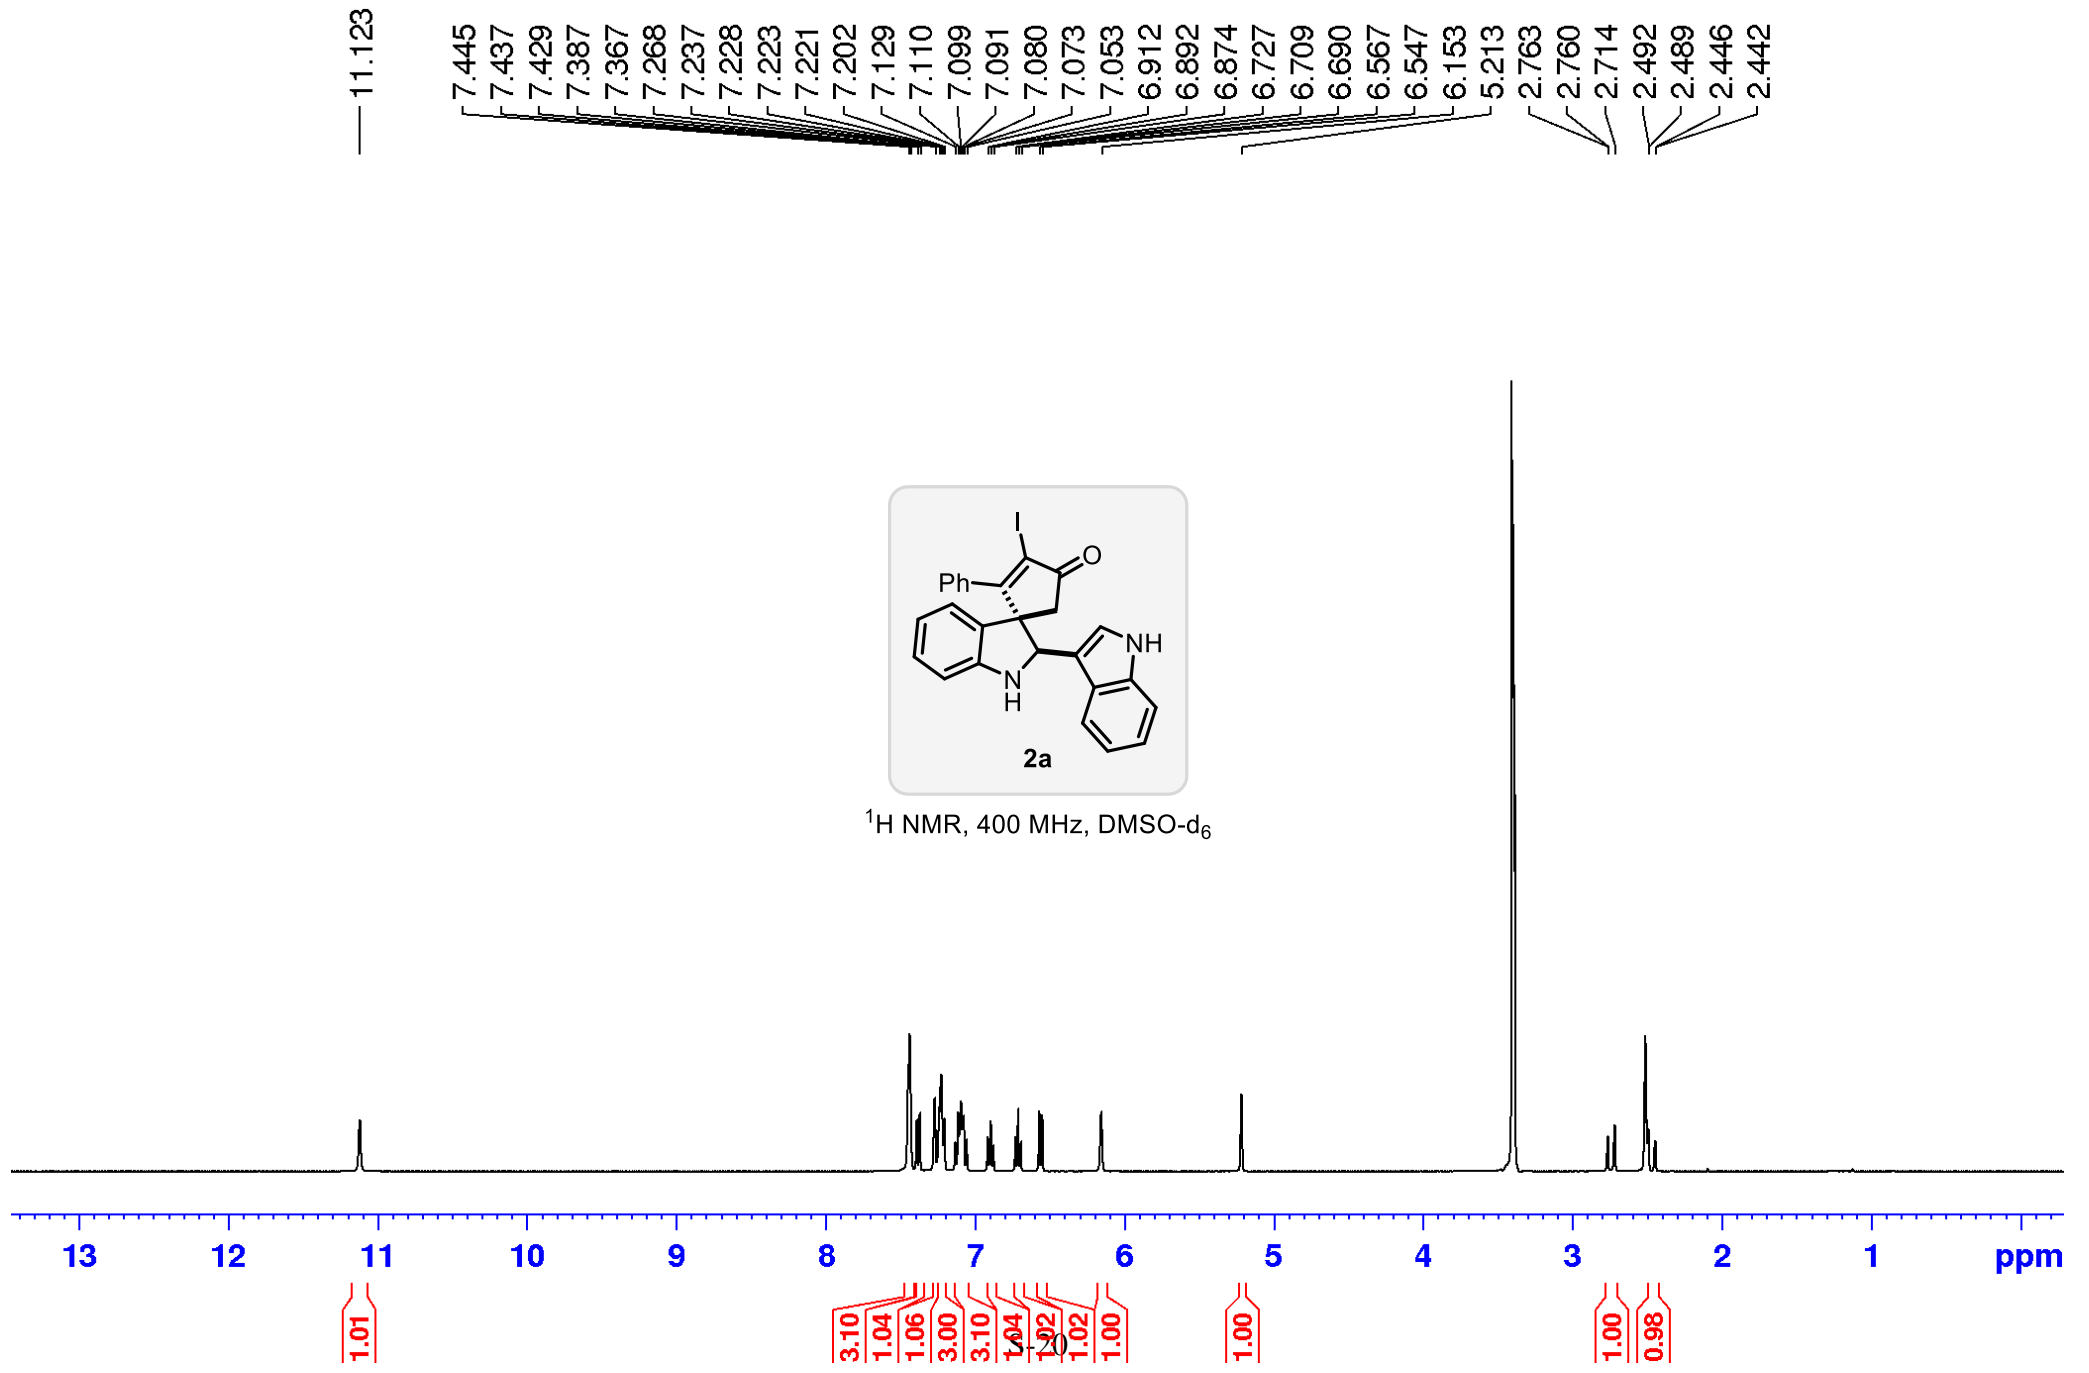

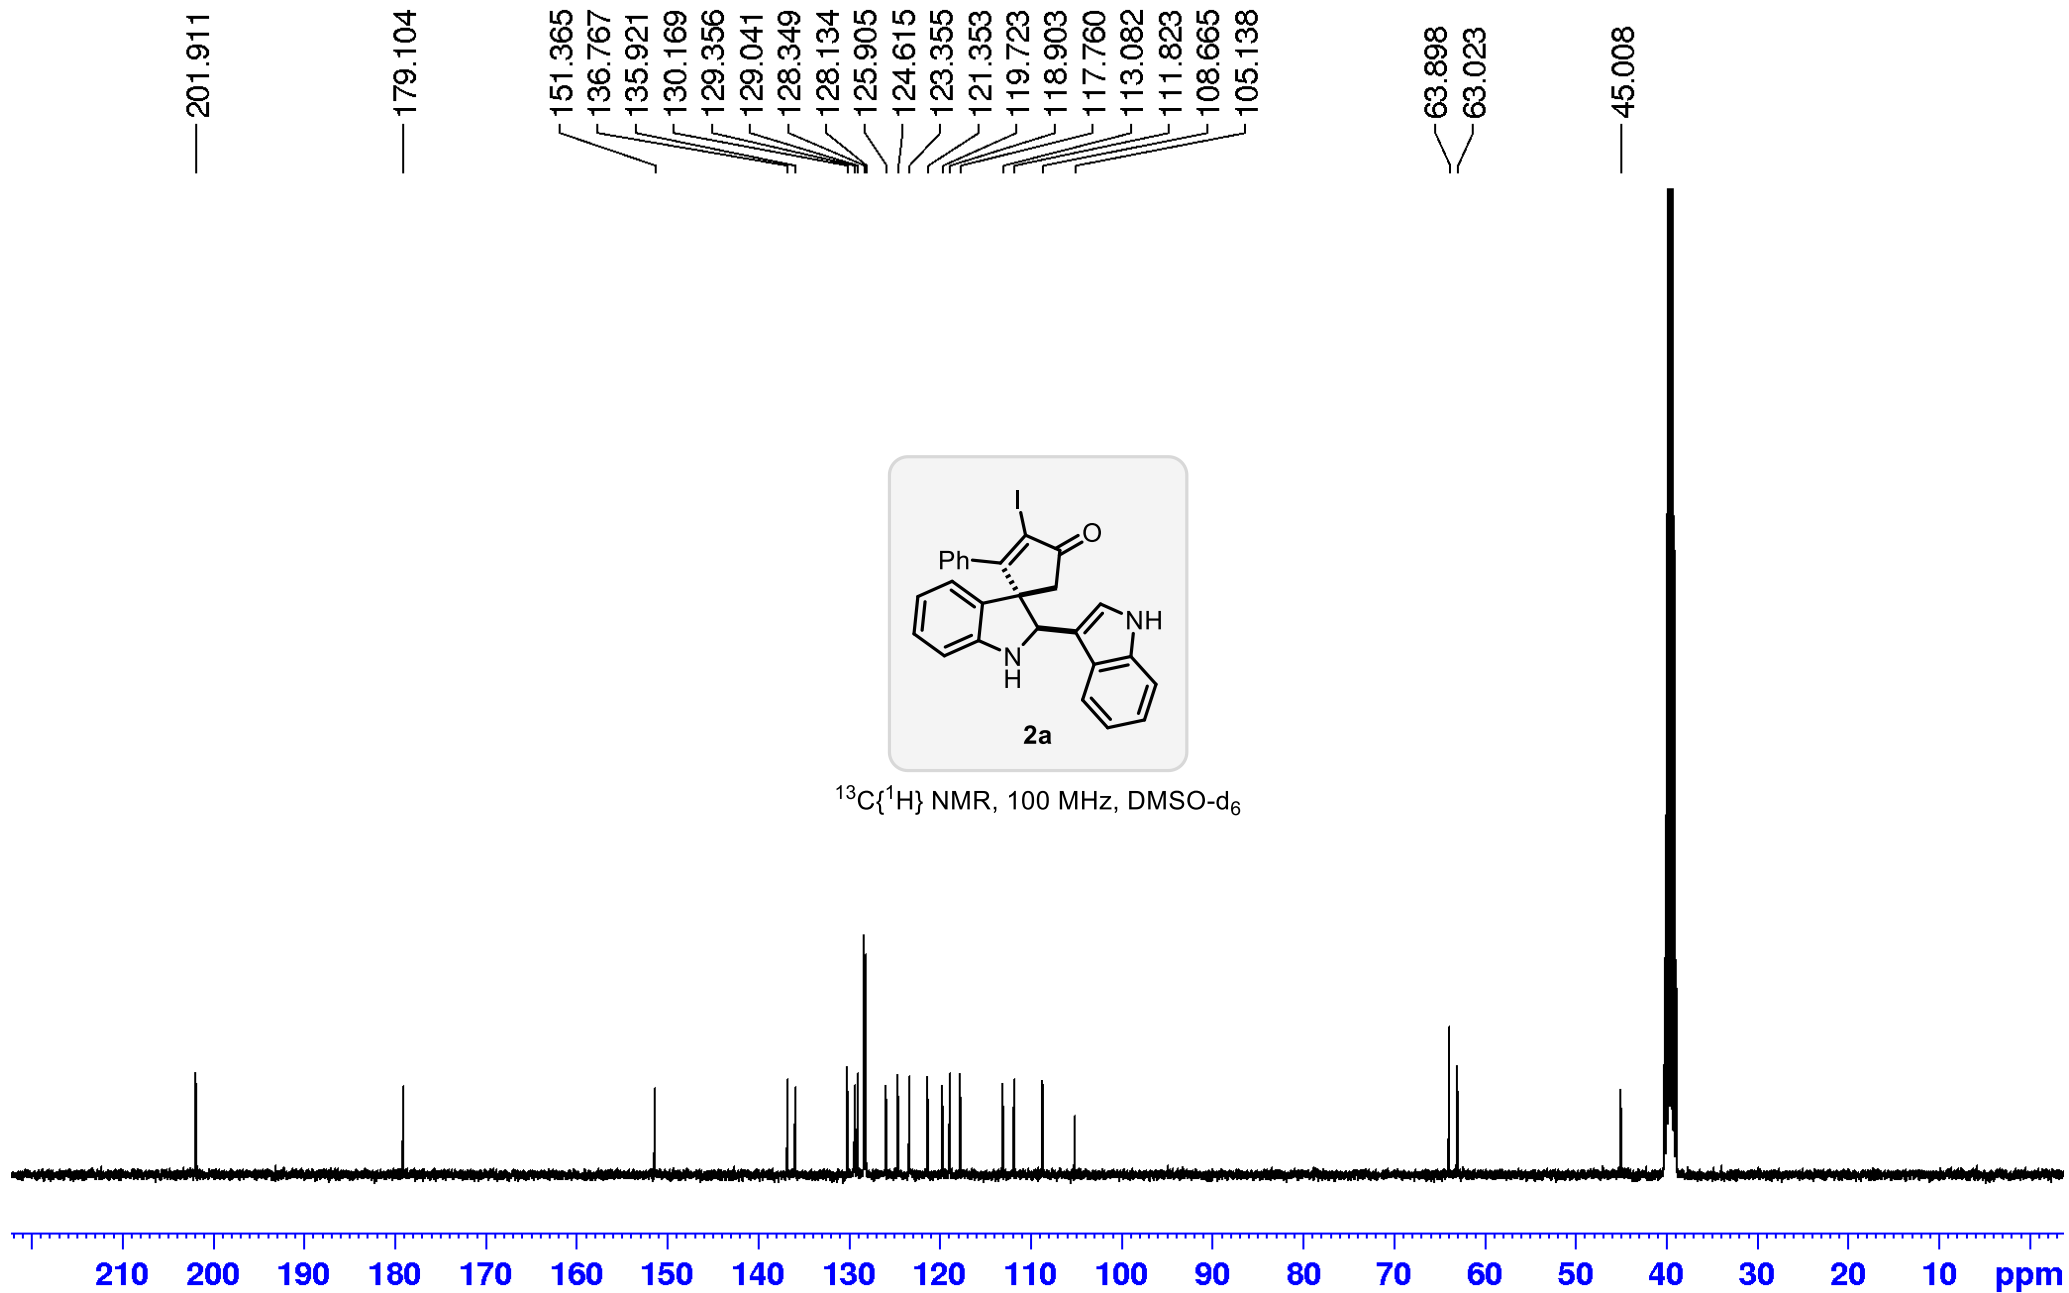

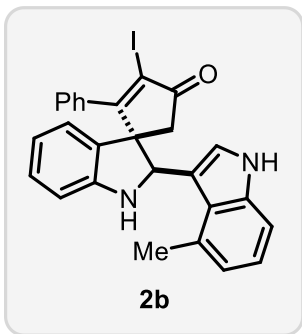

<sup>1</sup>H NMR, 400 MHz, DMSO-d<sub>6</sub>

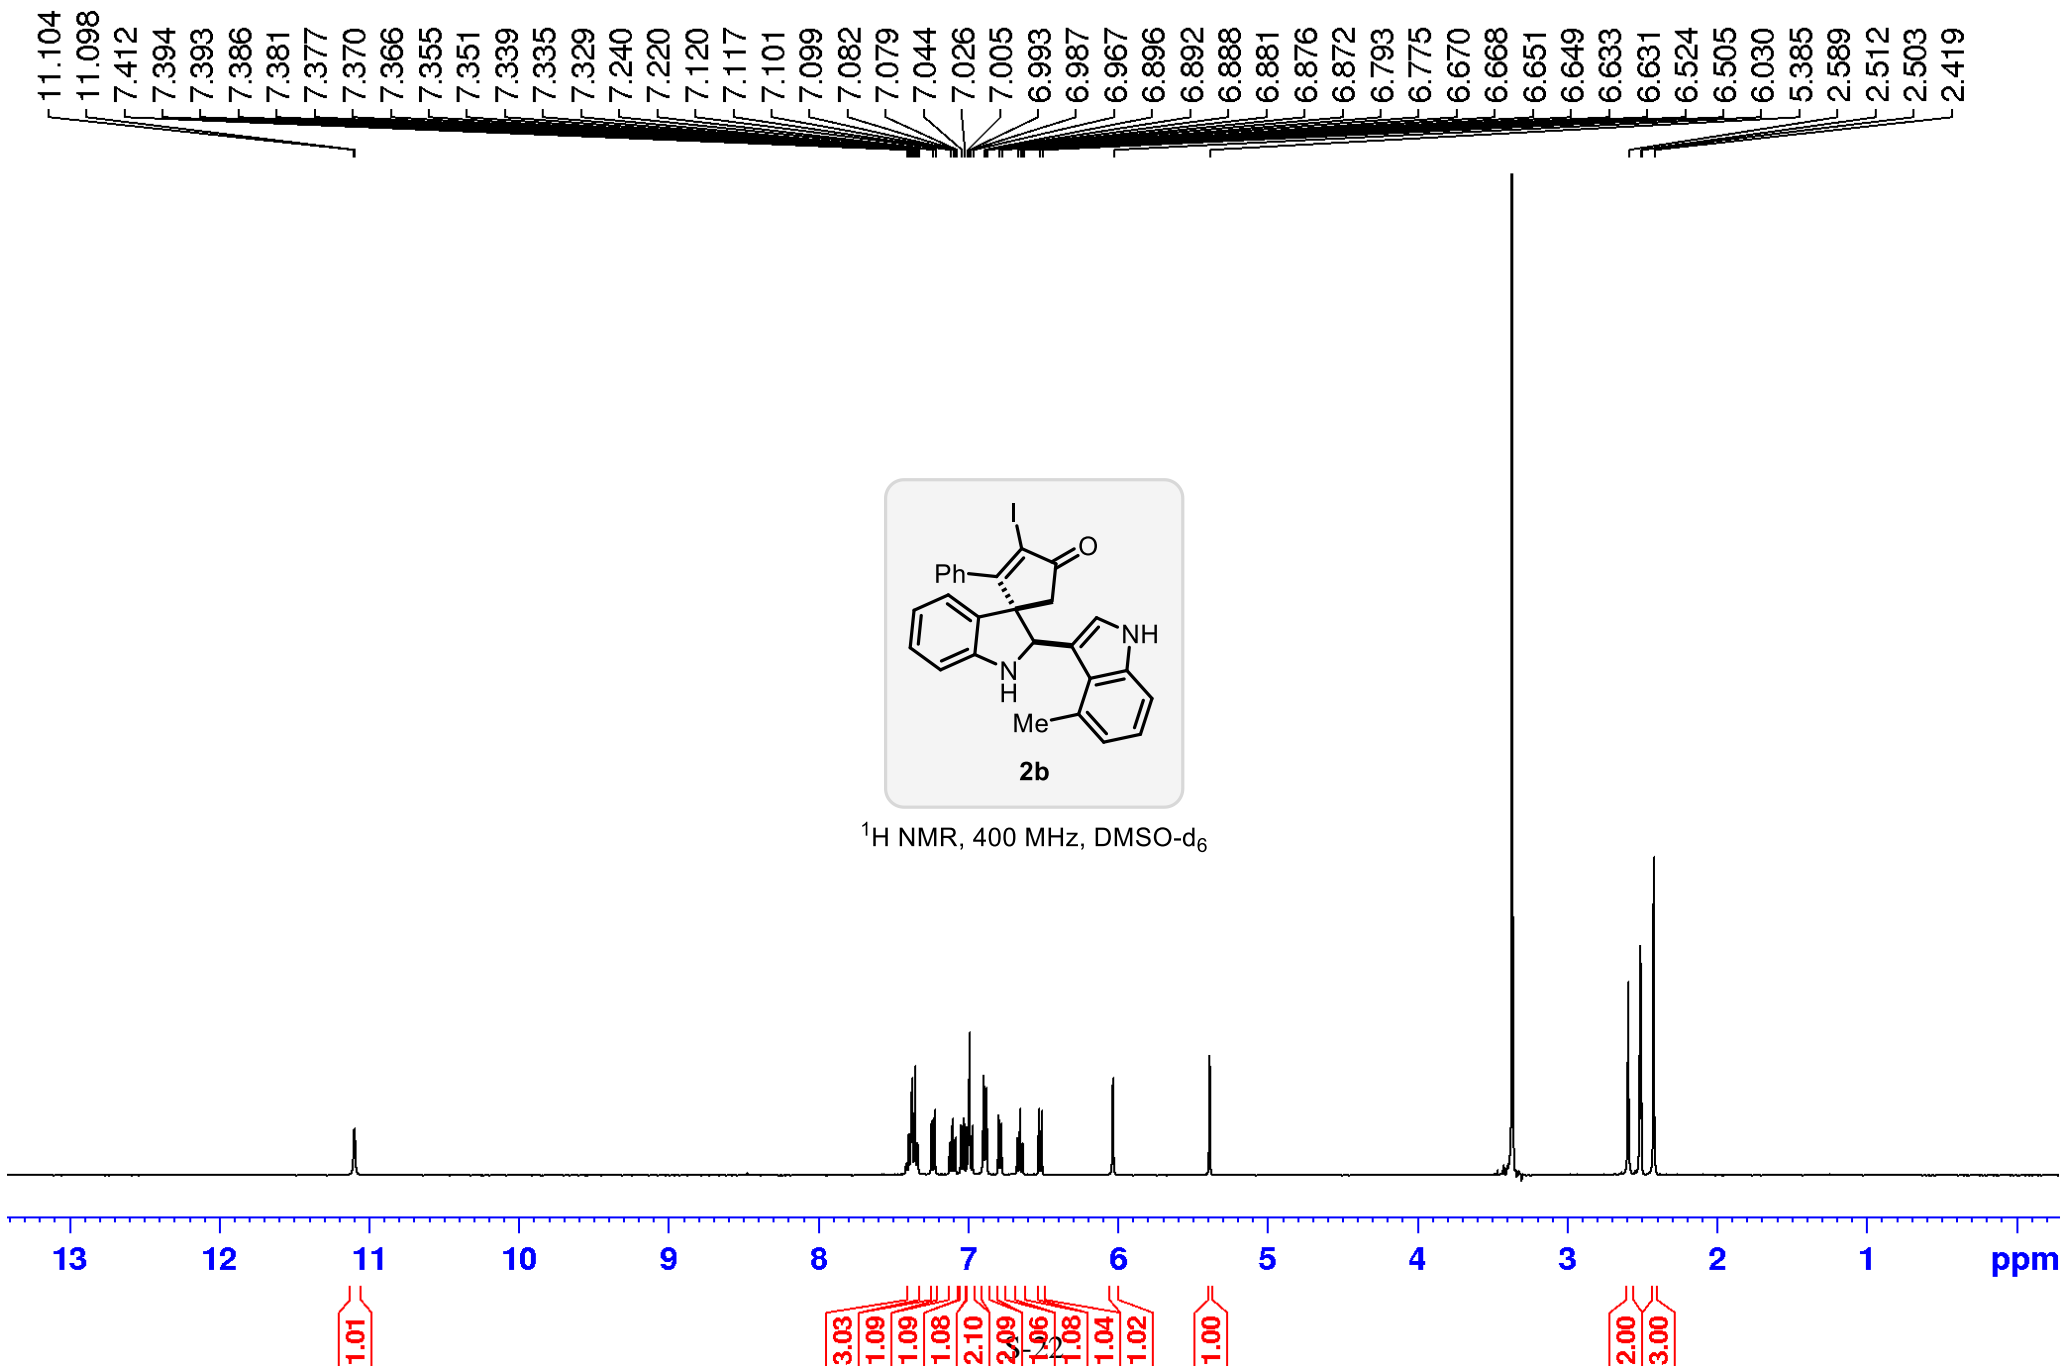

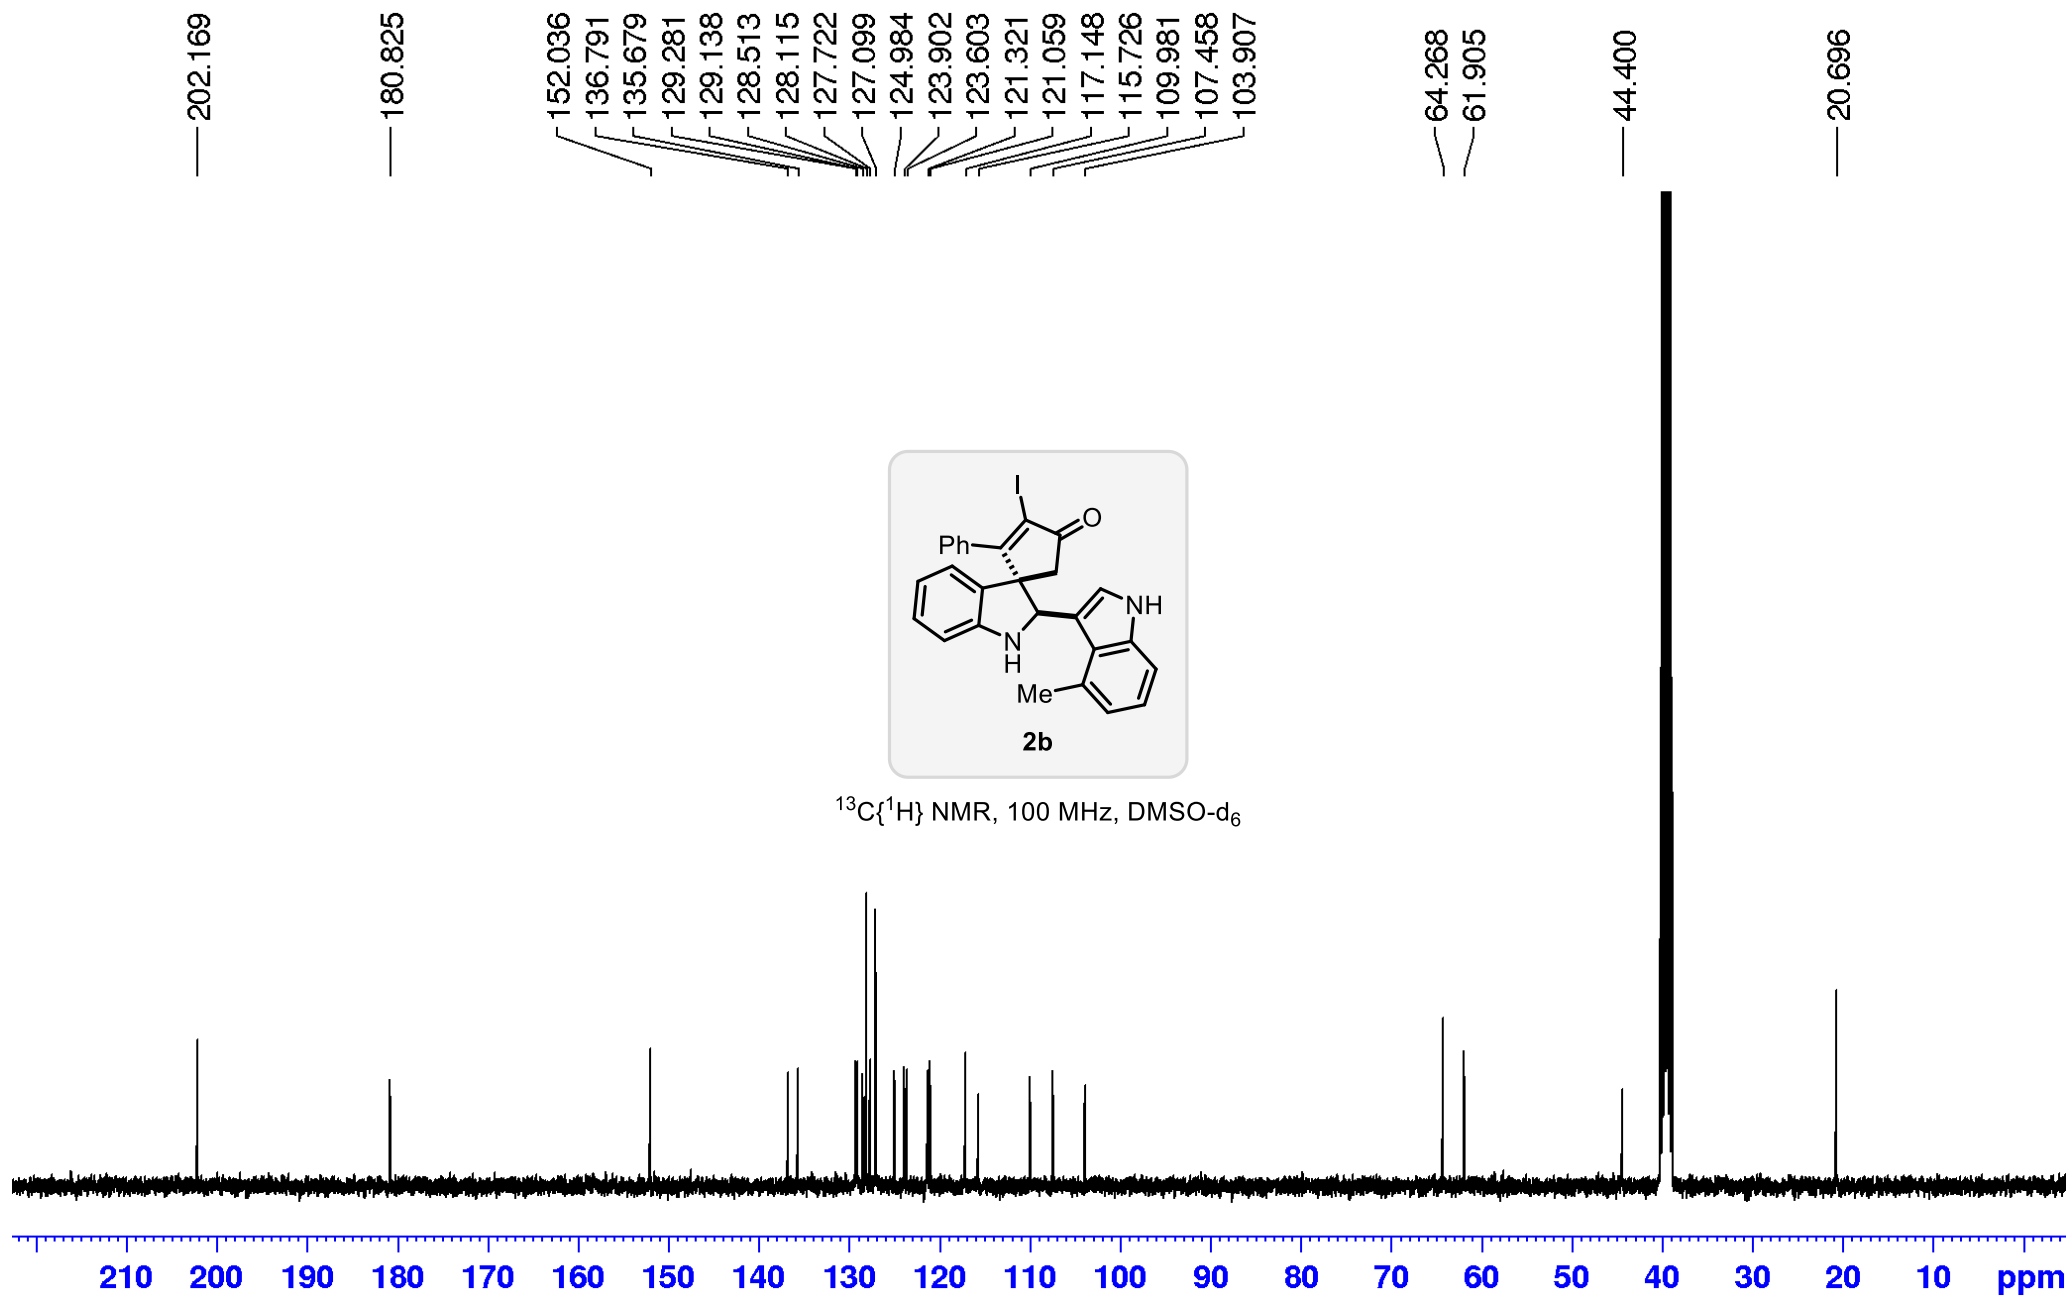

11.034  
11.029  
7.385  
7.382  
7.367  
7.366  
7.360  
7.354  
7.350  
7.344  
7.325  
7.313  
7.309  
7.303  
7.080  
7.077  
7.061  
7.058  
7.047  
7.043  
7.039  
7.035  
7.029  
7.014  
6.996  
6.982  
6.980  
6.962  
6.959  
6.885  
6.879  
6.870  
6.867  
6.850  
6.846  
6.630  
6.627  
6.611  
6.609  
6.593  
6.590  
6.485  
6.477  
6.475  
6.466  
6.459  
6.456  
5.882  
5.424  
3.686  
2.694  
2.647  
2.554

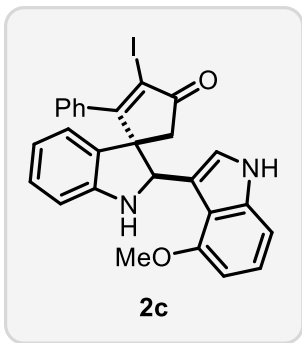

<sup>1</sup>H NMR, 400 MHz, DMSO-d<sub>6</sub>

13 12 11 10 9 8 7 6 5 4 3 2 1 ppm

0.98

3.05

4.10

3.05

1.04

2.92

1.00

1.01

3.04

1.01

1.02



— 202.348

— 180.951

153.286  
152.270  
138.022  
136.005  
129.130  
128.926  
127.990  
127.812  
127.077  
123.996  
122.425  
121.582  
116.856  
116.389  
115.193  
107.392  
105.298  
103.465  
99.160

63.778  
62.353

— 55.262

— 43.452

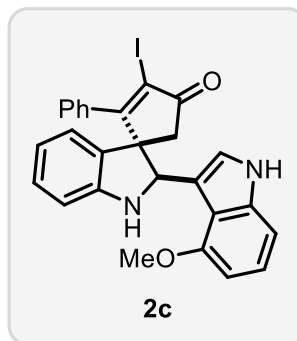

$^{13}\text{C}\{^1\text{H}\}$  NMR, 100 MHz, DMSO- $d_6$

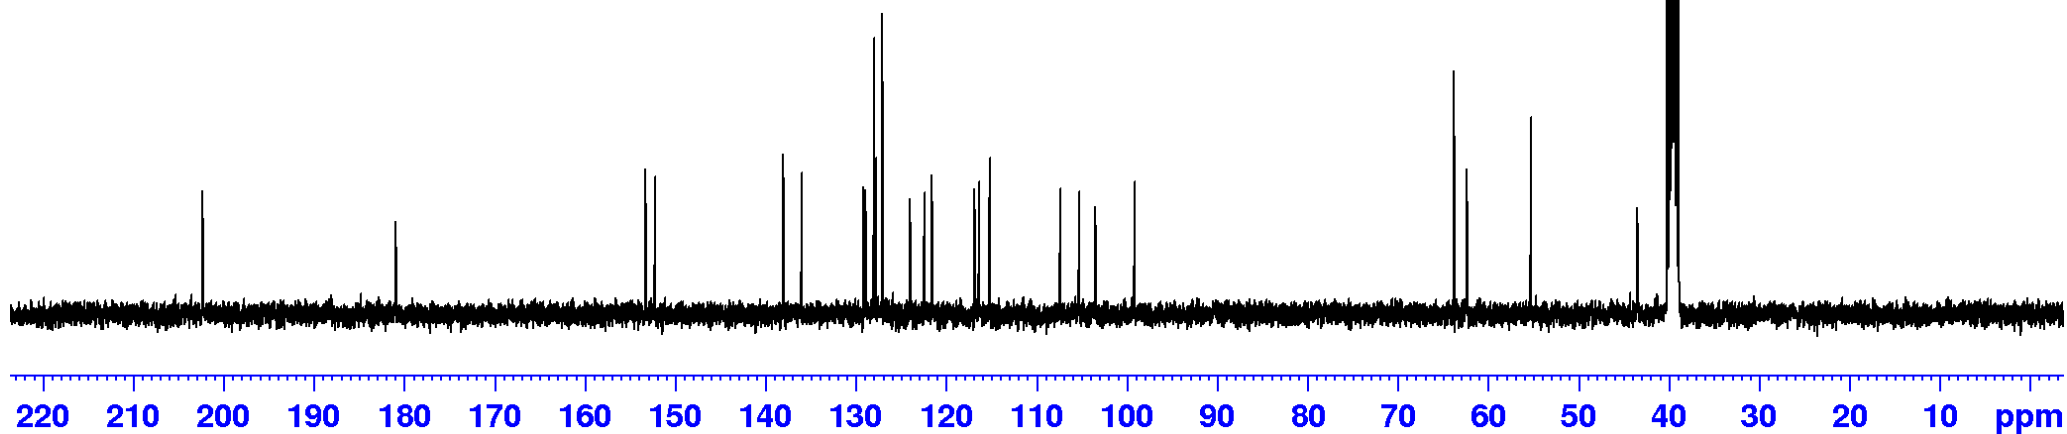

S-25

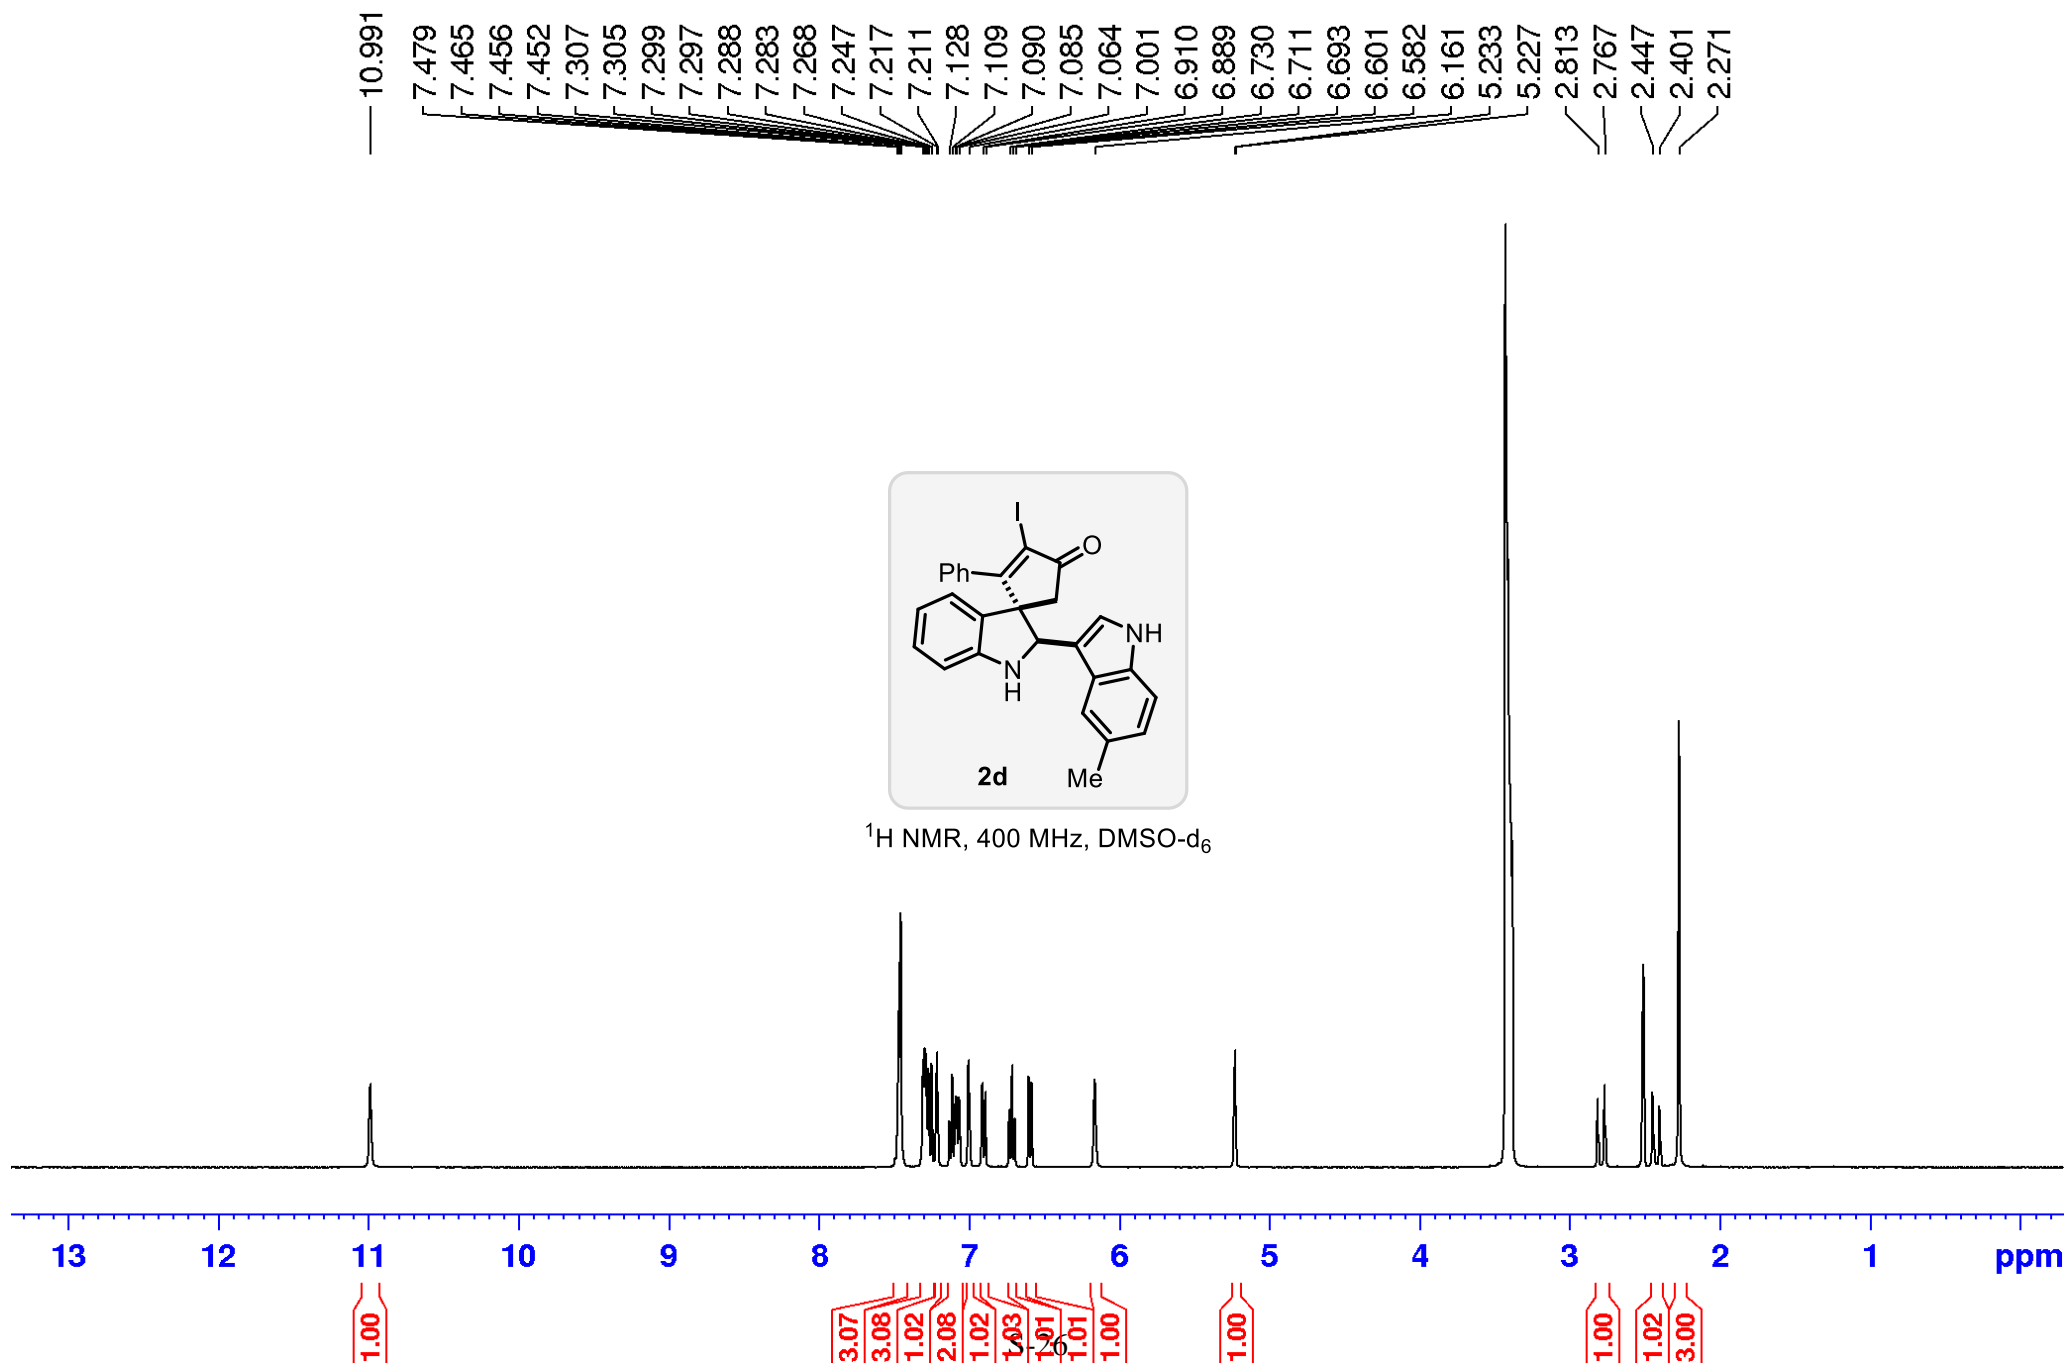

— 201.862

— 178.498

151.211  
135.889  
135.058  
130.670  
129.473  
128.916  
128.391  
127.198  
126.252  
124.566  
123.284  
122.952  
119.264  
117.905  
112.163  
111.484  
108.914  
105.439

64.034  
63.052

— 45.107

— 21.356

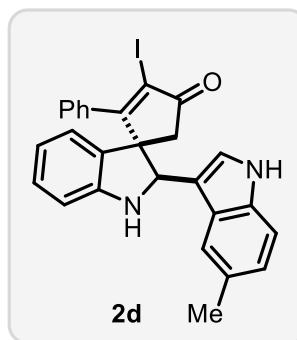

$^{13}\text{C}\{^1\text{H}\}$  NMR, 100 MHz, DMSO- $d_6$

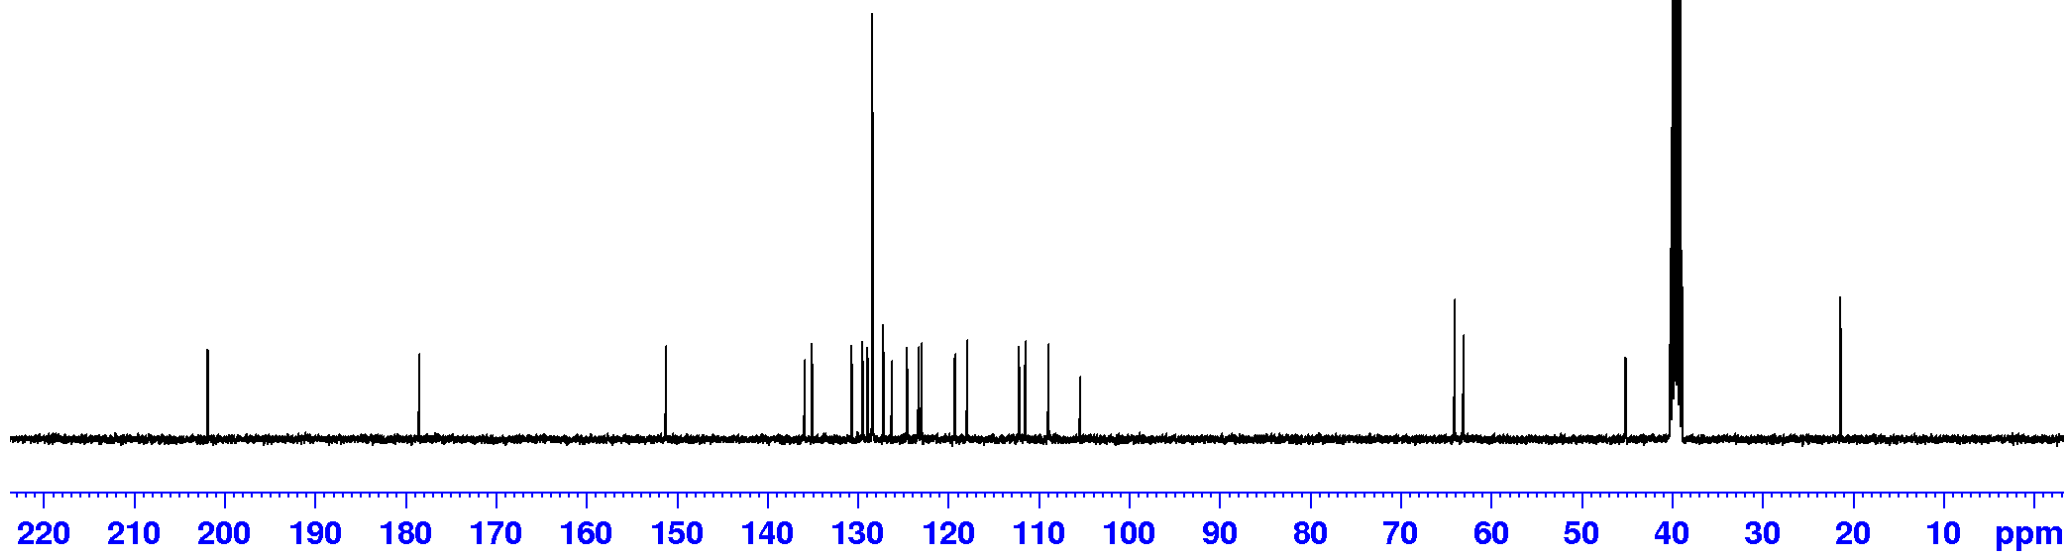

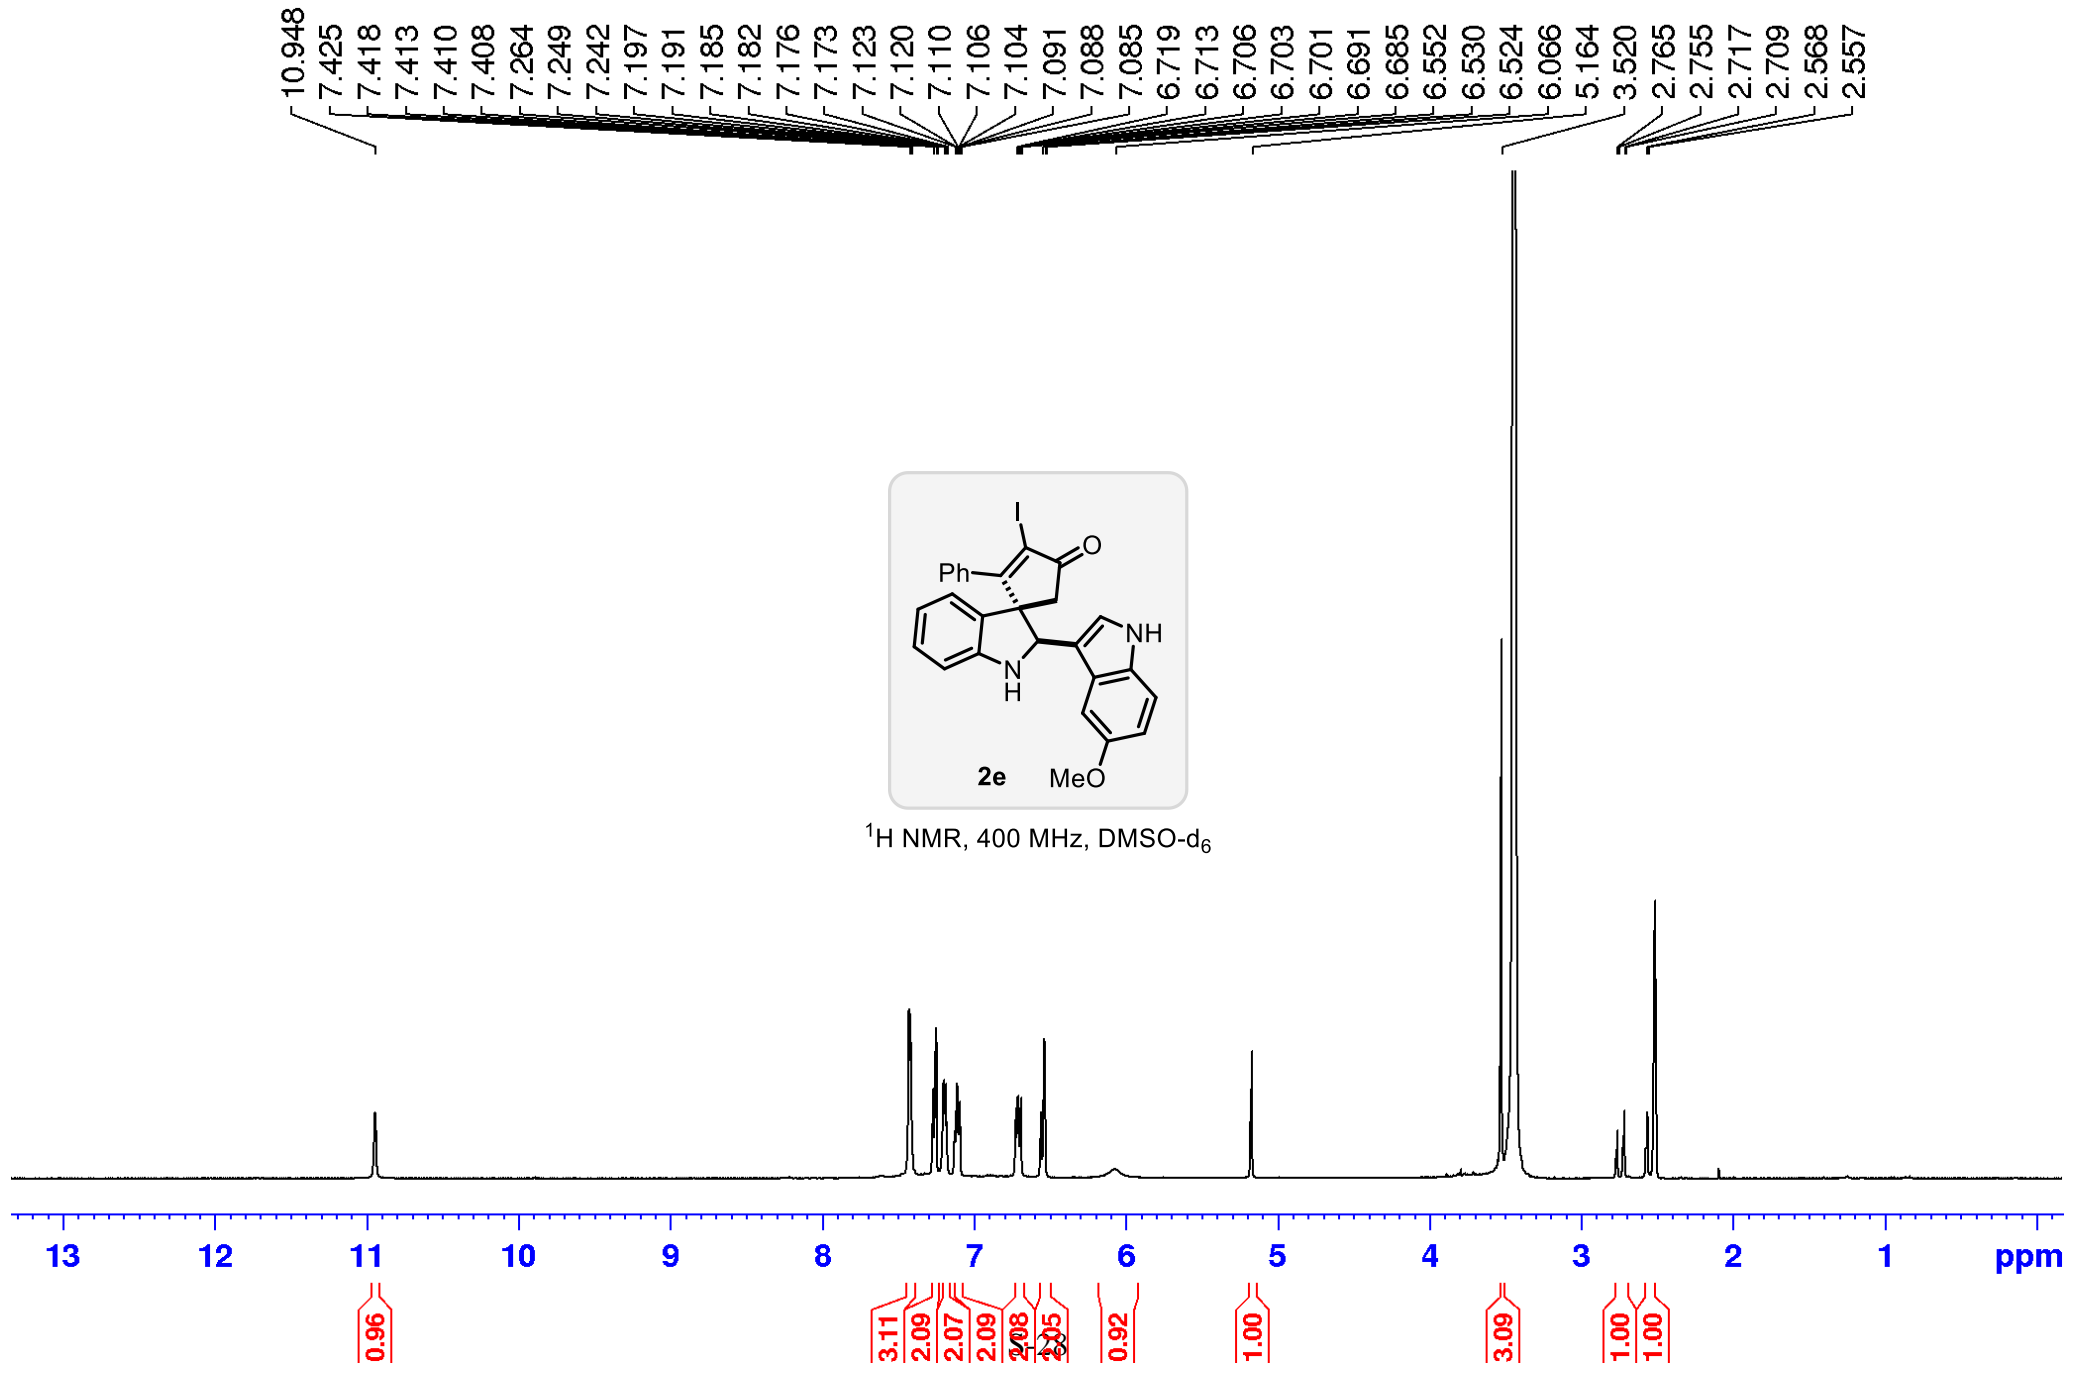

— 202.031

— 179.566

153.133  
151.604  
135.890  
131.935  
130.052  
129.313  
129.090  
128.282  
127.929  
125.926  
125.282  
123.200  
117.692  
113.583  
112.461  
111.560  
108.529  
104.829  
101.327

63.577  
63.165

— 55.070

— 44.751

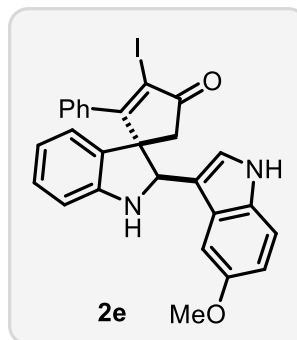

$^{13}\text{C}\{^1\text{H}\}$  NMR, 100 MHz, DMSO- $d_6$

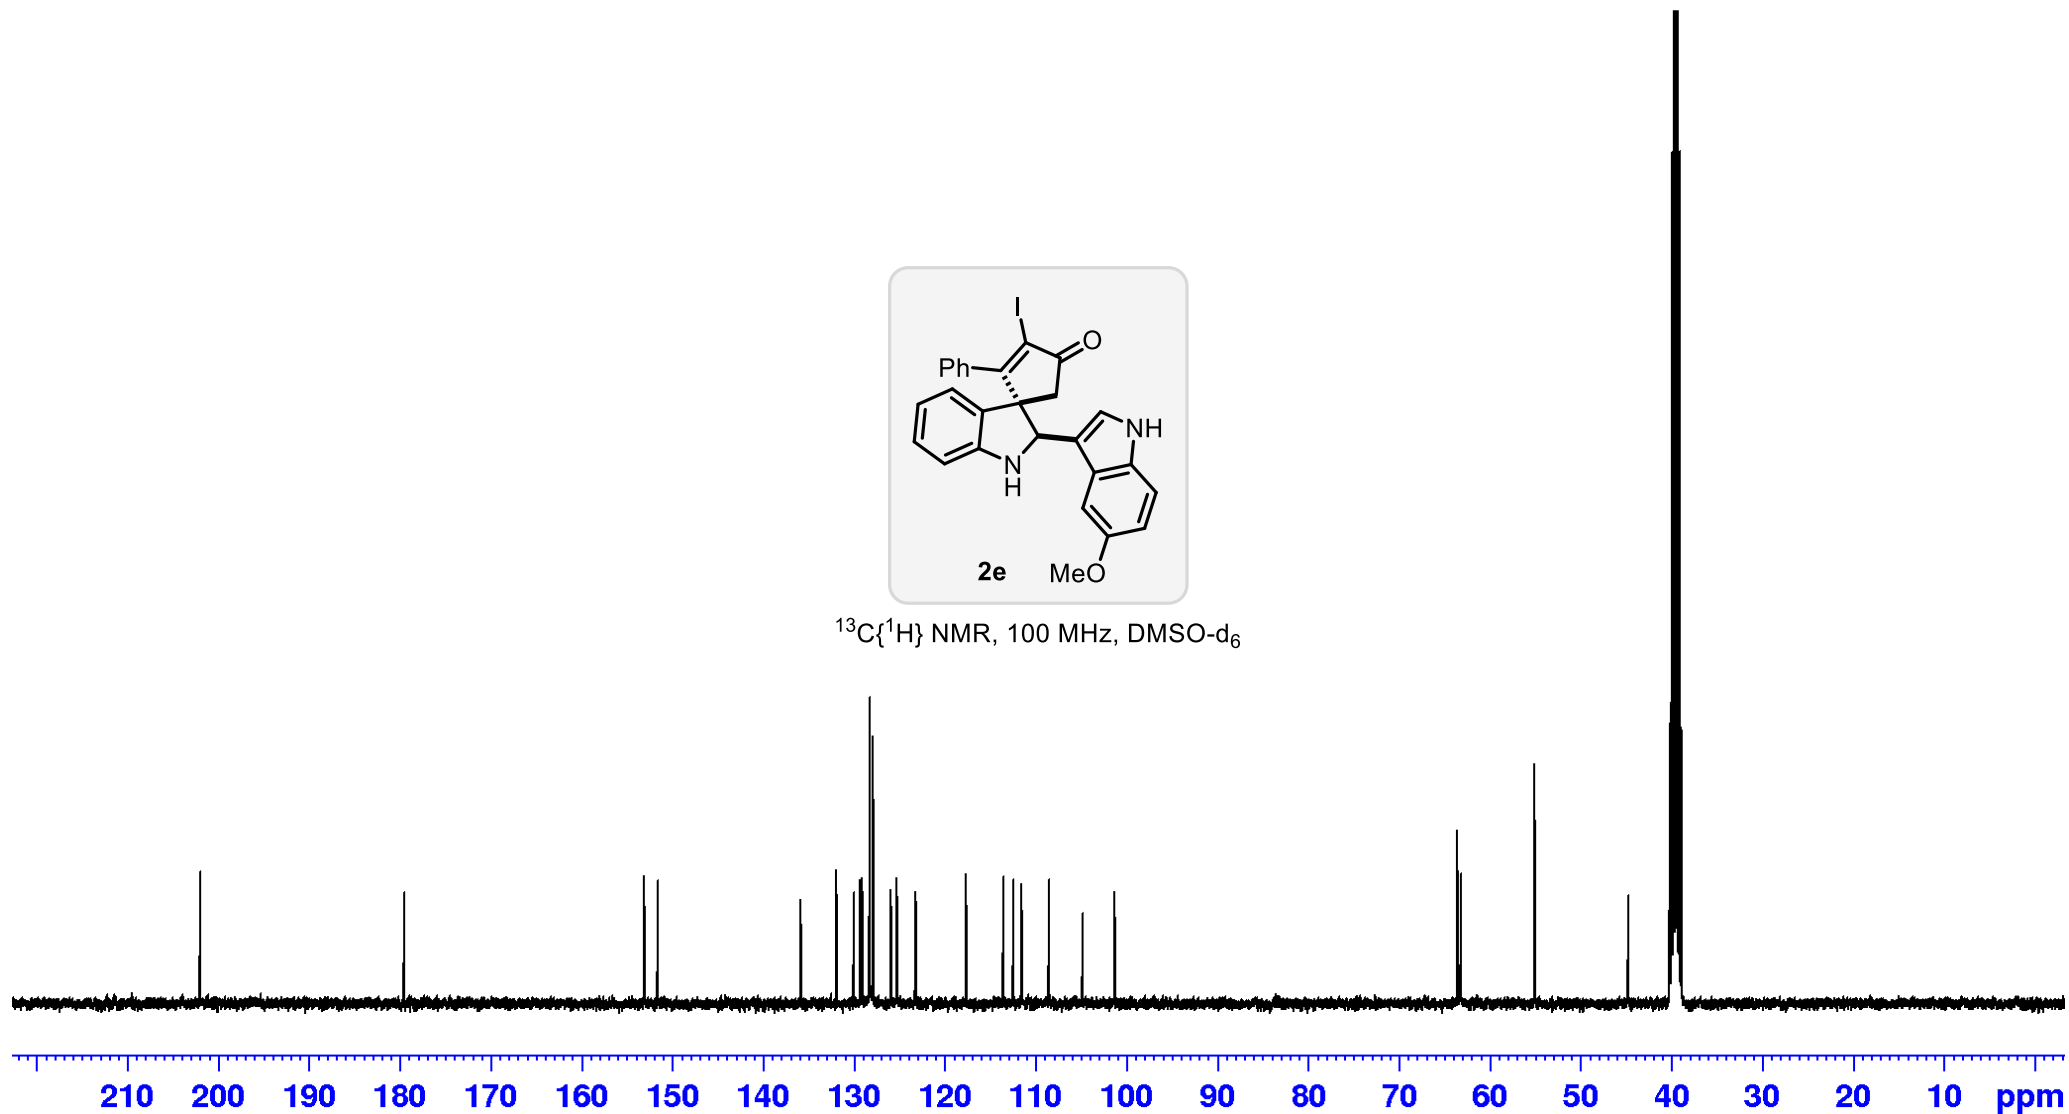

10.804  
10.799  
8.671  
7.450  
7.442  
7.432  
7.425  
7.416  
7.239  
7.230  
7.221  
7.215  
7.170  
7.149  
7.114  
7.111  
7.092  
7.081  
7.074  
7.063  
6.752  
6.747  
6.715  
6.713  
6.696  
6.695  
6.678  
6.676  
6.616  
6.611  
6.595  
6.589  
6.568  
6.556  
6.549  
6.111  
6.105  
5.105  
5.099  
3.477  
3.464  
2.830  
2.784  
2.431  
2.385

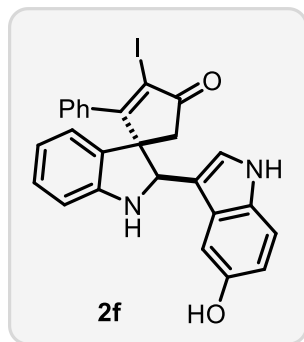

<sup>1</sup>H NMR, 400 MHz, DMSO-d<sub>6</sub>

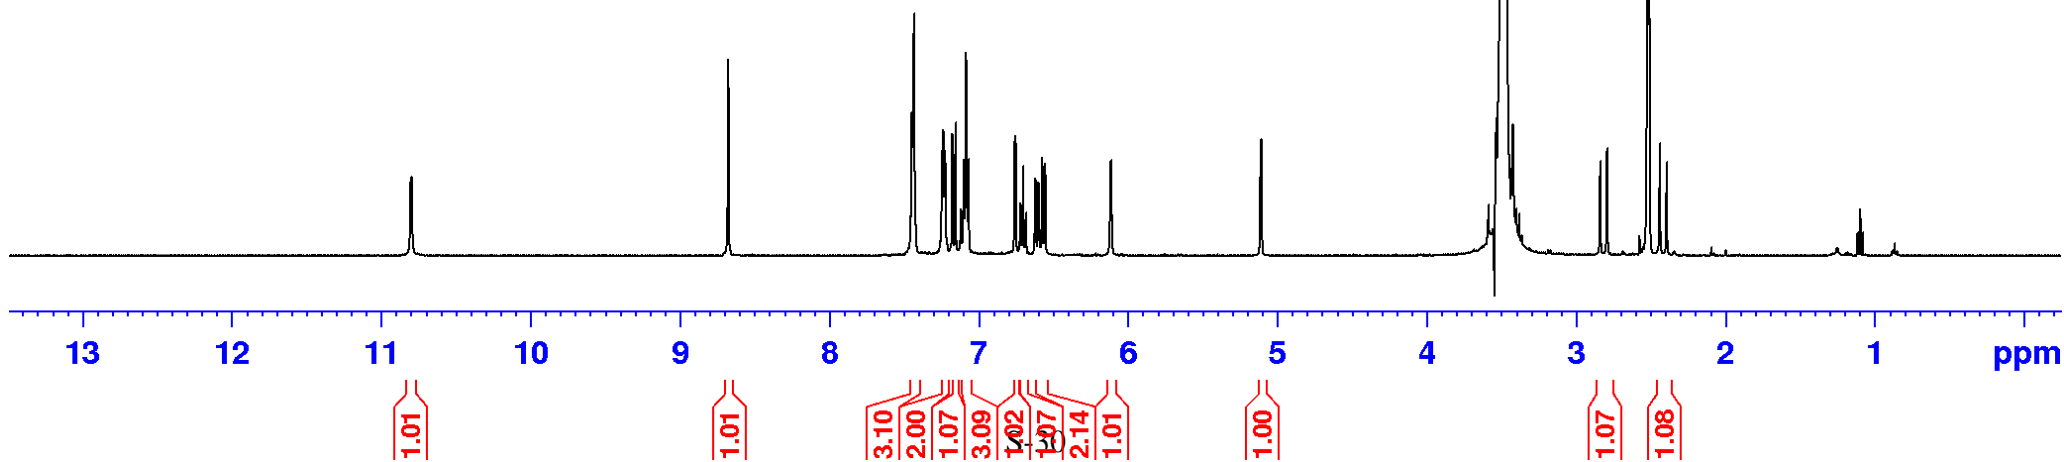

— 202.084

— 179.129

151.322  
150.511  
136.111  
131.337  
130.312  
129.437  
129.044  
128.505  
128.280  
126.969  
124.833  
123.530  
117.812  
112.157  
111.881  
111.634  
108.858  
105.240  
104.051

64.391  
63.196

— 45.339

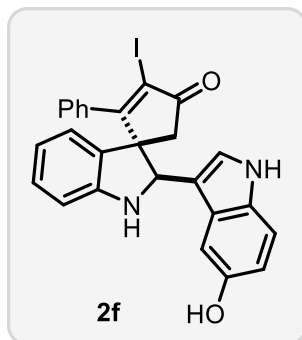

$^{13}\text{C}\{^1\text{H}\}$  NMR, 100 MHz, DMSO- $d_6$

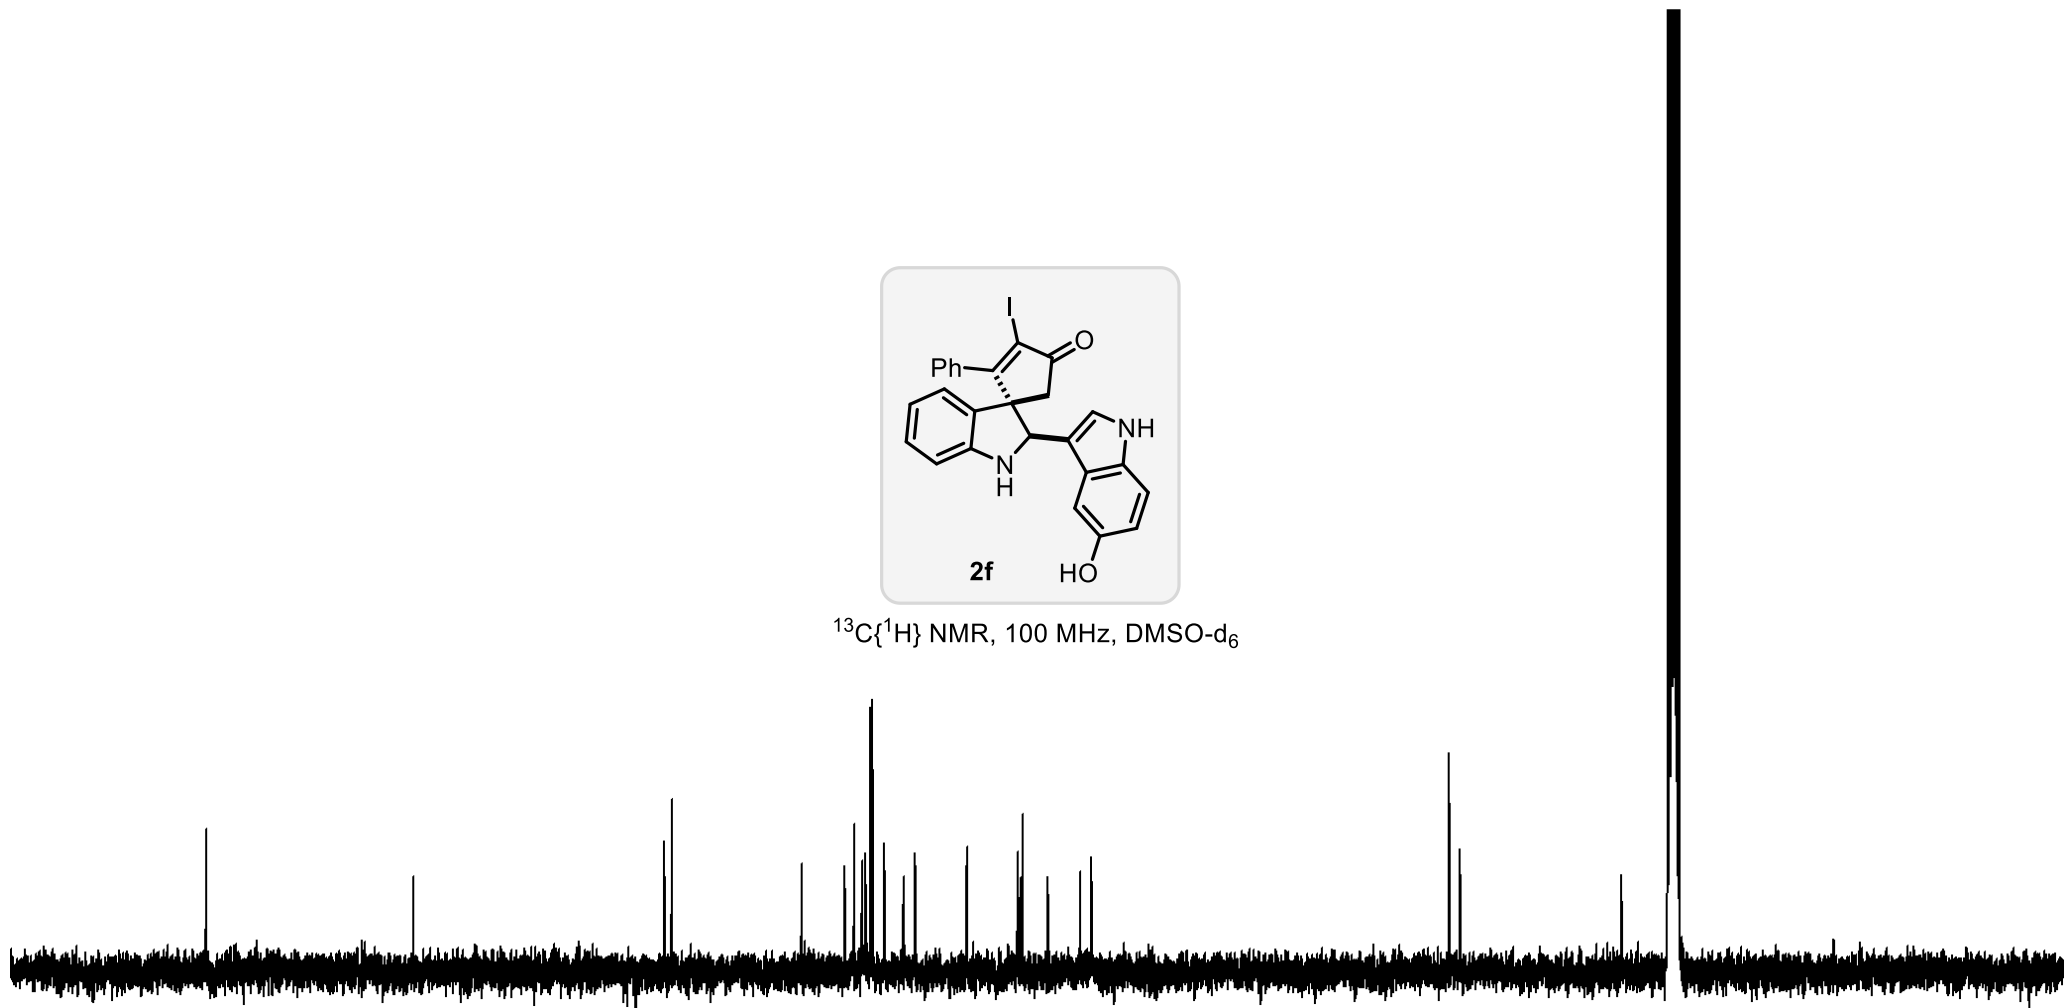

220 210 200 190 180 170 160 150 140 130 120 110 100 90 80 70 60 50 40 30 20 10 ppm

S-31

11.238  
11.233  
7.442  
7.438  
7.433  
7.430  
7.427  
7.422  
7.417  
7.393  
7.381  
7.371  
7.359  
7.352  
7.346  
7.223  
7.219  
7.216  
7.213  
7.209  
7.206  
7.203  
7.199  
7.140  
7.137  
7.119  
7.101  
6.944  
6.928  
6.921  
6.899  
6.858  
6.852  
6.832  
6.826  
6.742  
6.740  
6.723  
6.721  
6.705  
6.702  
6.576  
6.574  
6.556  
6.553  
6.144  
6.139  
5.170  
5.165  
2.712  
2.666  
2.524  
2.478

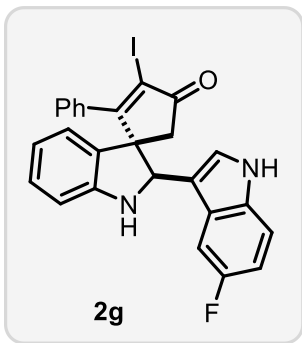

<sup>1</sup>H NMR, 400 MHz, DMSO-d<sub>6</sub>

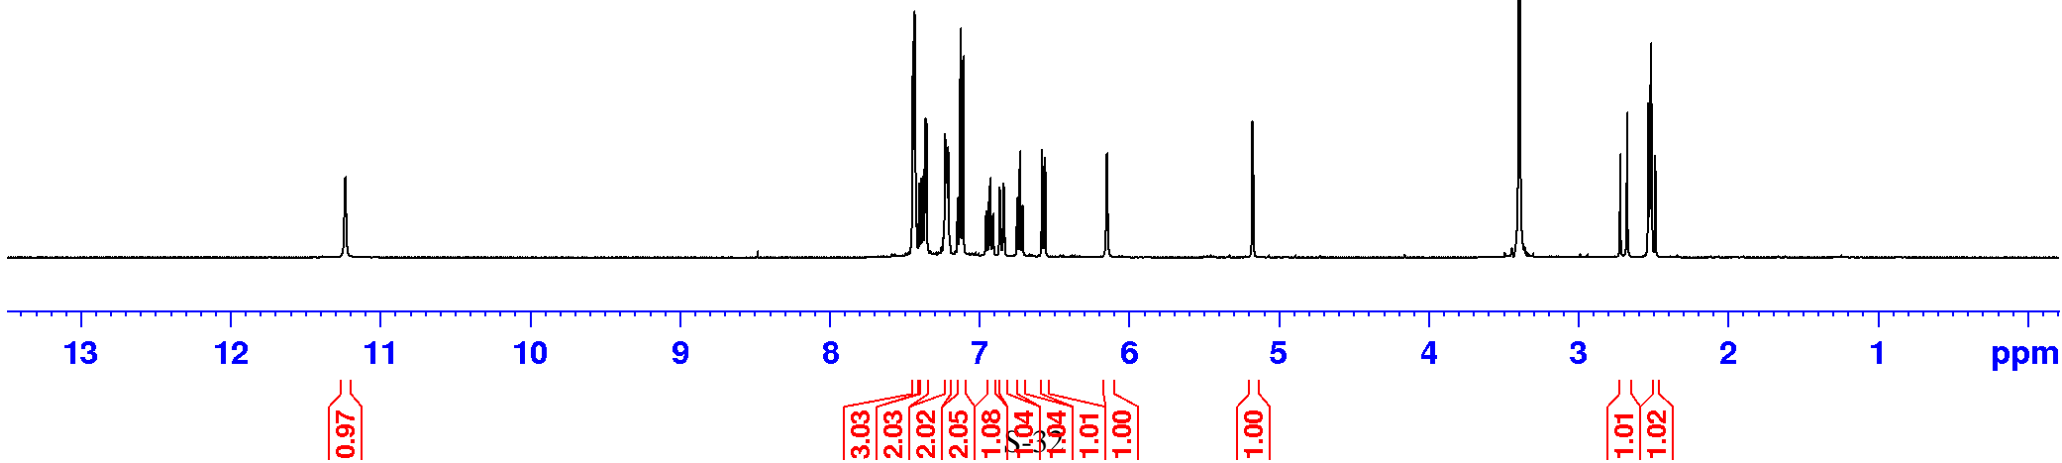



-124.544  
-124.558  
-124.570  
-124.584  
-124.596

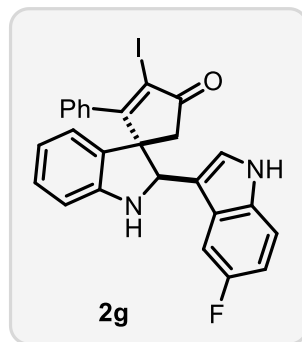

<sup>19</sup>F NMR, 376 MHz, DMSO-d<sub>6</sub>

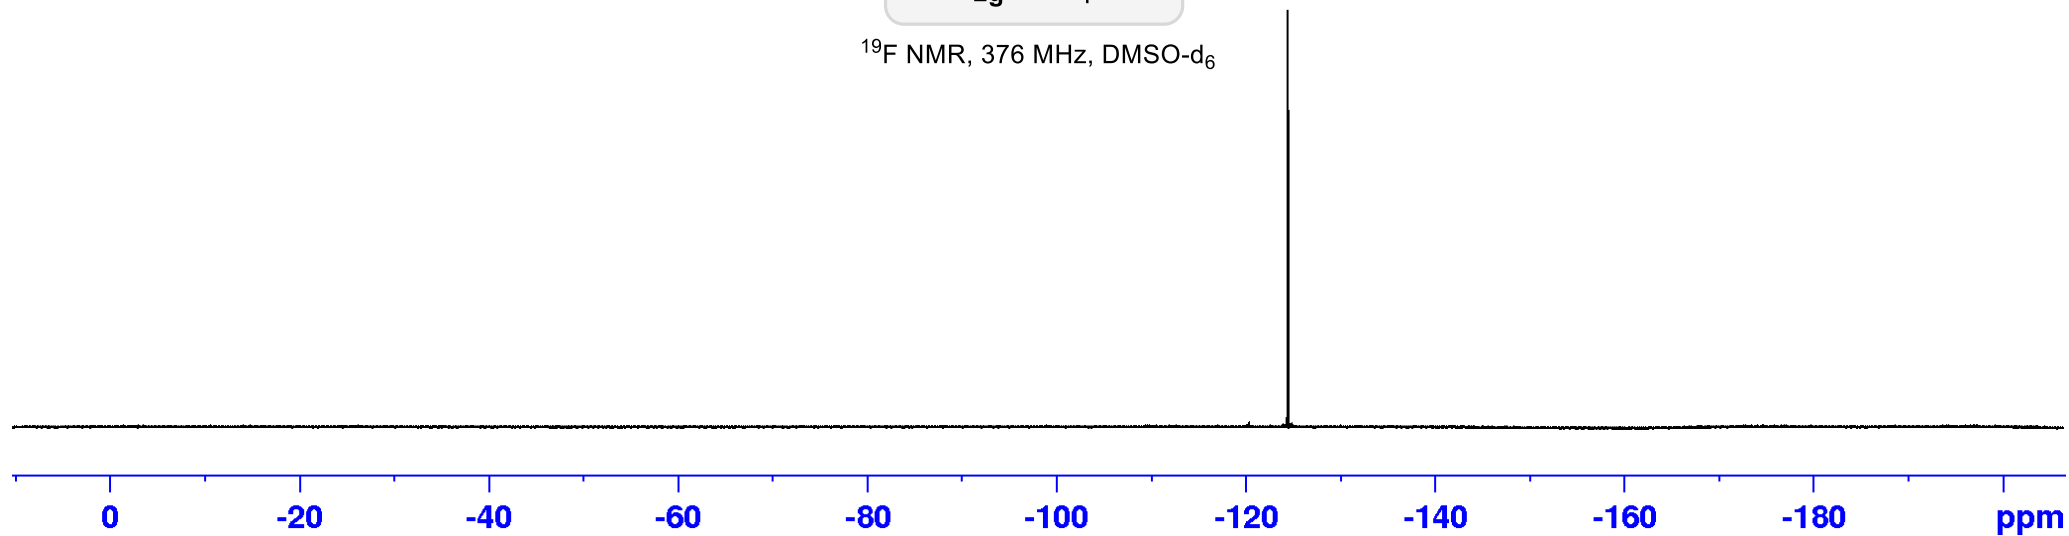

S-33

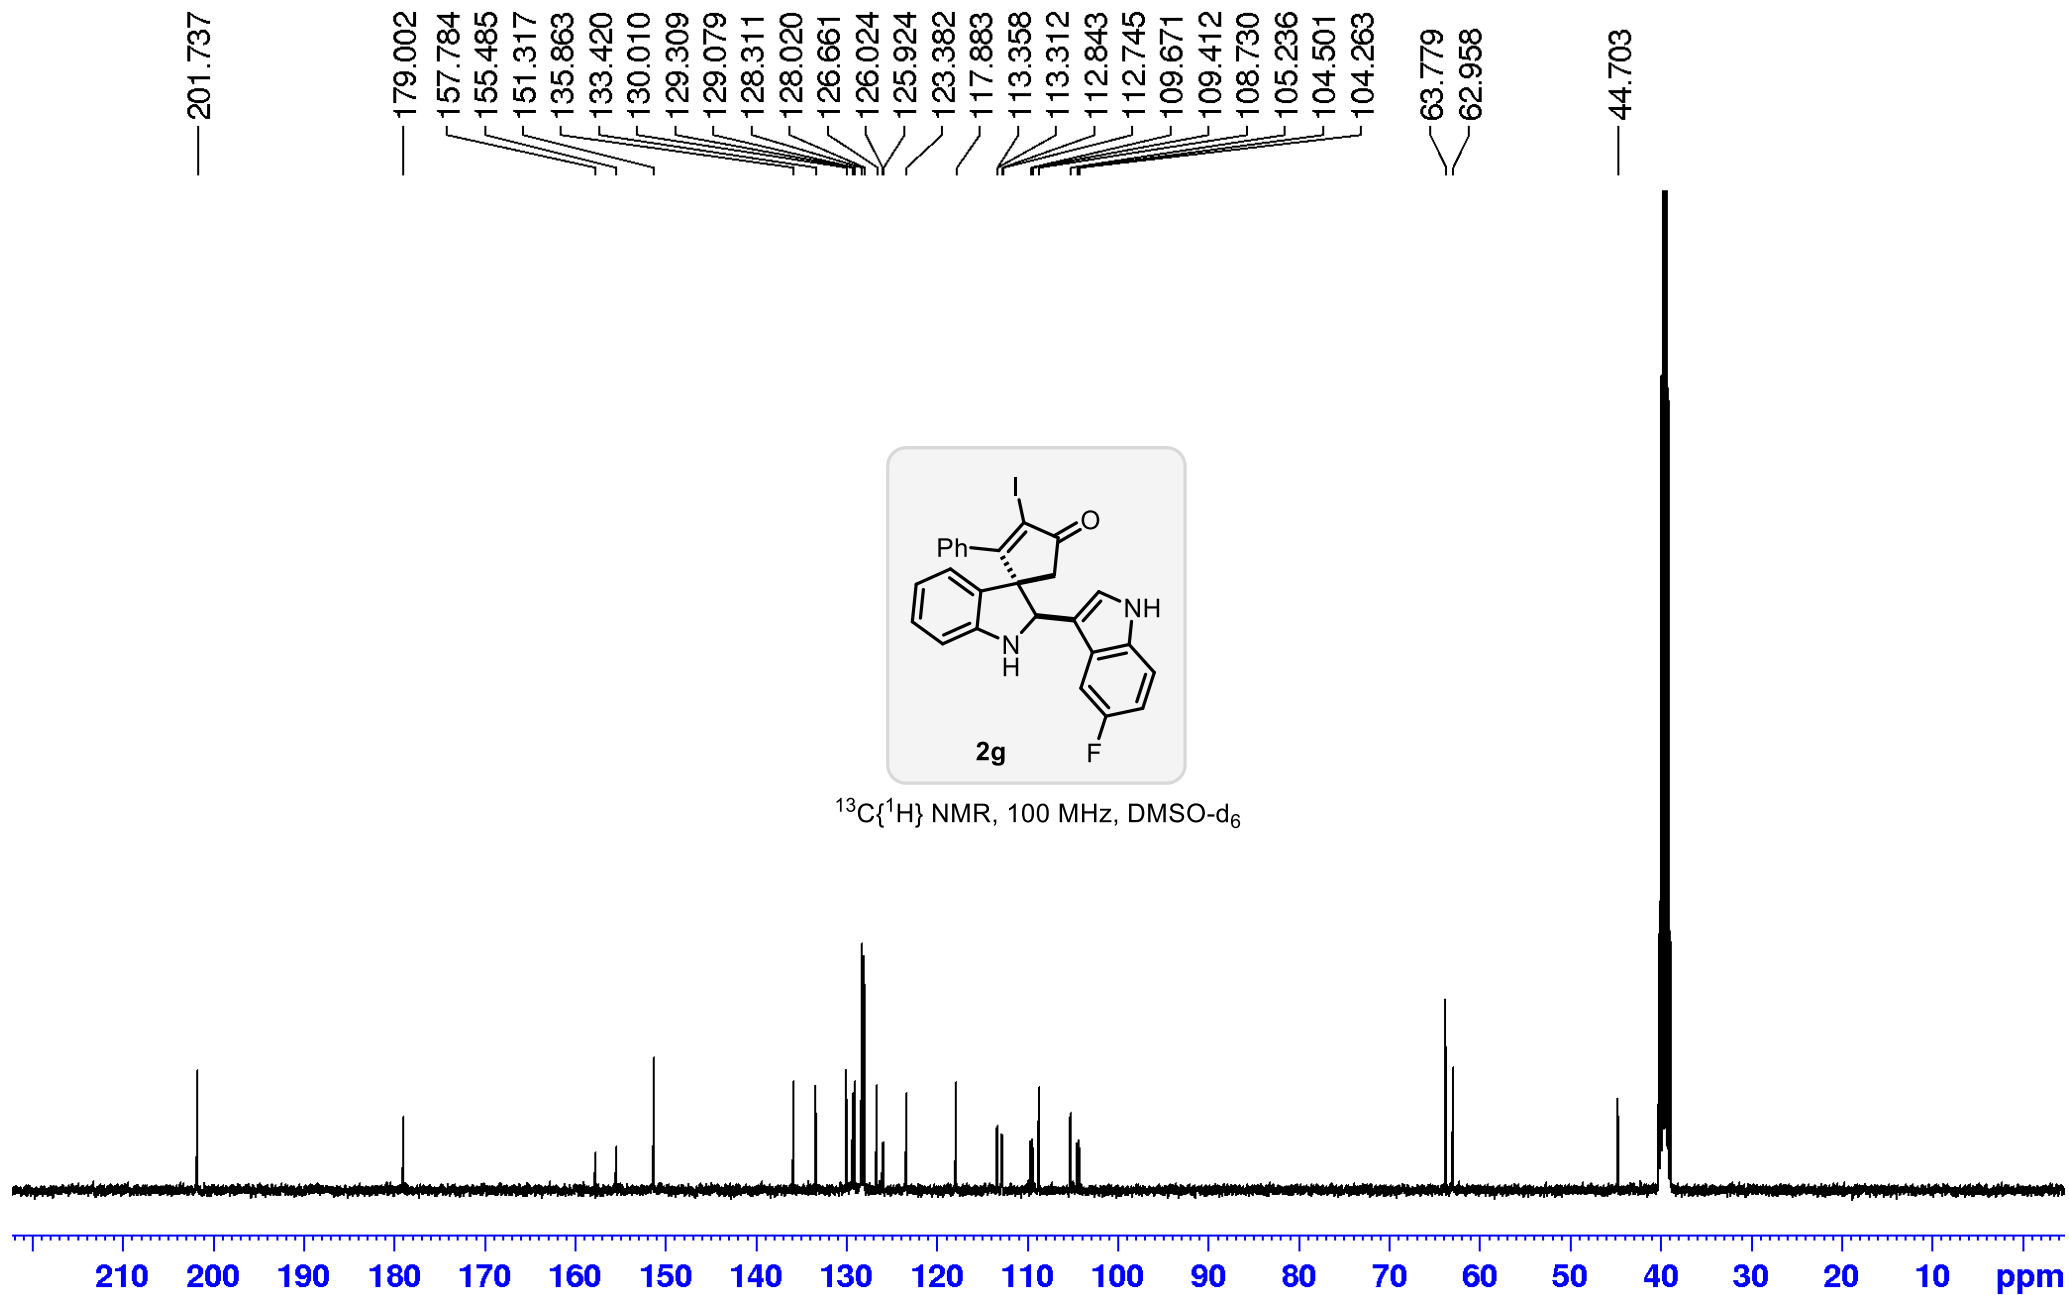

11.354  
 11.349  
 7.462  
 7.456  
 7.446  
 7.439  
 7.430  
 7.377  
 7.373  
 7.369  
 7.348  
 7.336  
 7.330  
 7.293  
 7.283  
 7.280  
 7.274  
 7.270  
 7.265  
 7.259  
 7.202  
 7.198  
 7.181  
 7.176  
 7.142  
 7.139  
 7.123  
 7.120  
 7.109  
 7.101  
 7.091  
 6.750  
 6.748  
 6.731  
 6.729  
 6.713  
 6.711  
 6.613  
 6.594  
 6.203  
 6.197  
 5.191  
 5.185  
 2.710  
 2.664  
 2.471  
 2.425

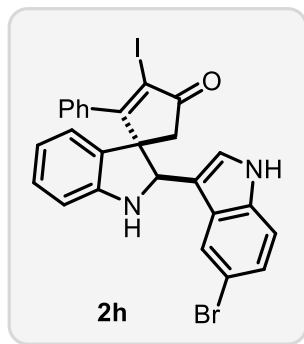

<sup>1</sup>H NMR, 400 MHz, DMSO-d<sub>6</sub>

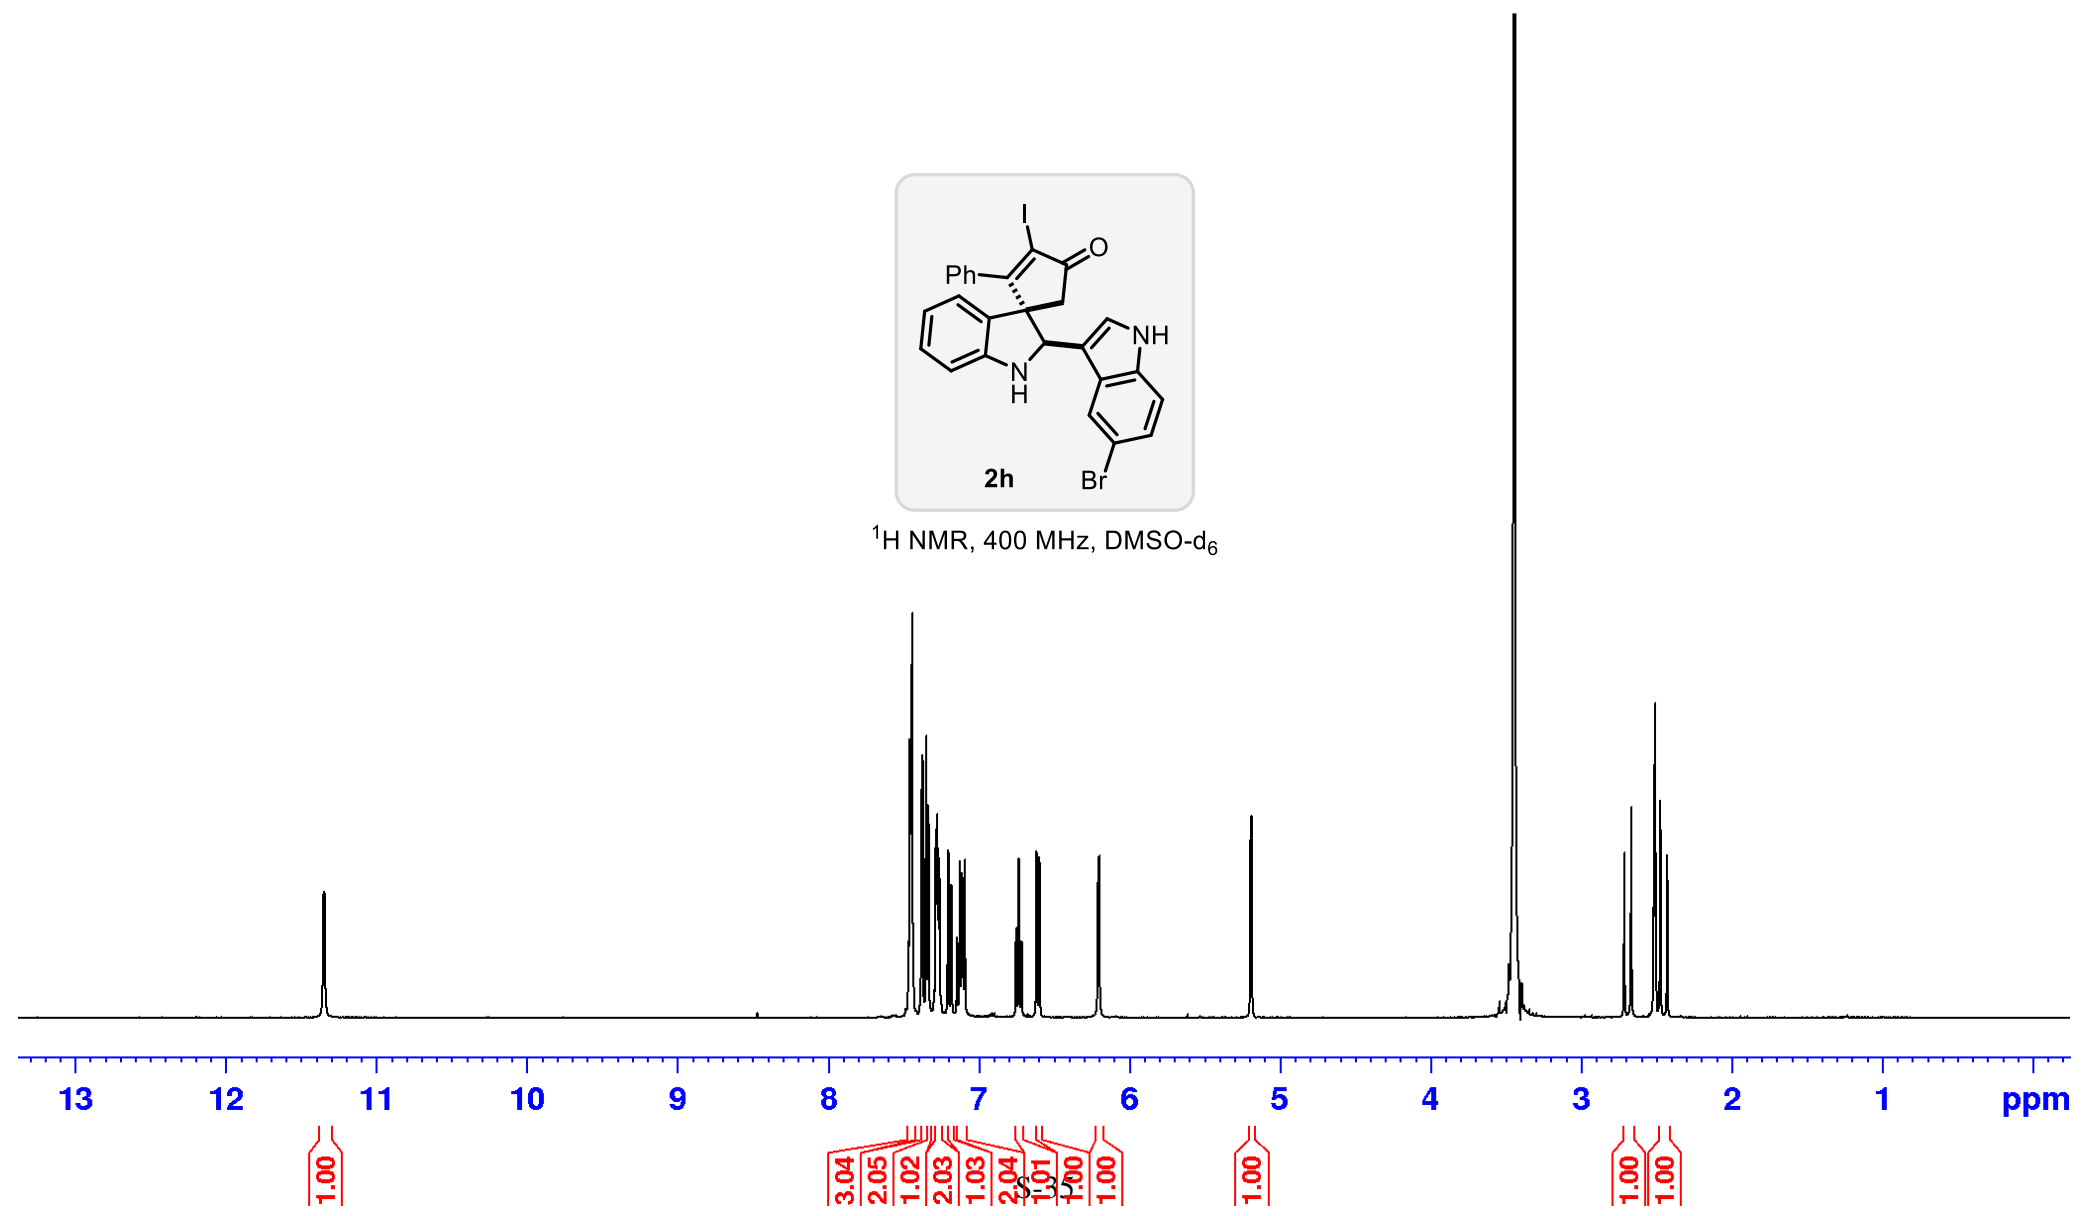

— 201.670

— 178.383

151.128  
135.817  
135.402  
130.405  
129.510  
129.079  
128.446  
128.302  
127.825  
126.230  
123.892  
123.431  
121.969  
118.180  
113.890  
112.501  
111.583  
109.062  
105.536

63.990  
62.921

— 44.898

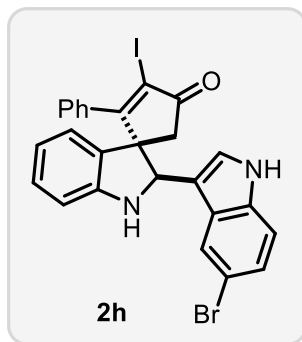

$^{13}\text{C}\{^1\text{H}\}$  NMR, 100 MHz, DMSO- $\text{d}_6$

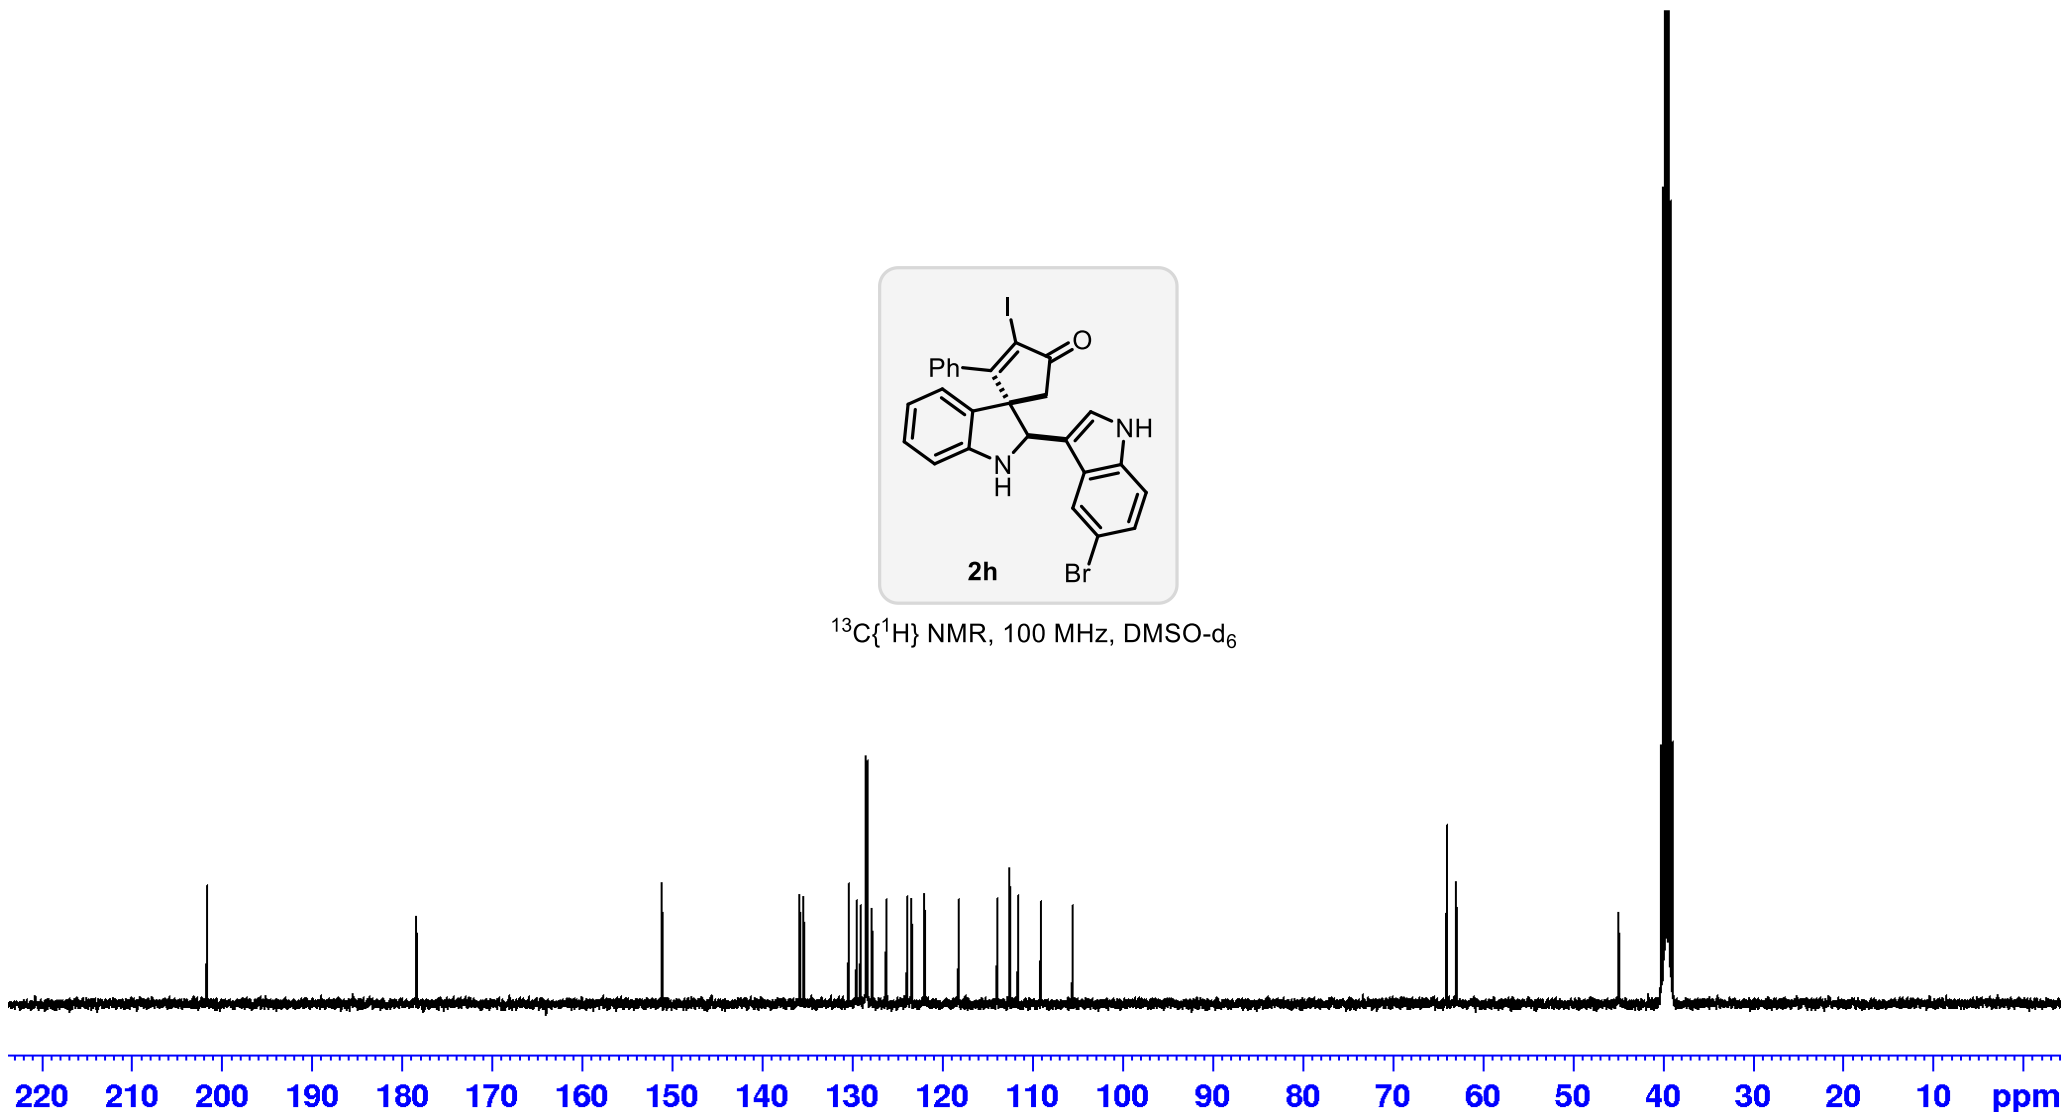

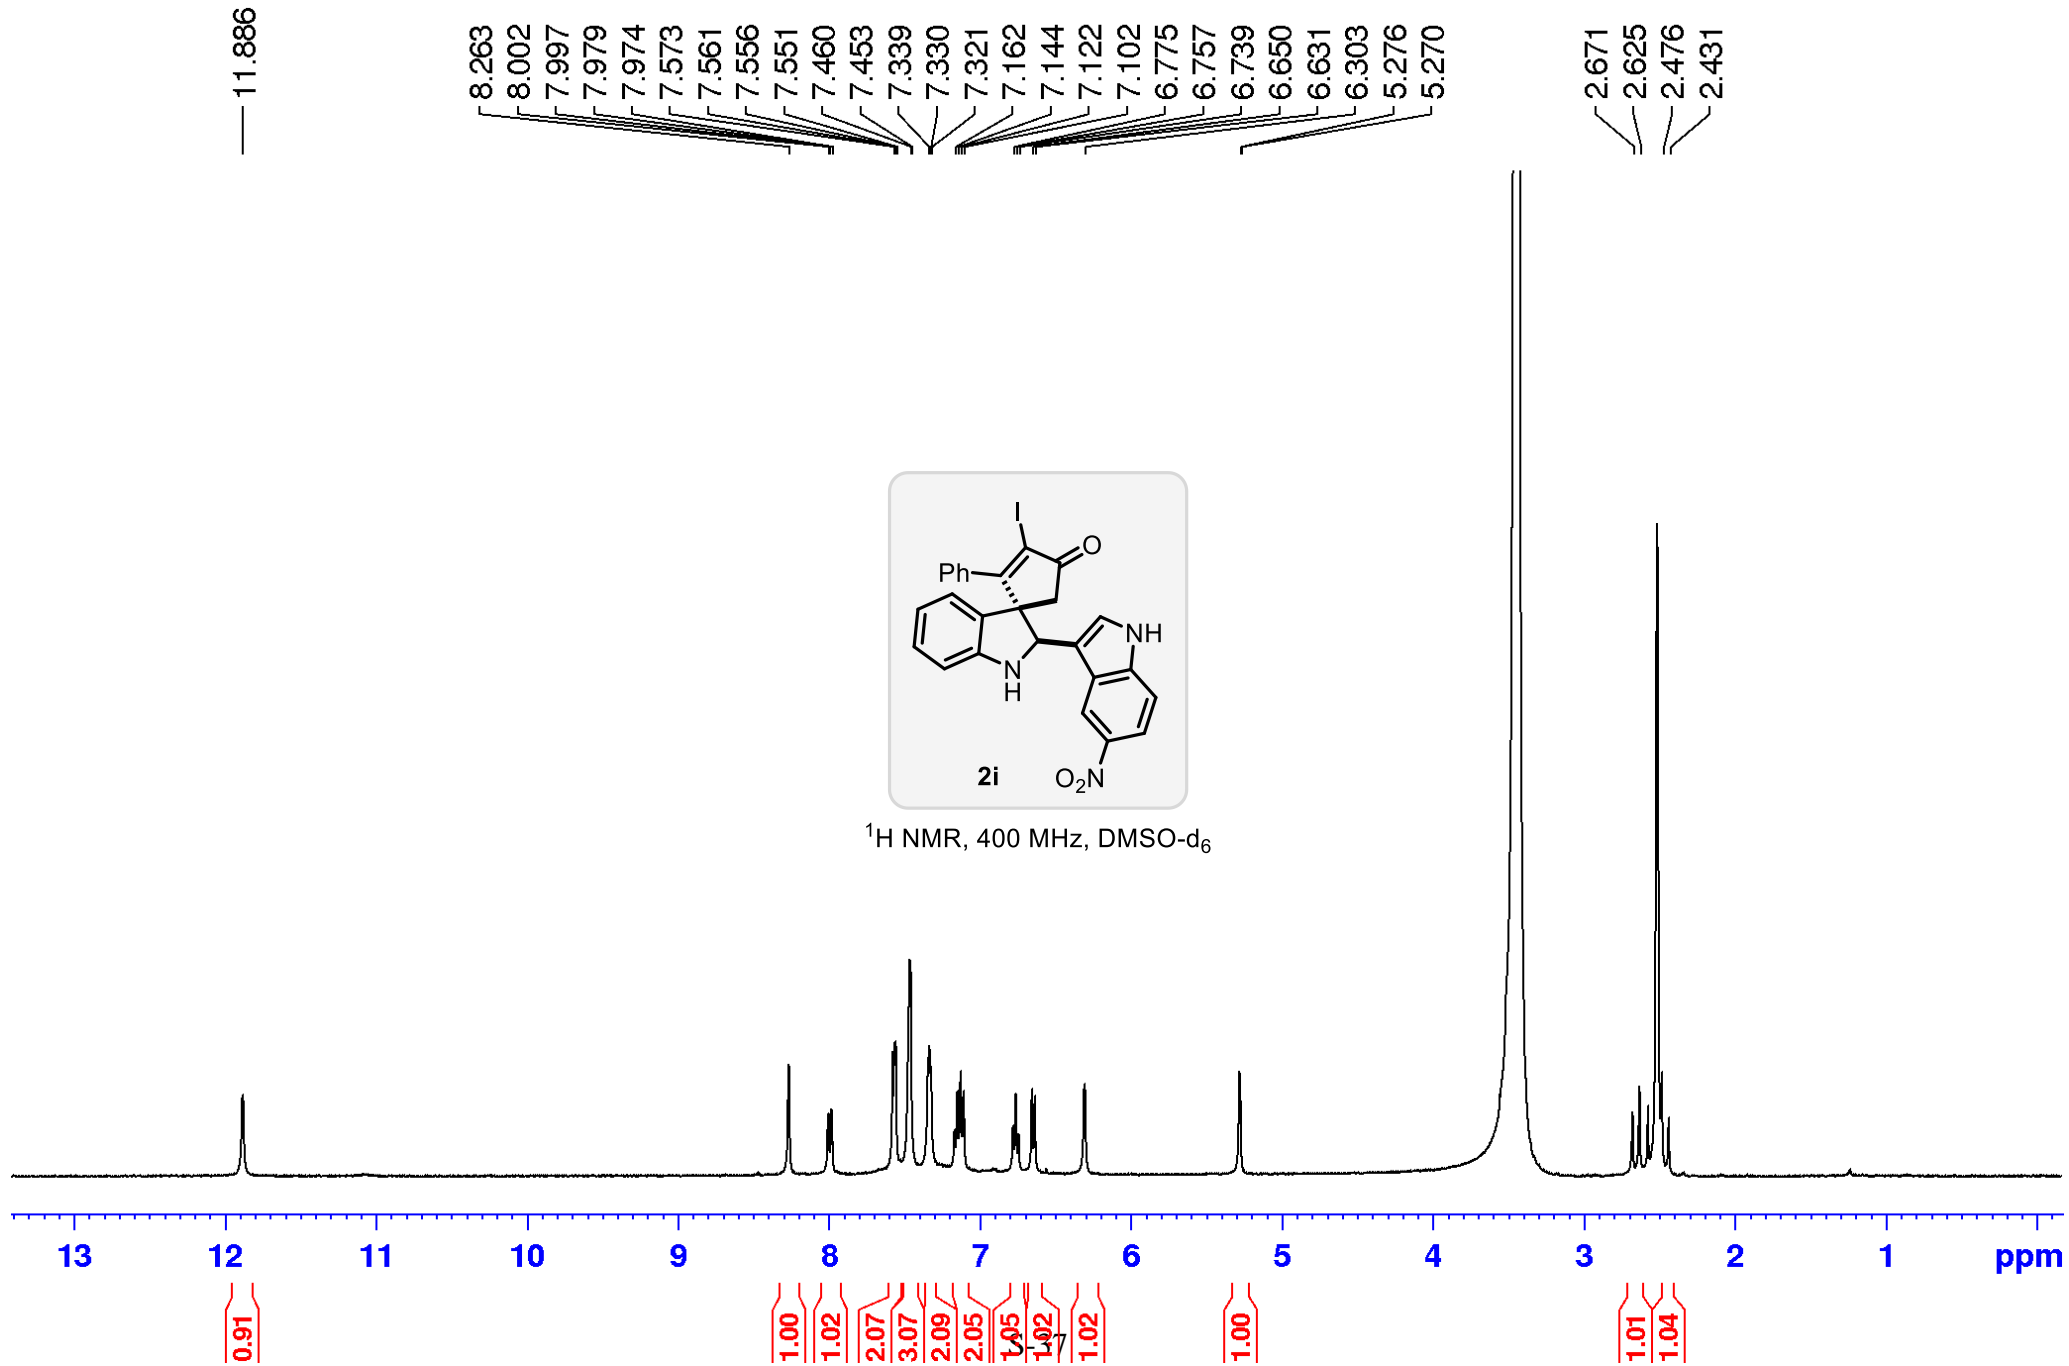

— 201.445

— 177.985

150.942  
140.533  
139.829  
135.712  
130.370  
129.535  
129.122  
128.479  
128.325  
125.236  
123.516  
118.423  
116.802  
115.524  
112.368  
109.254  
105.730

63.918  
62.594

— 44.960

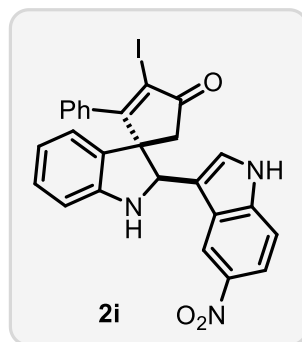

$^{13}\text{C}\{^1\text{H}\}$  NMR, 100 MHz, DMSO- $d_6$

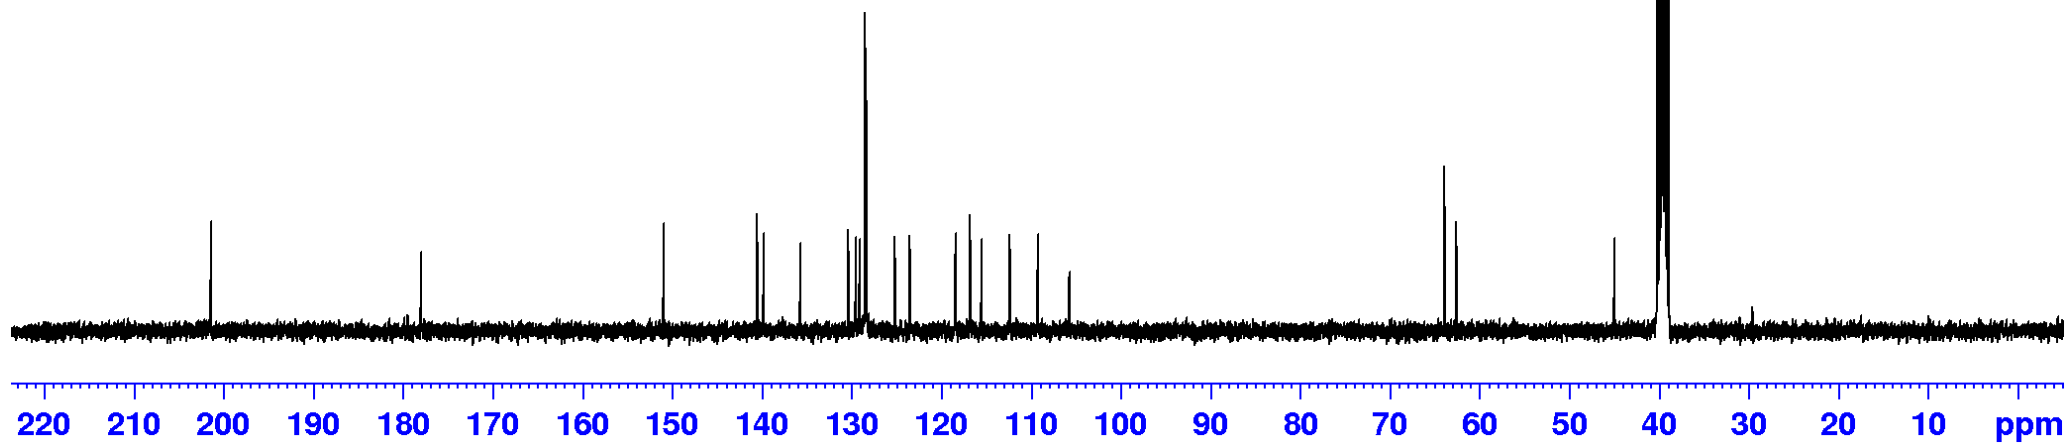

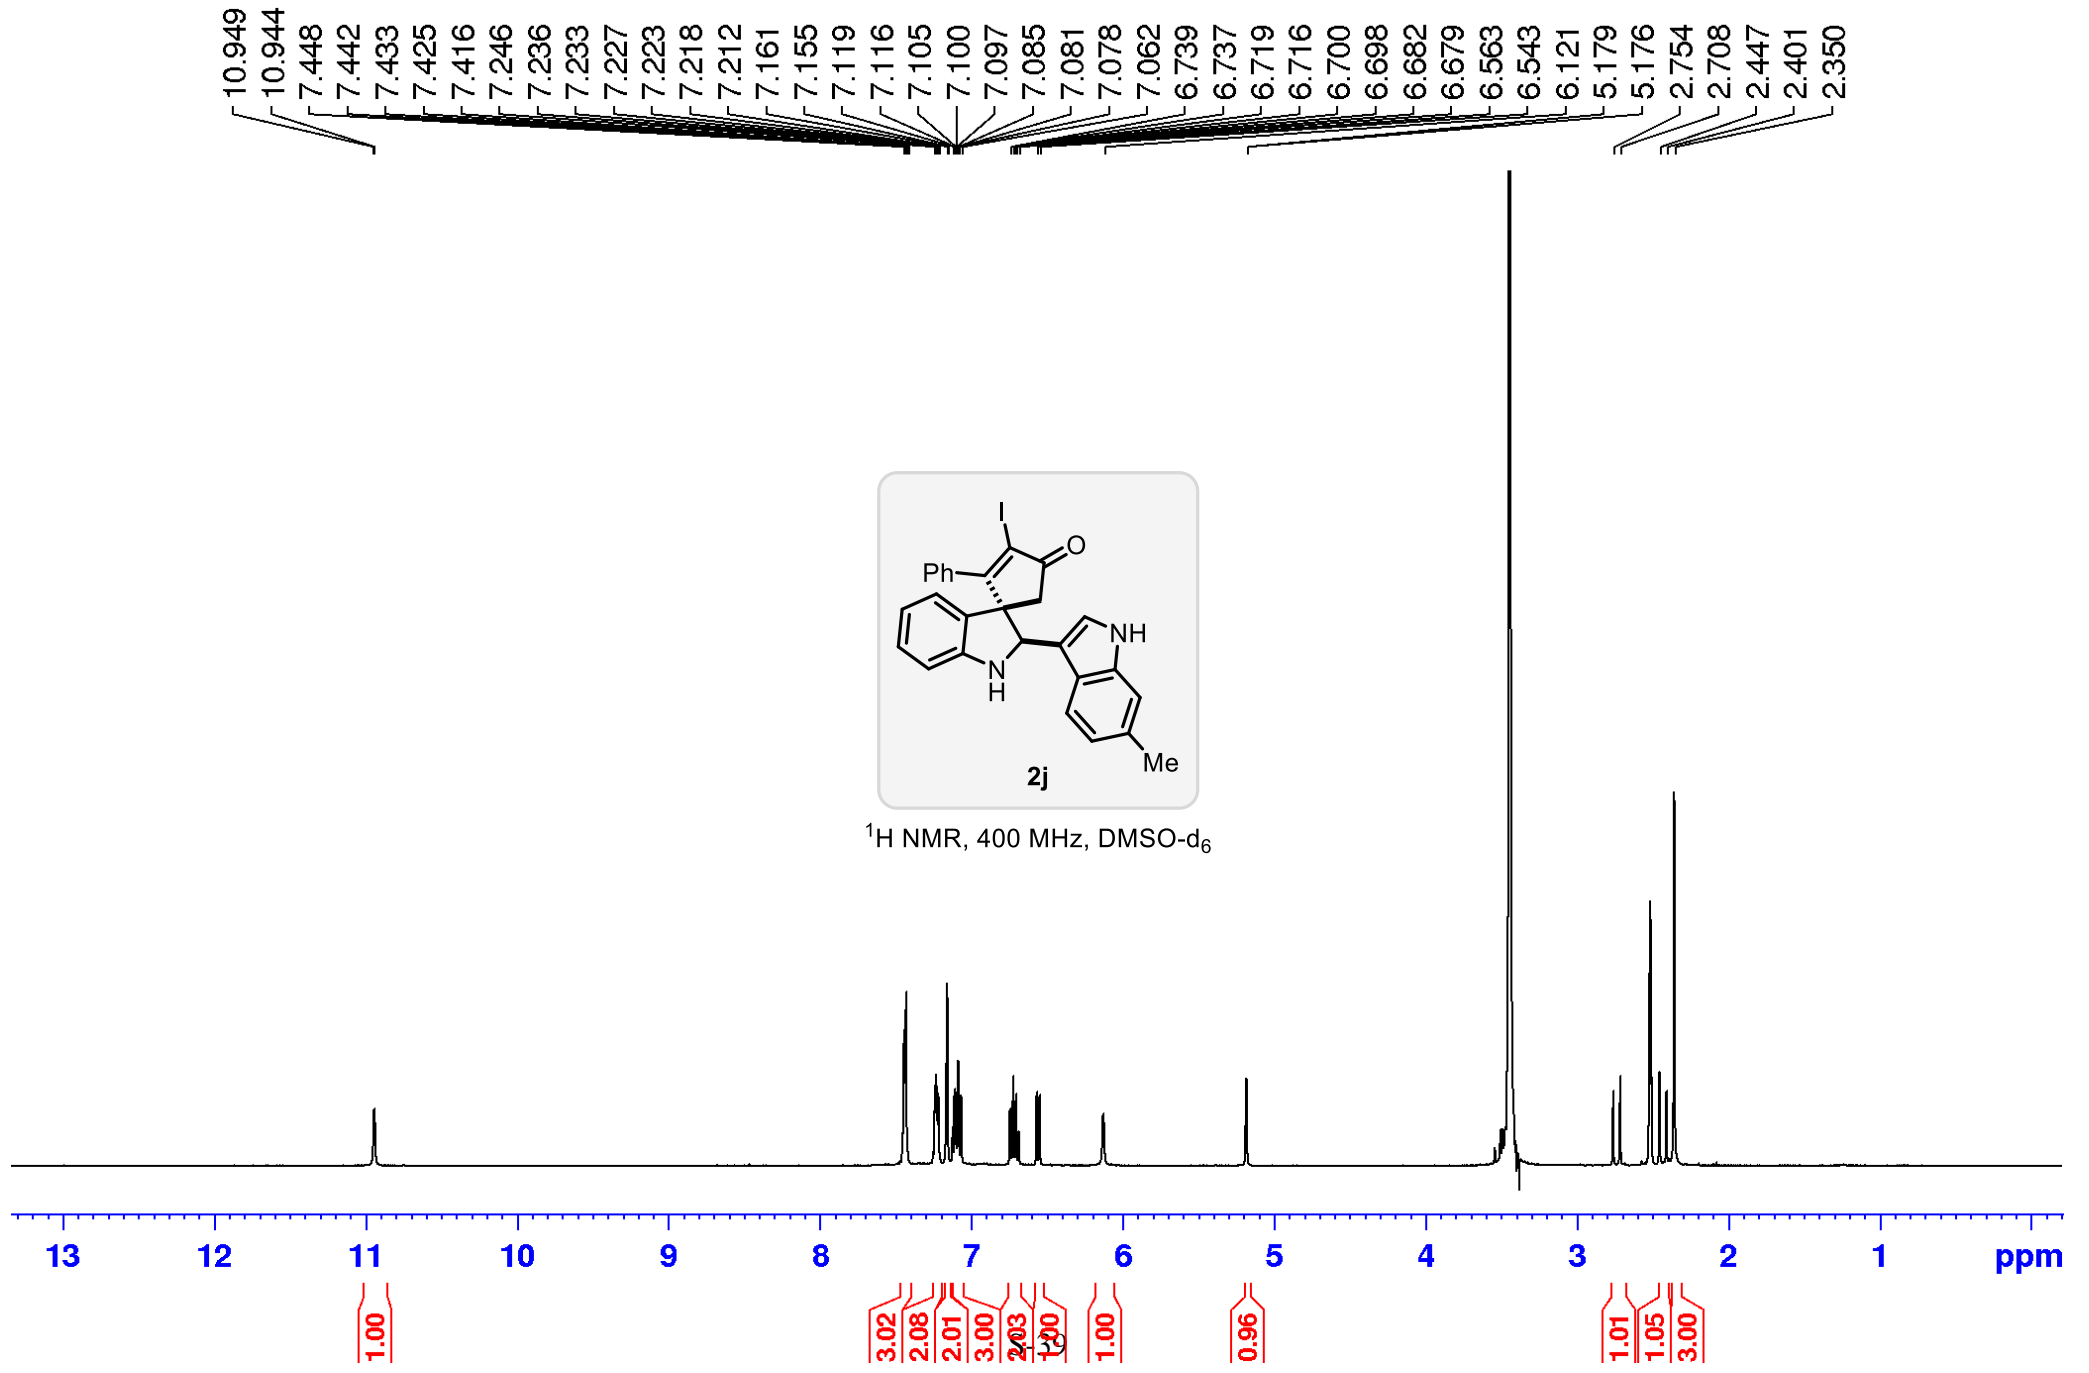

— 201.958

— 179.041

151.360  
137.234  
135.954  
130.472  
130.287  
129.416  
129.041  
128.397  
128.207  
123.908  
123.836  
123.376  
120.745  
119.437  
117.819  
112.888  
111.621  
108.756  
105.186

64.001  
63.073

— 45.063

— 21.377

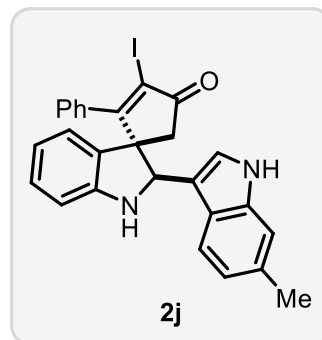

$^{13}\text{C}\{^1\text{H}\}$  NMR, 100 MHz, DMSO- $d_6$

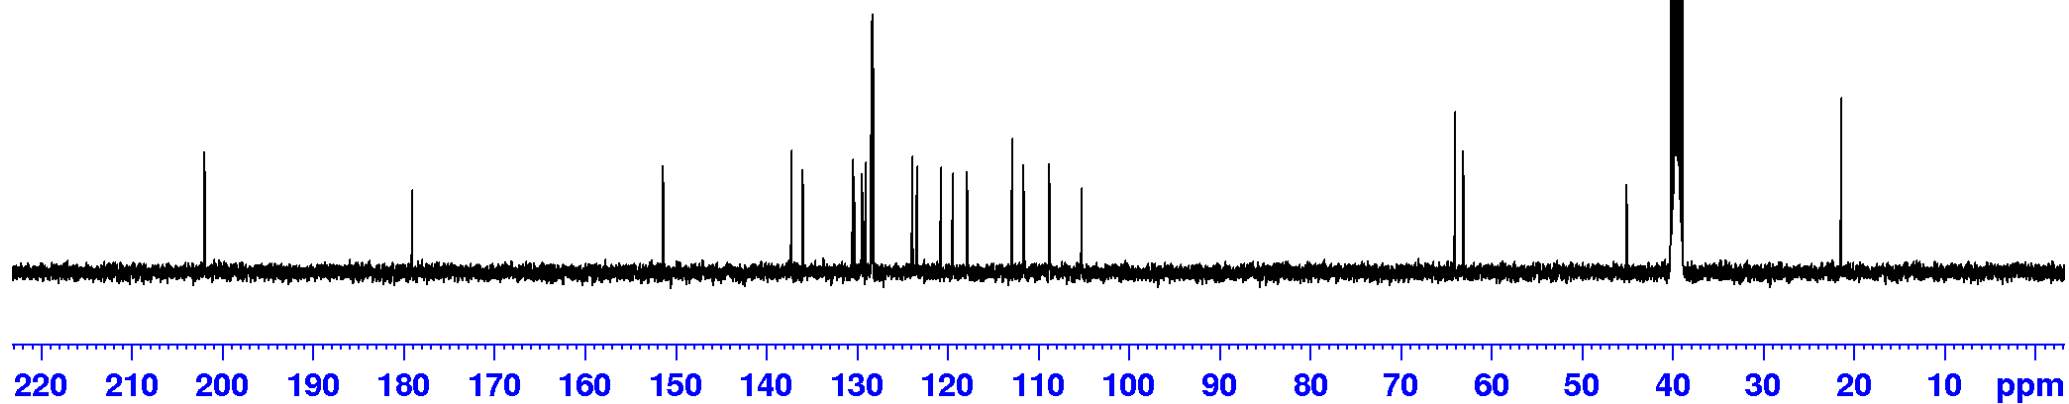

S-40



10.899  
10.894  
7.443  
7.436  
7.433  
7.428  
7.420  
7.411  
7.229  
7.219  
7.216  
7.211  
7.206  
7.202  
7.199  
7.195  
7.189  
7.114  
7.108  
7.098  
7.095  
7.089  
7.076  
7.071  
7.054  
6.865  
6.859  
6.717  
6.714  
6.698  
6.696  
6.680  
6.677  
6.567  
6.562  
6.551  
6.546  
6.540  
6.532  
6.121  
6.116  
5.150  
5.145  
3.738  
2.749  
2.703  
2.460  
2.414

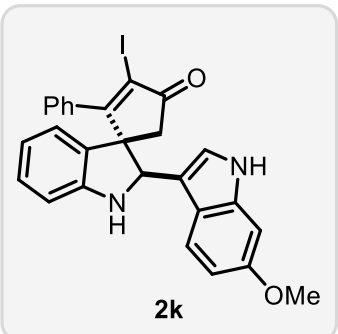

<sup>1</sup>H NMR, 400 MHz, DMSO-d<sub>6</sub>

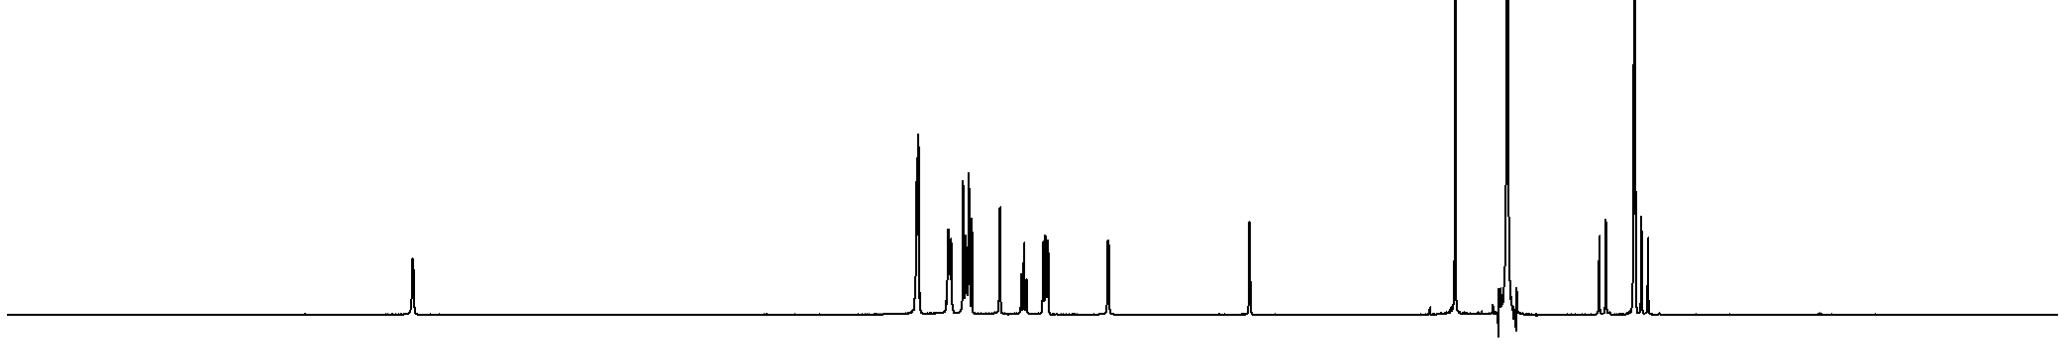

13 12 11 10 9 8 7 6 5 4 3 2 1 ppm

— 201.882

— 179.057

155.554  
151.347  
137.557  
135.915  
130.140  
129.316  
129.002  
128.327  
128.100  
123.344  
123.141  
120.306  
120.179  
117.725  
113.061  
109.140  
108.653  
105.118  
94.710

63.892  
63.062

— 55.122

— 44.959

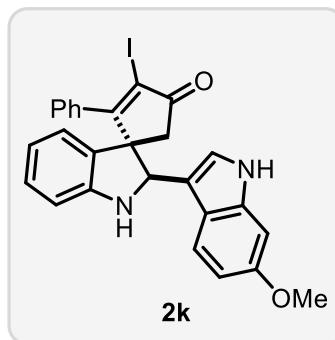

$^{13}\text{C}\{^1\text{H}\}$  NMR, 100 MHz, DMSO- $d_6$

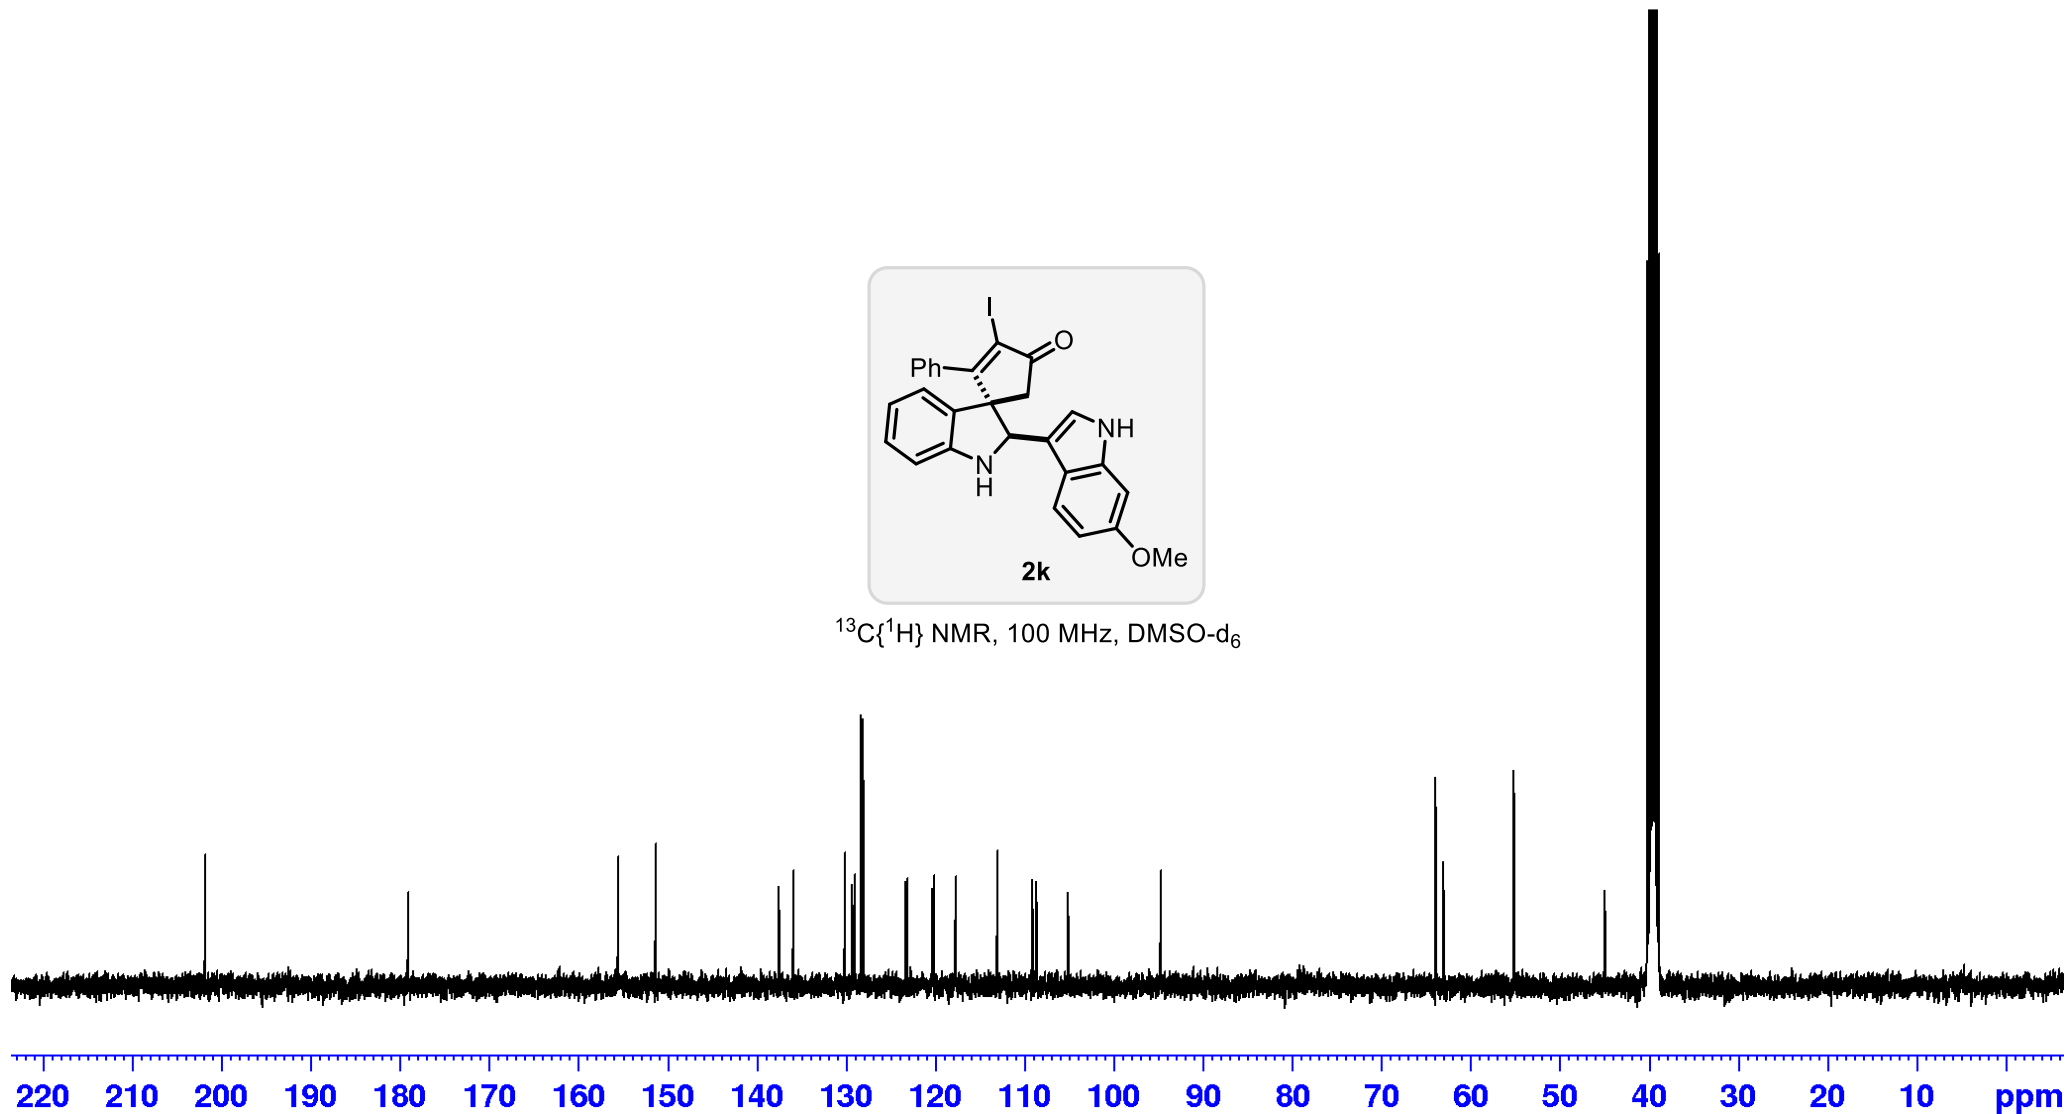

S-42

10.920  
10.914  
7.474  
7.470  
7.453  
7.445  
7.438  
7.433  
7.429  
7.422  
7.414  
7.412  
7.394  
7.390  
7.378  
7.375  
7.340  
7.321  
7.228  
7.225  
7.219  
7.215  
7.210  
7.204  
7.124  
7.117  
7.113  
7.105  
7.102  
7.098  
7.091  
7.083  
7.079  
6.952  
6.946  
6.721  
6.705  
6.702  
6.669  
6.663  
6.647  
6.641  
6.561  
6.542  
6.129  
6.124  
5.162  
5.157  
5.097  
2.766  
2.720  
2.477  
2.431

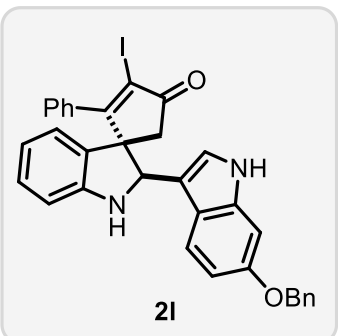

<sup>1</sup>H NMR, 400 MHz, DMSO-d<sub>6</sub>

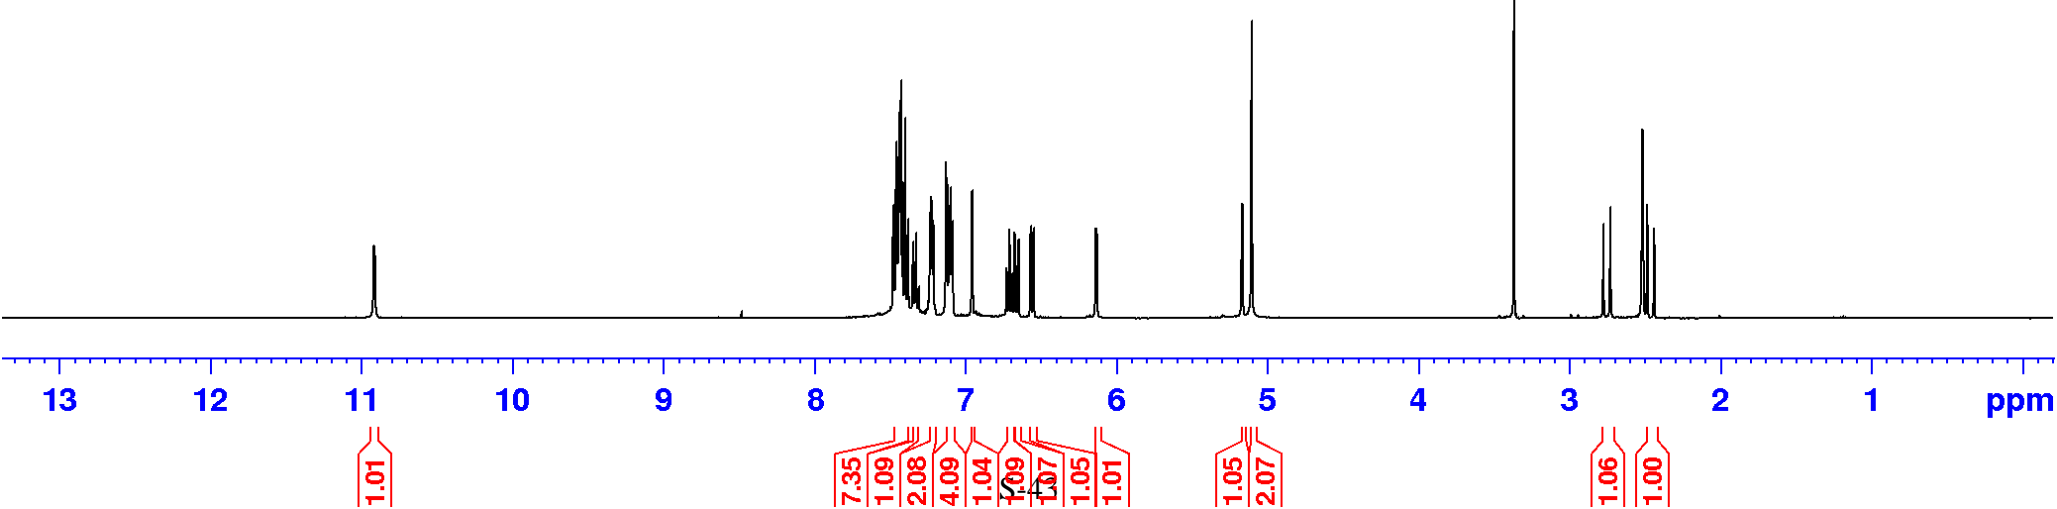

— 201.859

— 179.042

154.562

151.340

137.538

137.431

135.916

130.117

129.285

128.990

128.409

128.308

128.085

127.674

127.540

123.346

123.305

120.405

120.355

117.707

113.043

109.699

108.639

105.149

96.088

— 69.439

— 63.887

— 63.051

— 44.951

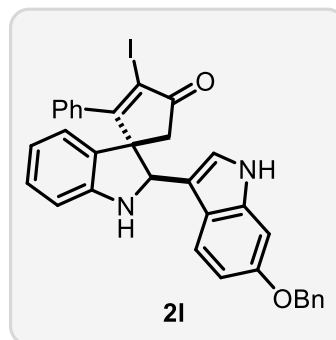

<sup>13</sup>C{<sup>1</sup>H} NMR, 100 MHz, DMSO-d<sub>6</sub>

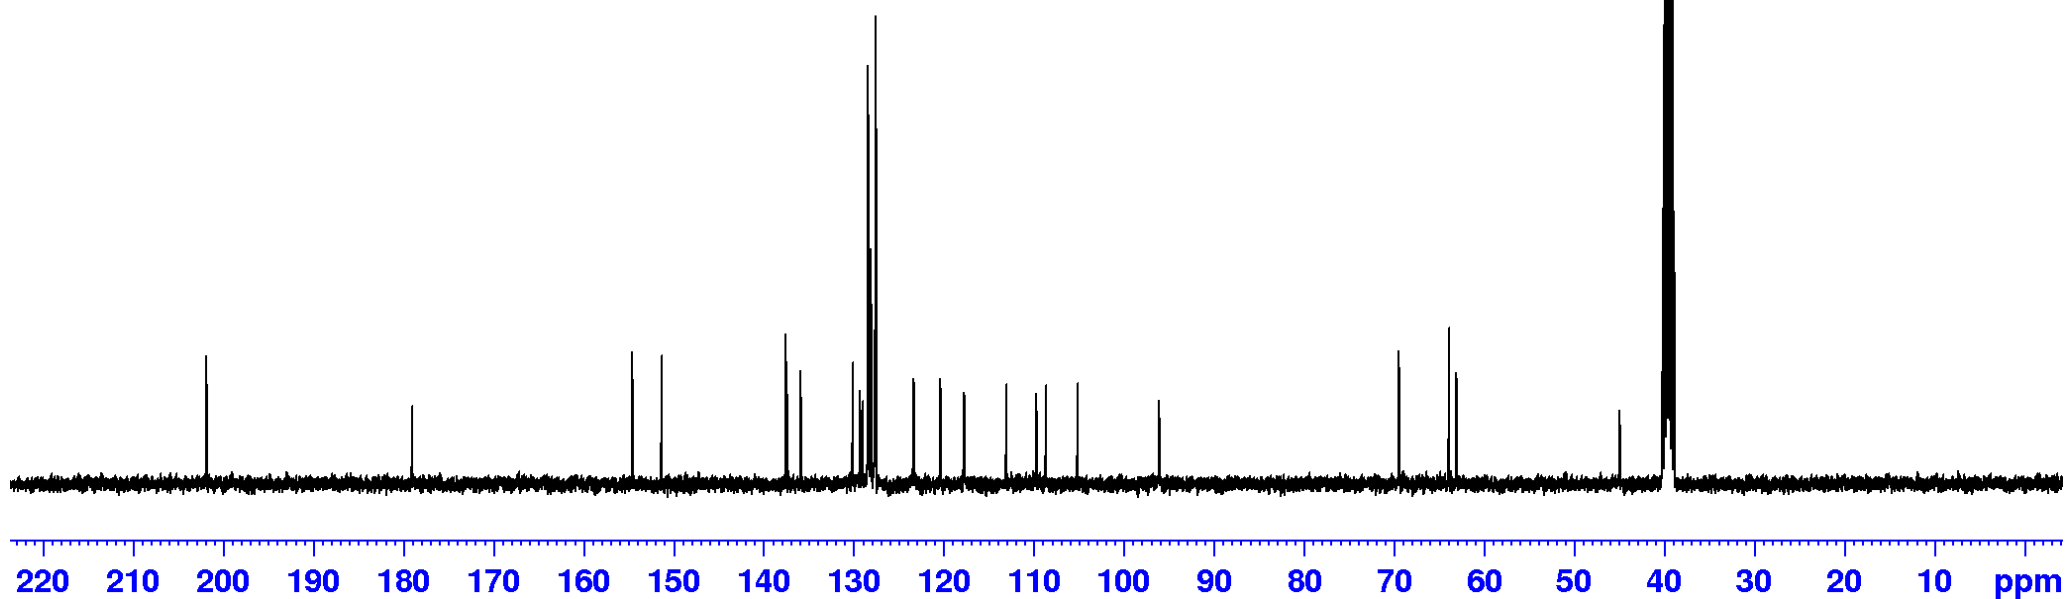

S-44

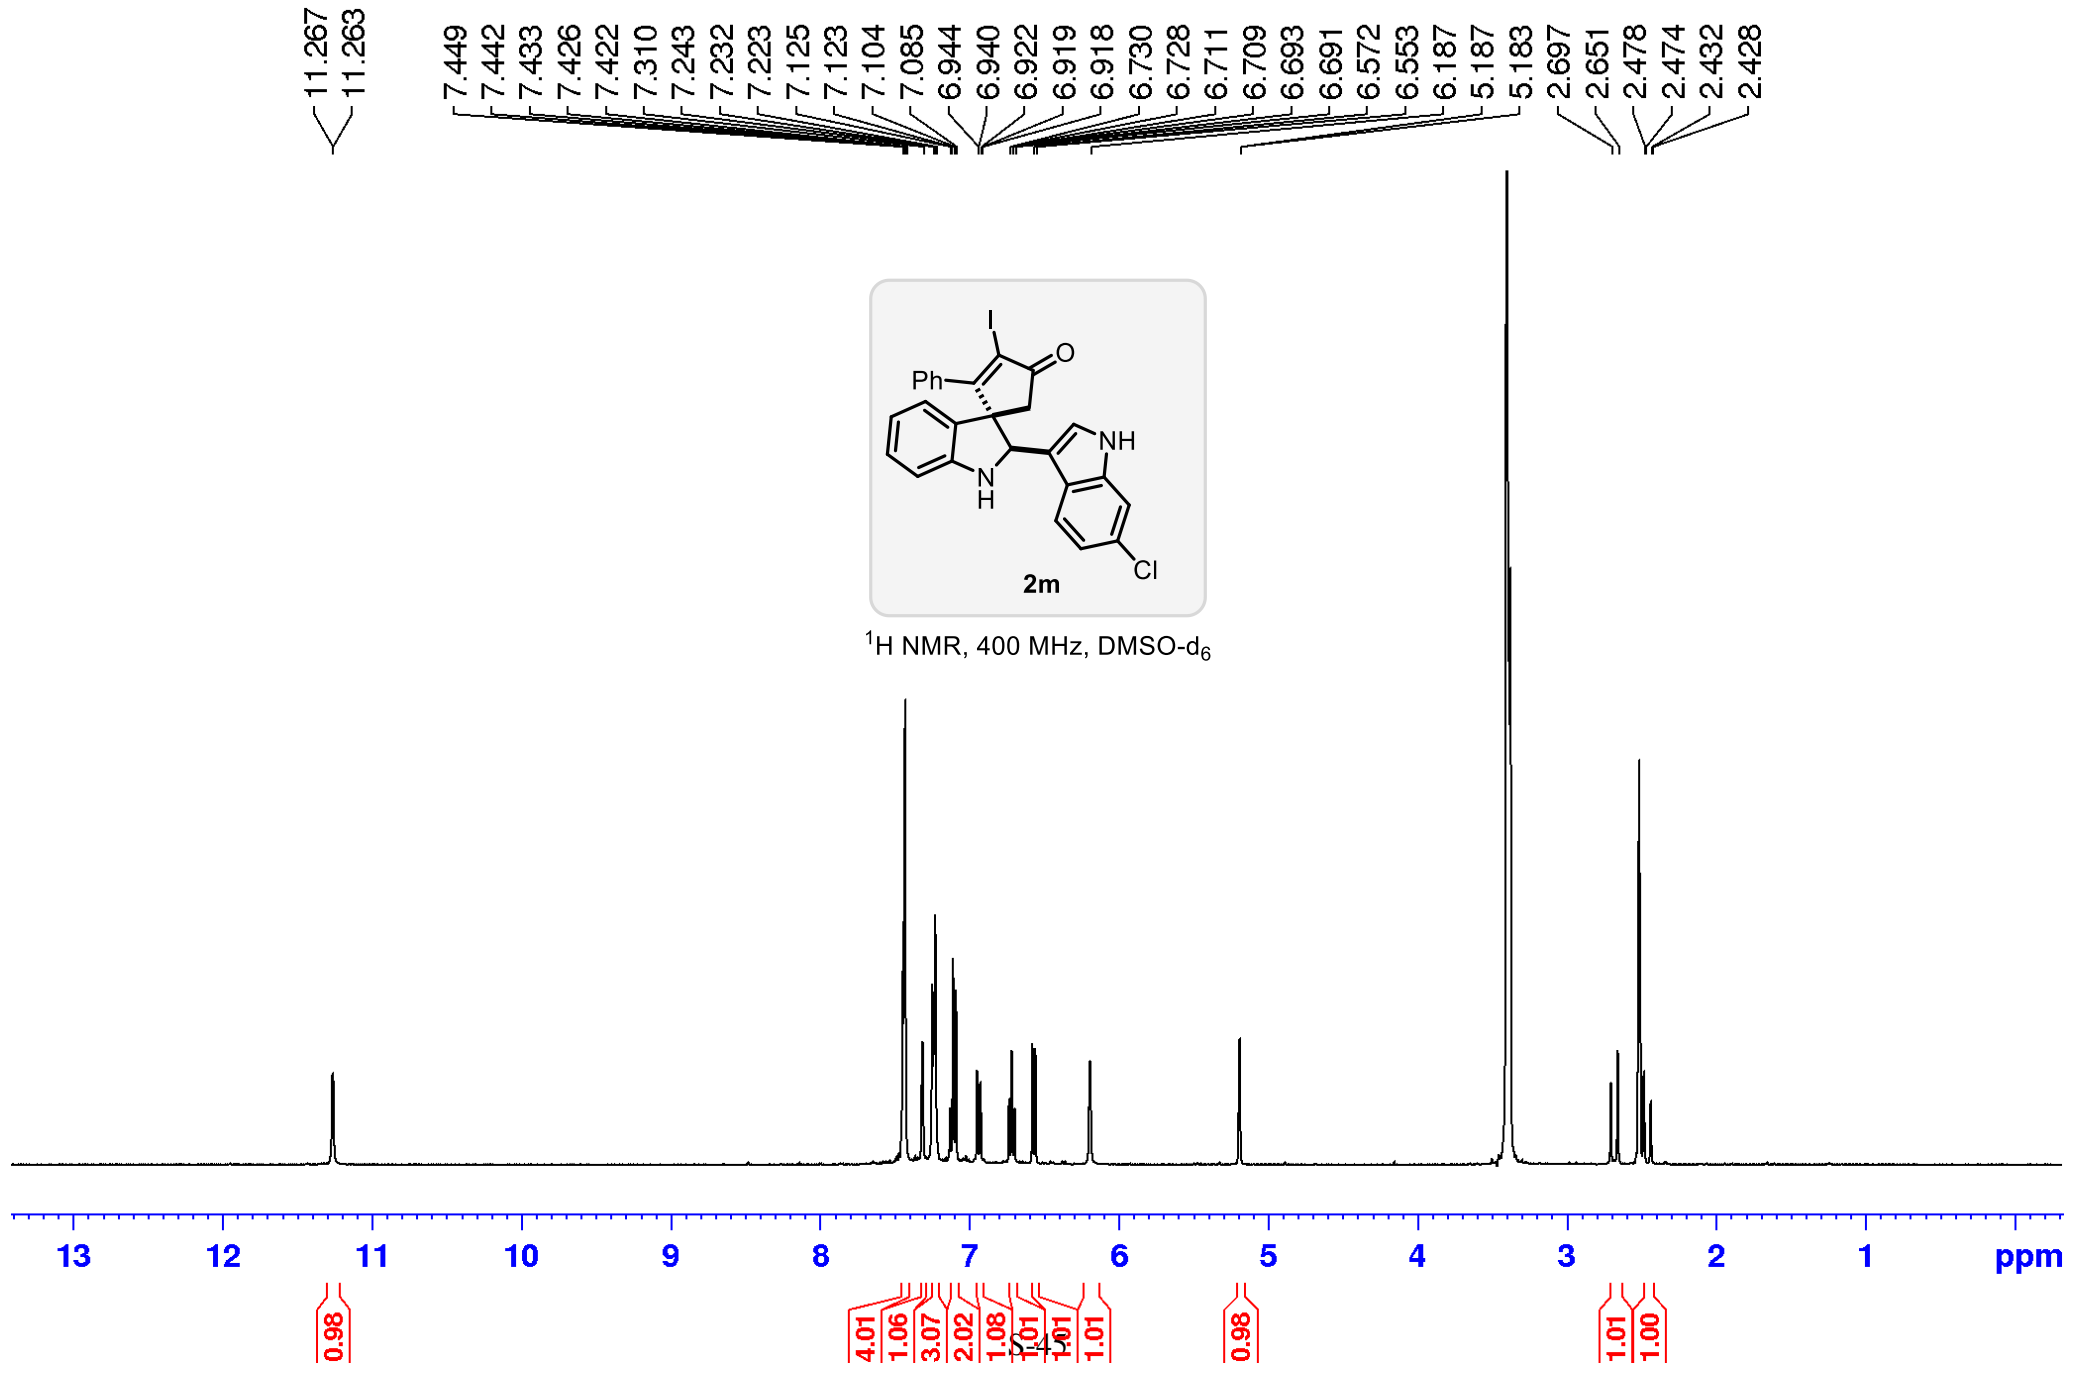

— 201.675

— 178.742

151.193  
137.109  
135.867  
130.102  
129.353  
129.042  
128.371  
128.131  
126.085  
125.732  
124.787  
123.441  
121.066  
119.248  
117.939  
113.166  
111.420  
108.817  
105.354

63.916  
62.778

— 44.920

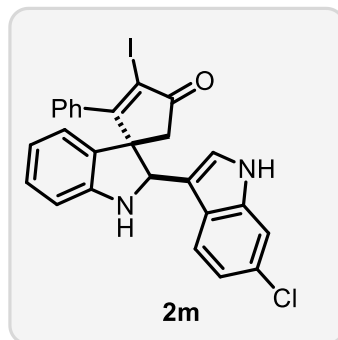

$^{13}\text{C}\{^1\text{H}\}$  NMR, 100 MHz, DMSO- $\text{d}_6$

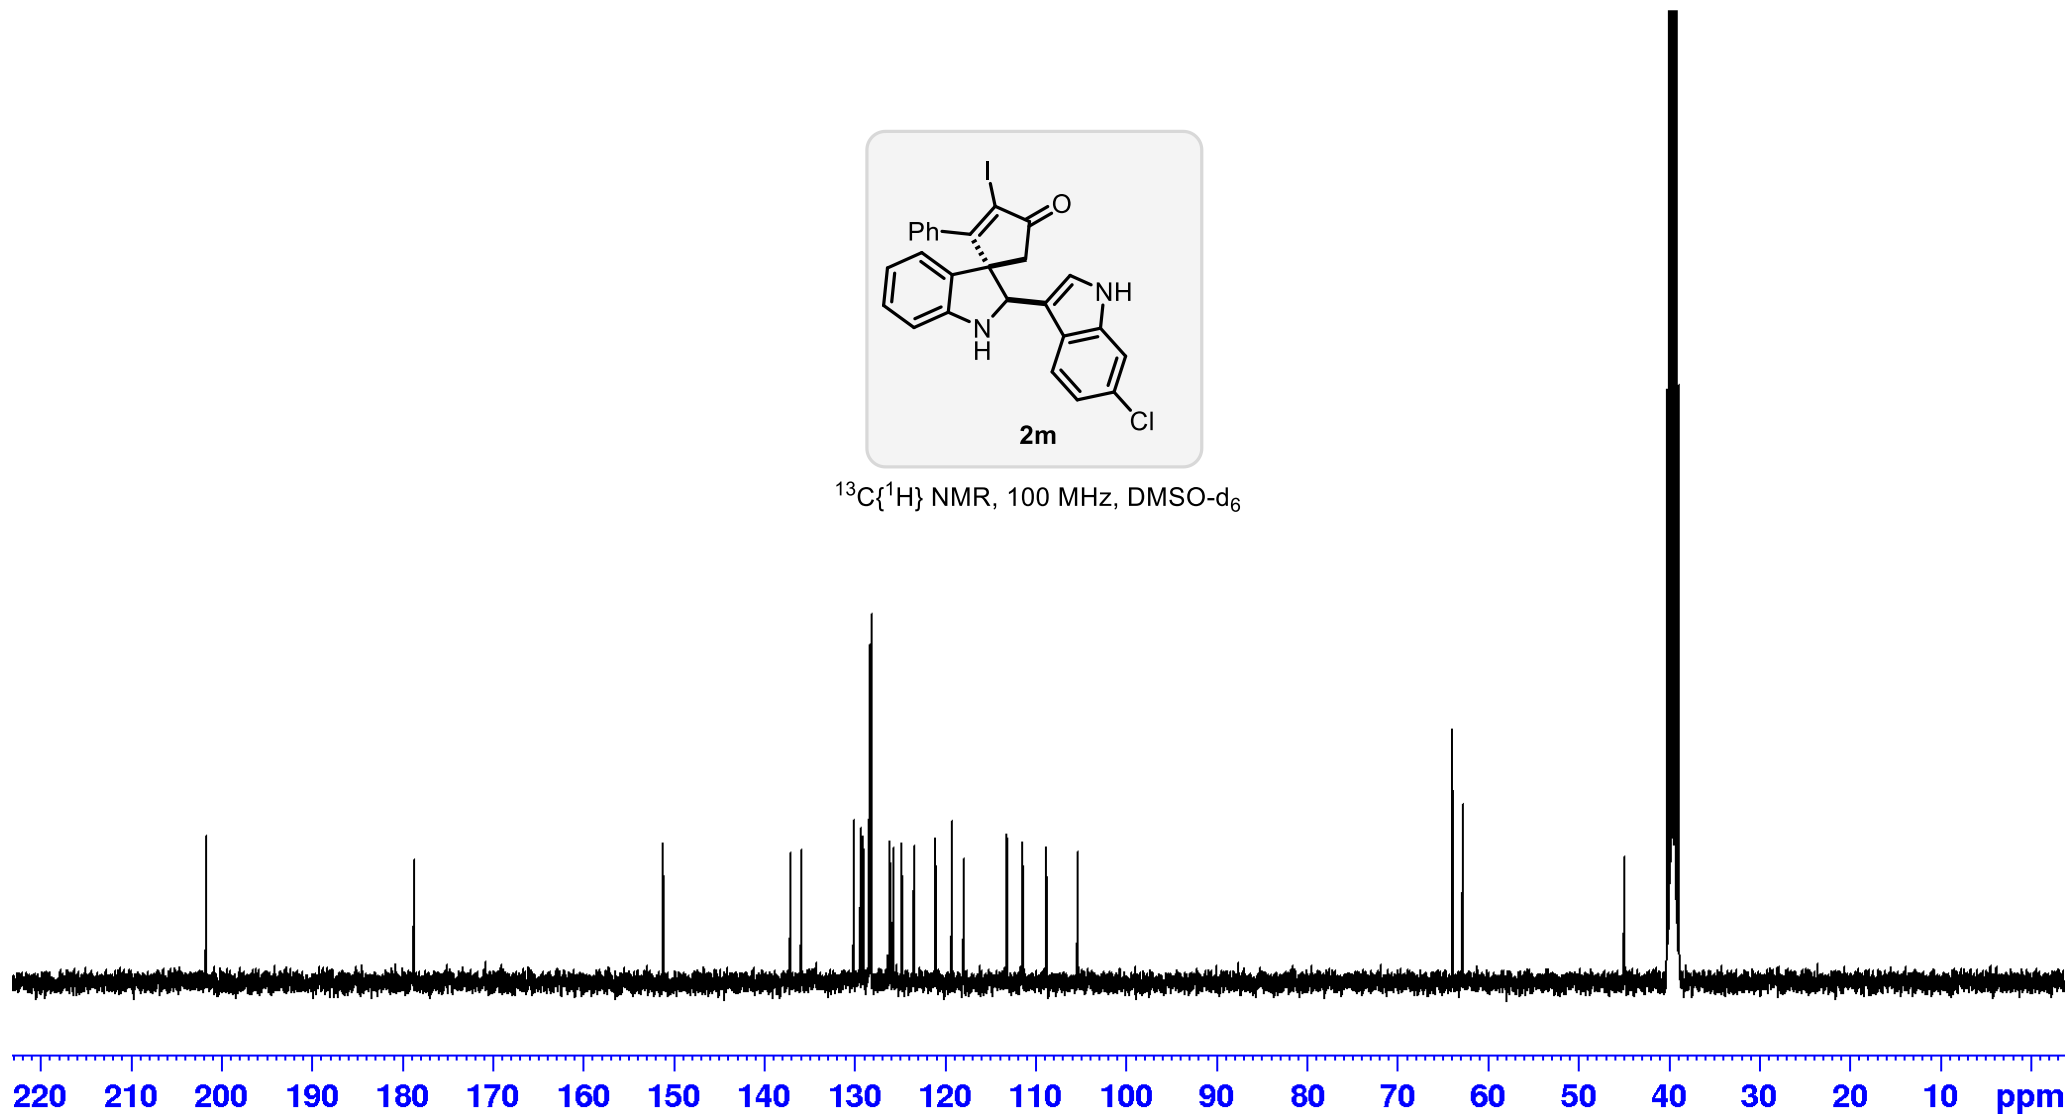

S-46

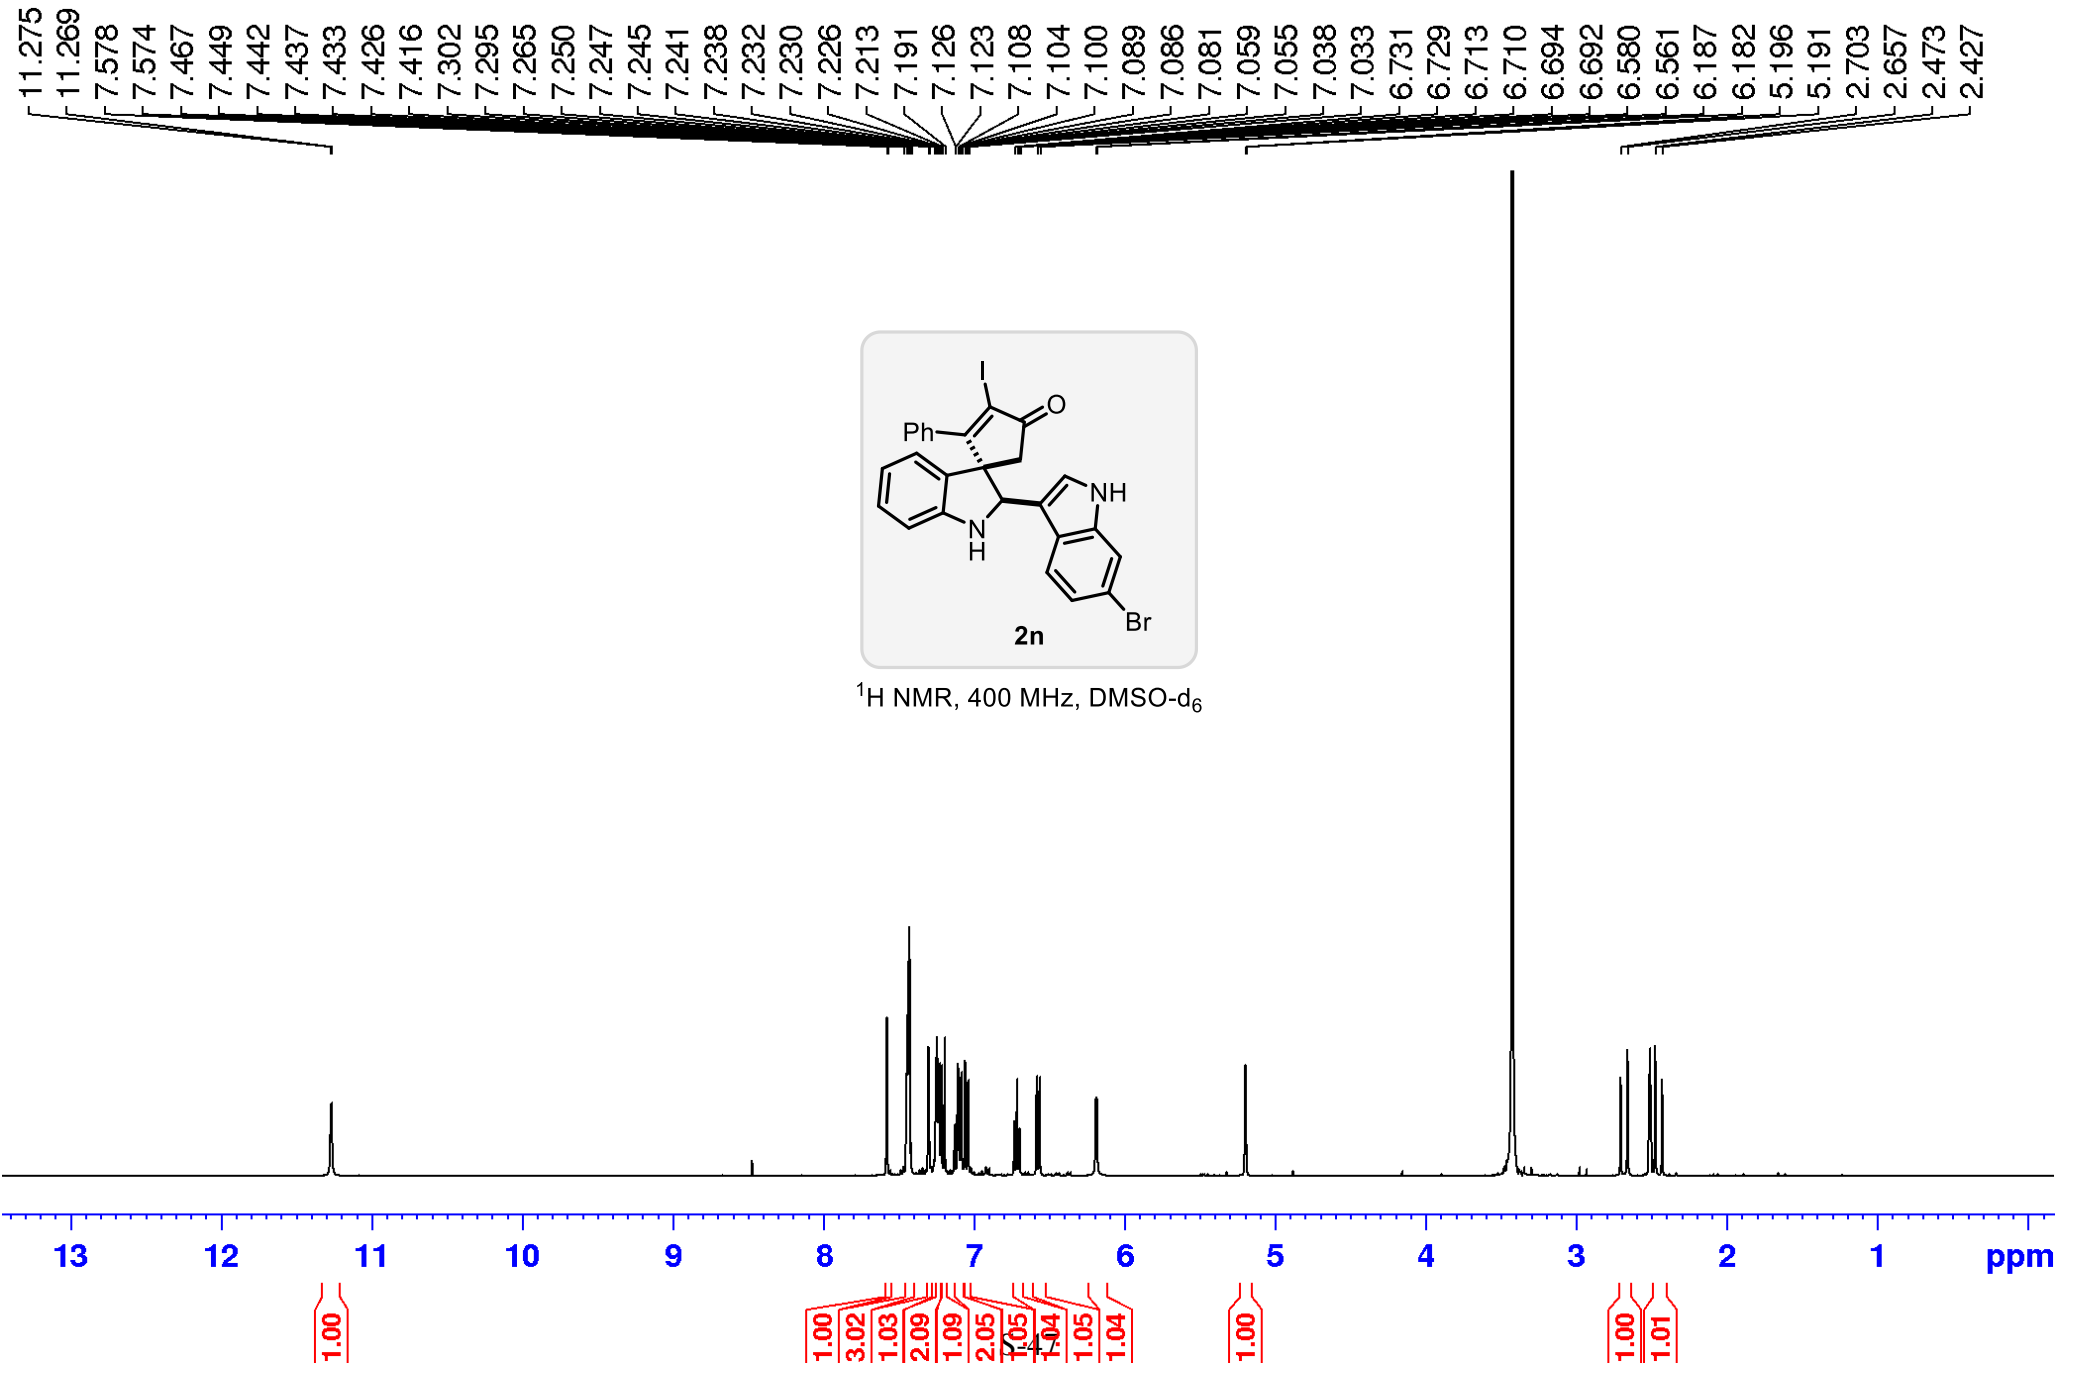

— 201.700

— 178.718

151.204  
137.605  
135.882  
130.145  
129.395  
129.067  
128.407  
128.176  
125.666  
125.067  
123.468  
121.814  
121.486  
117.986  
114.407  
114.169  
113.174  
108.868  
105.404

63.969  
62.793

— 44.960

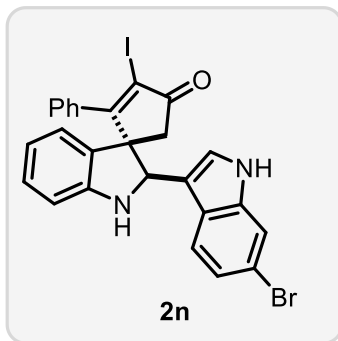

$^{13}\text{C}\{^1\text{H}\}$  NMR, 100 MHz, DMSO- $d_6$

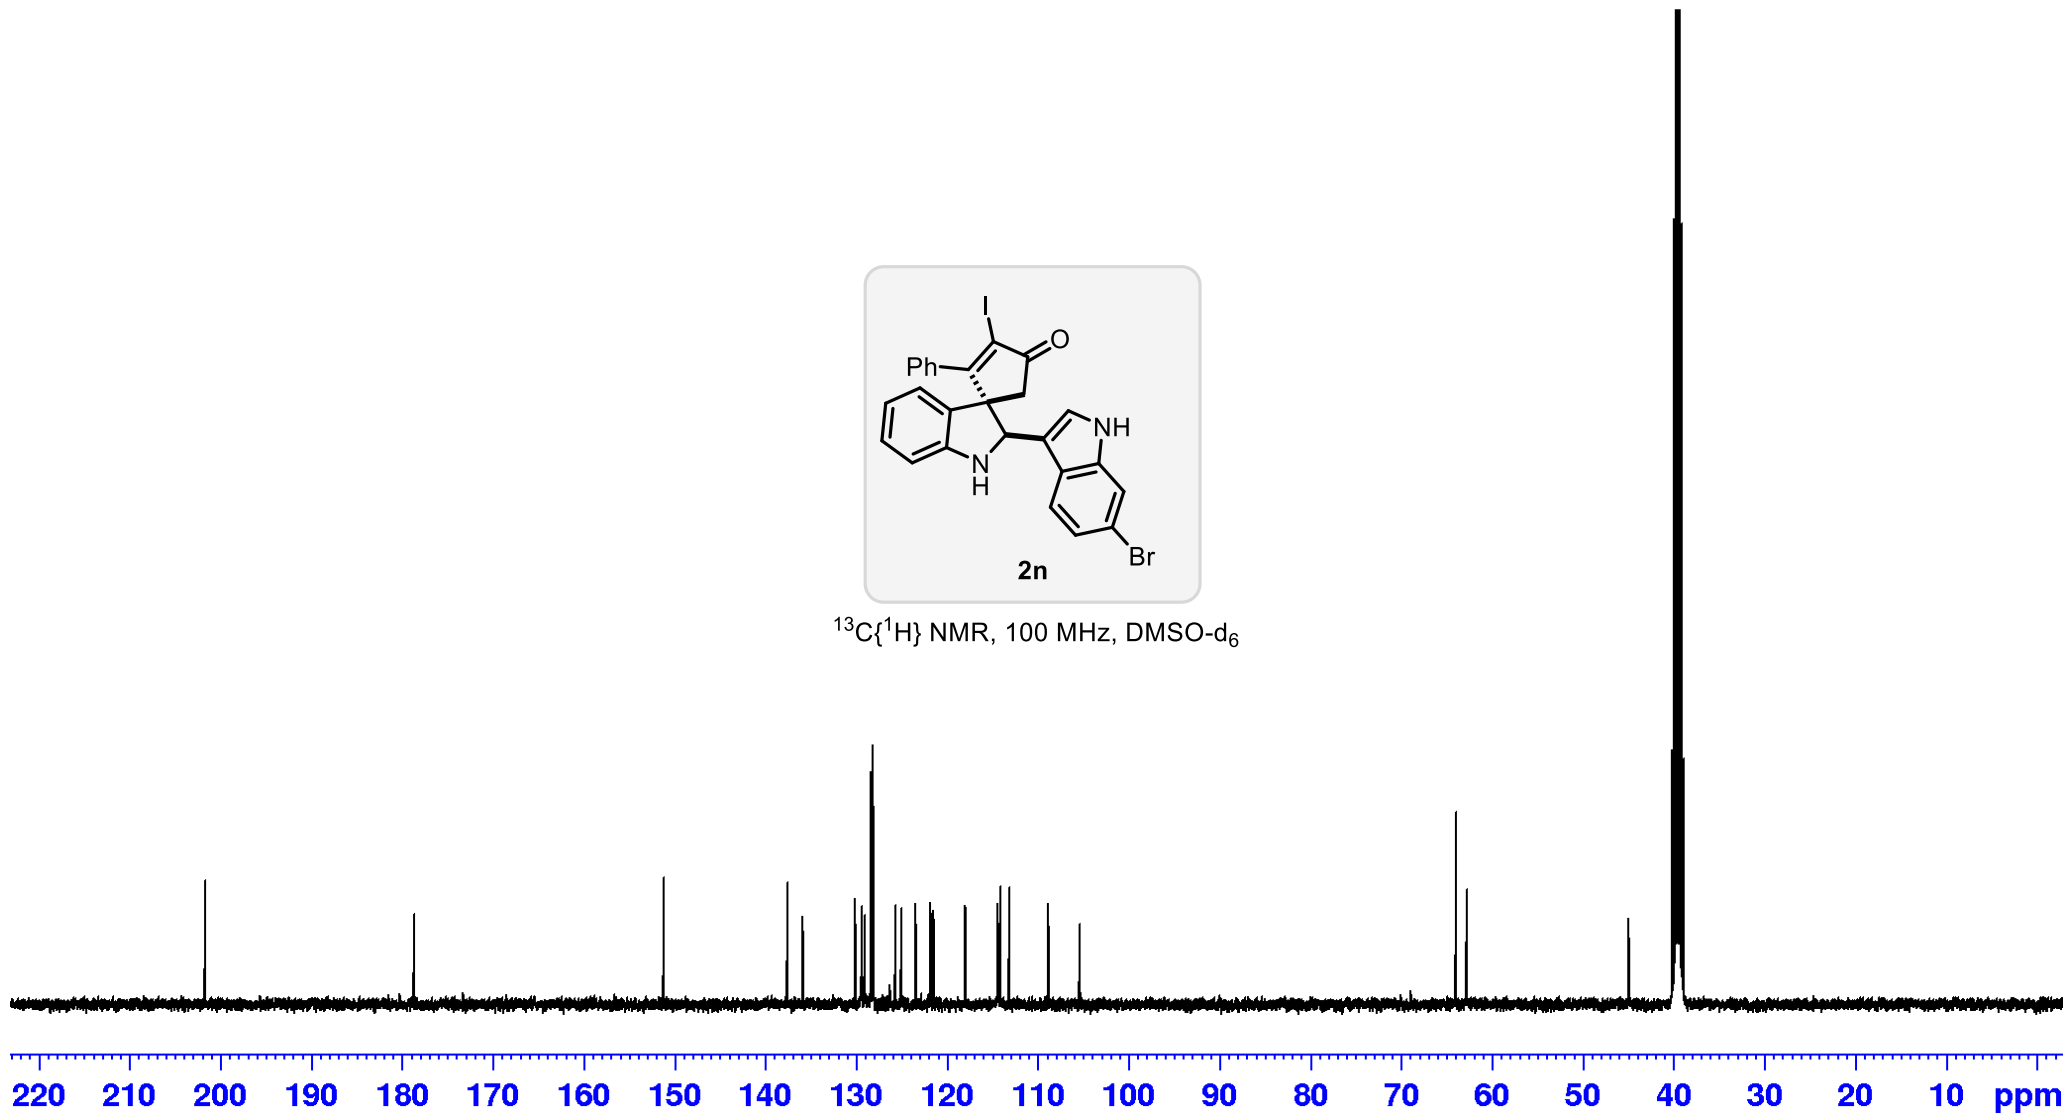



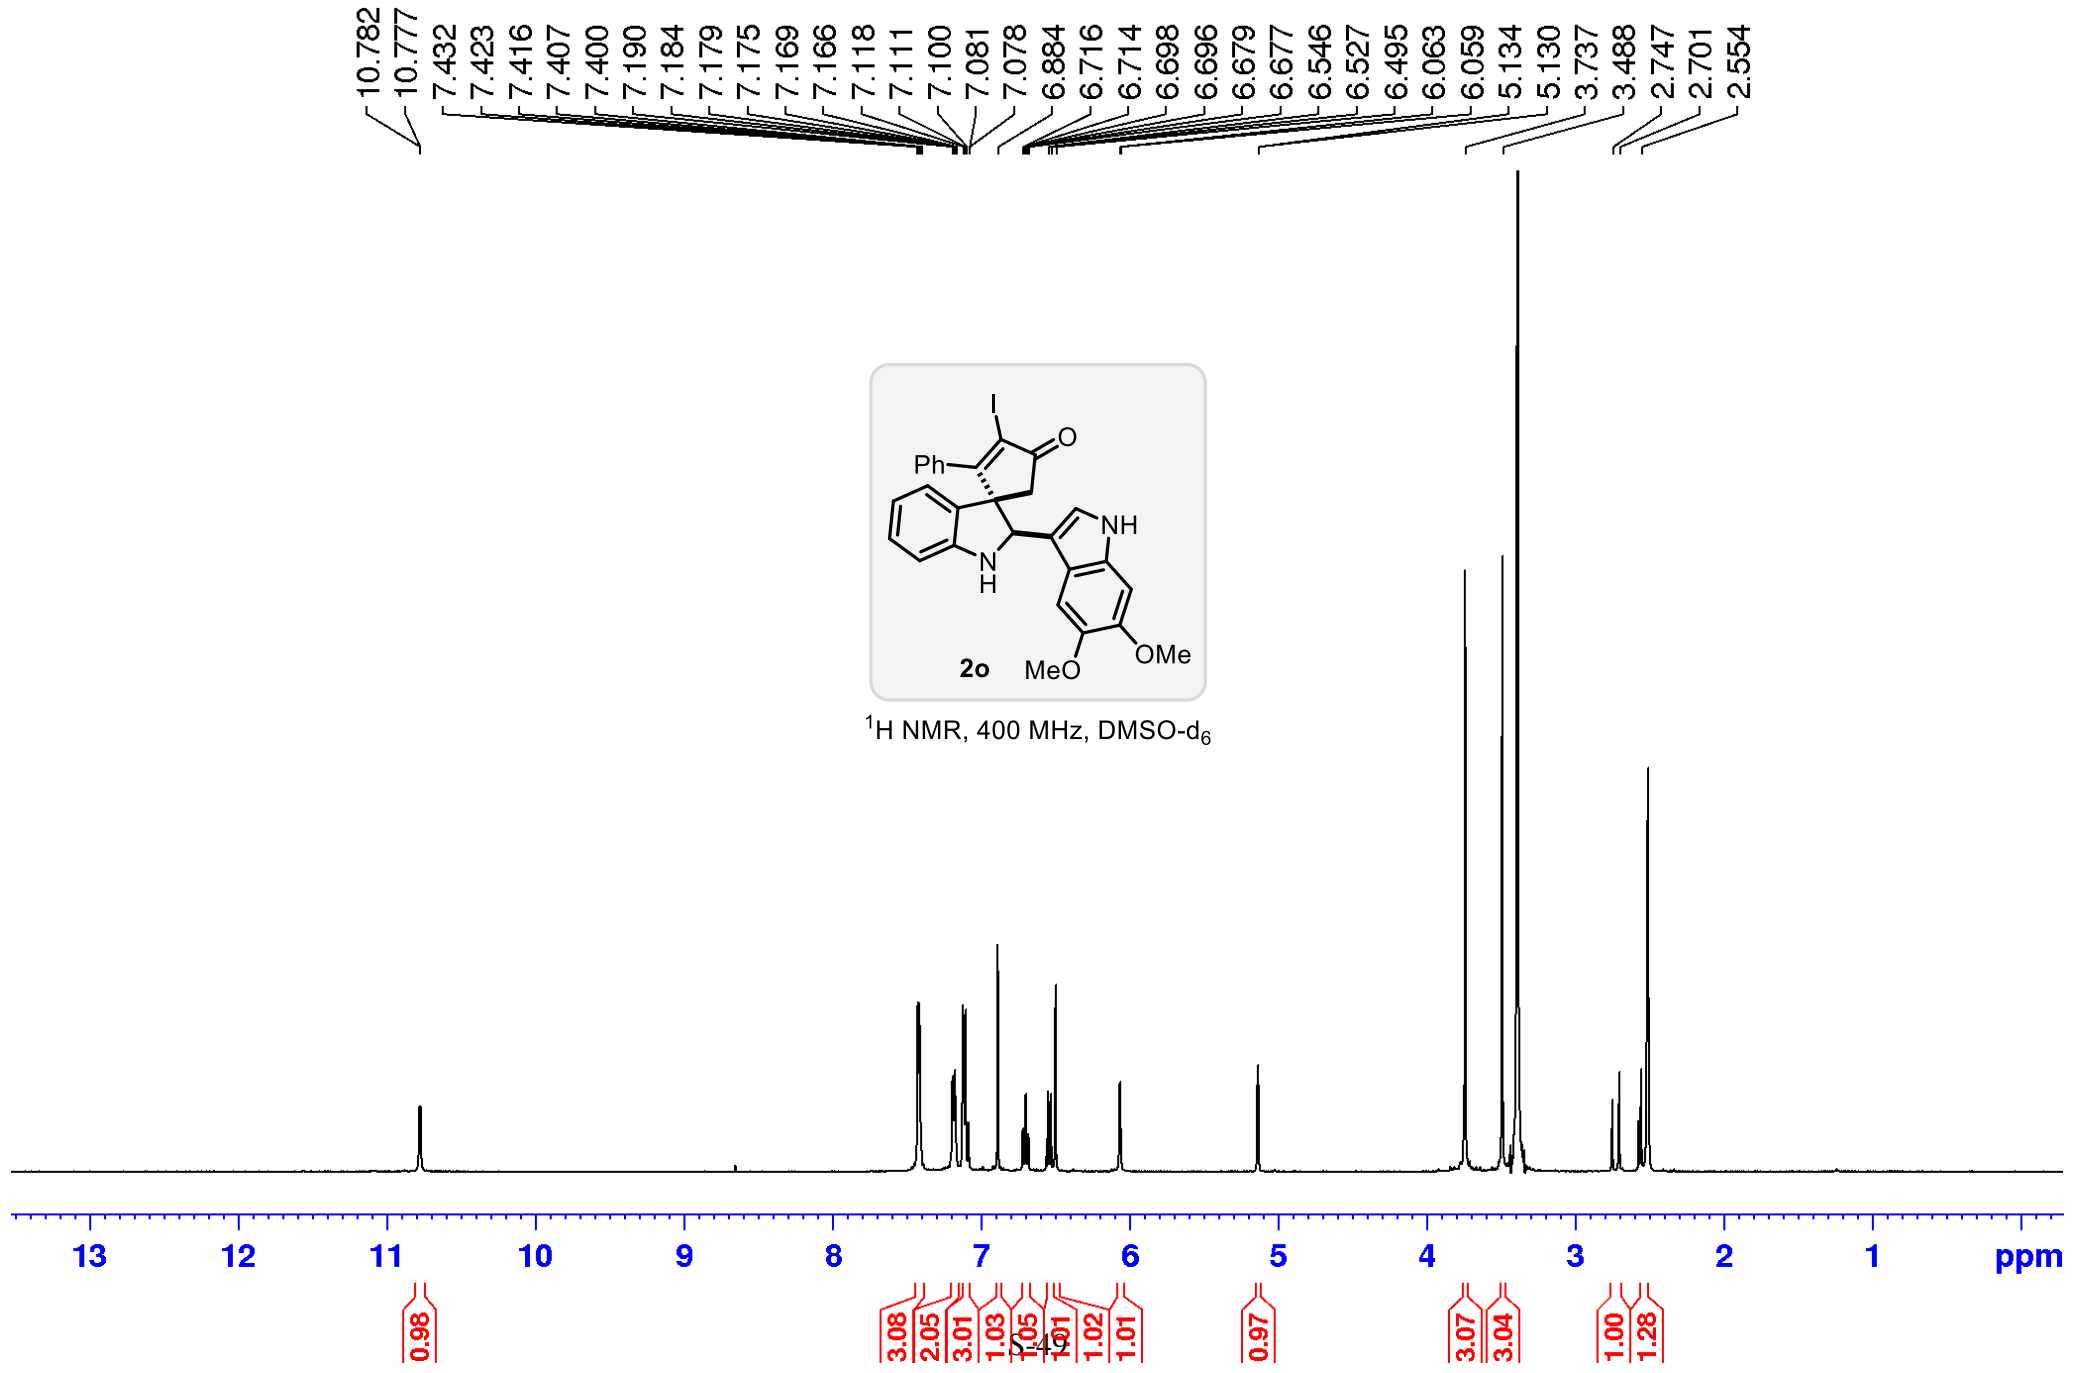

— 202.045

— 179.581

151.650  
146.383  
144.183  
135.895  
131.224  
130.040  
129.262  
129.048  
128.249  
127.872  
123.202  
122.811  
118.233  
117.632  
113.789  
108.491  
104.845  
101.975  
95.280

63.513  
63.264  
55.600  
55.570  
— 44.635

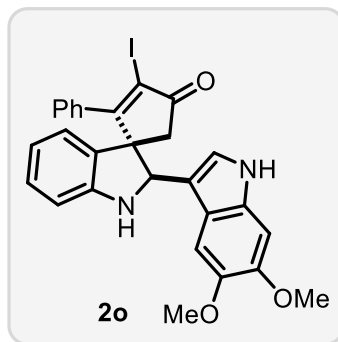

<sup>13</sup>C{<sup>1</sup>H} NMR, 100 MHz, DMSO-d<sub>6</sub>

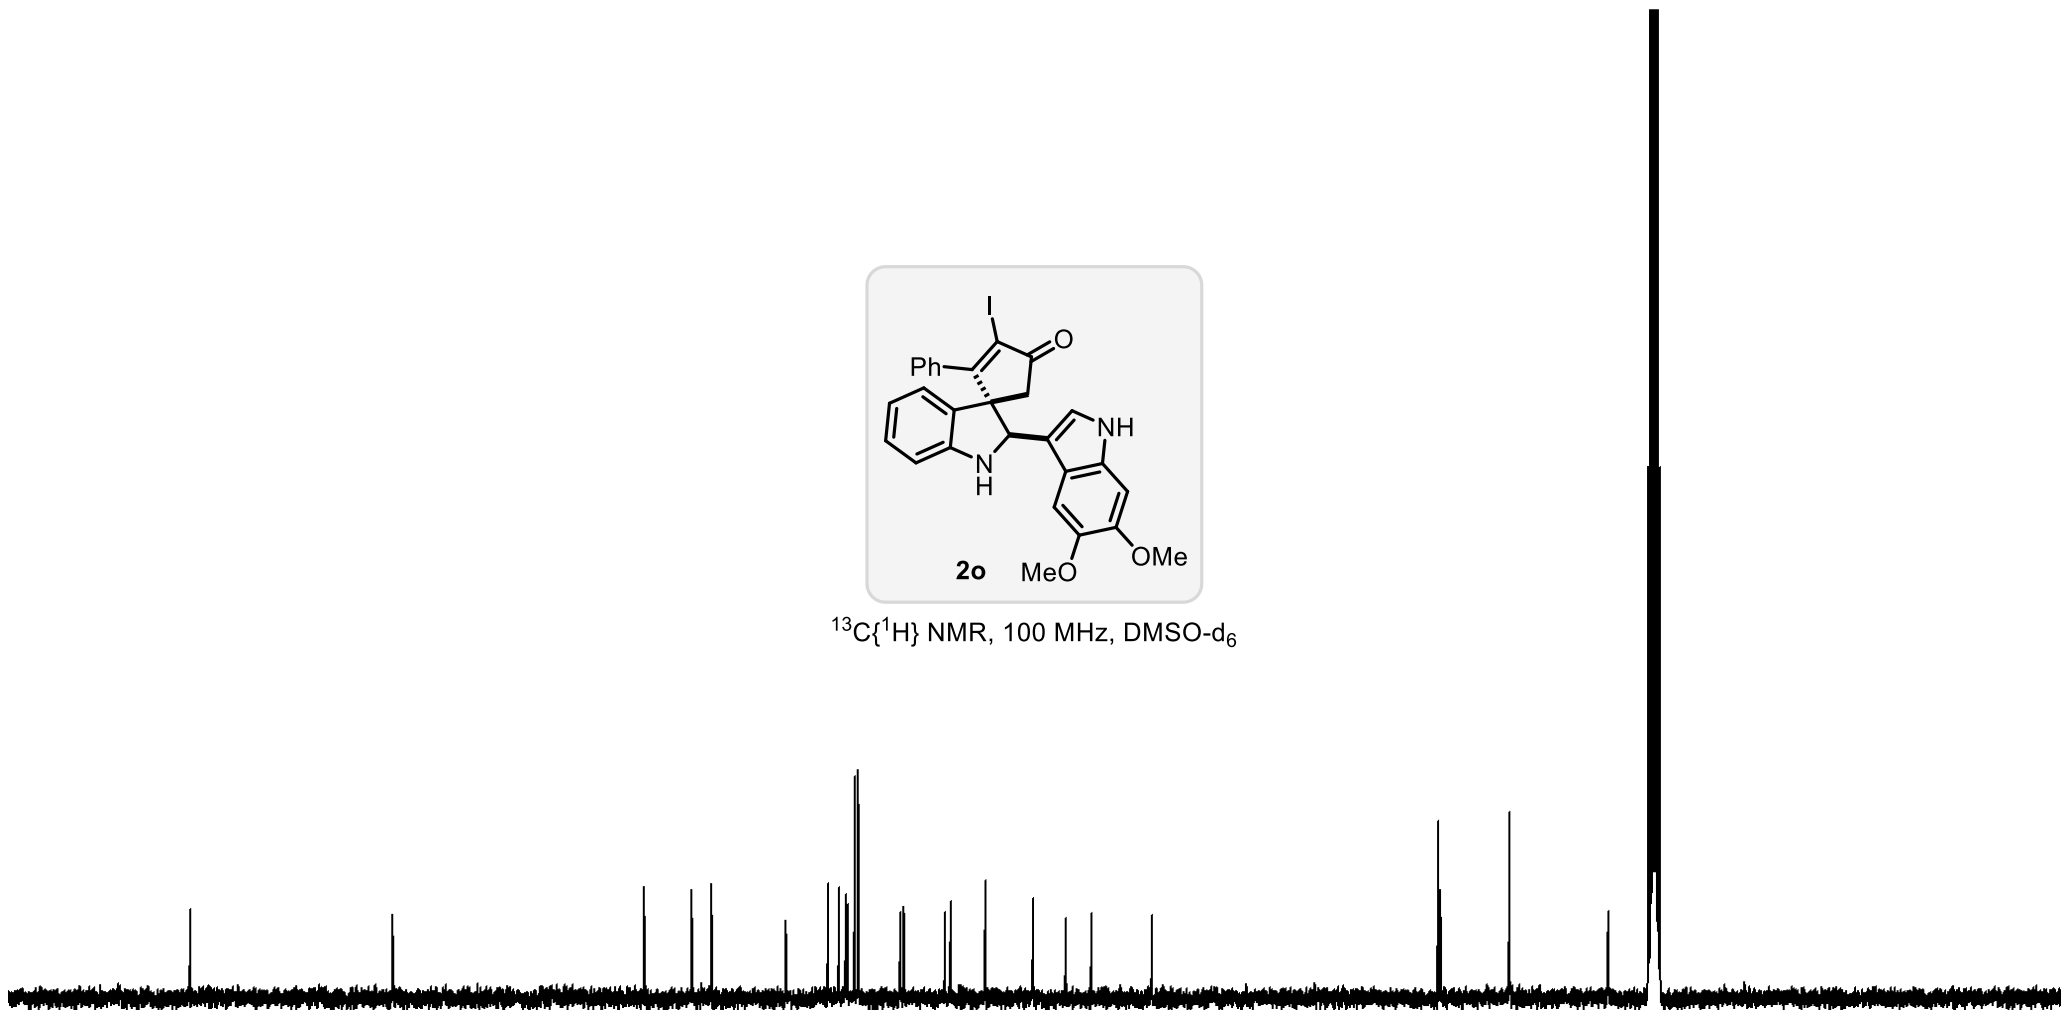

210 200 190 180 170 160 150 140 130 120 110 100 90 80 70 60 50 40 30 20 10 ppm

S-50

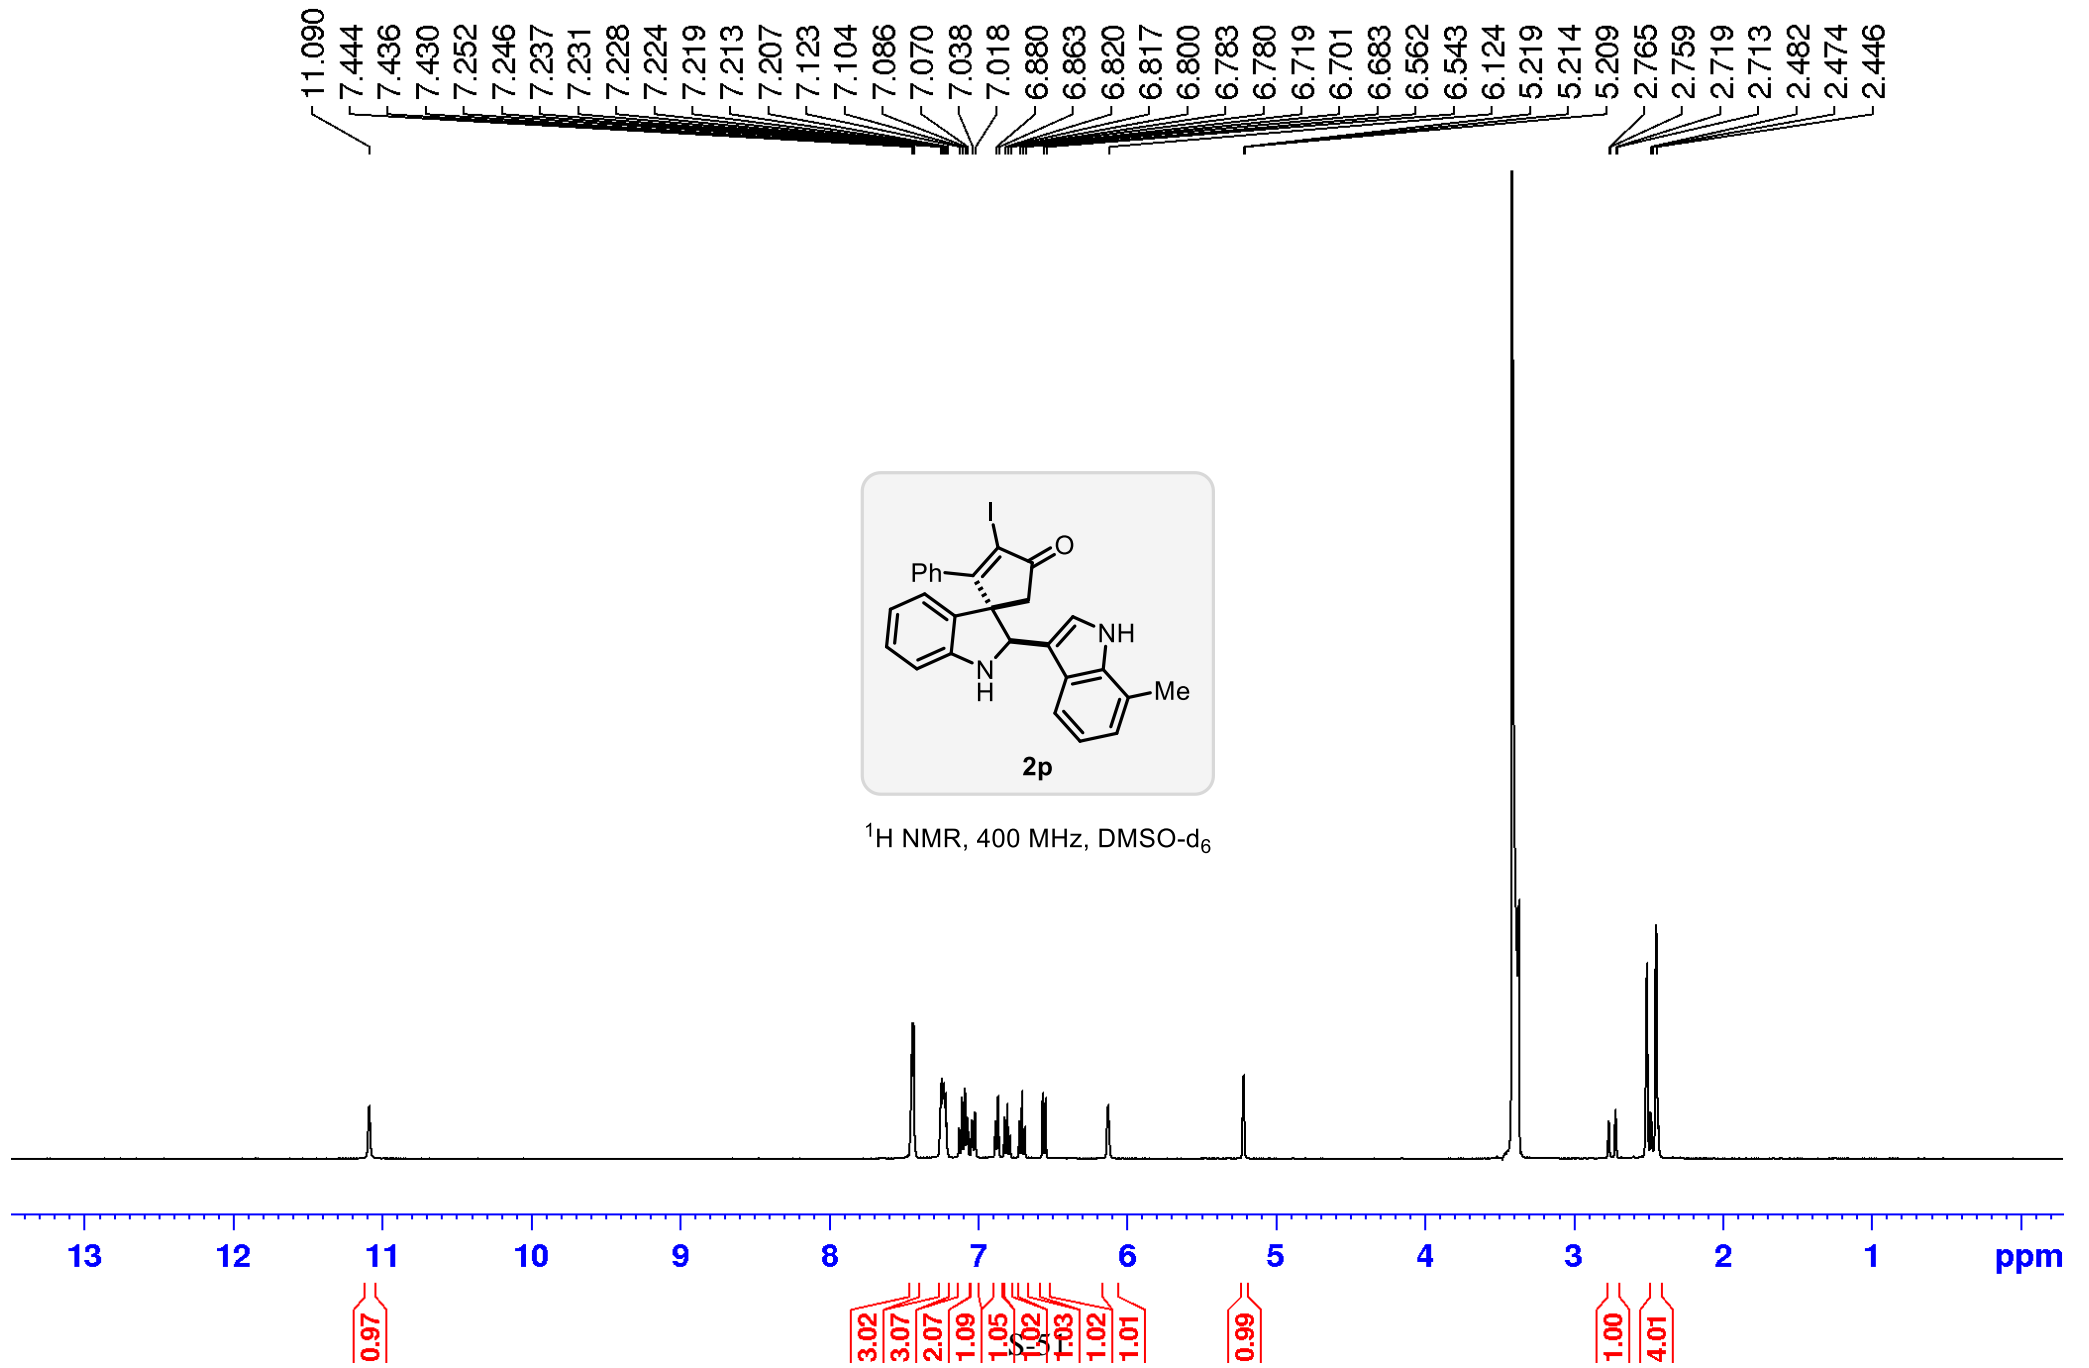

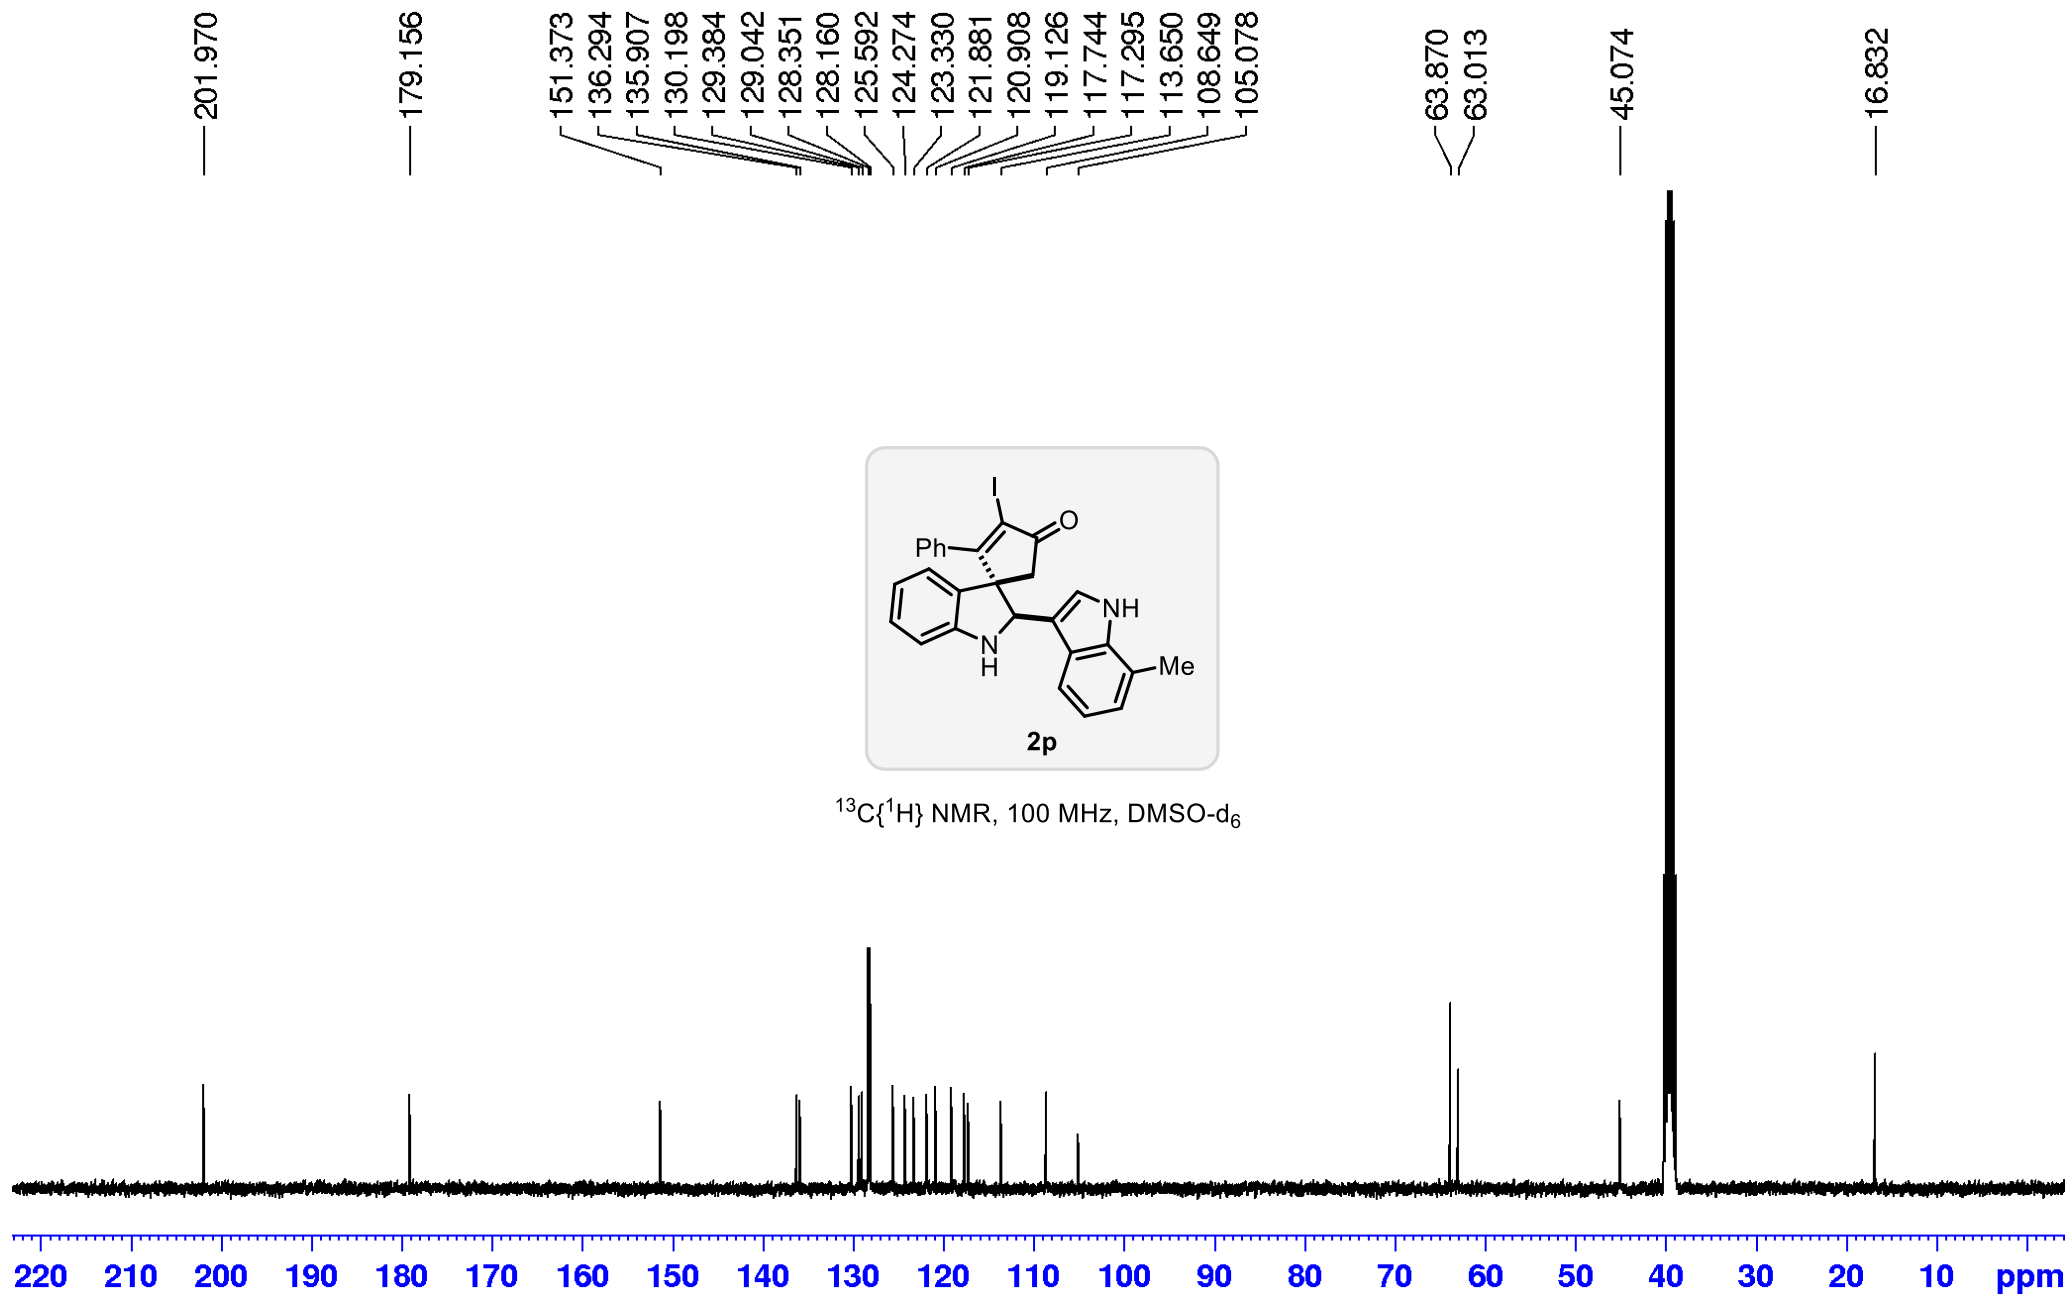

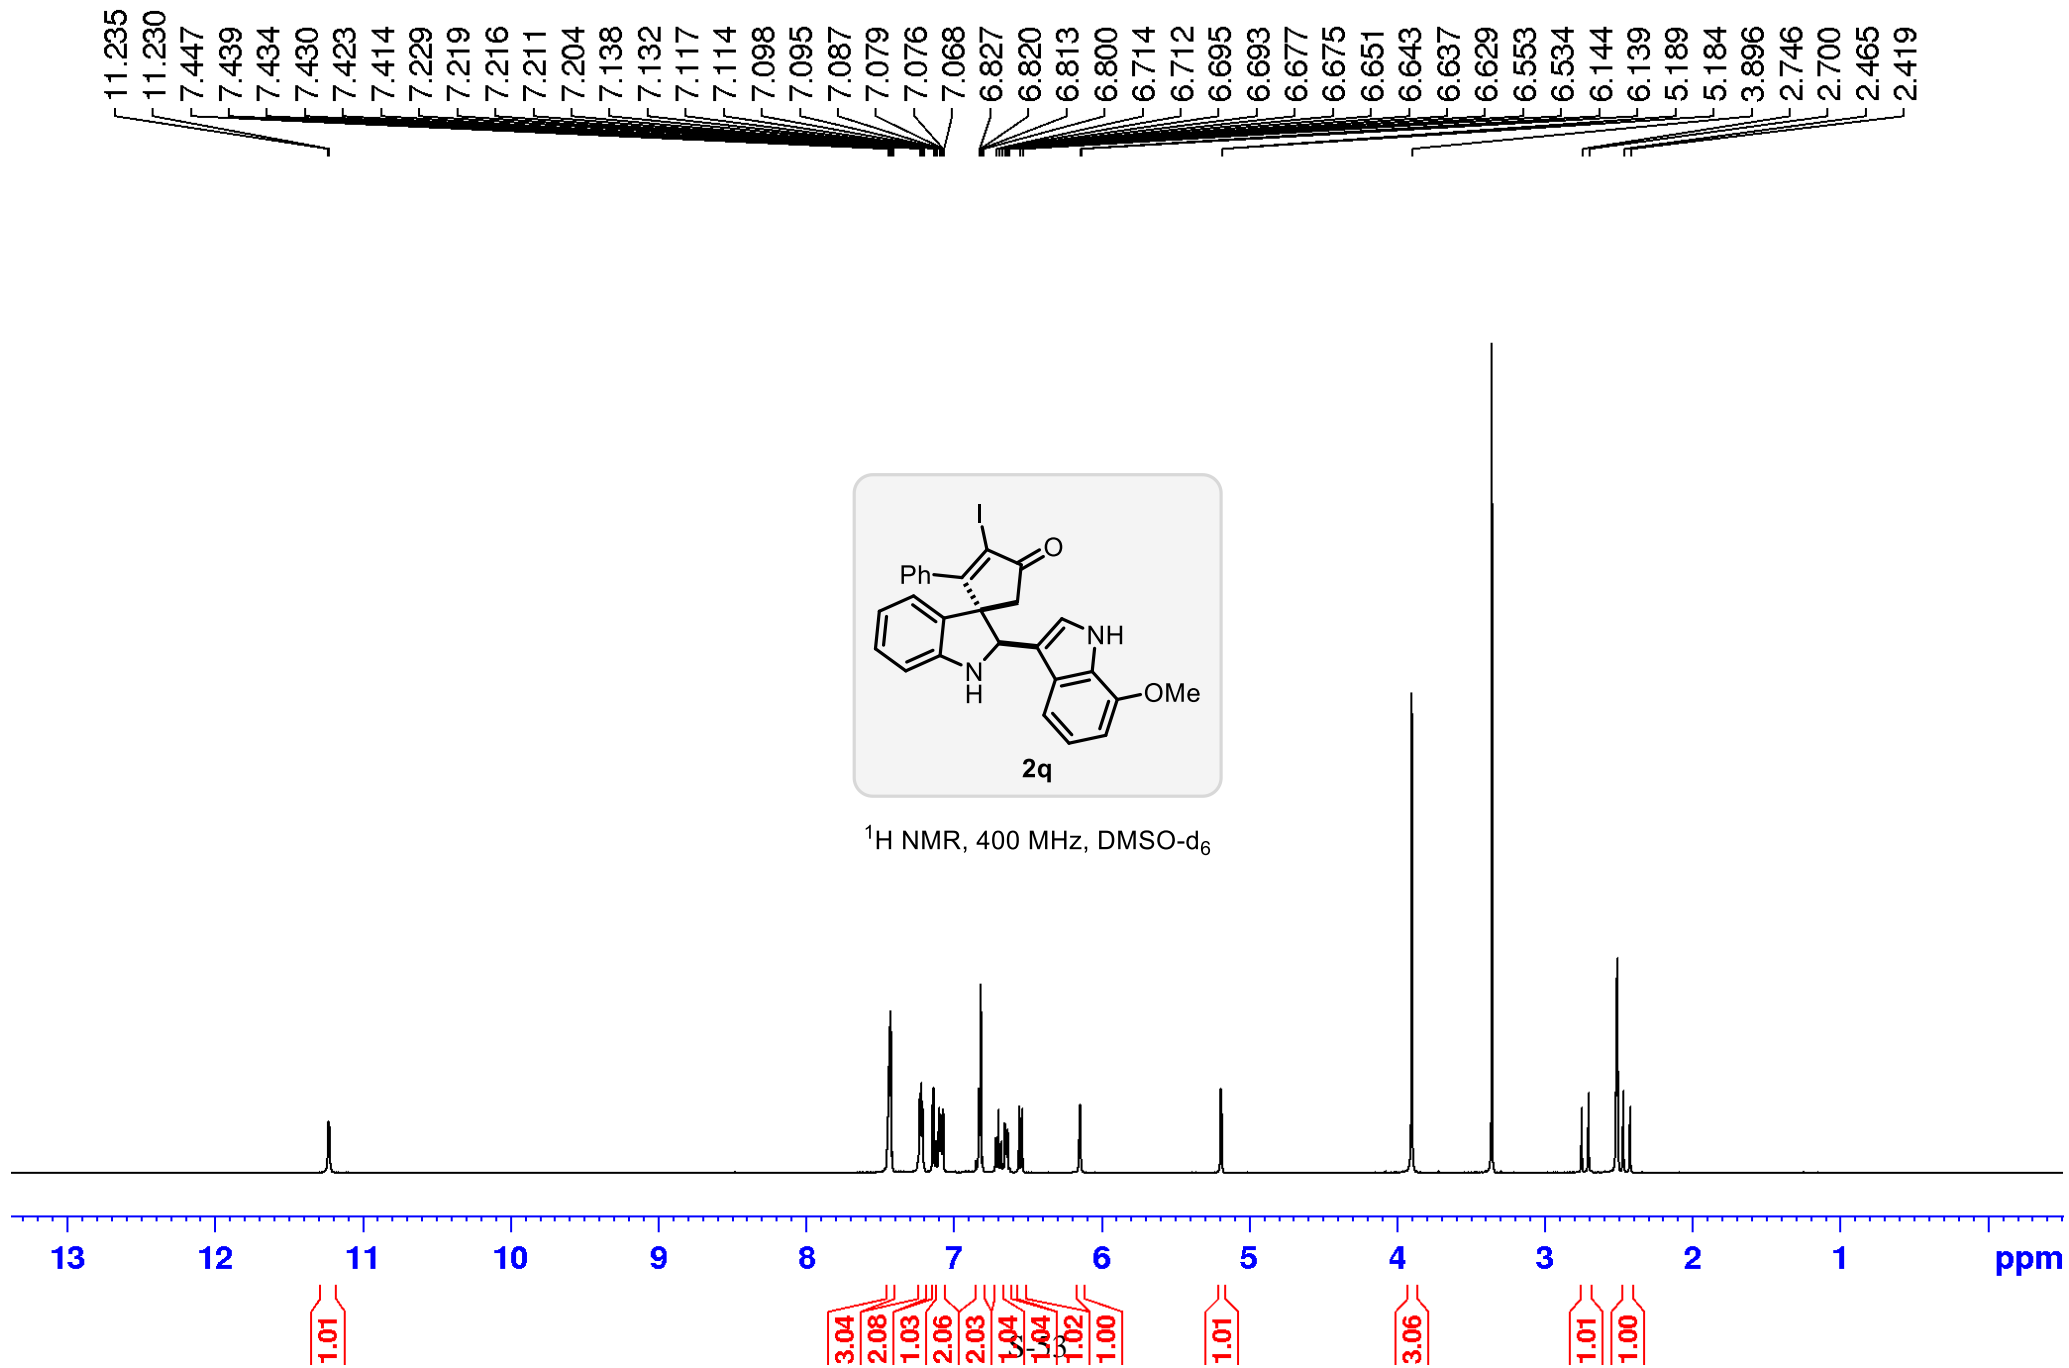

— 201.809

— 179.001

151.313  
146.181  
135.875  
130.113  
129.292  
128.961  
128.292  
128.101  
127.376  
126.815  
123.995  
123.323  
119.483  
117.683  
113.652  
112.446  
108.601  
105.115  
101.766

63.873  
62.888

— 55.067

— 44.960

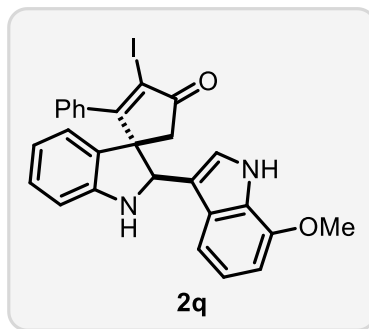

$^{13}\text{C}\{^1\text{H}\}$  NMR, 100 MHz, DMSO- $d_6$

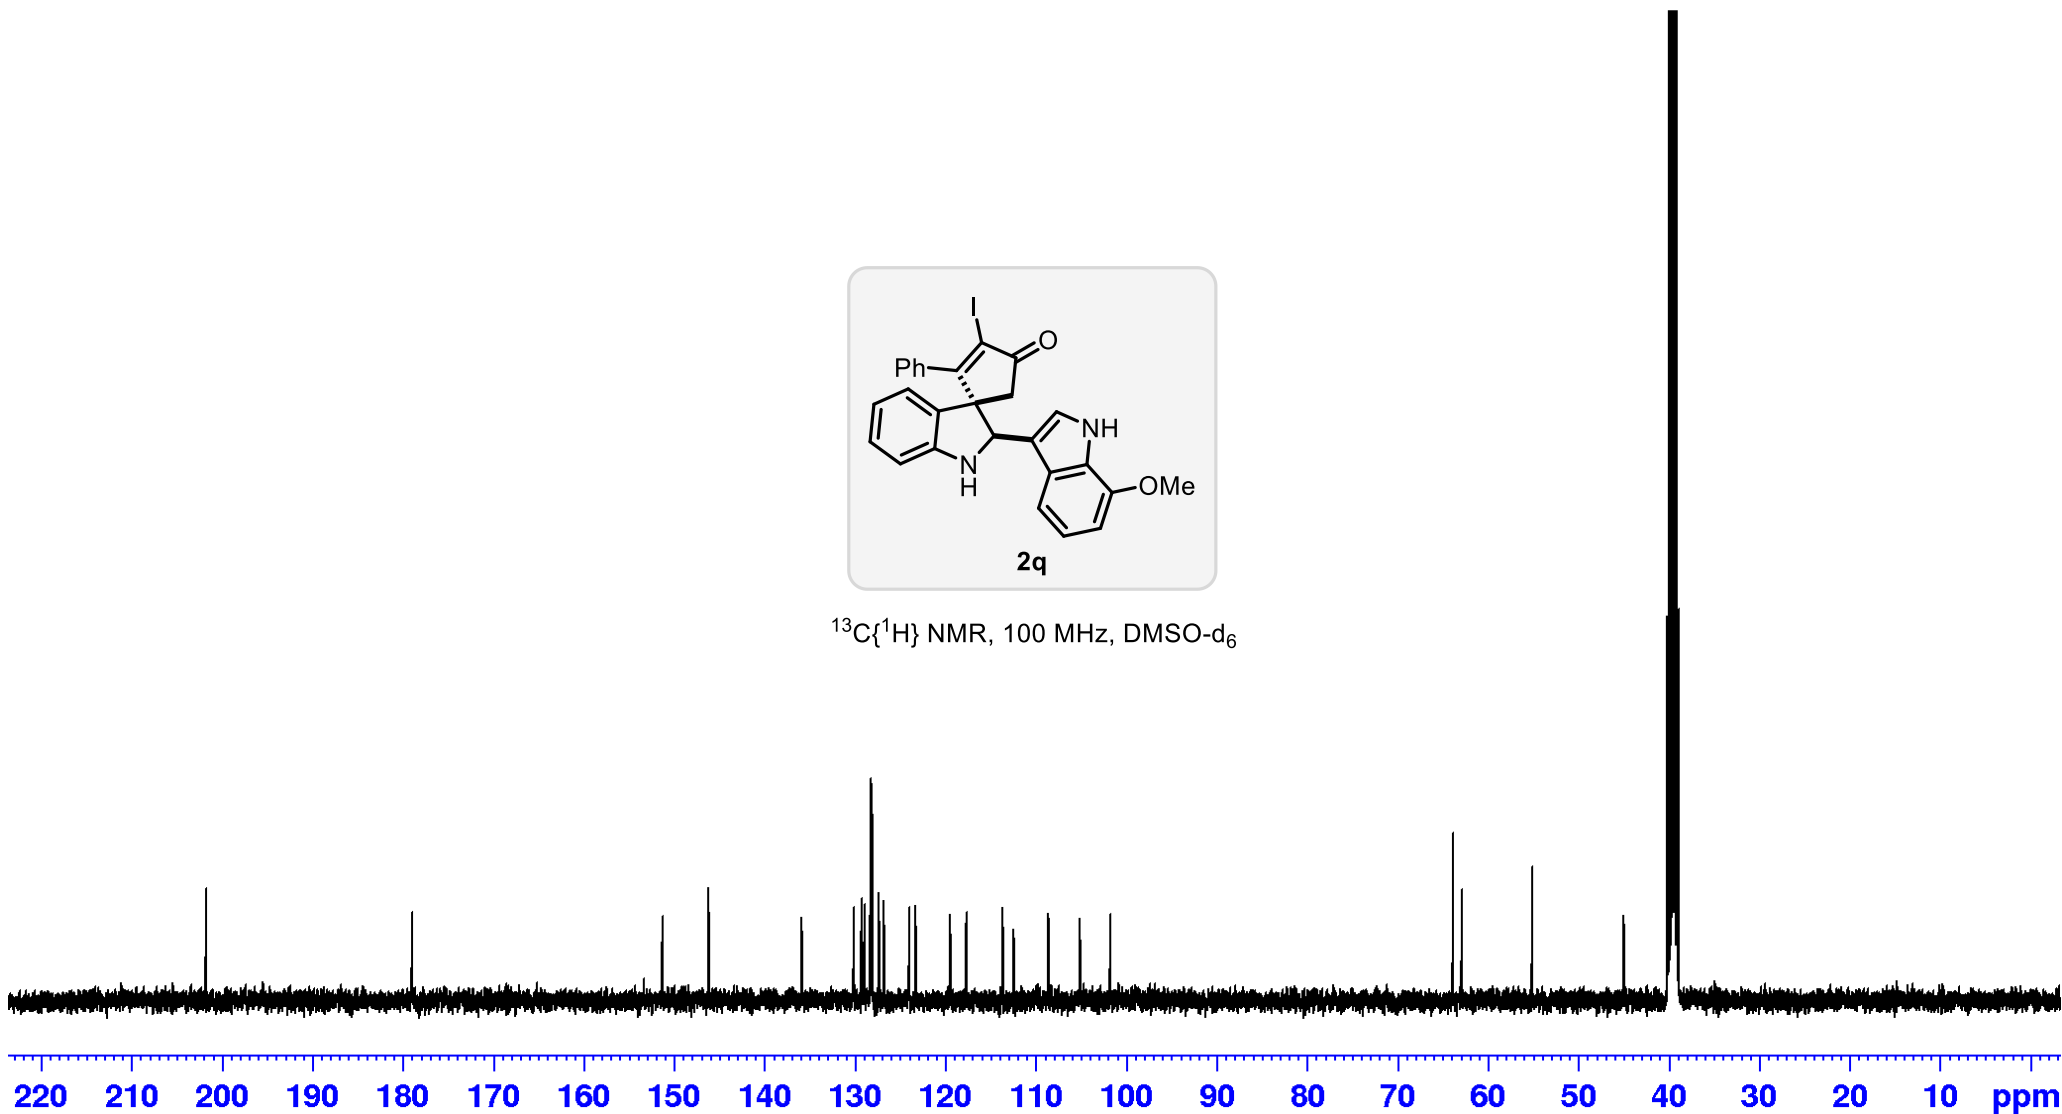

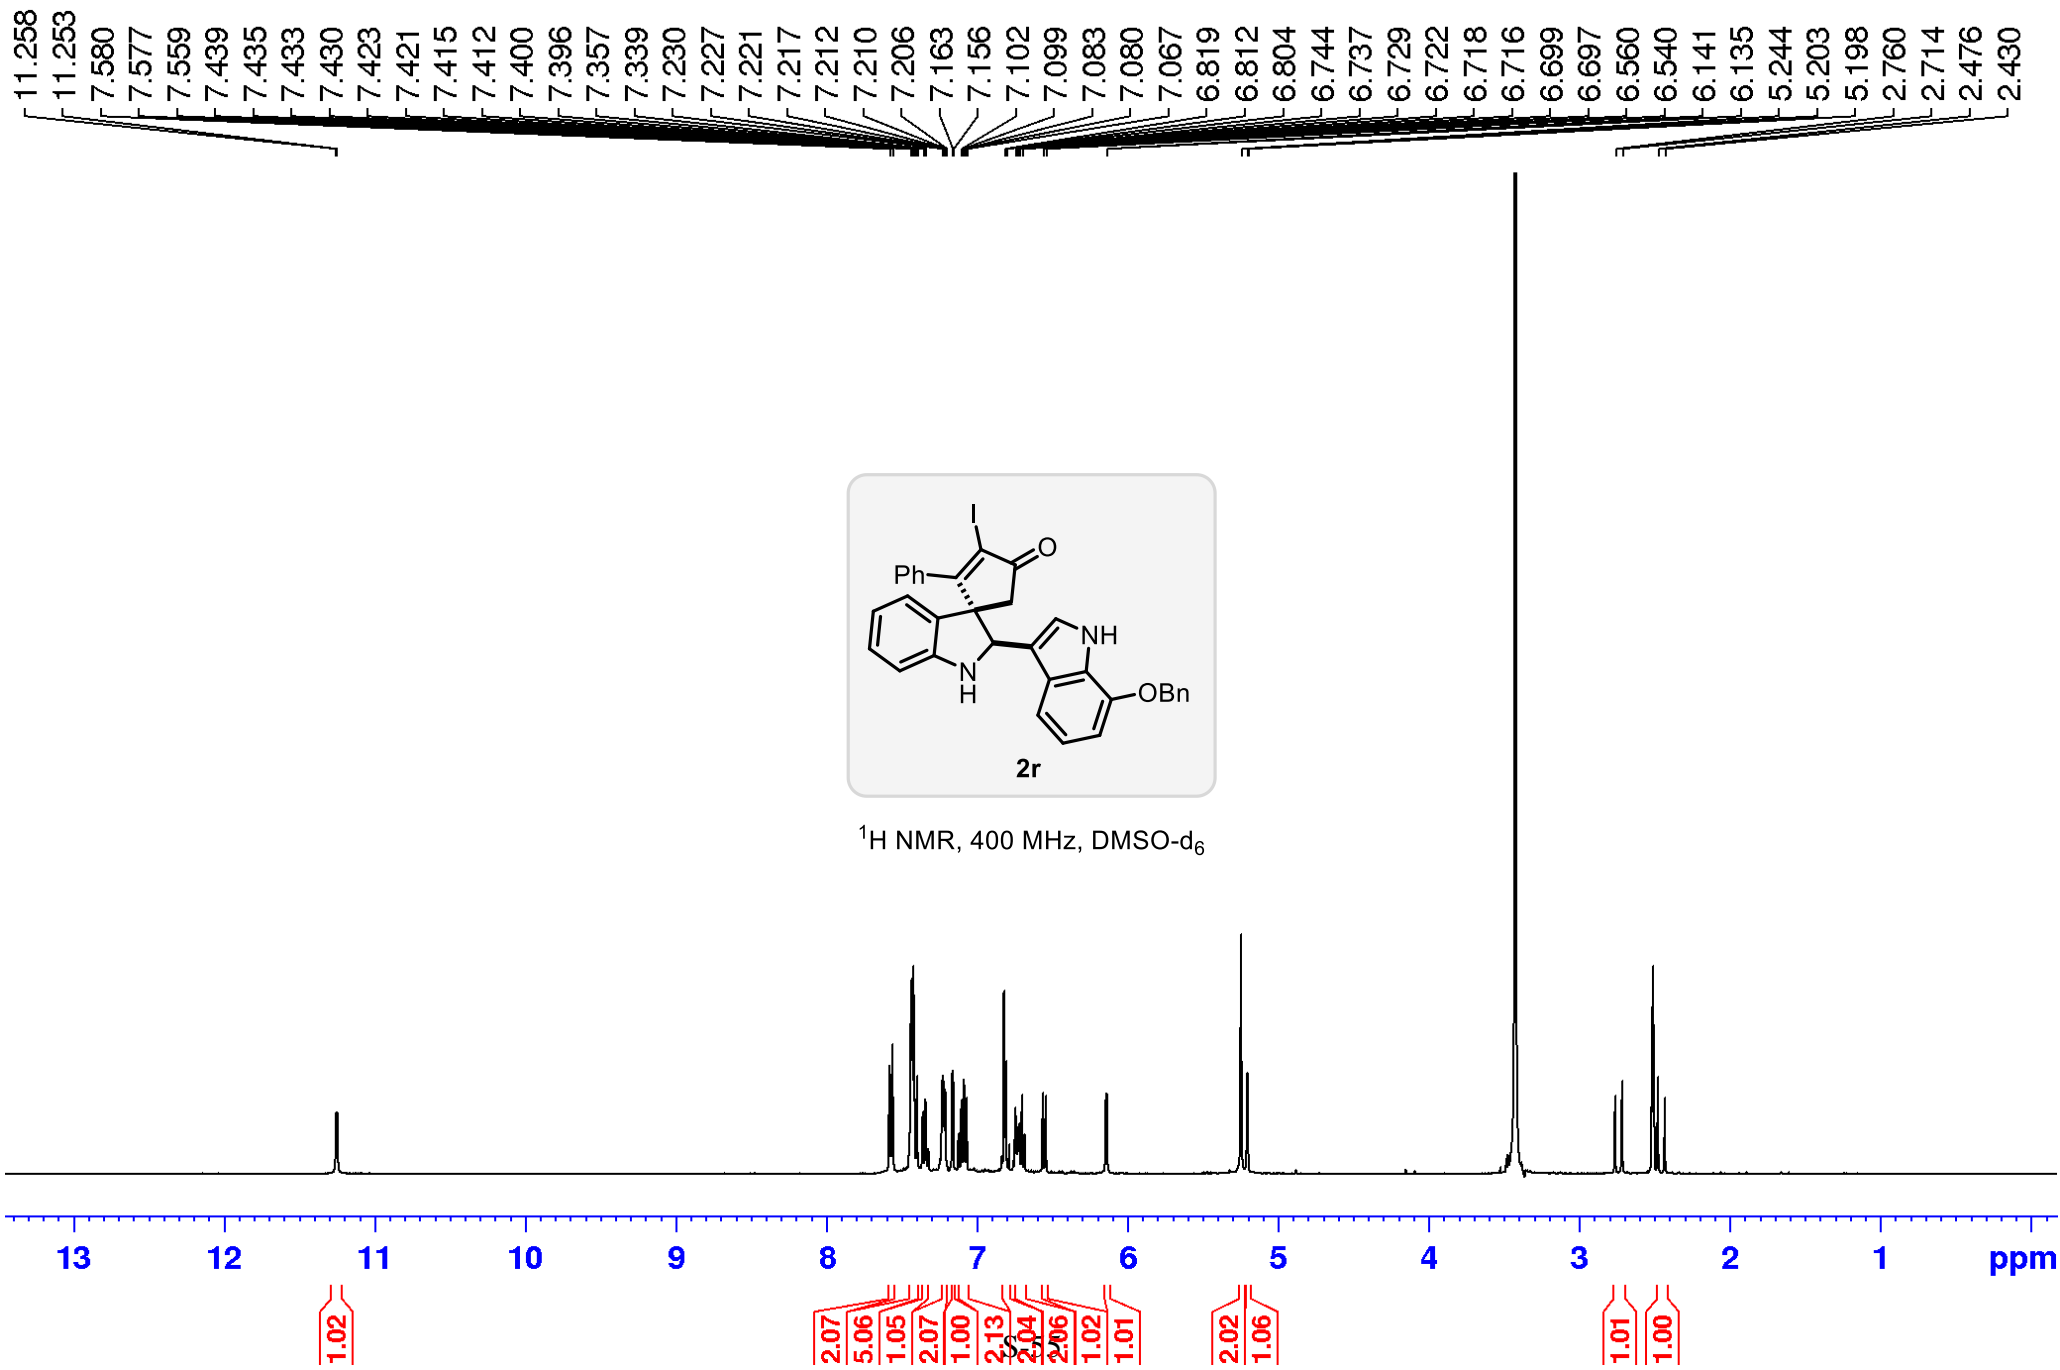

— 201.897

— 179.099

151.337  
145.246  
137.322  
135.904  
130.146  
129.370  
129.041  
128.450  
128.350  
128.139  
127.818  
127.632  
127.609  
127.055  
124.203  
123.363  
119.497  
117.777  
113.765  
112.670  
108.675  
105.125  
103.172

— 69.212  
— 63.910  
— 62.918

— 45.037

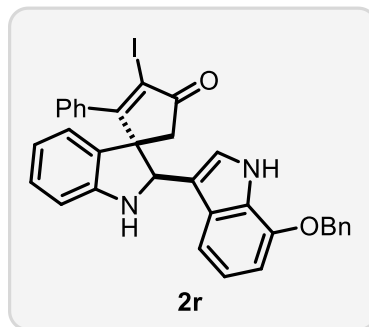

$^{13}\text{C}\{^1\text{H}\}$  NMR, 100 MHz, DMSO- $d_6$

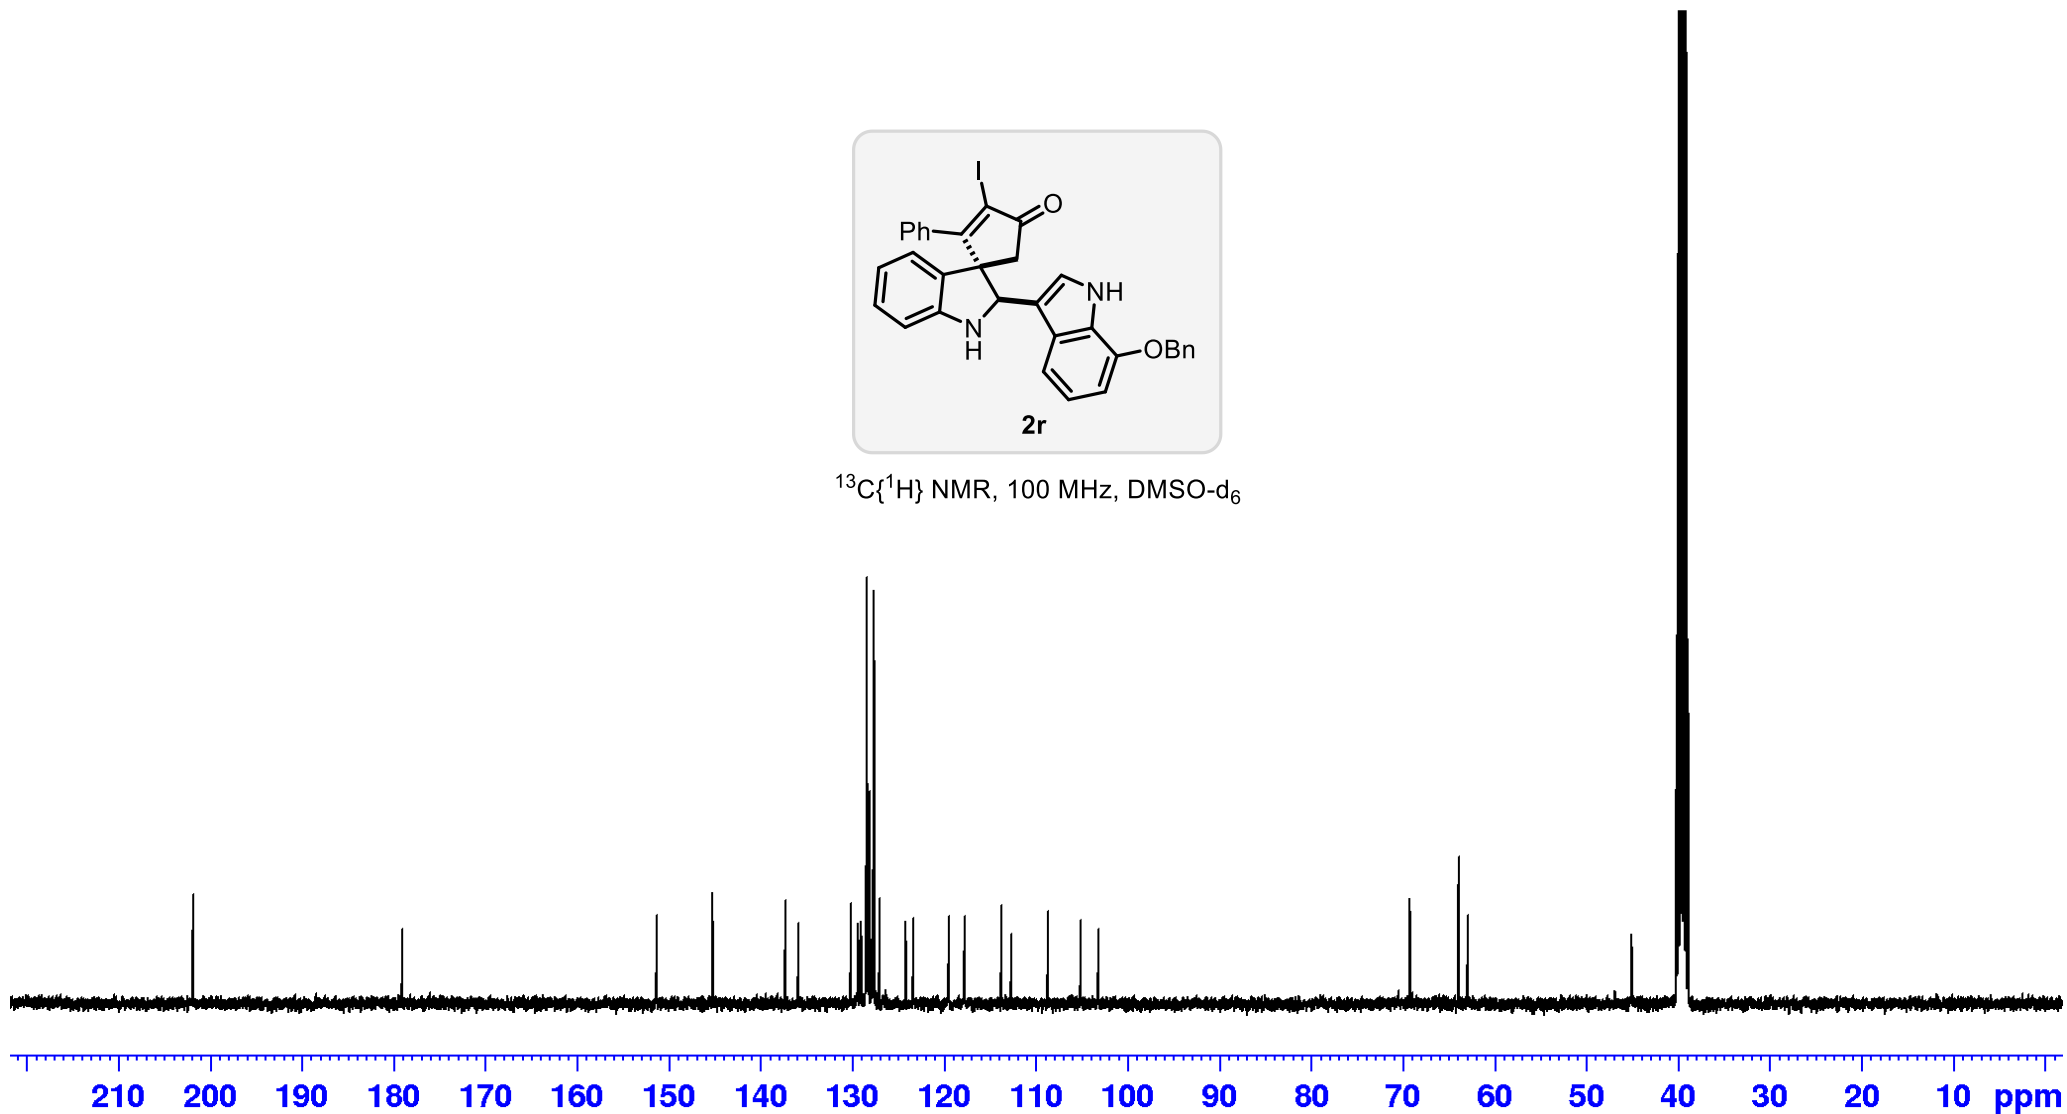

S-56



10.996  
7.442  
7.438  
7.430  
7.425  
7.415  
7.403  
7.266  
7.245  
7.242  
7.237  
7.233  
7.225  
7.220  
7.217  
7.175  
7.171  
7.164  
7.132  
7.113  
7.094  
7.002  
6.984  
6.964  
6.849  
6.831  
6.829  
6.811  
6.690  
6.671  
6.653  
6.554  
6.535  
6.091  
5.246  
2.760  
2.756  
2.710  
2.566  
2.561  
2.151

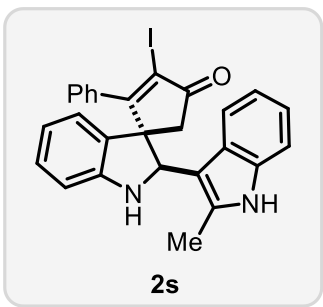

<sup>1</sup>H NMR, 400 MHz, DMSO-d<sub>6</sub>

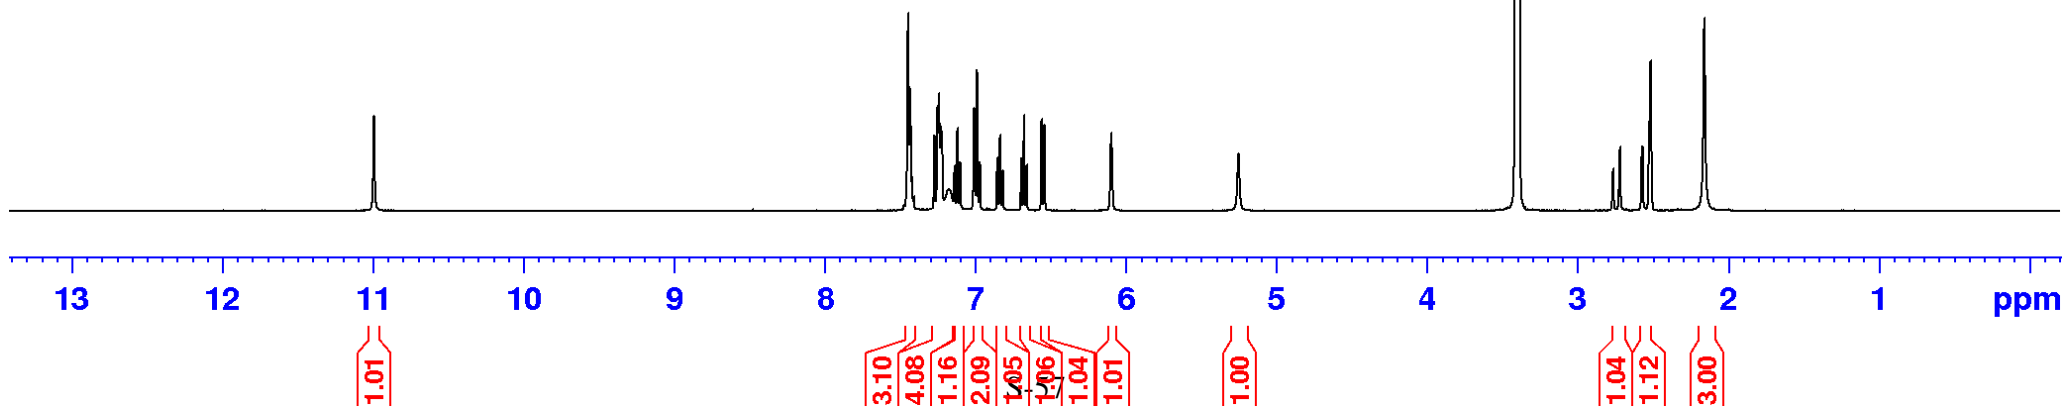

— 202.073

— 178.883

151.376  
135.554  
135.451  
133.864  
130.076  
129.636  
129.200  
128.319  
128.298  
127.215  
123.083  
120.412  
118.696  
117.381  
110.702  
108.389  
108.234  
104.175

— 64.033  
— 62.050

— 45.908

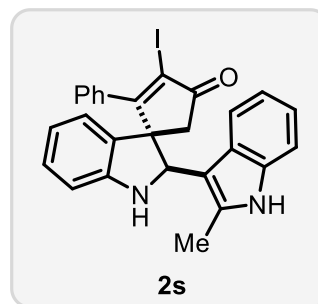

$^{13}\text{C}\{^1\text{H}\}$  NMR, 100 MHz, DMSO- $\text{d}_6$

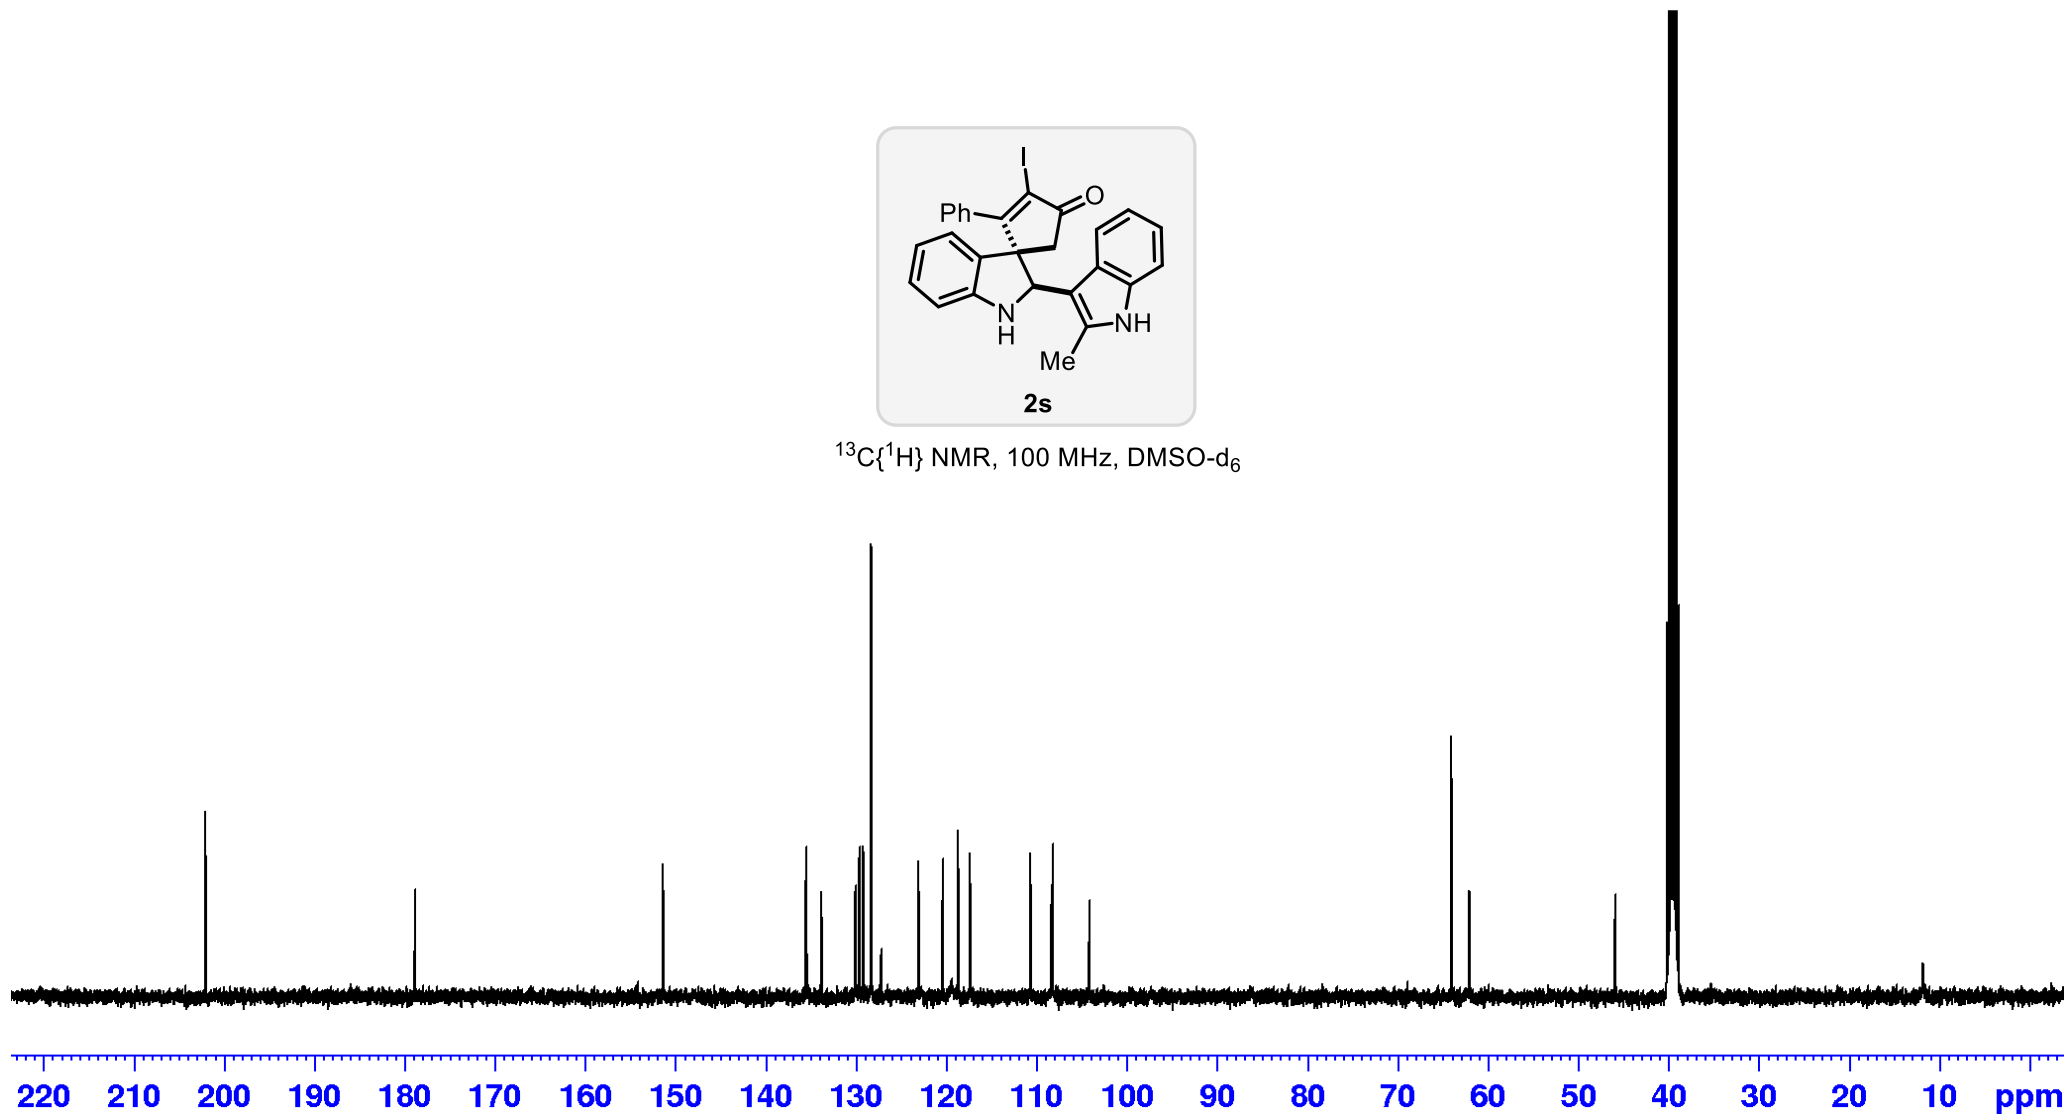

S-58

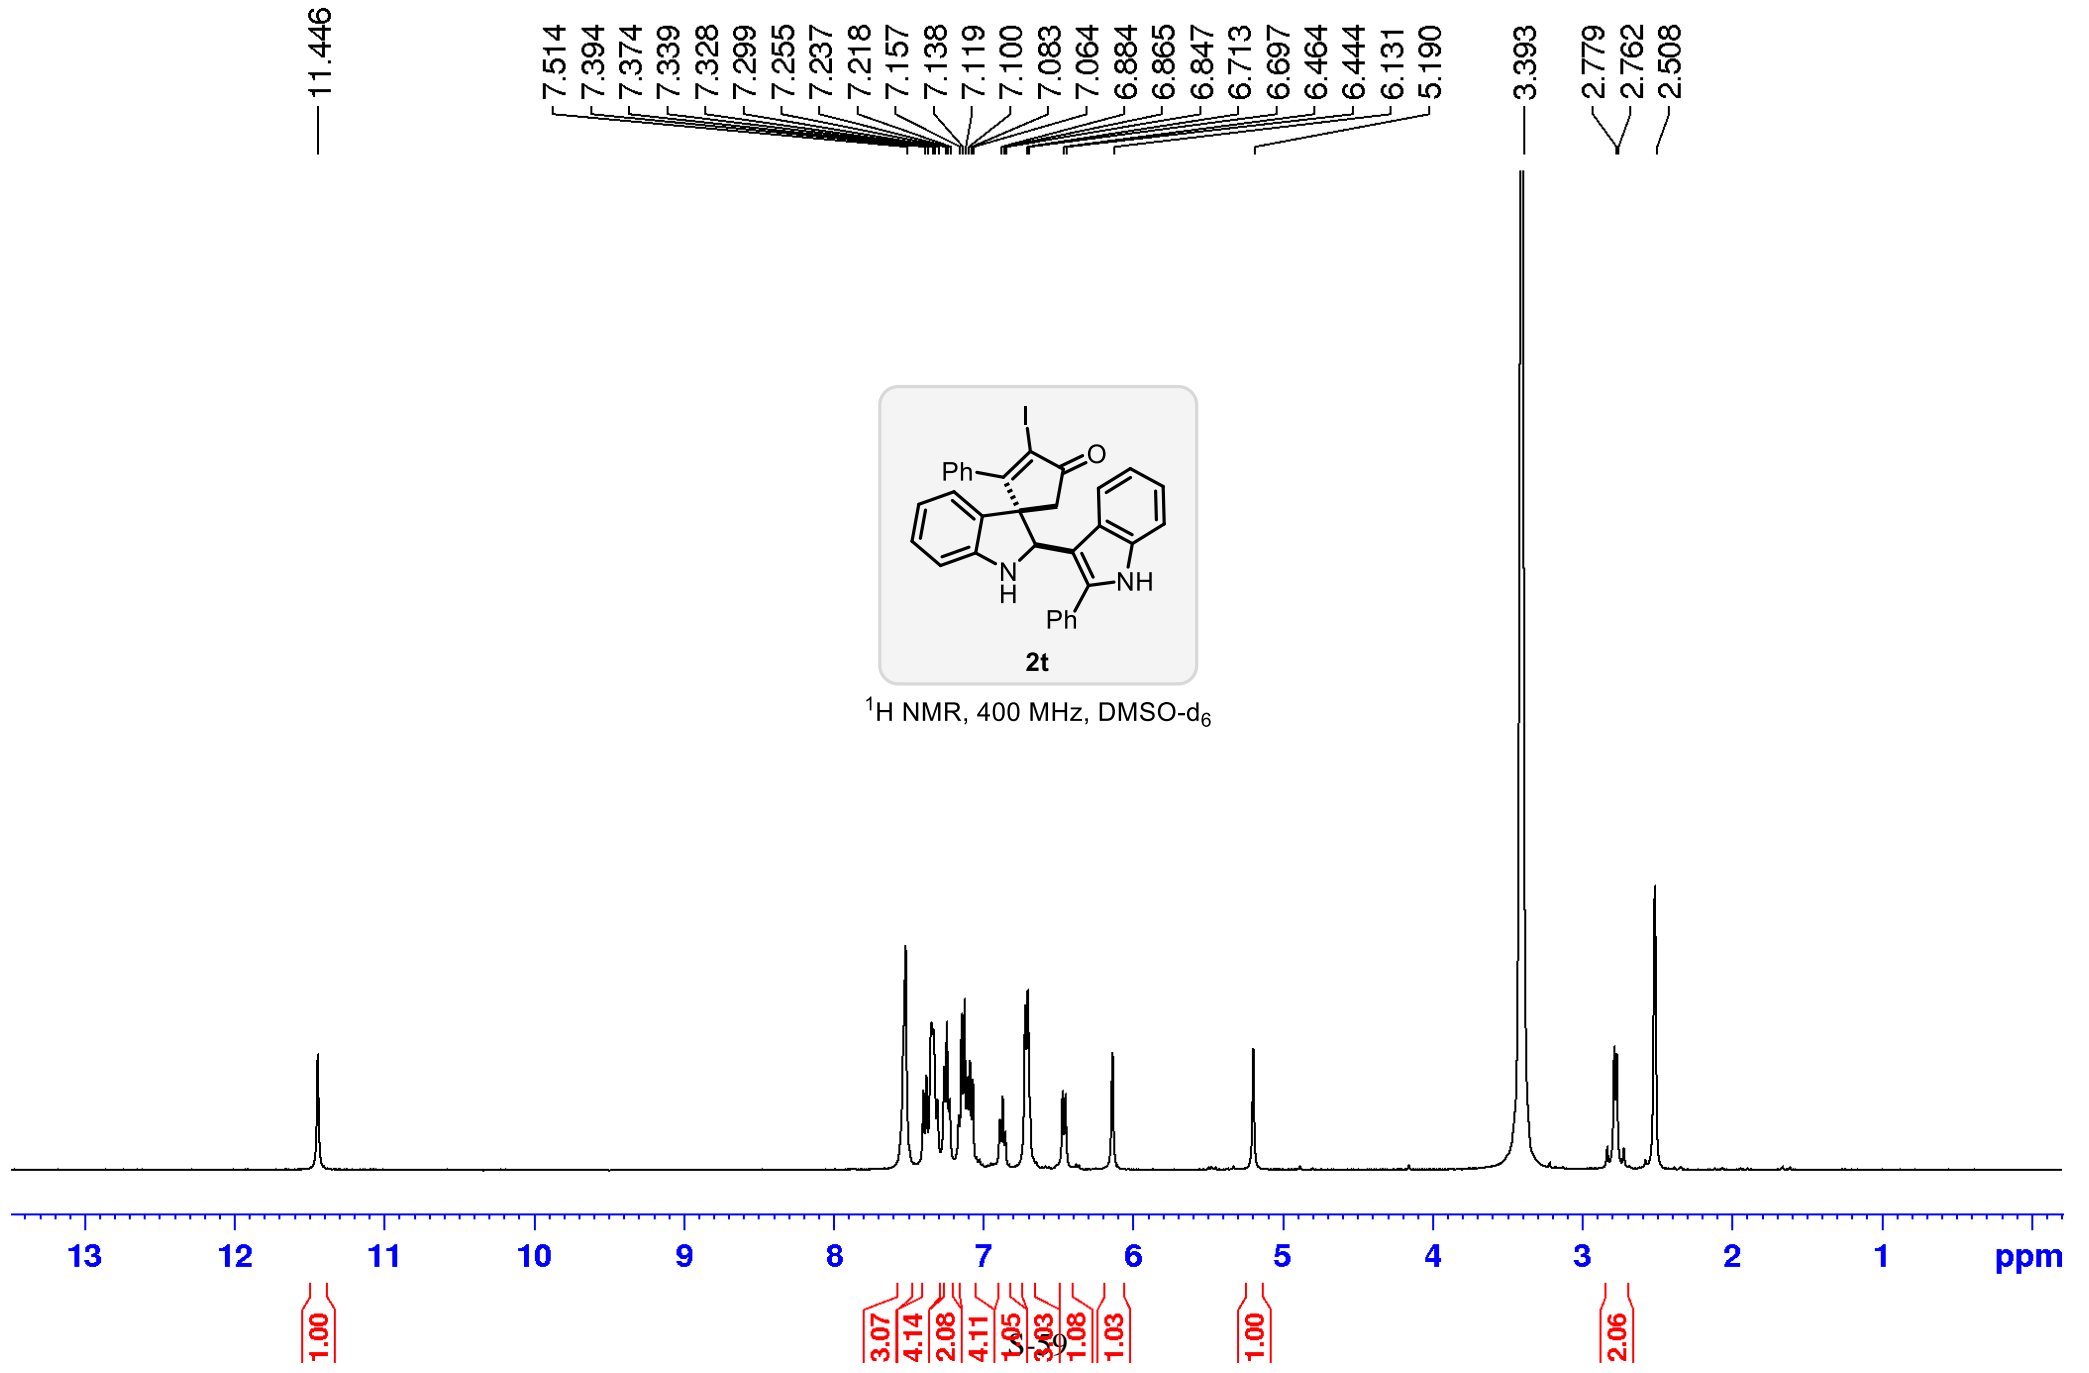

— 202.287

— 179.991

151.818  
137.223  
136.427  
135.311  
131.973  
129.619  
129.259  
128.998  
128.766  
128.419  
128.081  
127.542  
126.487  
123.482  
121.853  
120.642  
119.380  
117.101  
111.598  
111.270  
107.642  
103.963

— 63.595  
— 61.250

— 46.003

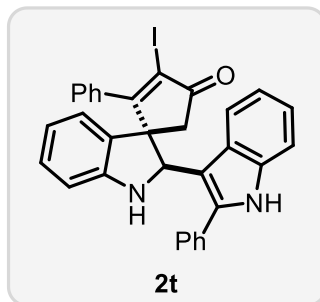

$^{13}\text{C}\{^1\text{H}\}$  NMR, 100 MHz, DMSO- $d_6$

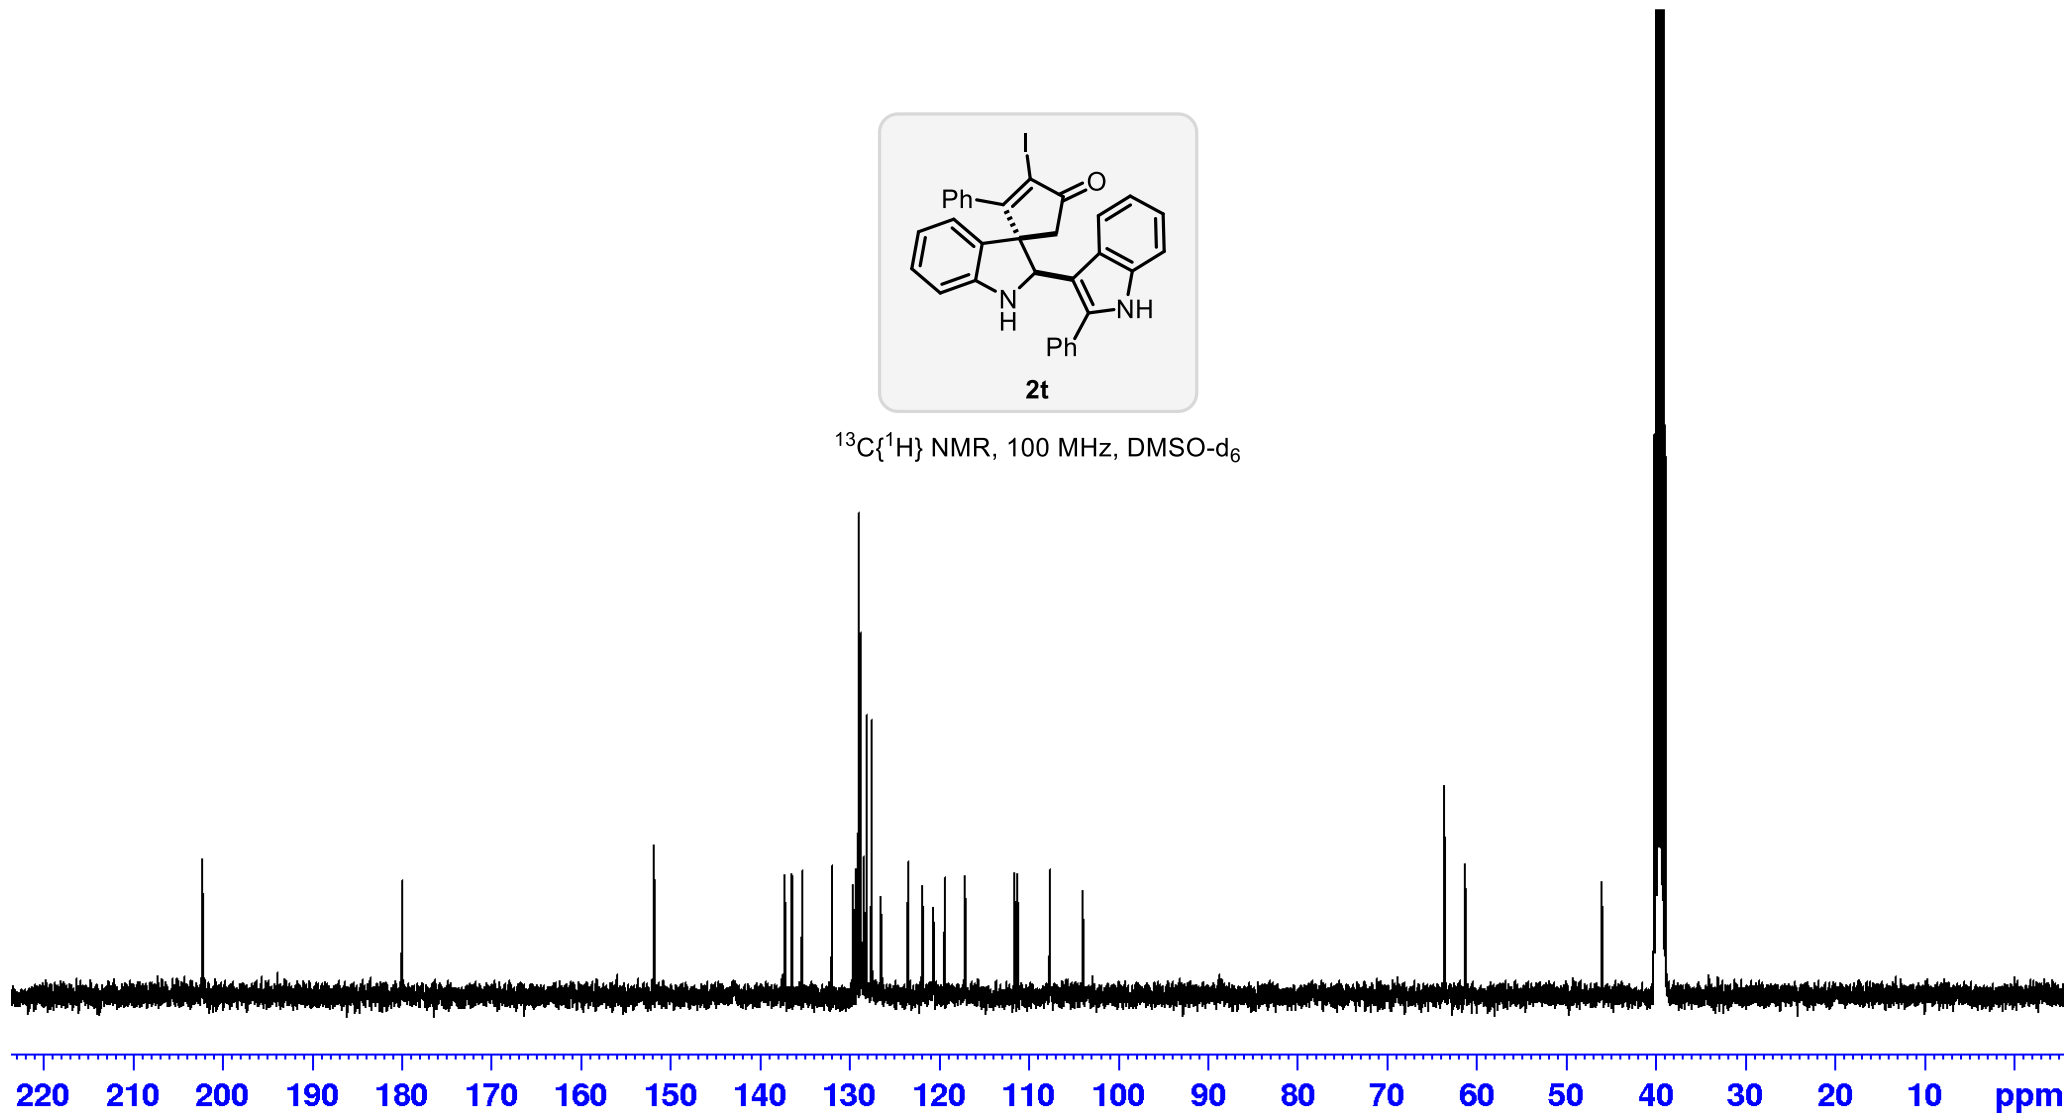

S-60

7.450  
7.446  
7.438  
7.432  
7.409  
7.389  
7.237  
7.233  
7.225  
7.220  
7.213  
7.138  
7.135  
7.119  
7.116  
7.100  
7.097  
7.075  
7.072  
7.057  
7.054  
7.037  
7.034  
6.988  
6.970  
6.887  
6.885  
6.867  
6.850  
6.848  
6.691  
6.689  
6.673  
6.670  
6.654  
6.652  
6.553  
6.534  
6.134  
6.130  
5.281  
4.169  
4.151  
4.143  
4.133  
4.125  
2.701  
2.656  
2.550  
2.176  
1.198  
1.180  
1.162

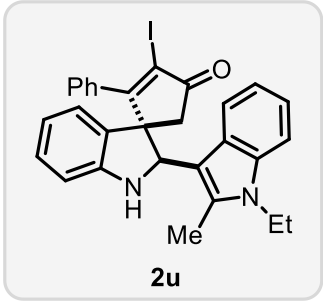

<sup>1</sup>H NMR, 400 MHz, DMSO-d<sub>6</sub>

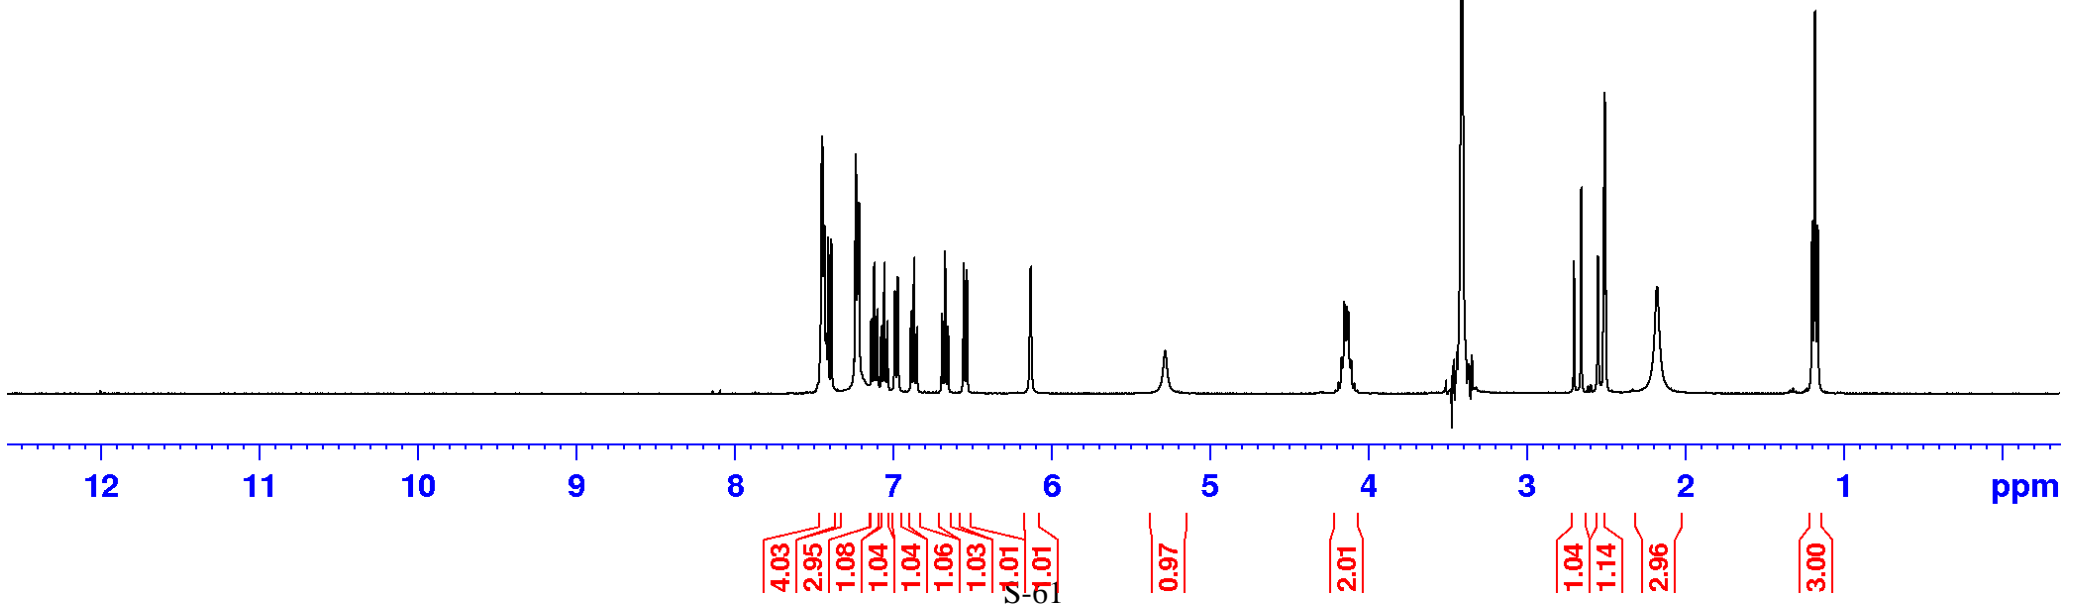

— 201.989

— 178.772

151.360  
135.520  
134.475  
130.011  
129.712  
129.267  
128.372  
128.295  
126.583  
123.102  
120.619  
118.944  
117.442  
109.308  
108.668  
108.261  
104.131

64.080  
62.267

— 45.968

— 37.237

— 15.117

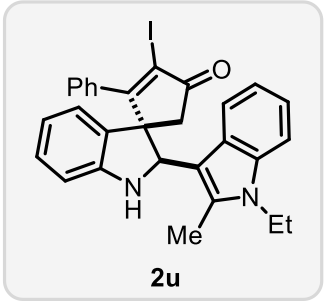

$^{13}\text{C}\{^1\text{H}\}$  NMR, 100 MHz, DMSO- $d_6$

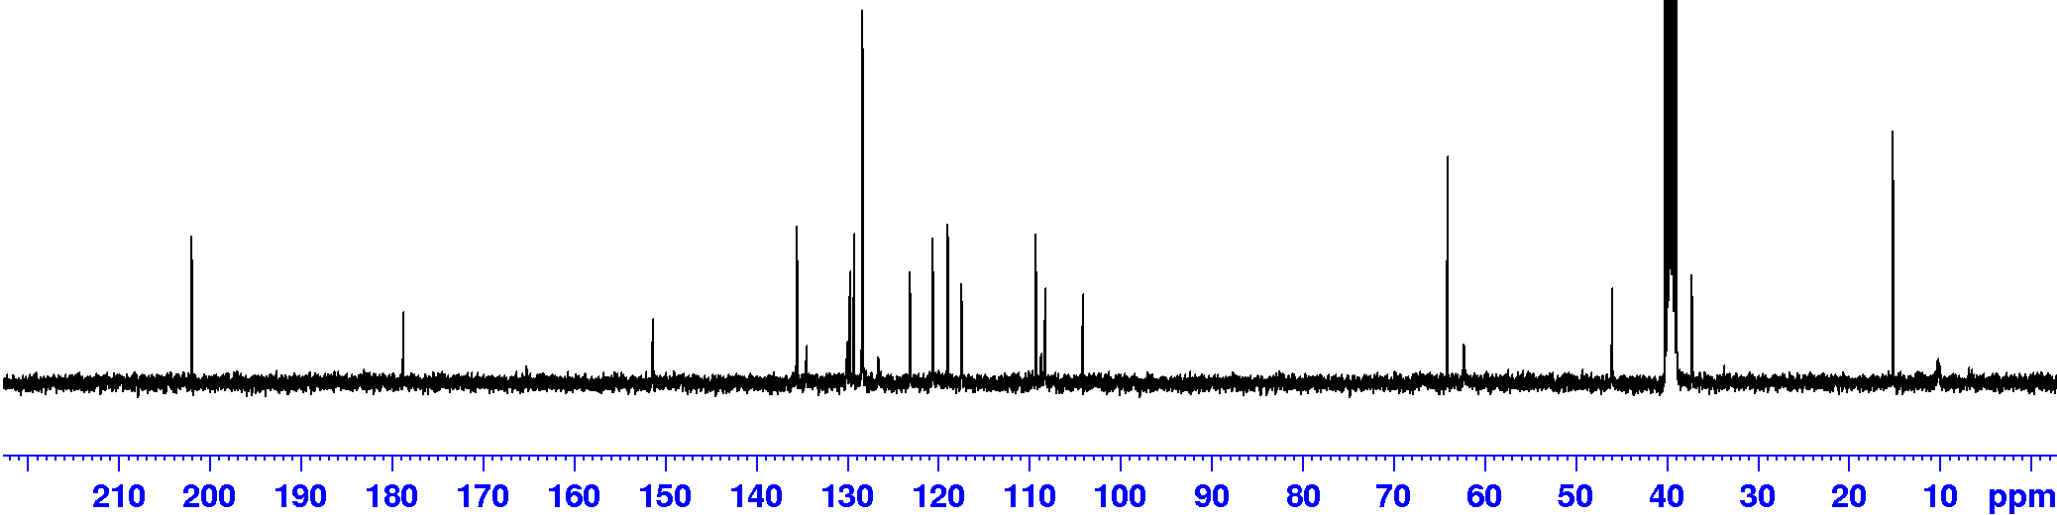

7.451  
7.442  
7.435  
7.430  
7.409  
7.284  
7.236  
7.233  
7.231  
7.227  
7.223  
7.219  
7.212  
7.190  
7.159  
7.141  
7.135  
7.132  
7.120  
7.113  
7.096  
7.094  
7.085  
7.067  
6.955  
6.937  
6.919  
6.917  
6.730  
6.712  
6.693  
6.570  
6.550  
6.146  
5.204  
5.199  
2.778  
2.732  
2.448

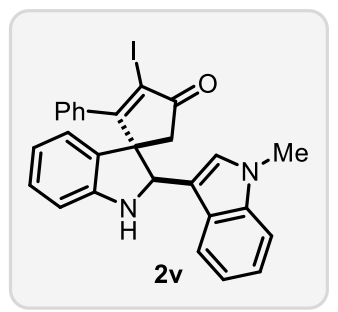

<sup>1</sup>H NMR, 400 MHz, DMSO-d<sub>6</sub>

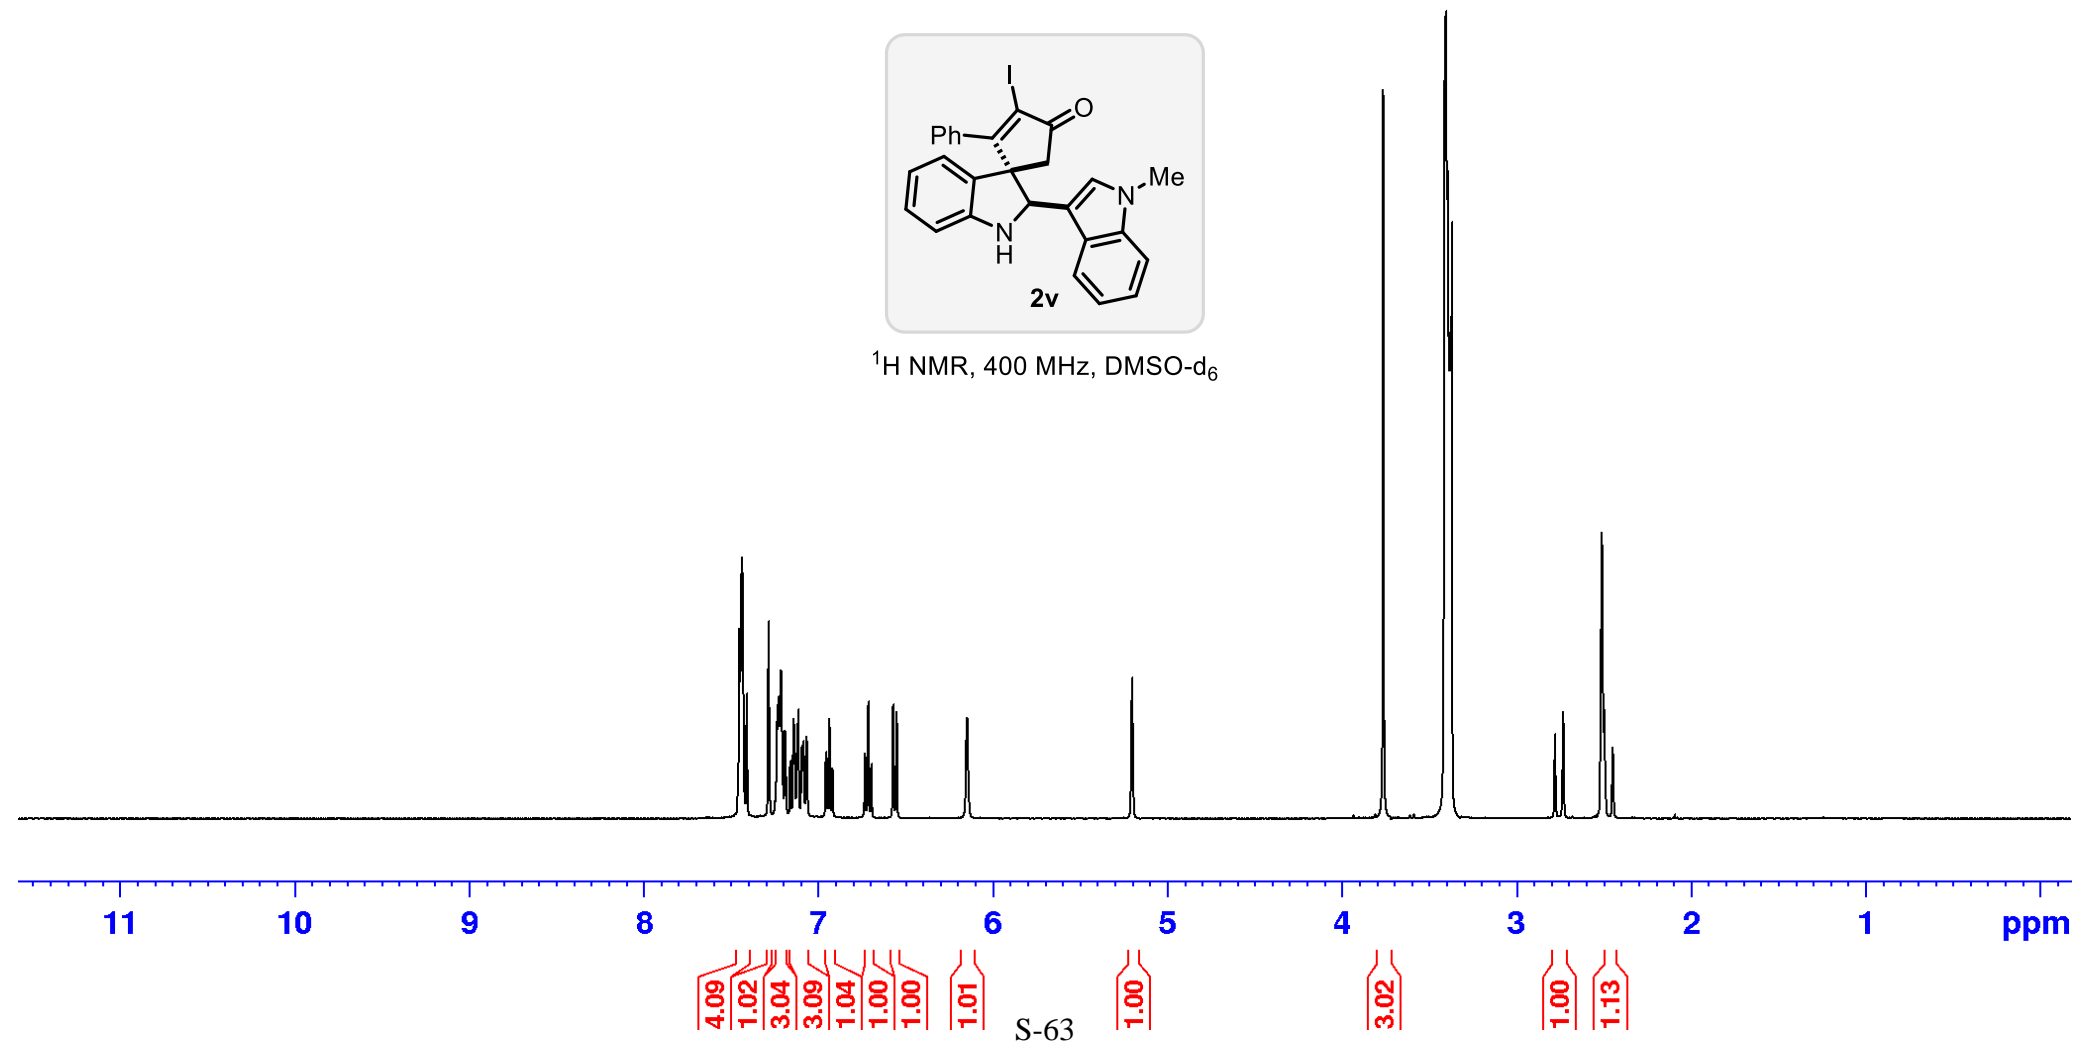

— 201.908

— 179.035

151.235  
137.137  
135.863  
130.204  
129.395  
129.056  
128.903  
128.359  
128.127  
126.235  
123.271  
121.429  
119.778  
119.022  
117.836  
112.281  
110.074  
108.689  
105.091

63.825  
62.746

— 45.056

— 32.461

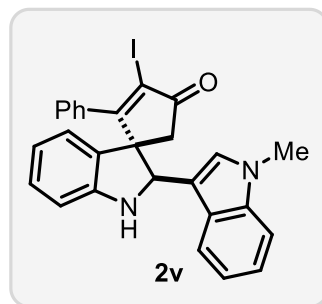

$^{13}\text{C}\{^1\text{H}\}$  NMR, 100 MHz, DMSO- $d_6$

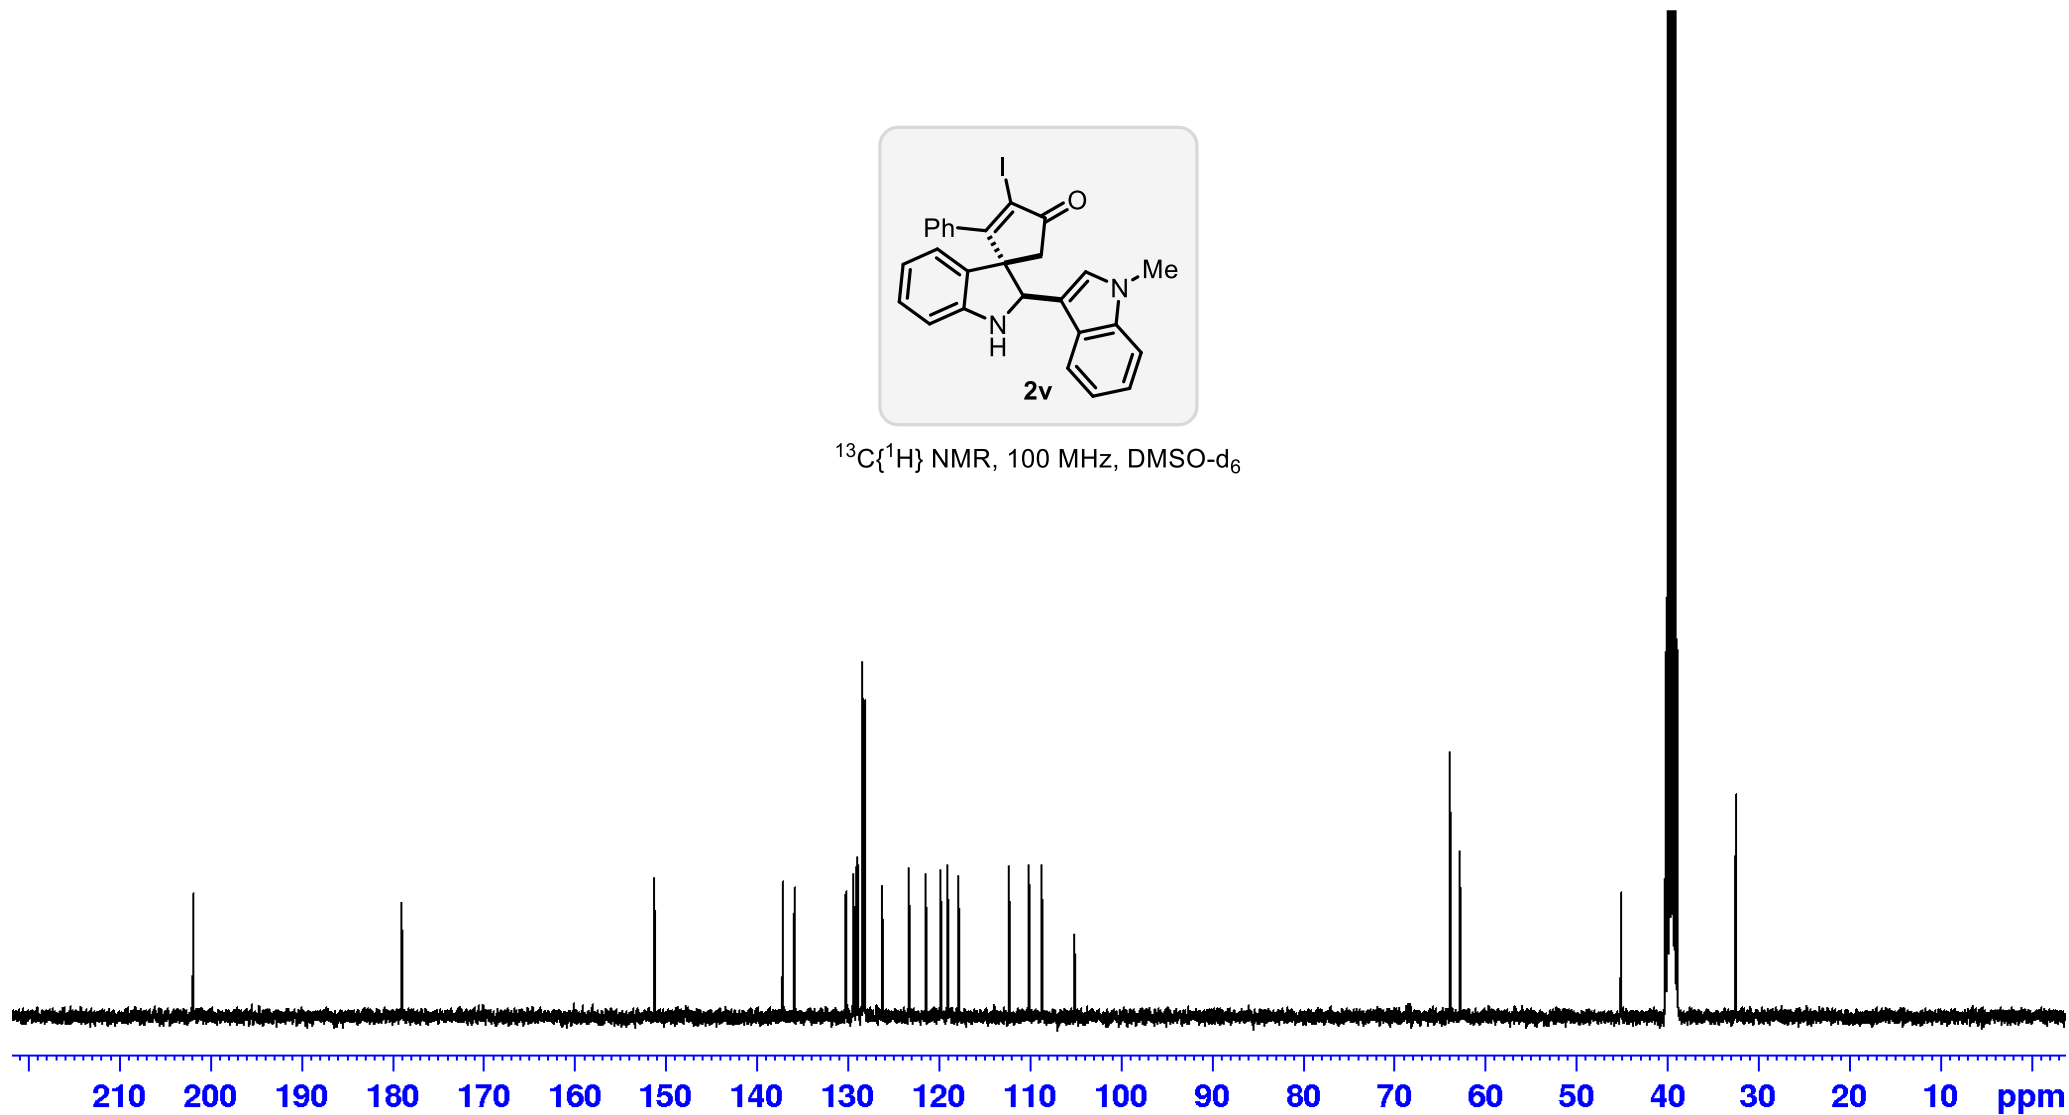

S-64



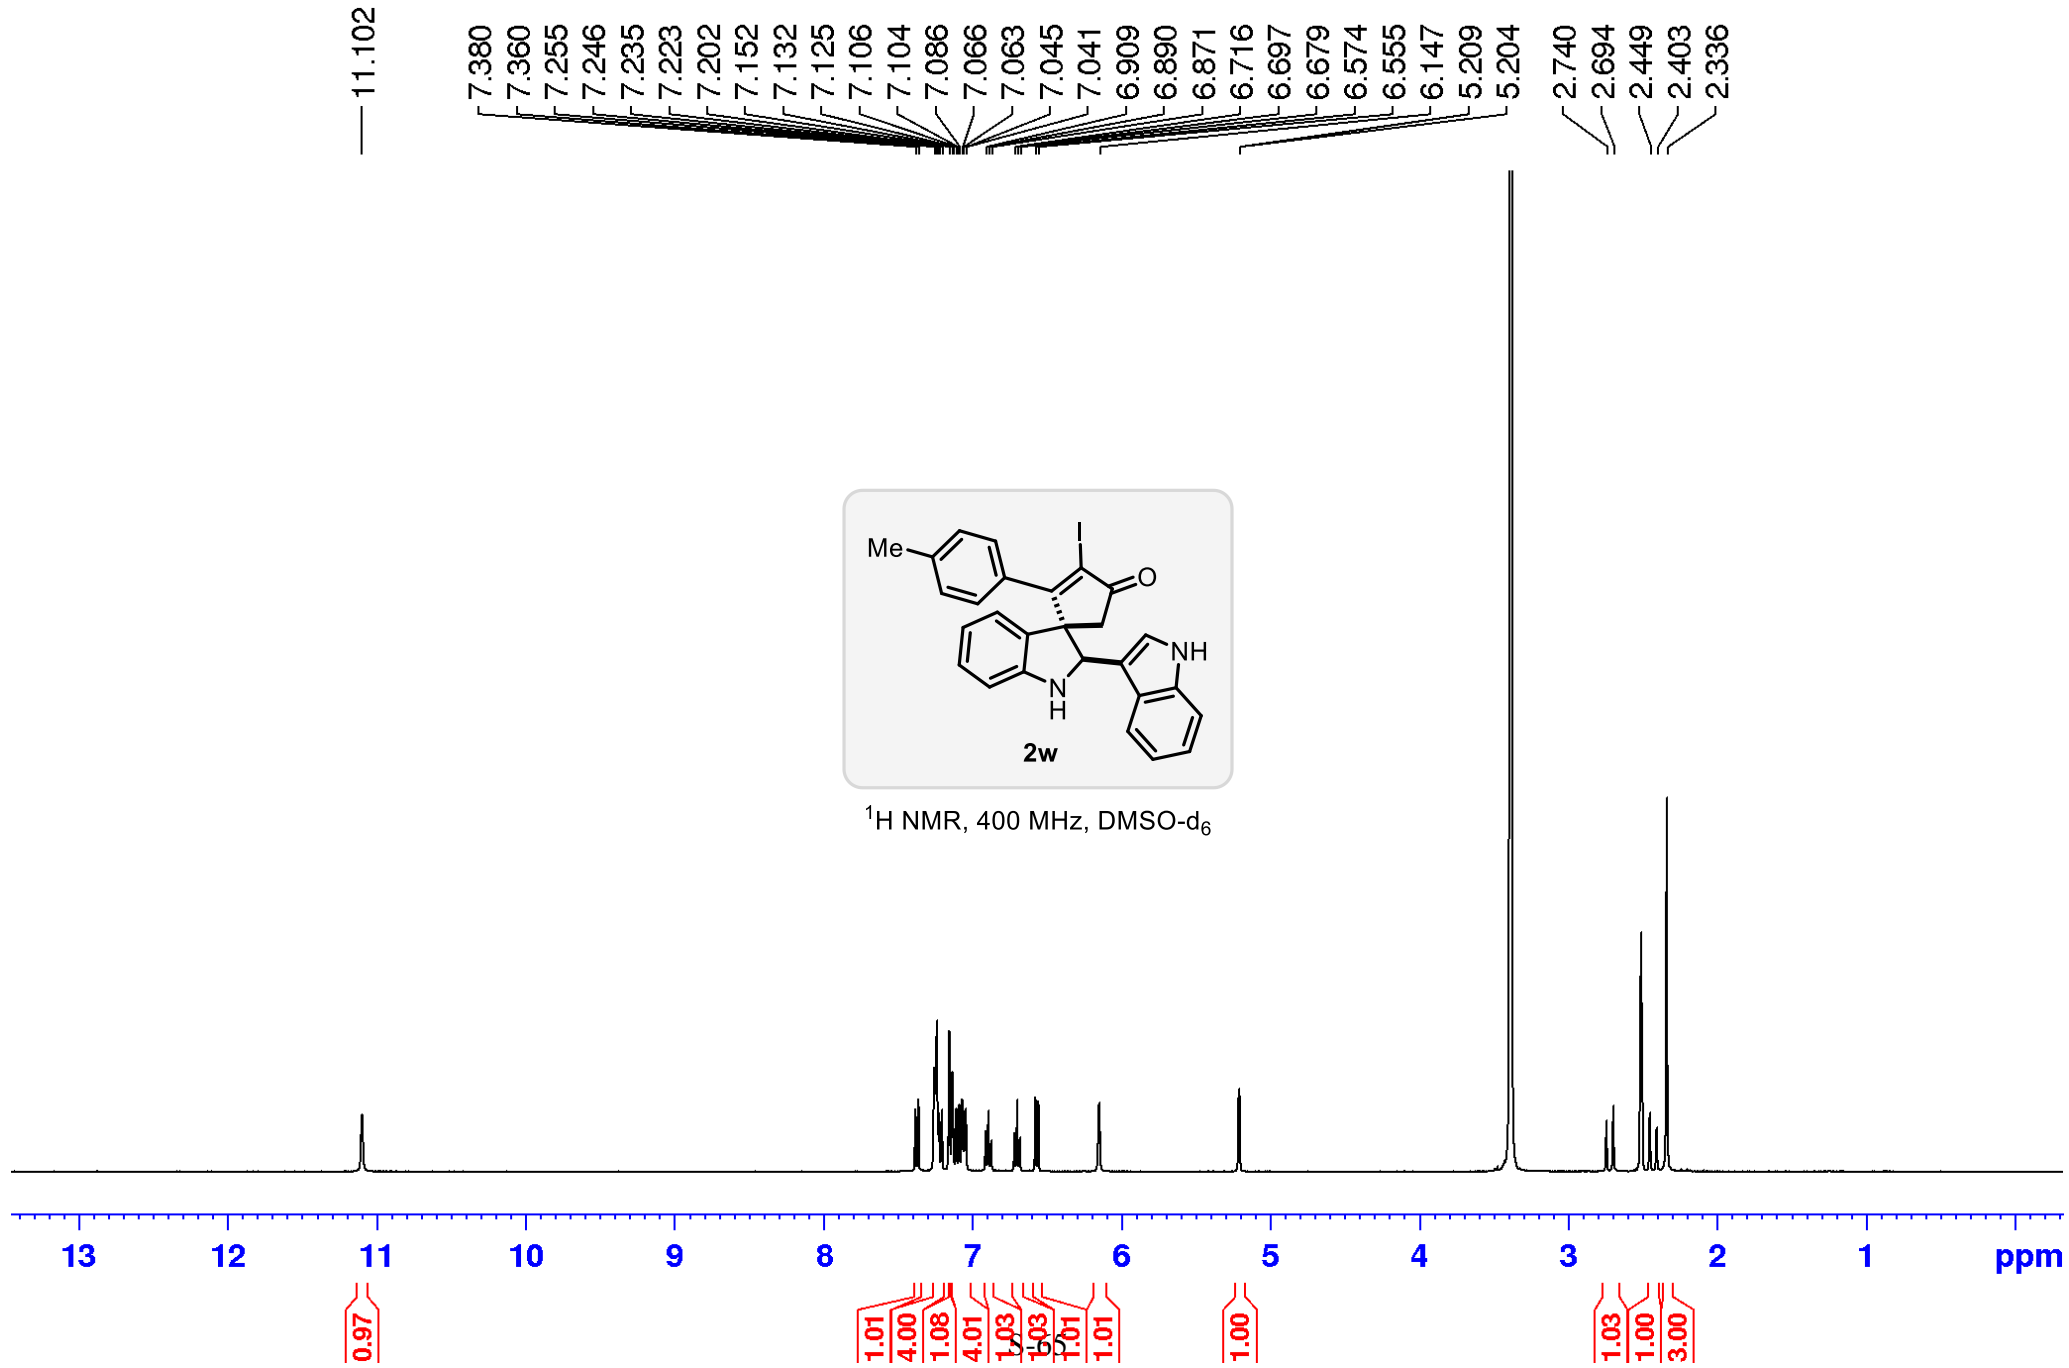

— 201.843

— 179.049

151.306  
139.144  
136.741  
132.910  
130.398  
128.978  
128.925  
128.170  
125.920  
124.516  
123.280  
121.332  
119.657  
118.874  
117.756  
113.077  
111.805  
108.653  
104.656

63.872  
63.090

— 45.093

— 20.947

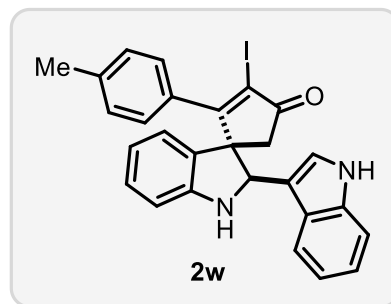

$^{13}\text{C}\{^1\text{H}\}$  NMR, 100 MHz, DMSO- $d_6$

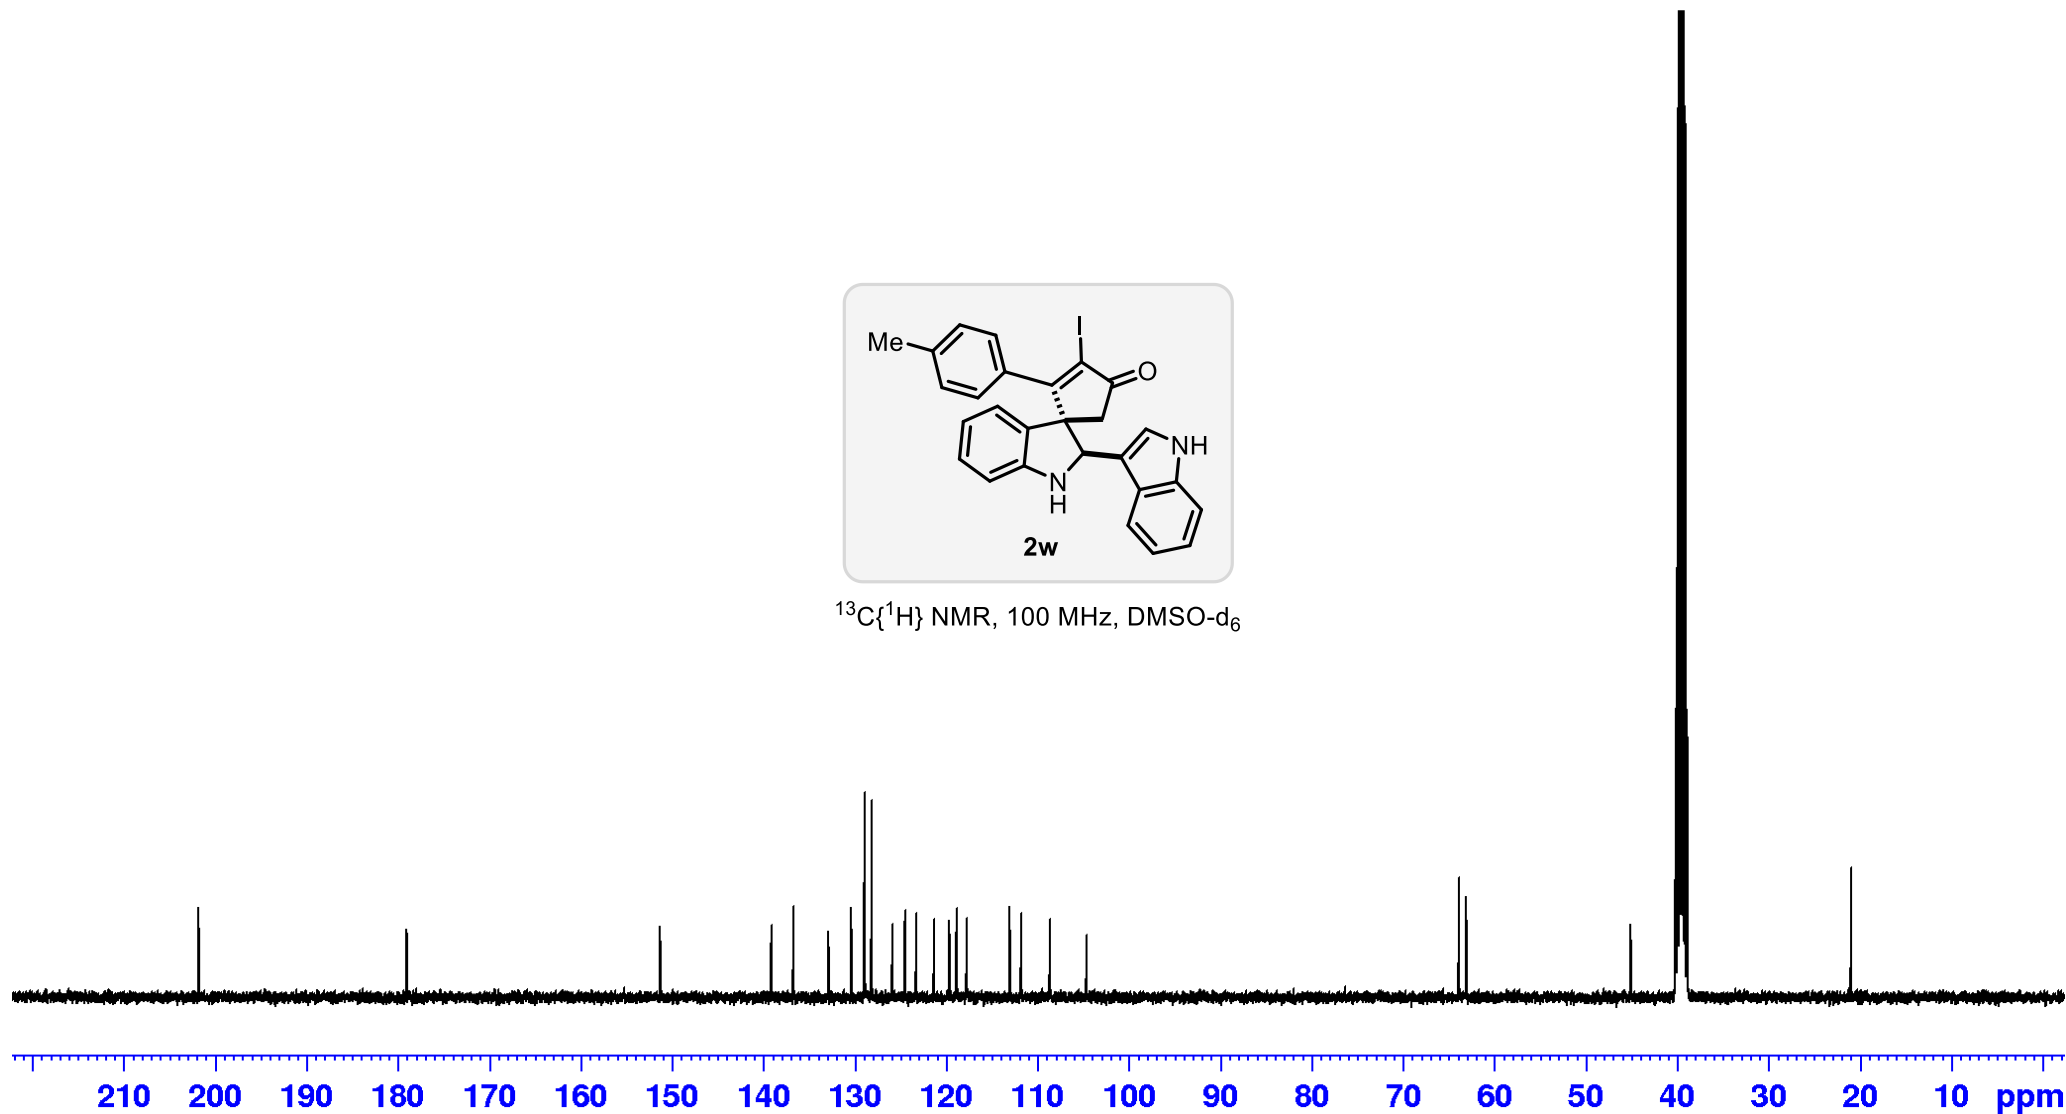

S-66

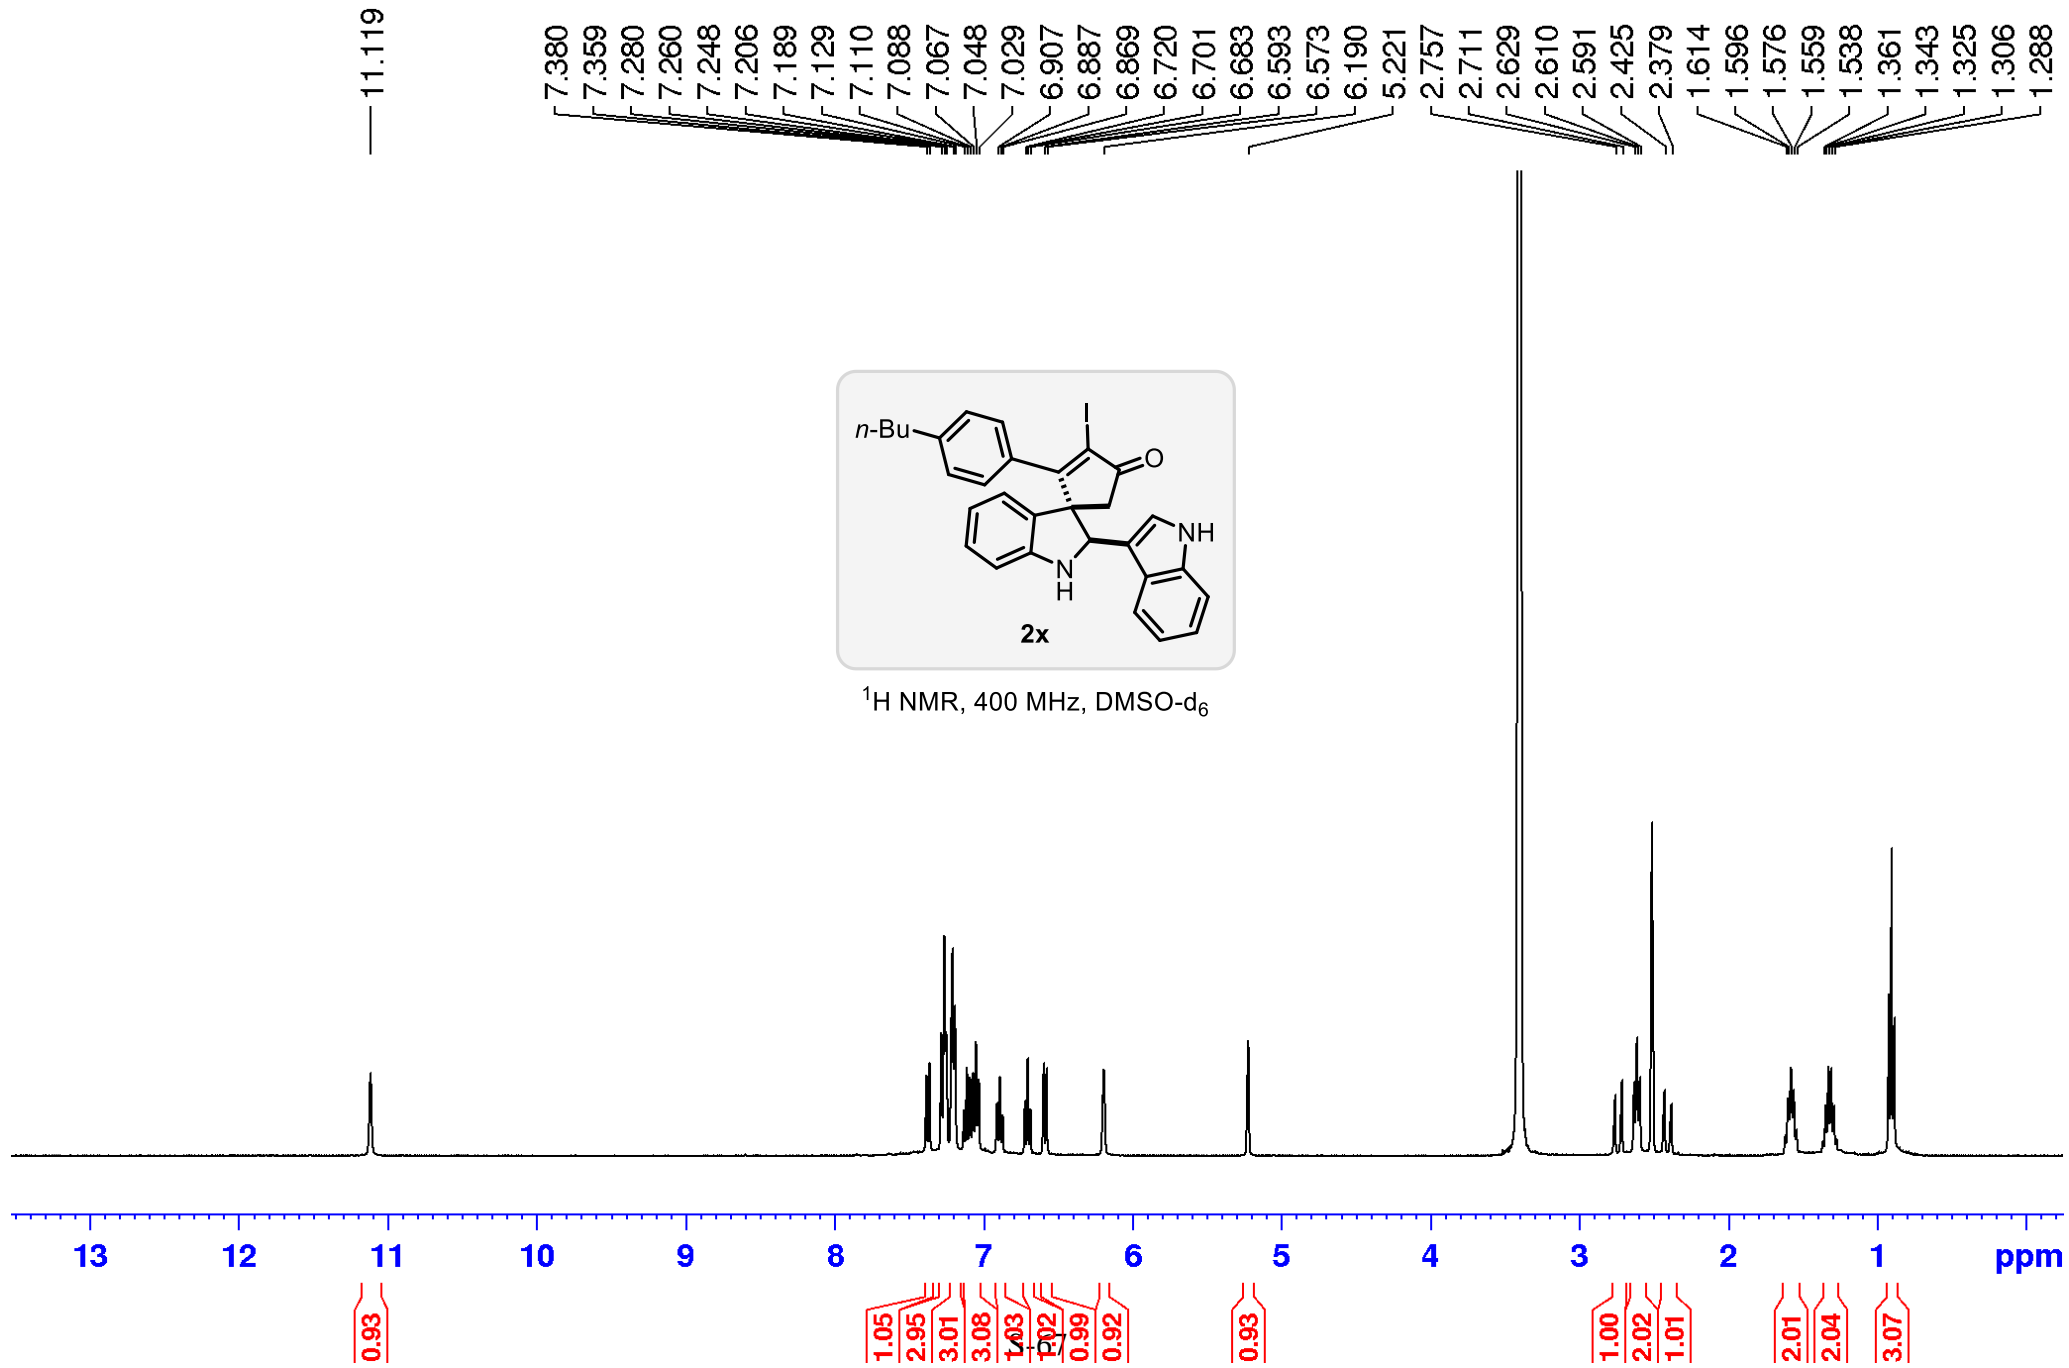

— 201.881

— 178.689

151.230  
144.032  
136.722  
133.074  
130.736  
128.985  
128.378  
128.250  
126.001  
124.547  
123.230  
121.363  
119.632  
118.875  
117.886  
112.859  
111.841  
108.797  
104.758

63.964  
63.130

— 45.240

34.674  
32.797

— 21.933

— 13.858

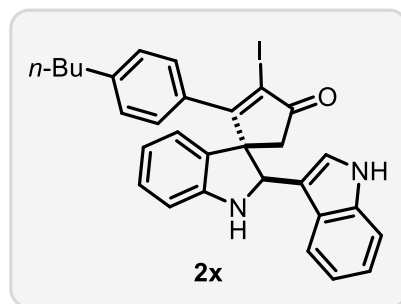

$^{13}\text{C}\{^1\text{H}\}$  NMR, 100 MHz, DMSO- $\text{d}_6$

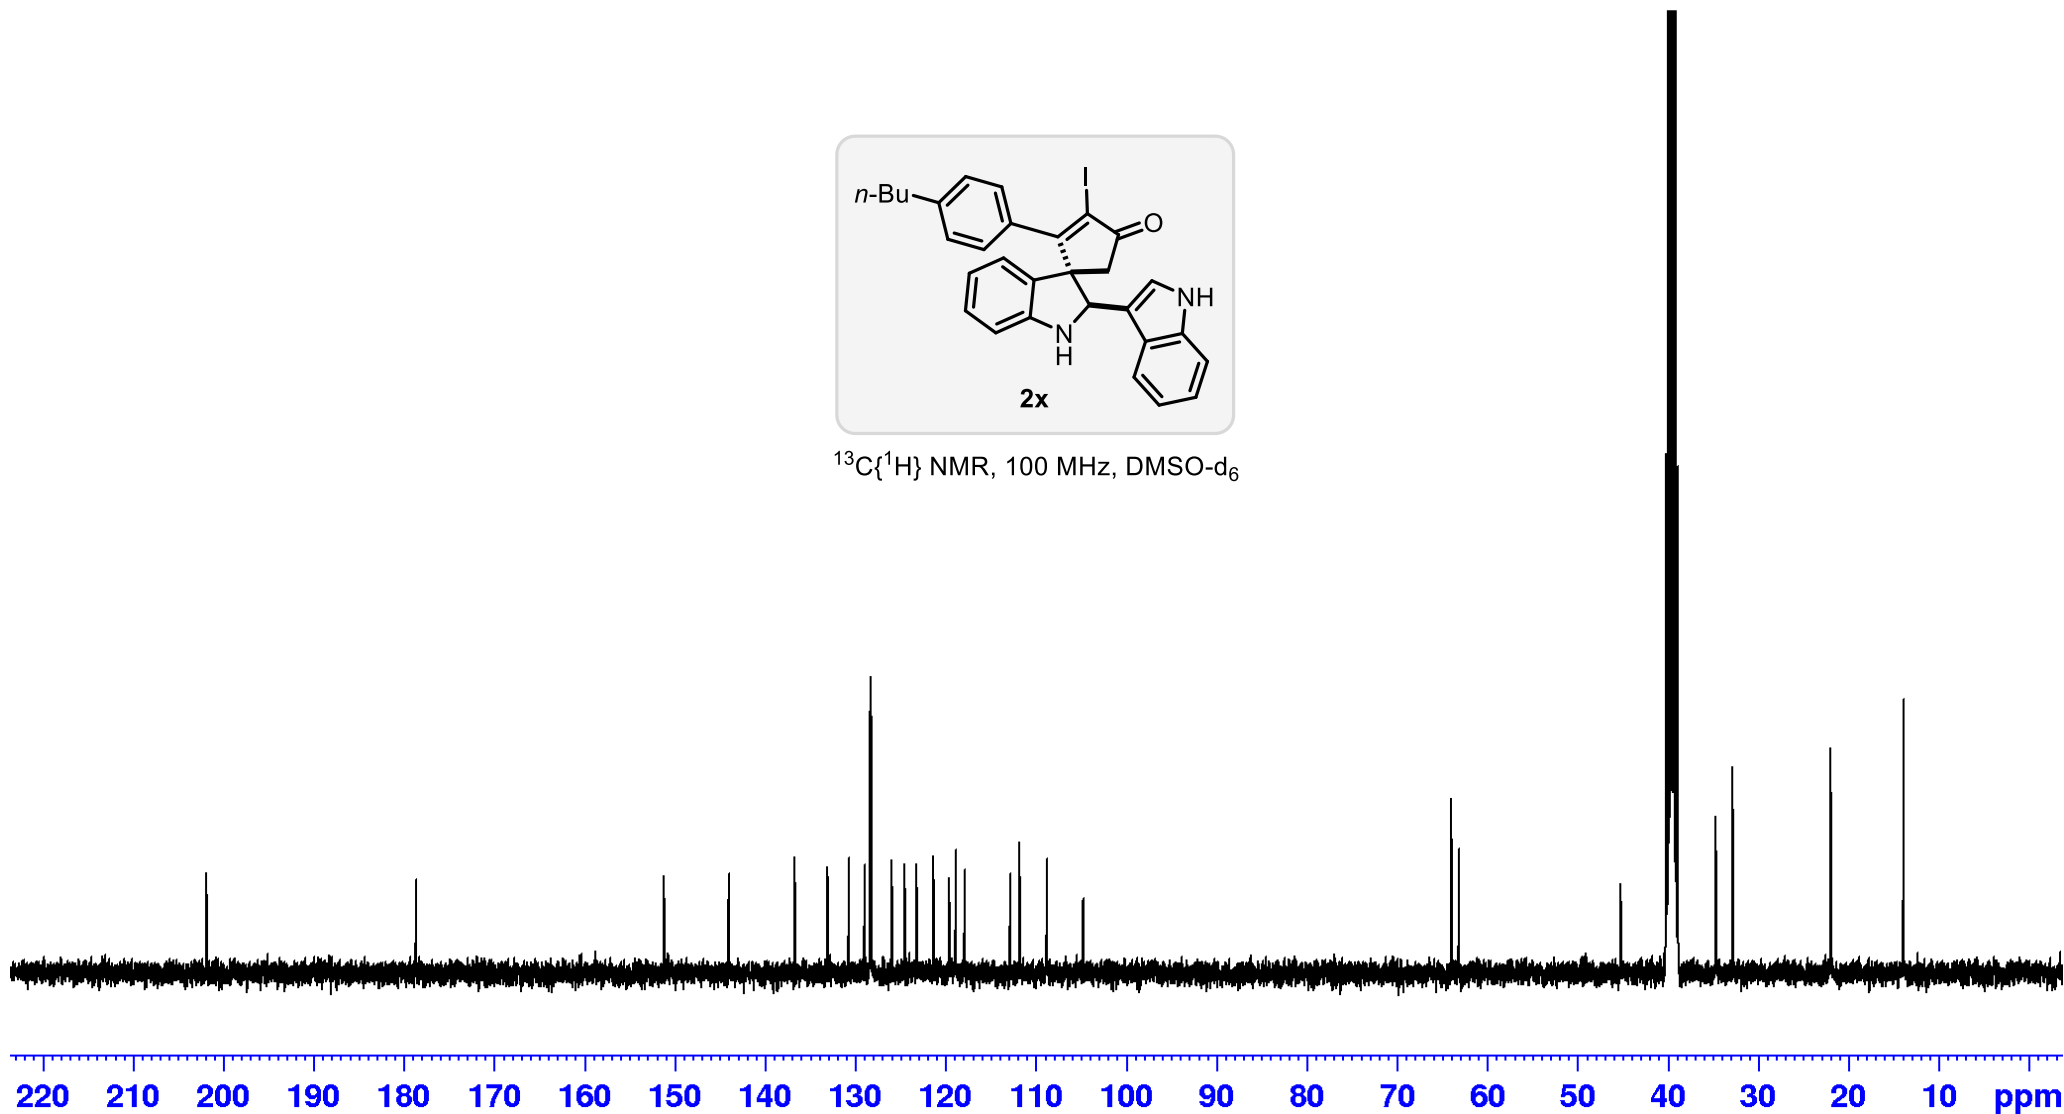

S-68

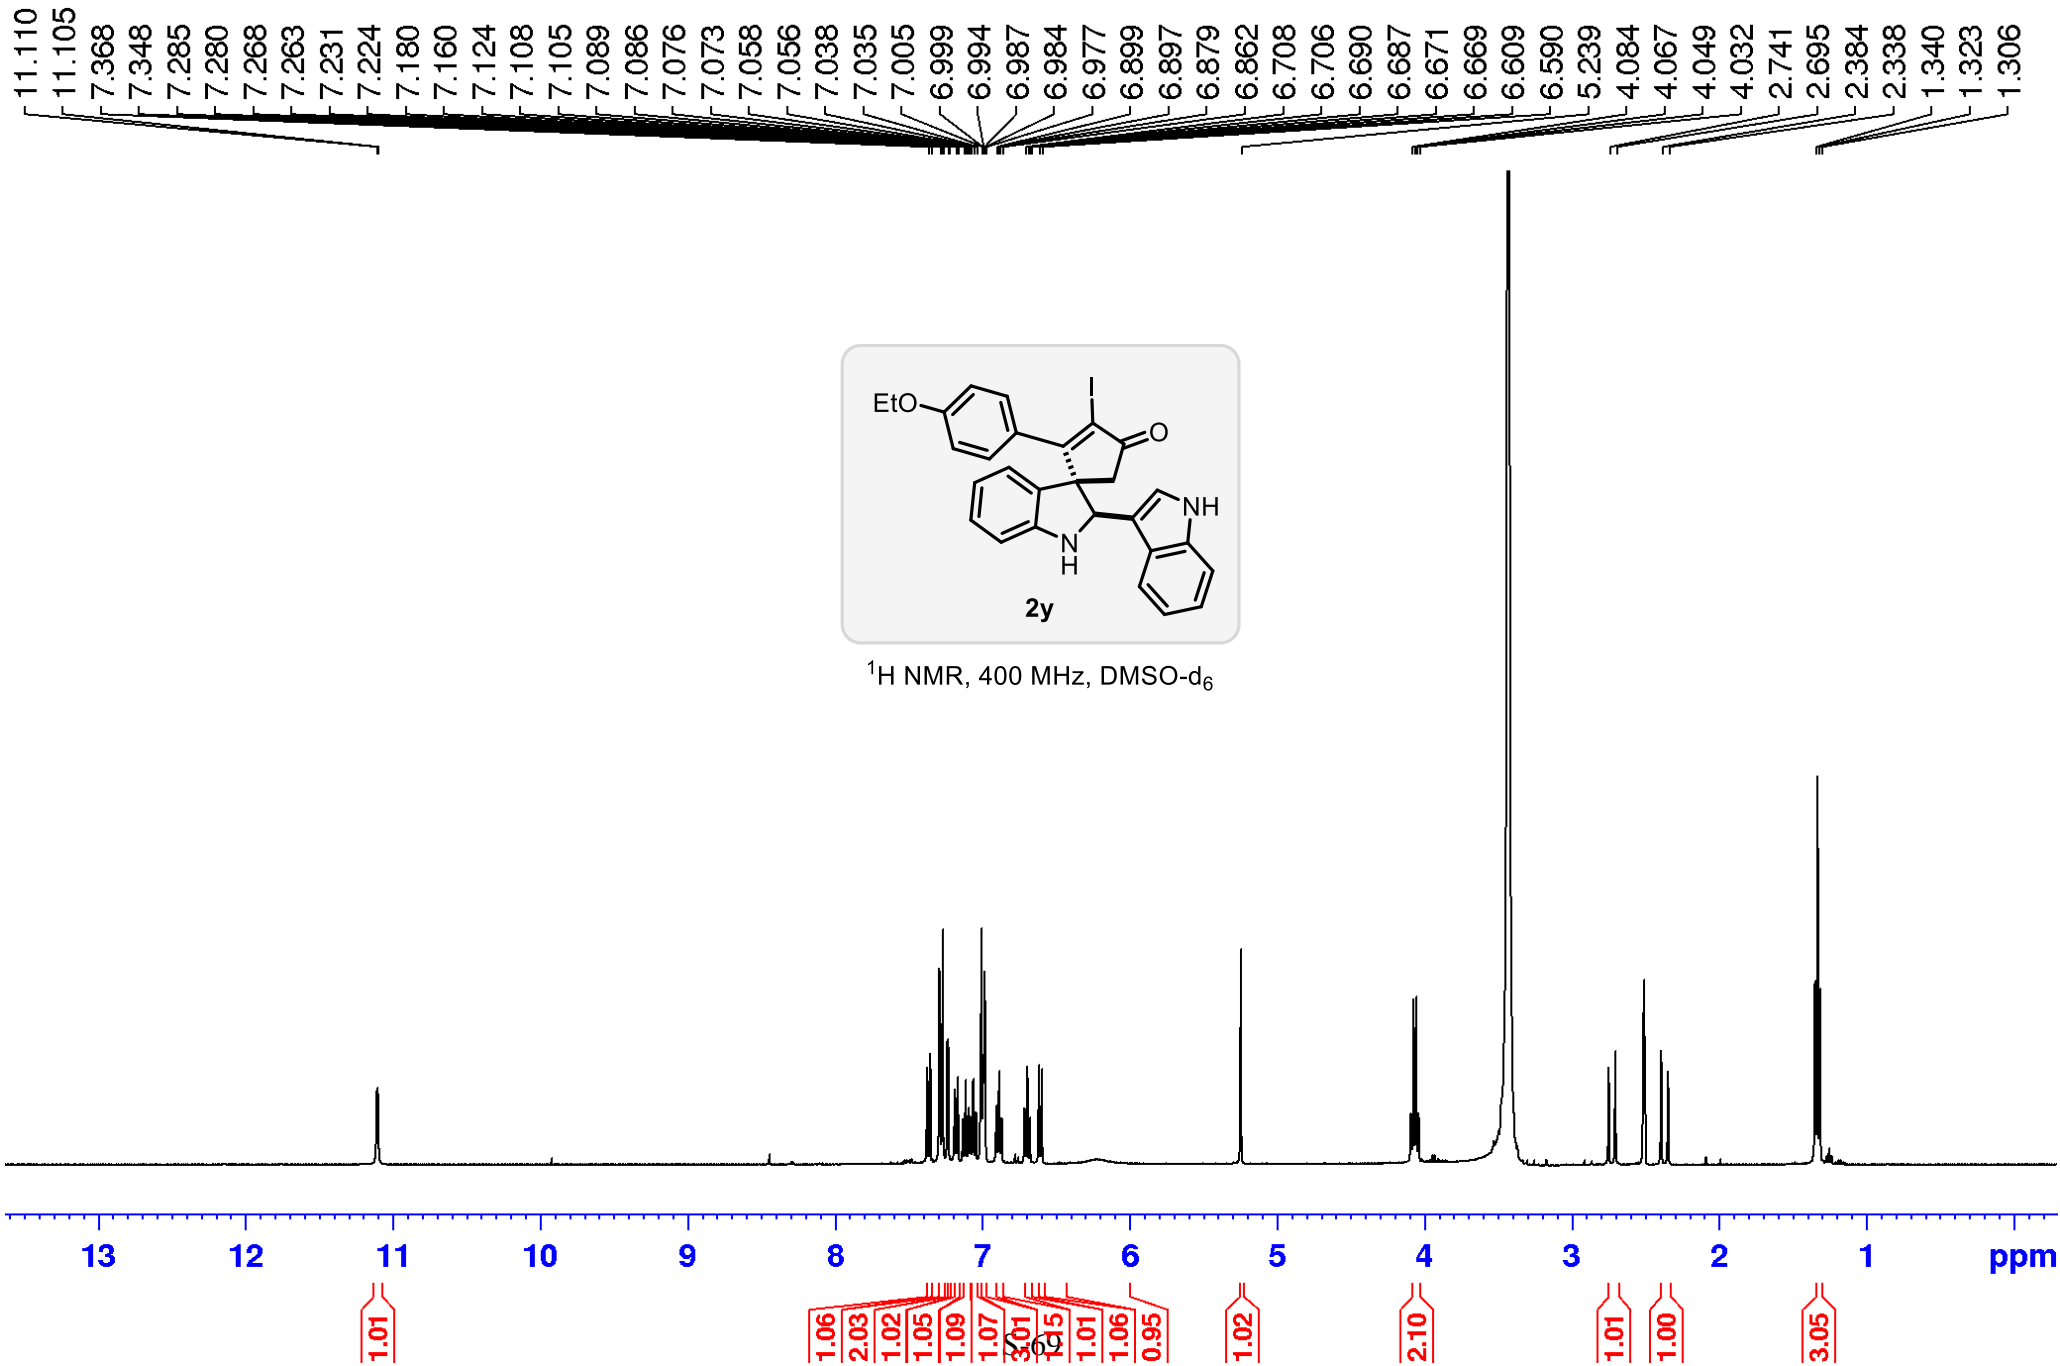

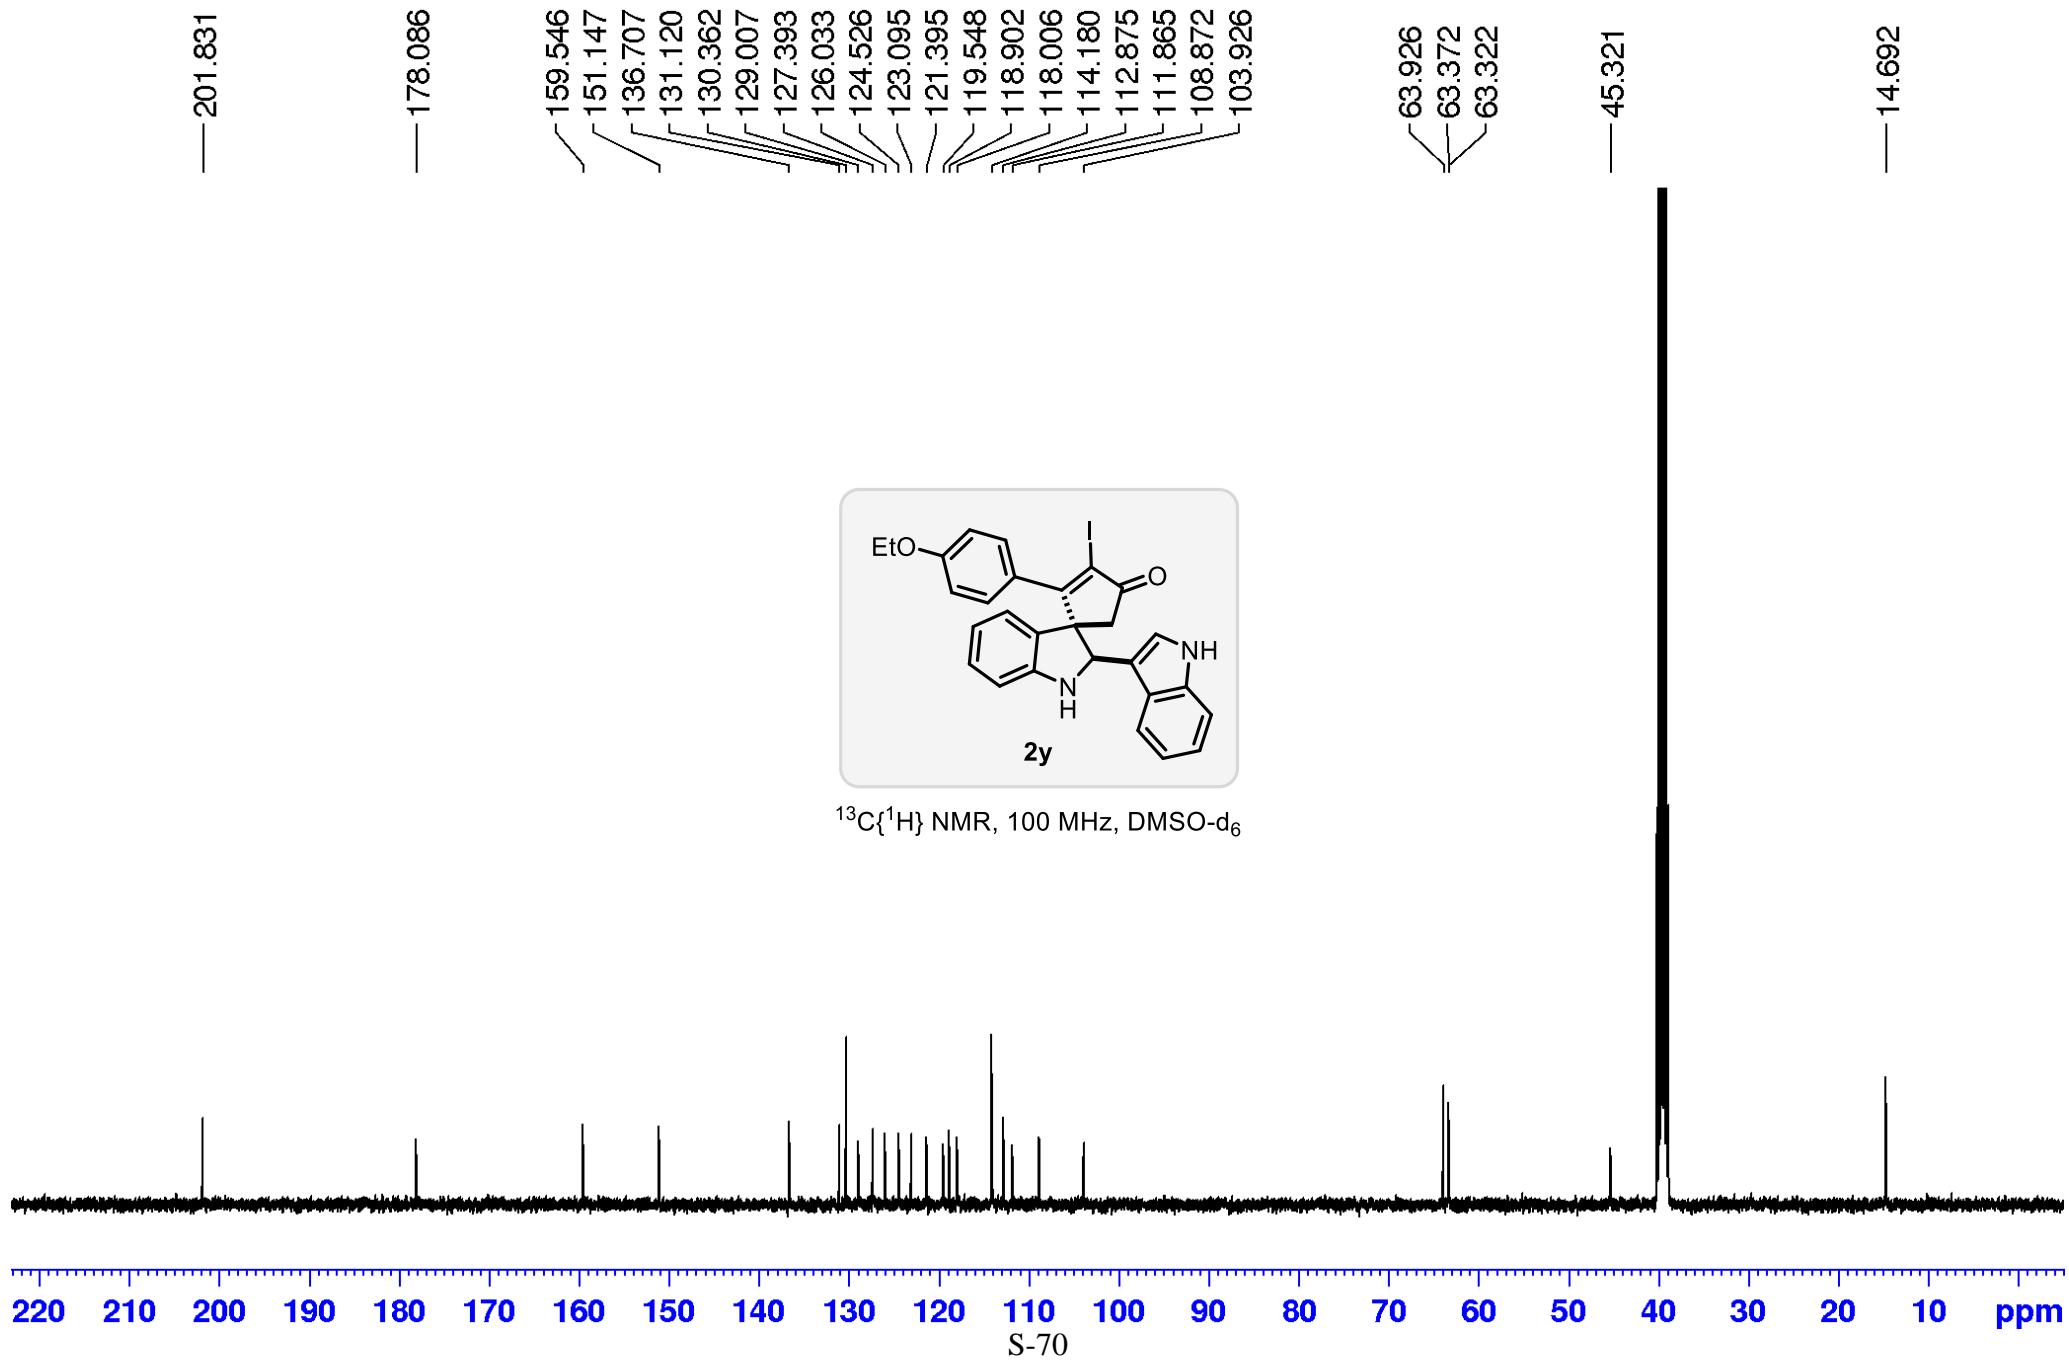

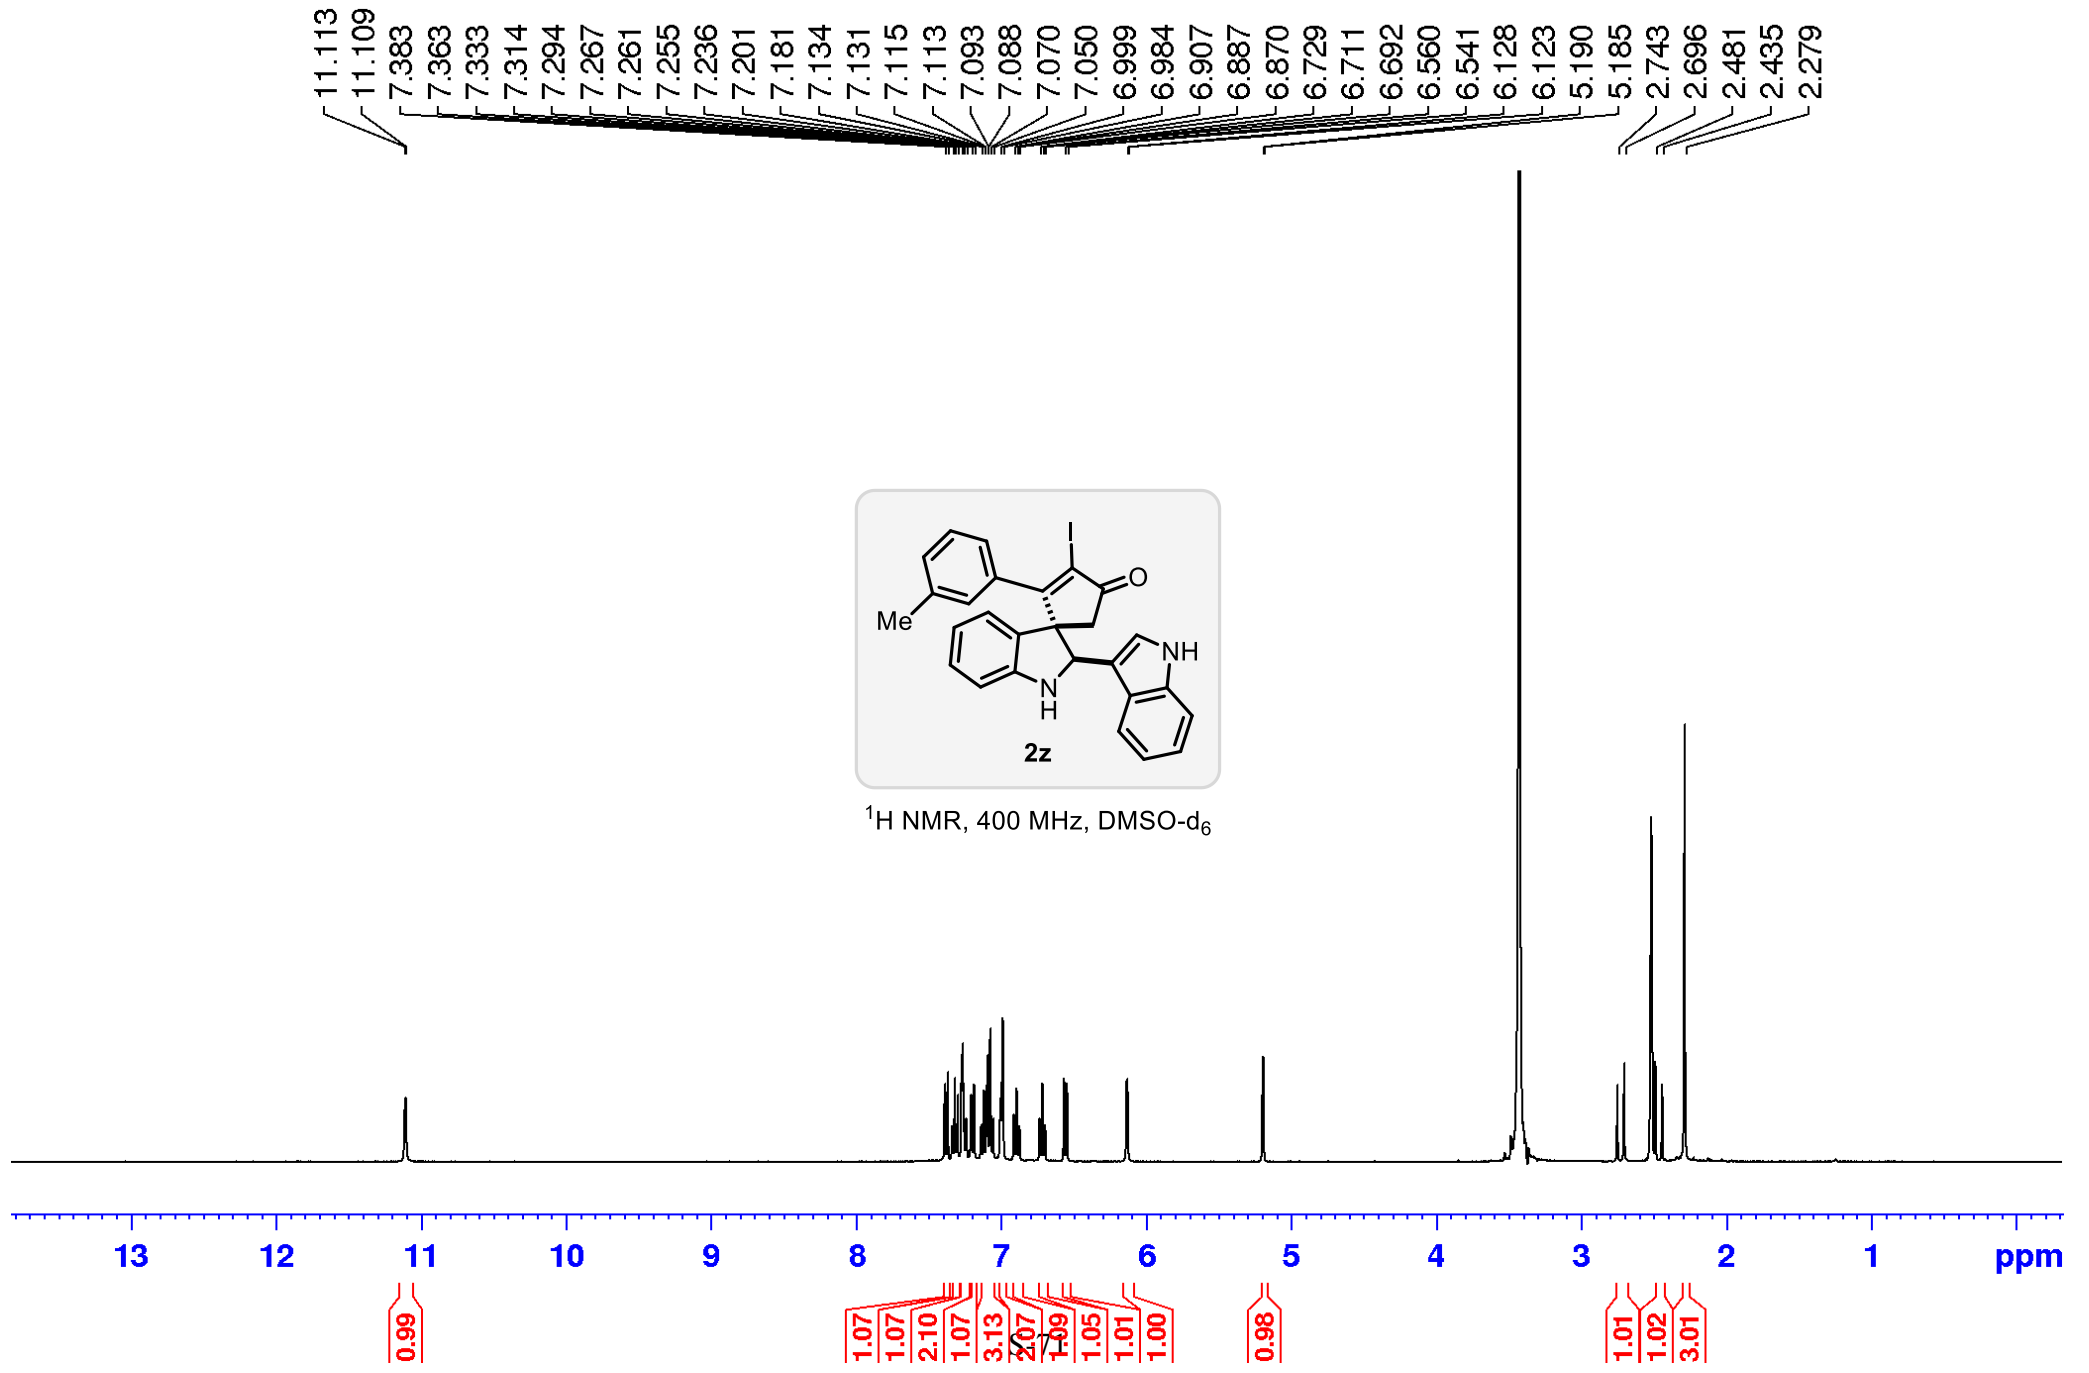

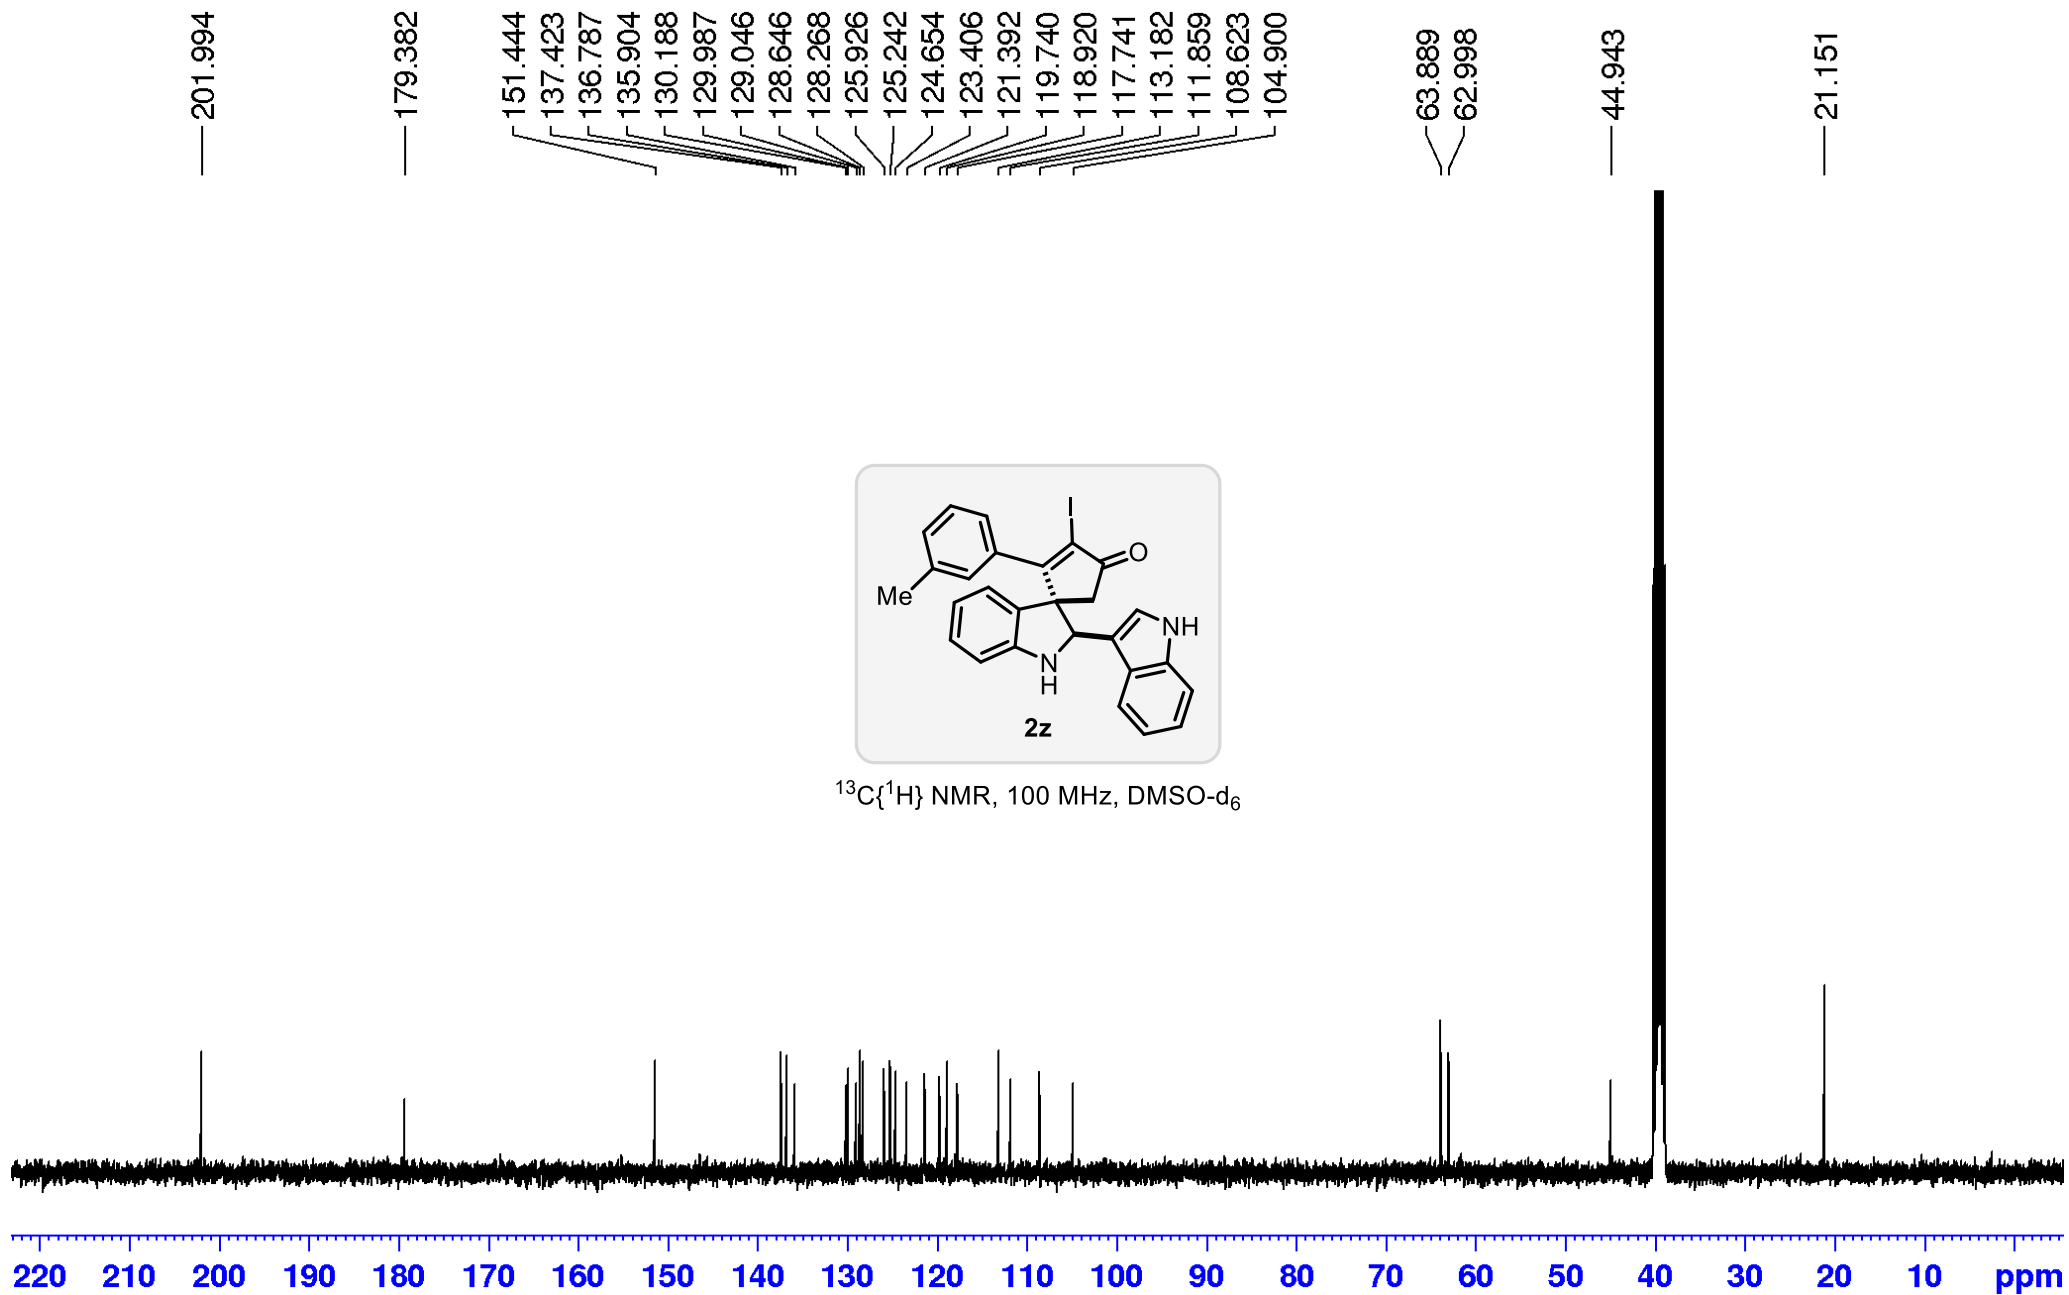



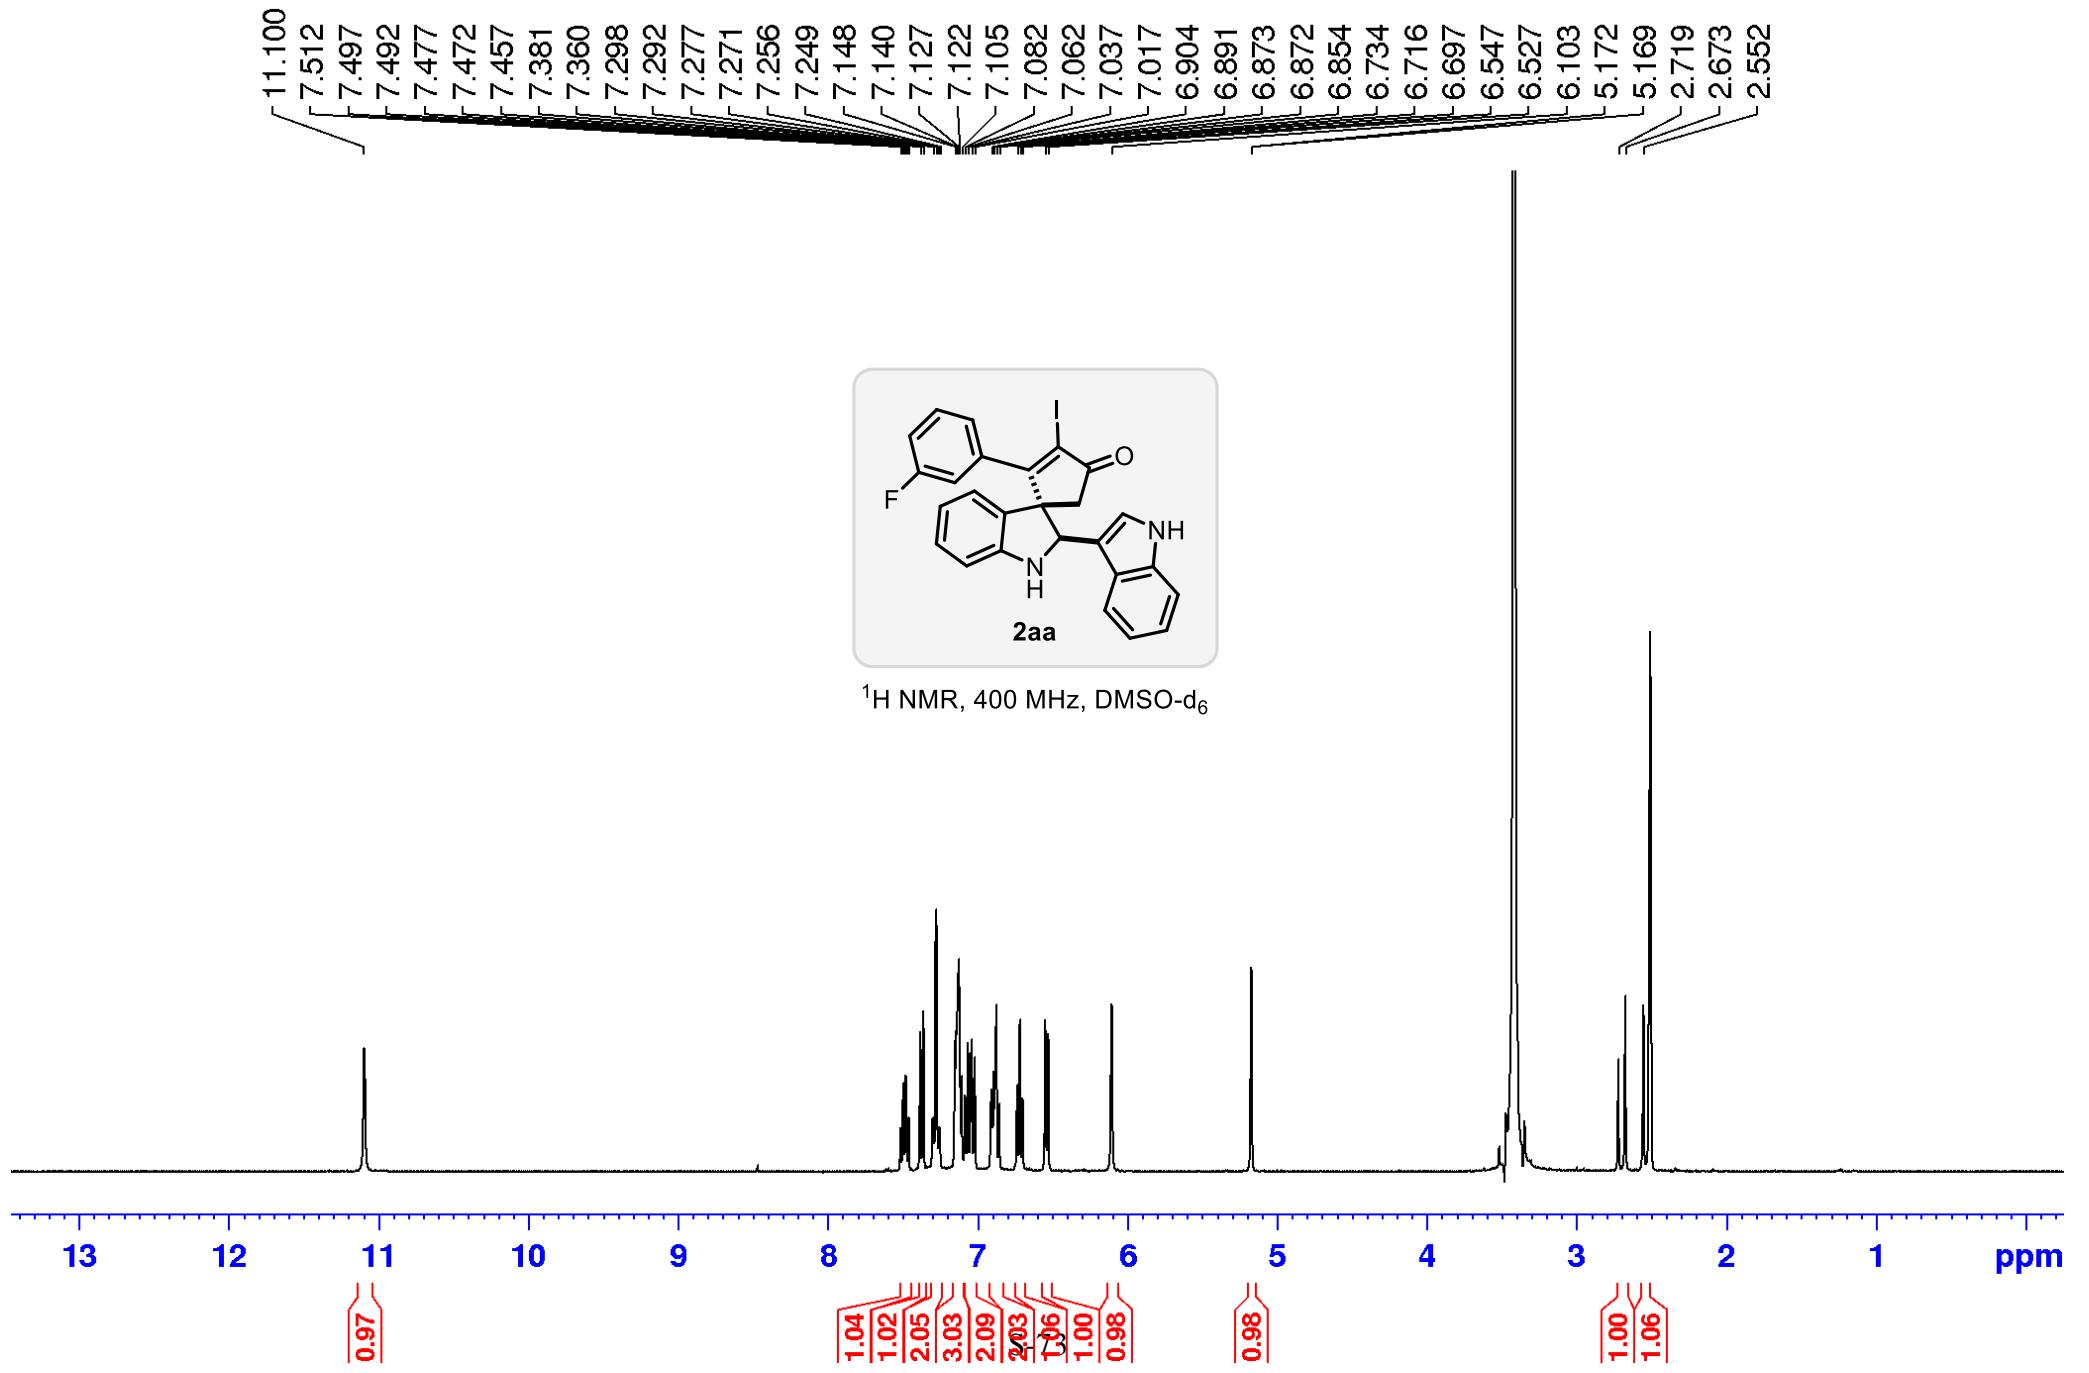

— 201.895

178.045  
162.793  
160.368  
151.630  
138.153  
138.075  
136.853  
130.590  
130.508  
129.398  
129.295  
125.737  
124.795  
124.380  
123.457  
121.395  
119.770  
118.970  
117.728  
116.186  
115.981  
114.898  
114.669  
113.524  
111.849  
108.577  
105.553

63.697  
63.037

— 44.557

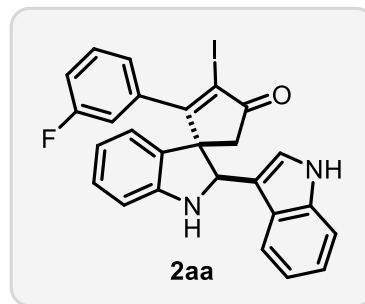

$^{13}\text{C}\{^1\text{H}\}$  NMR, 100 MHz, DMSO- $\text{d}_6$

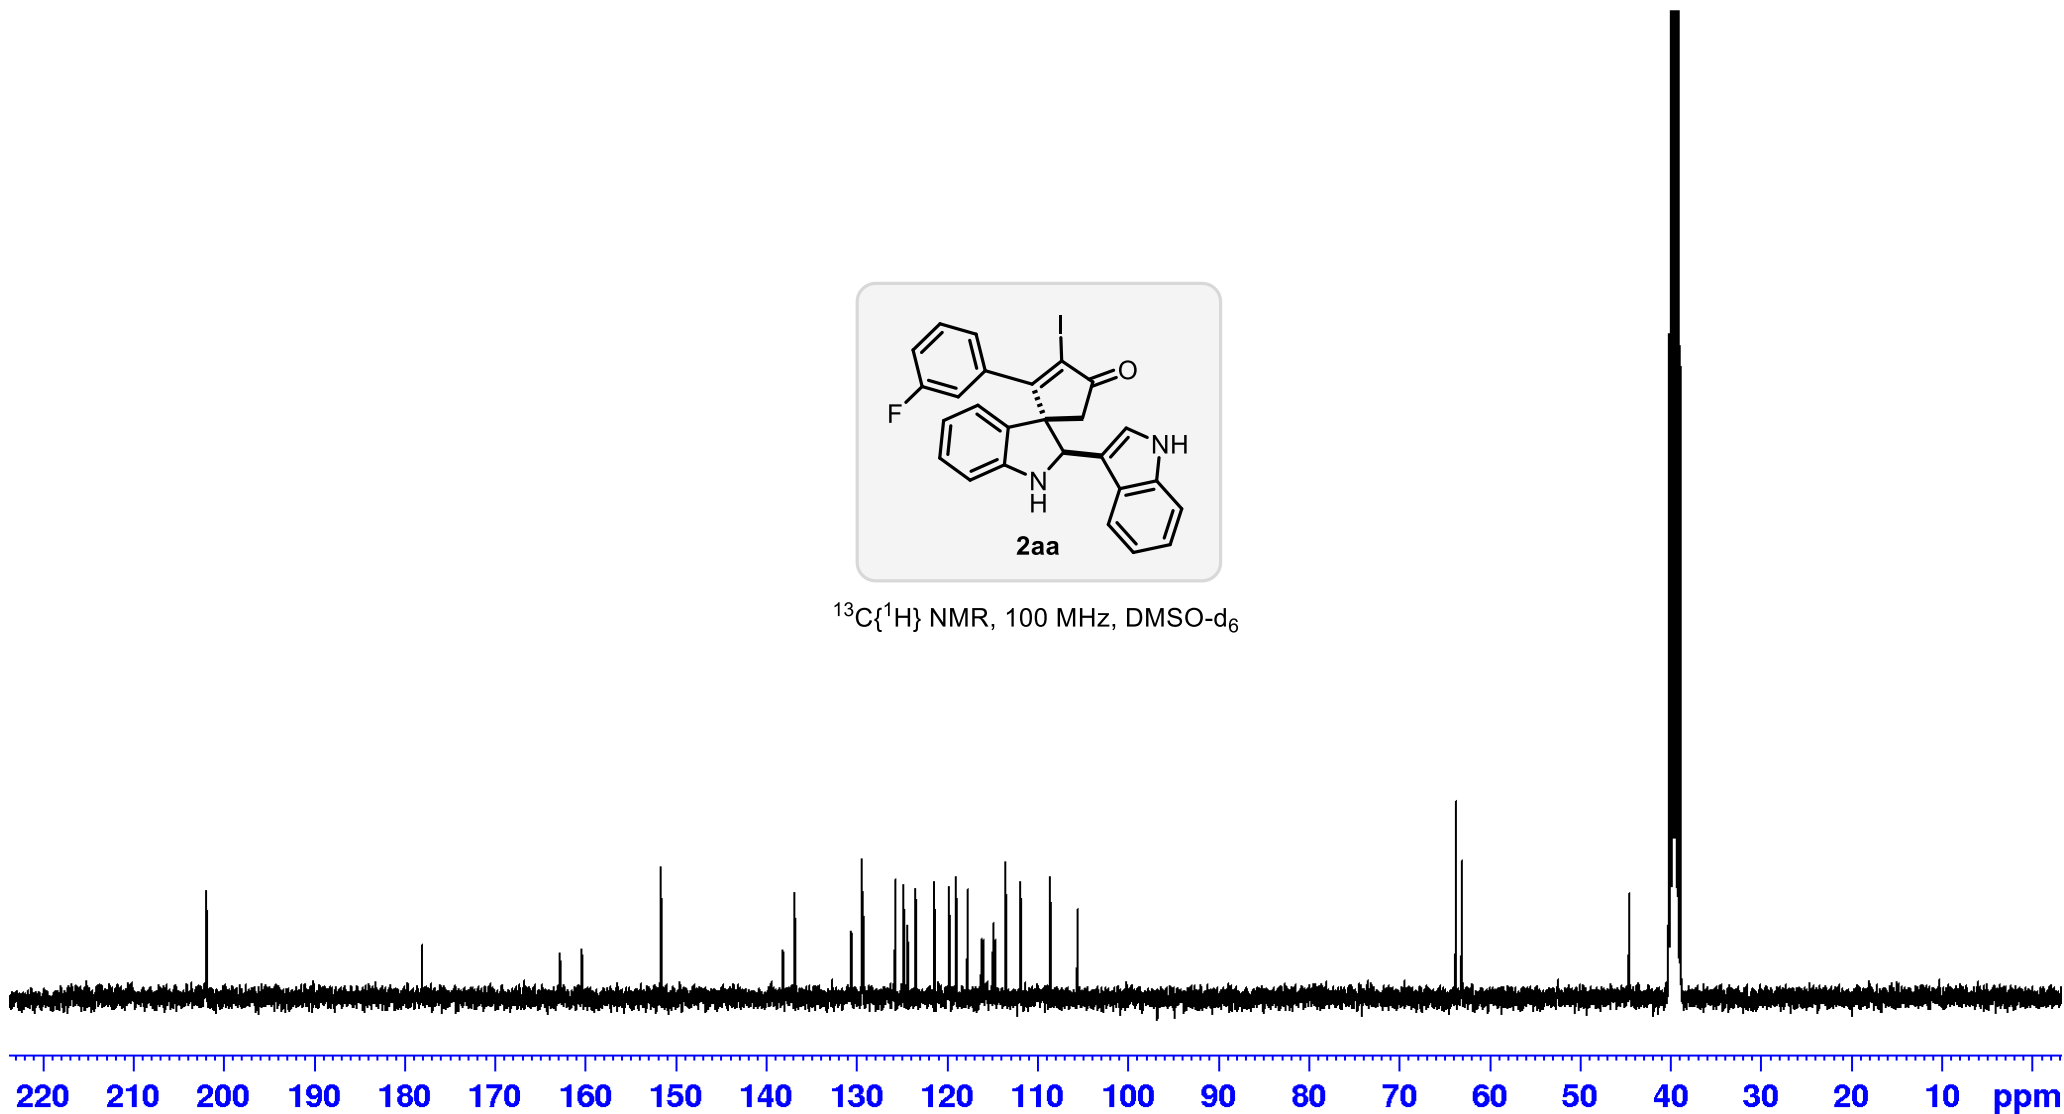

S-74

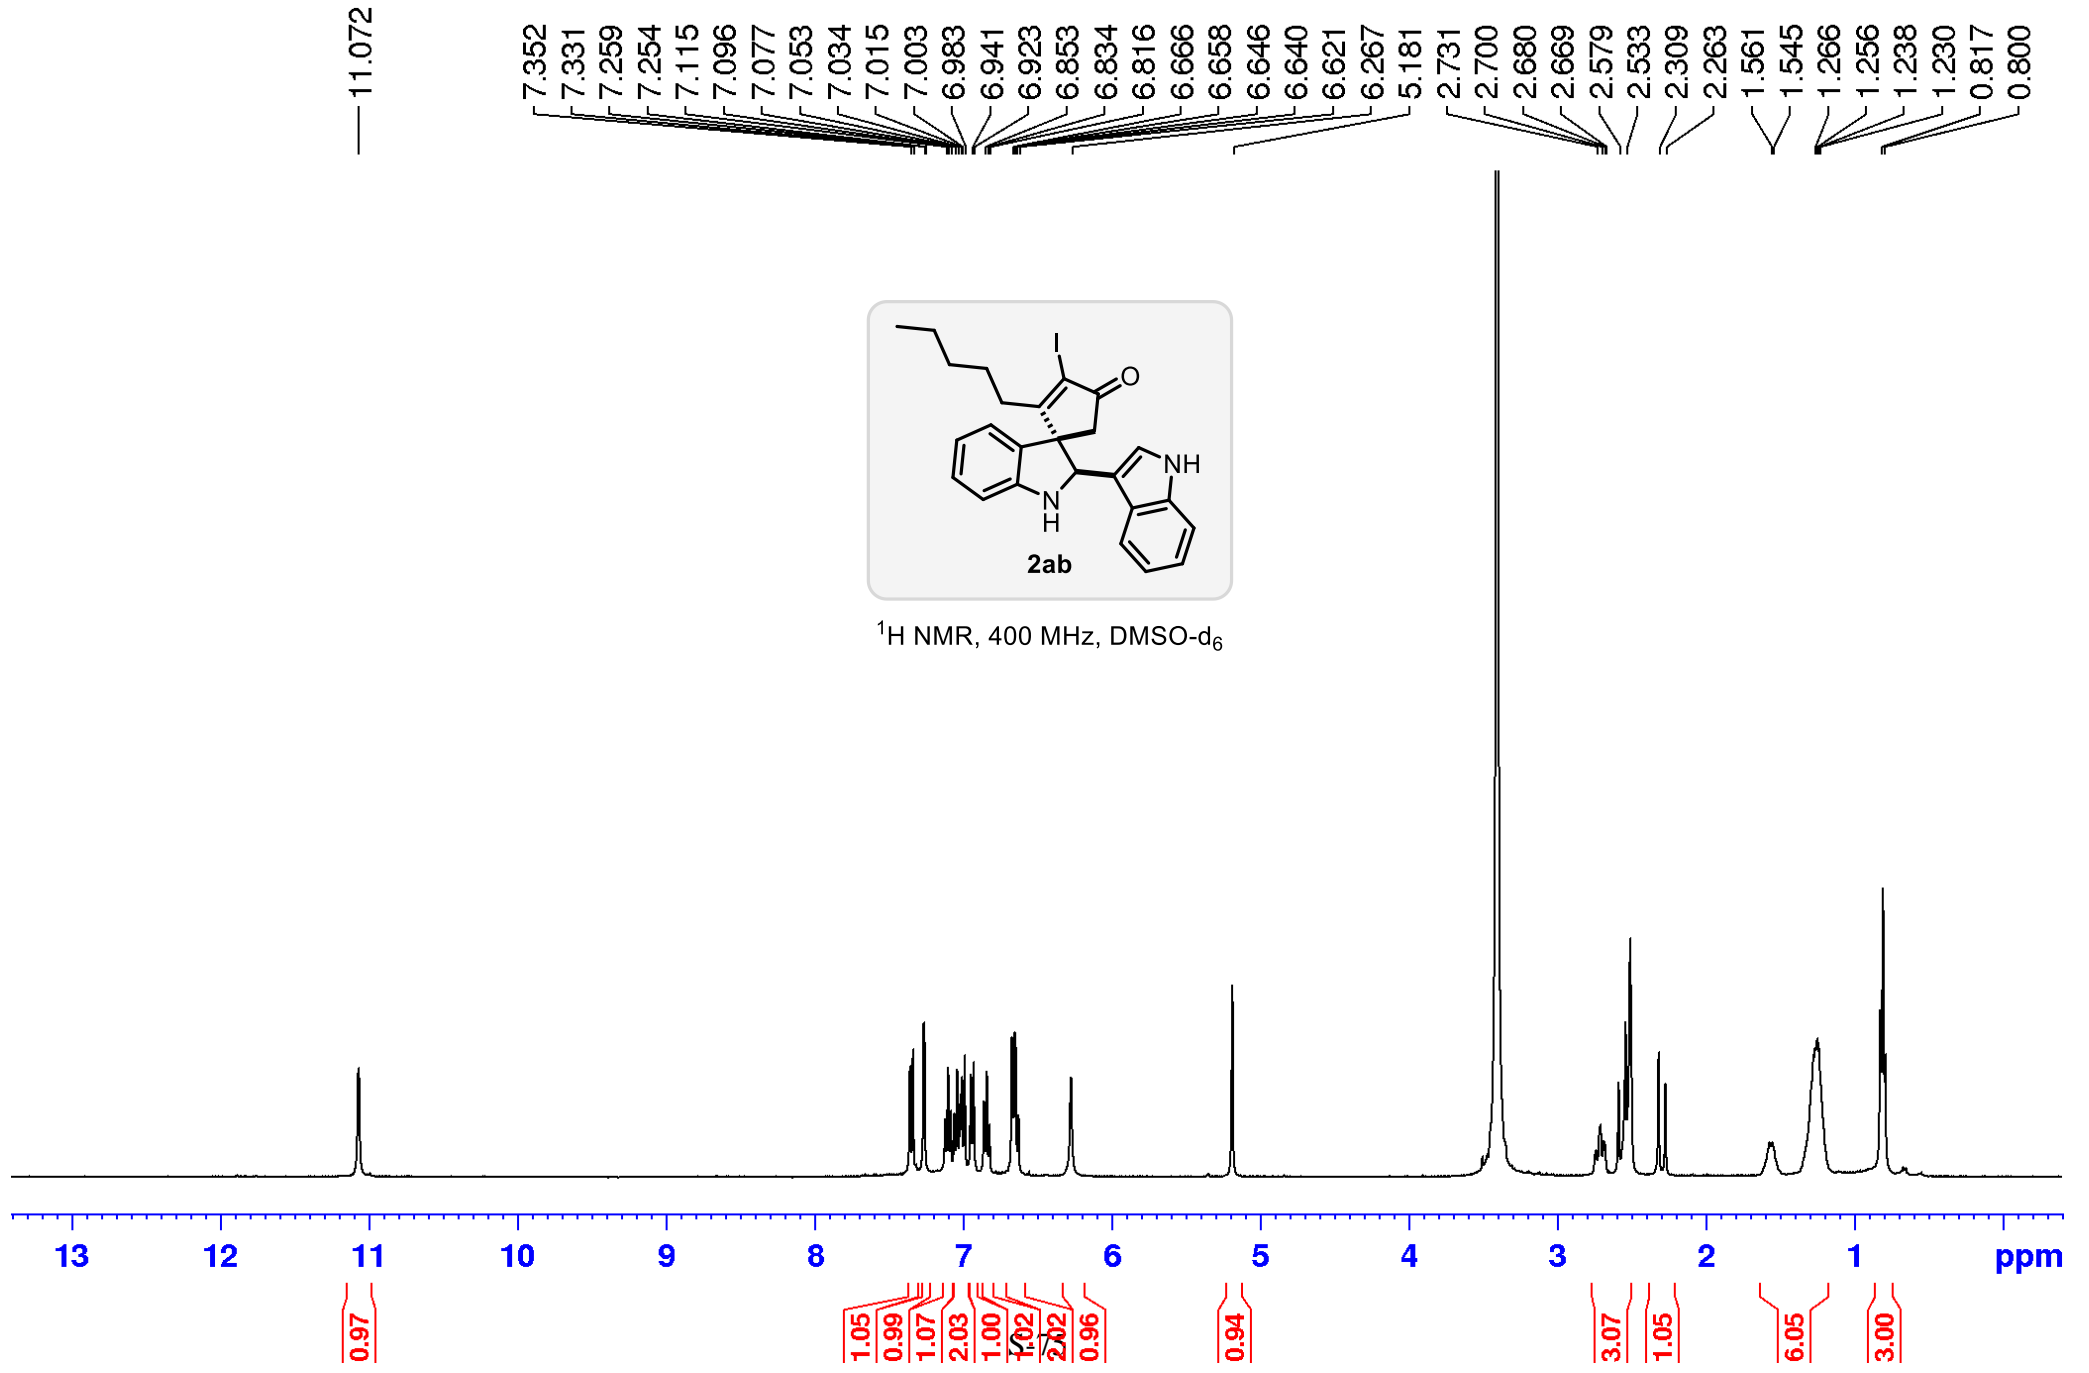

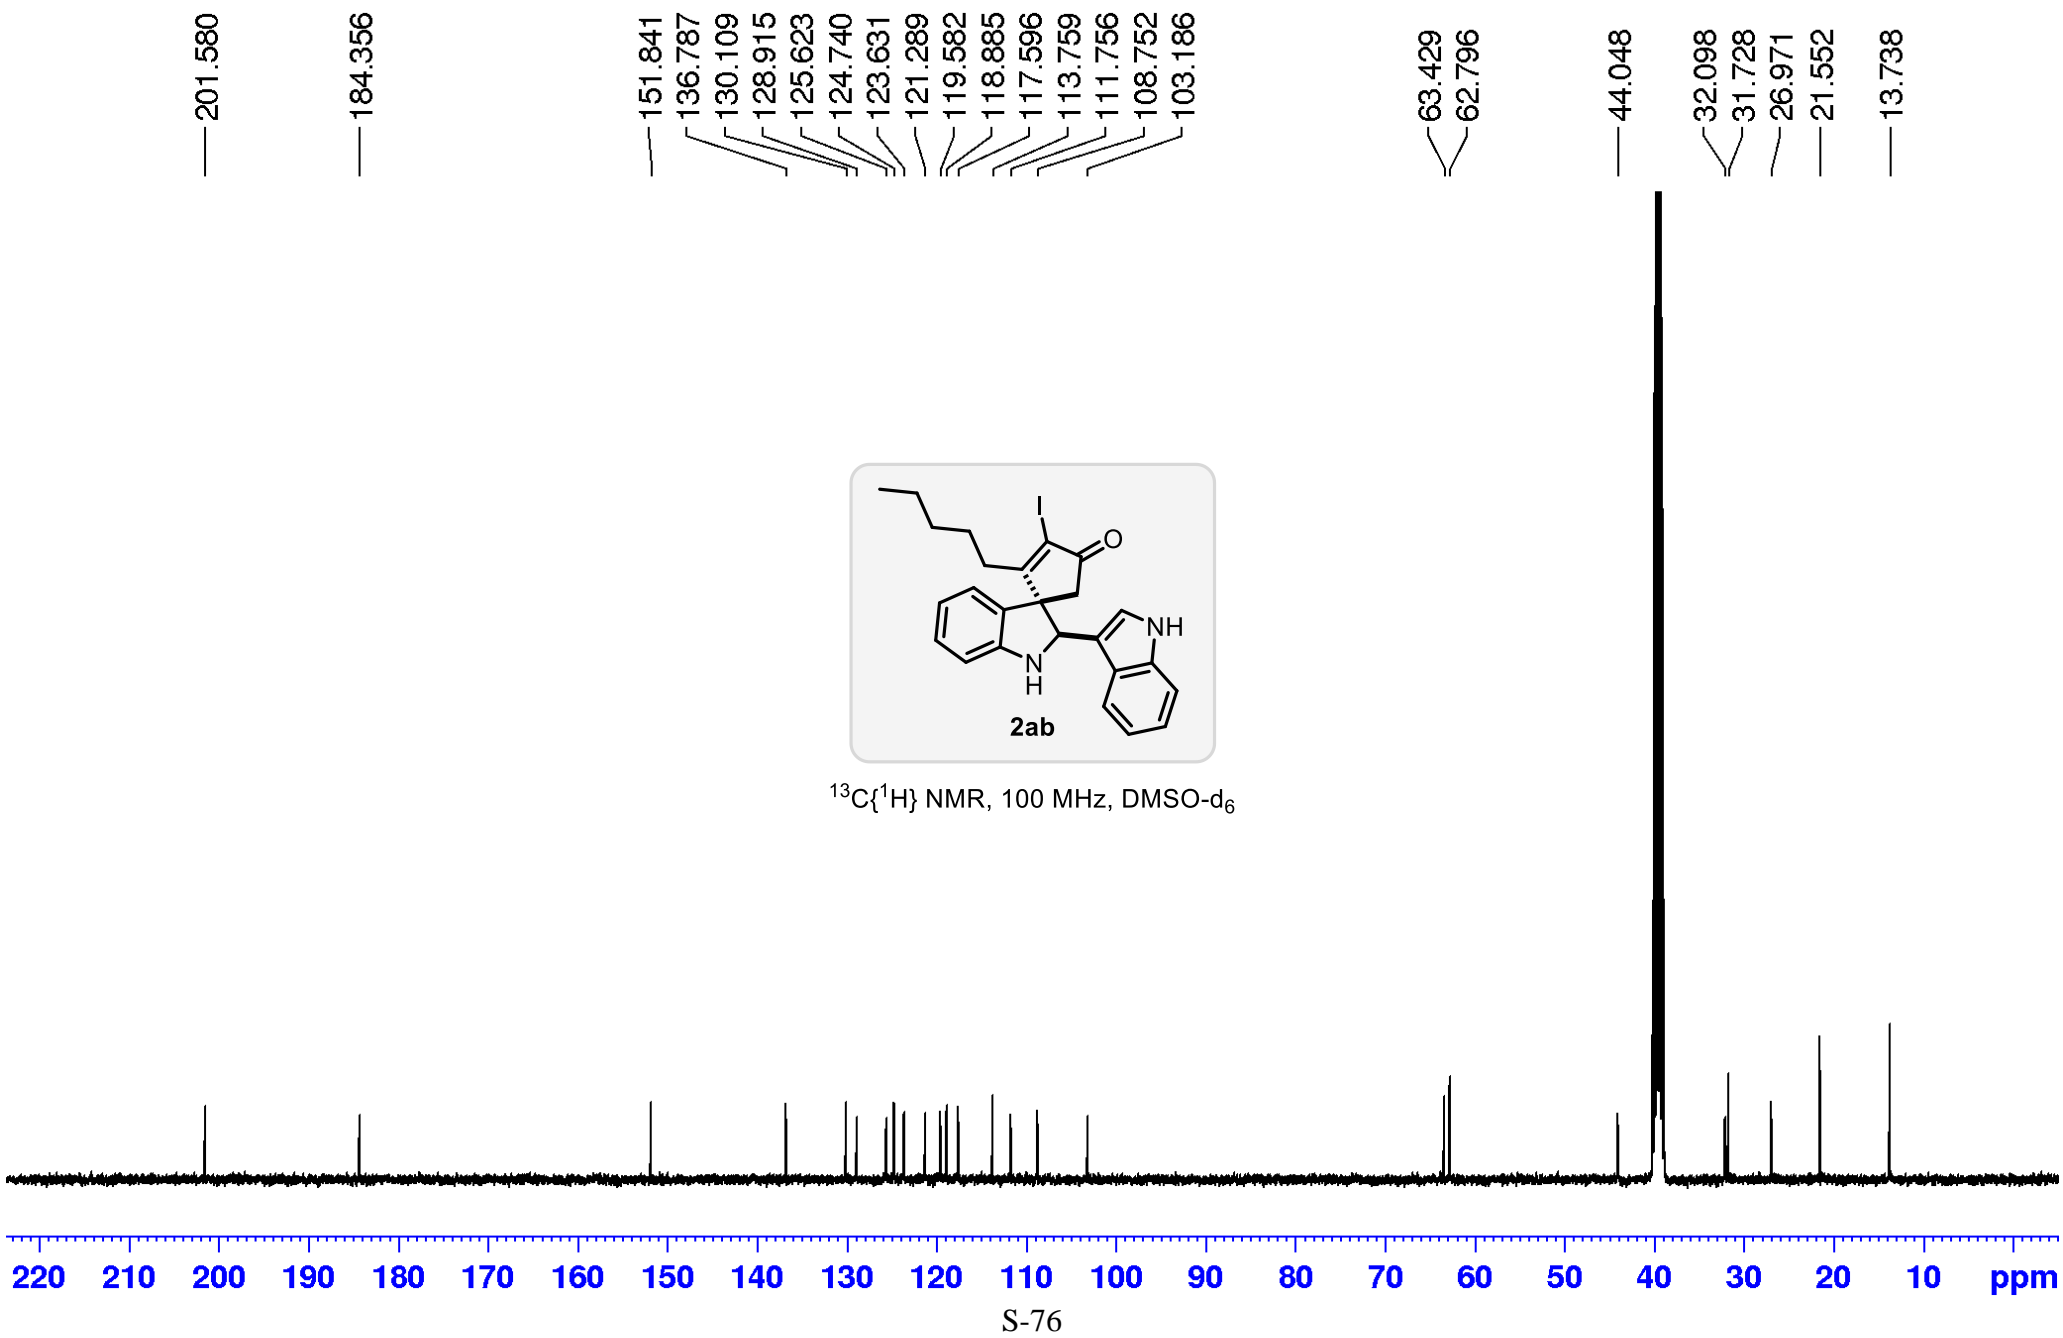

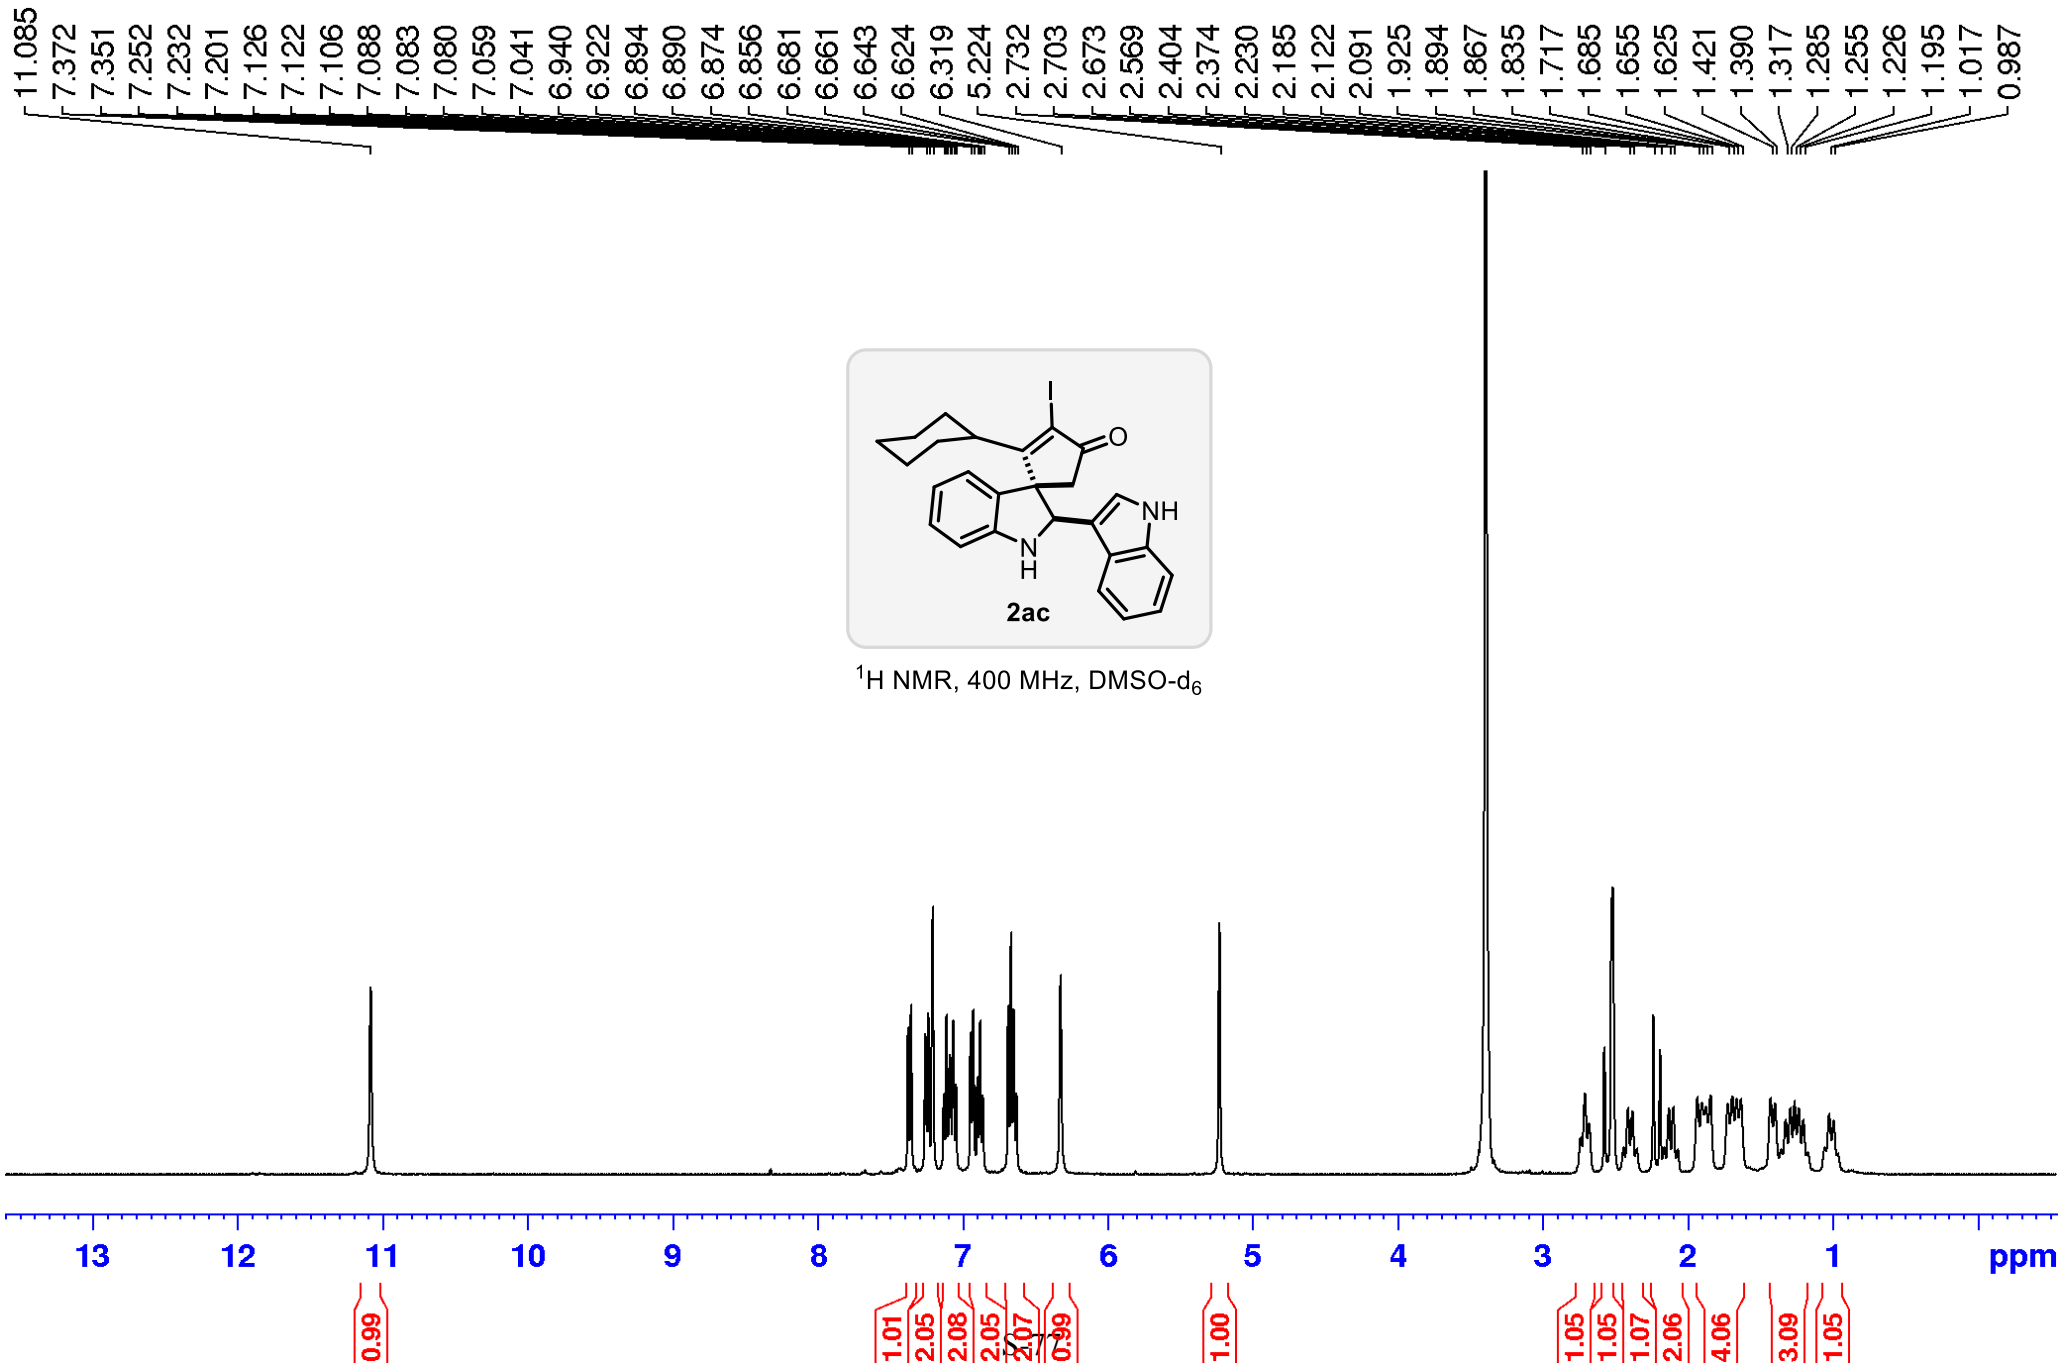

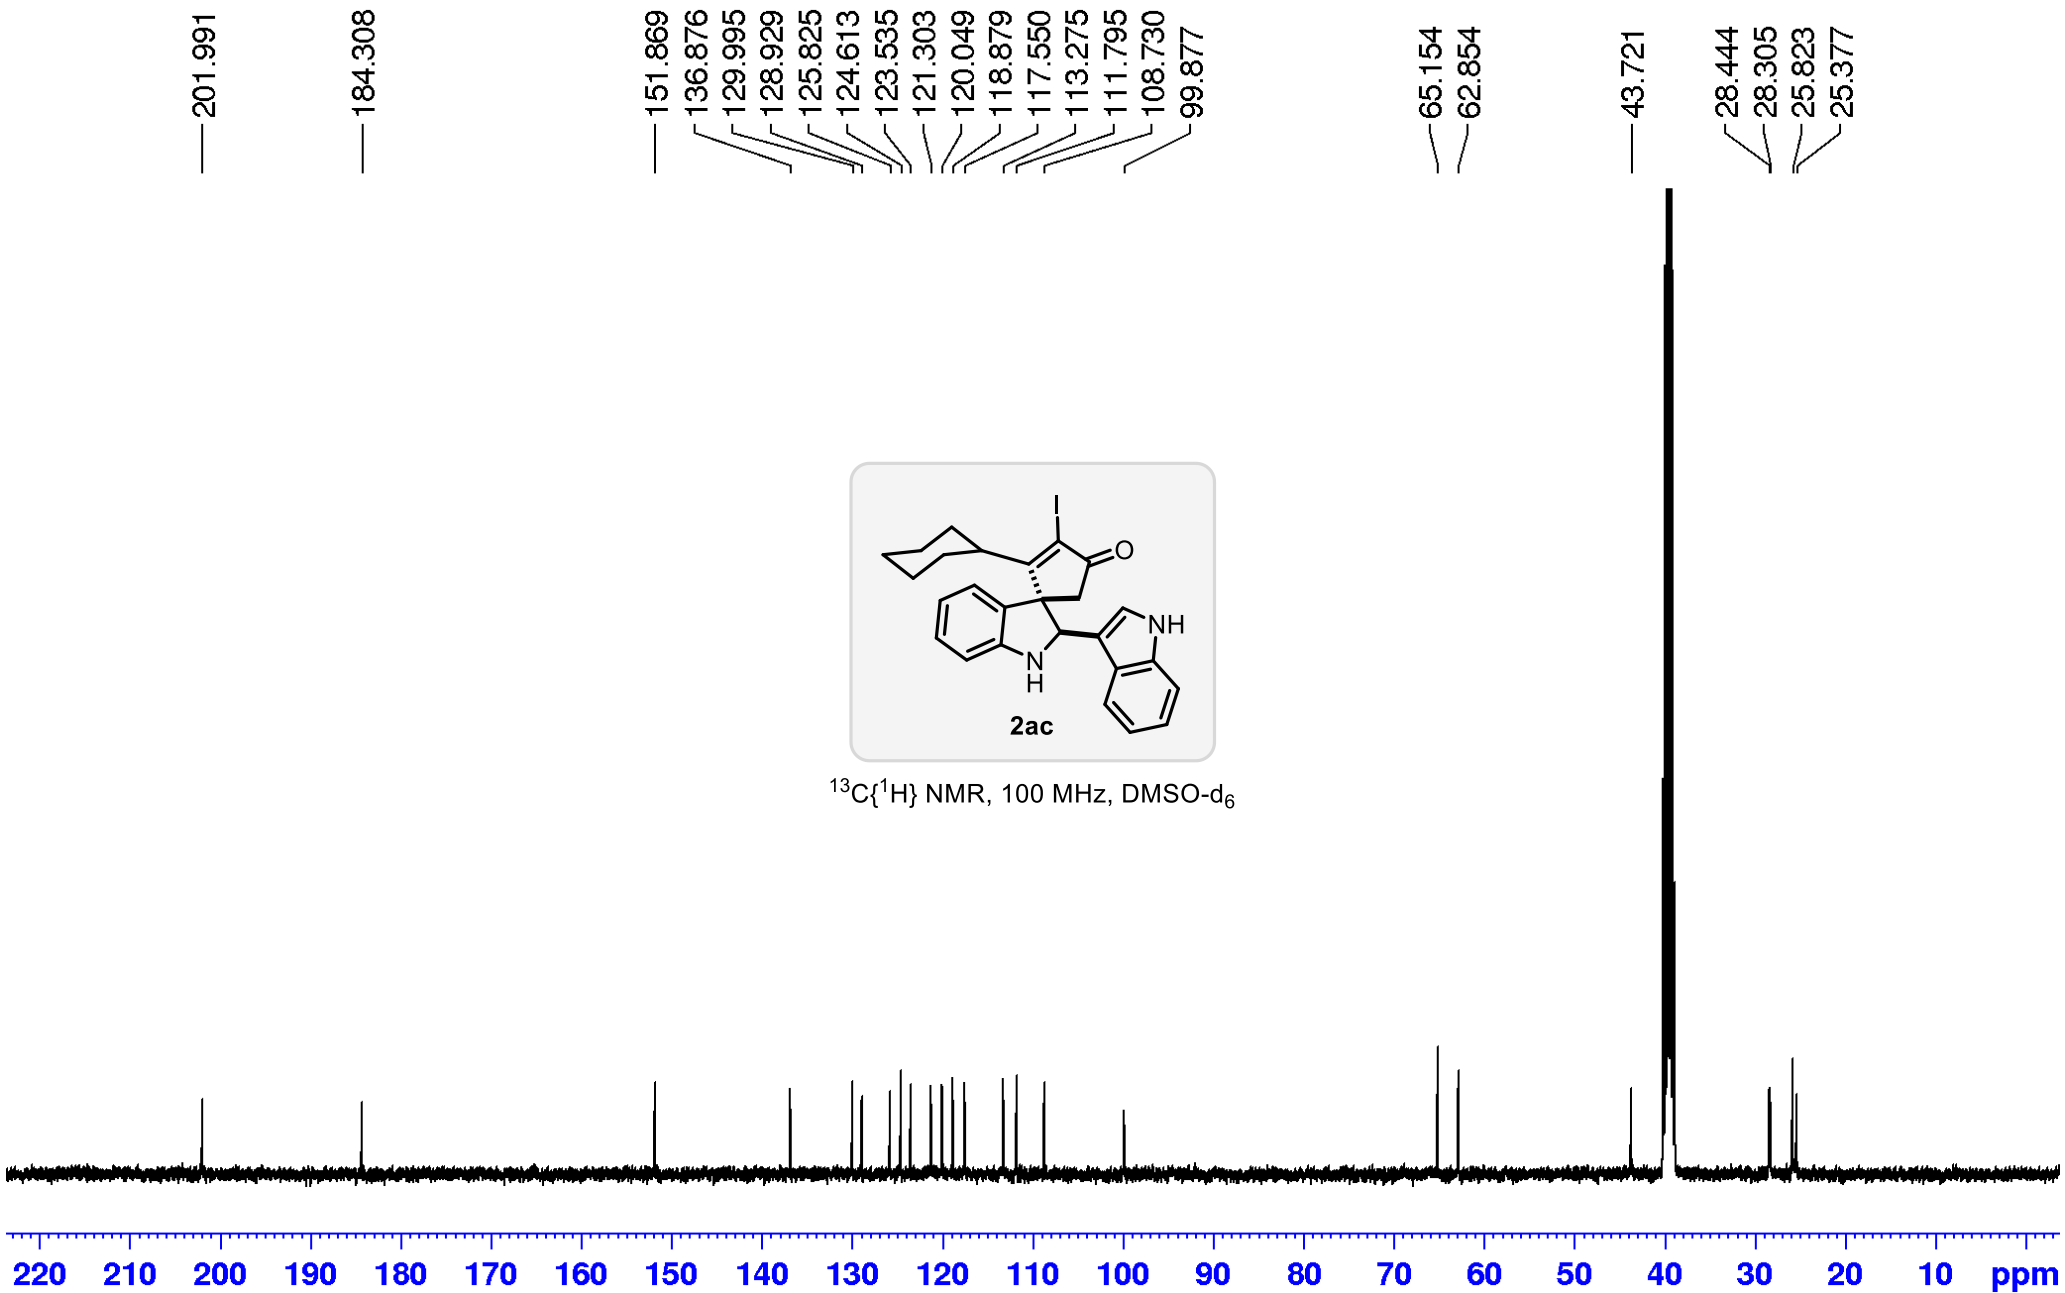

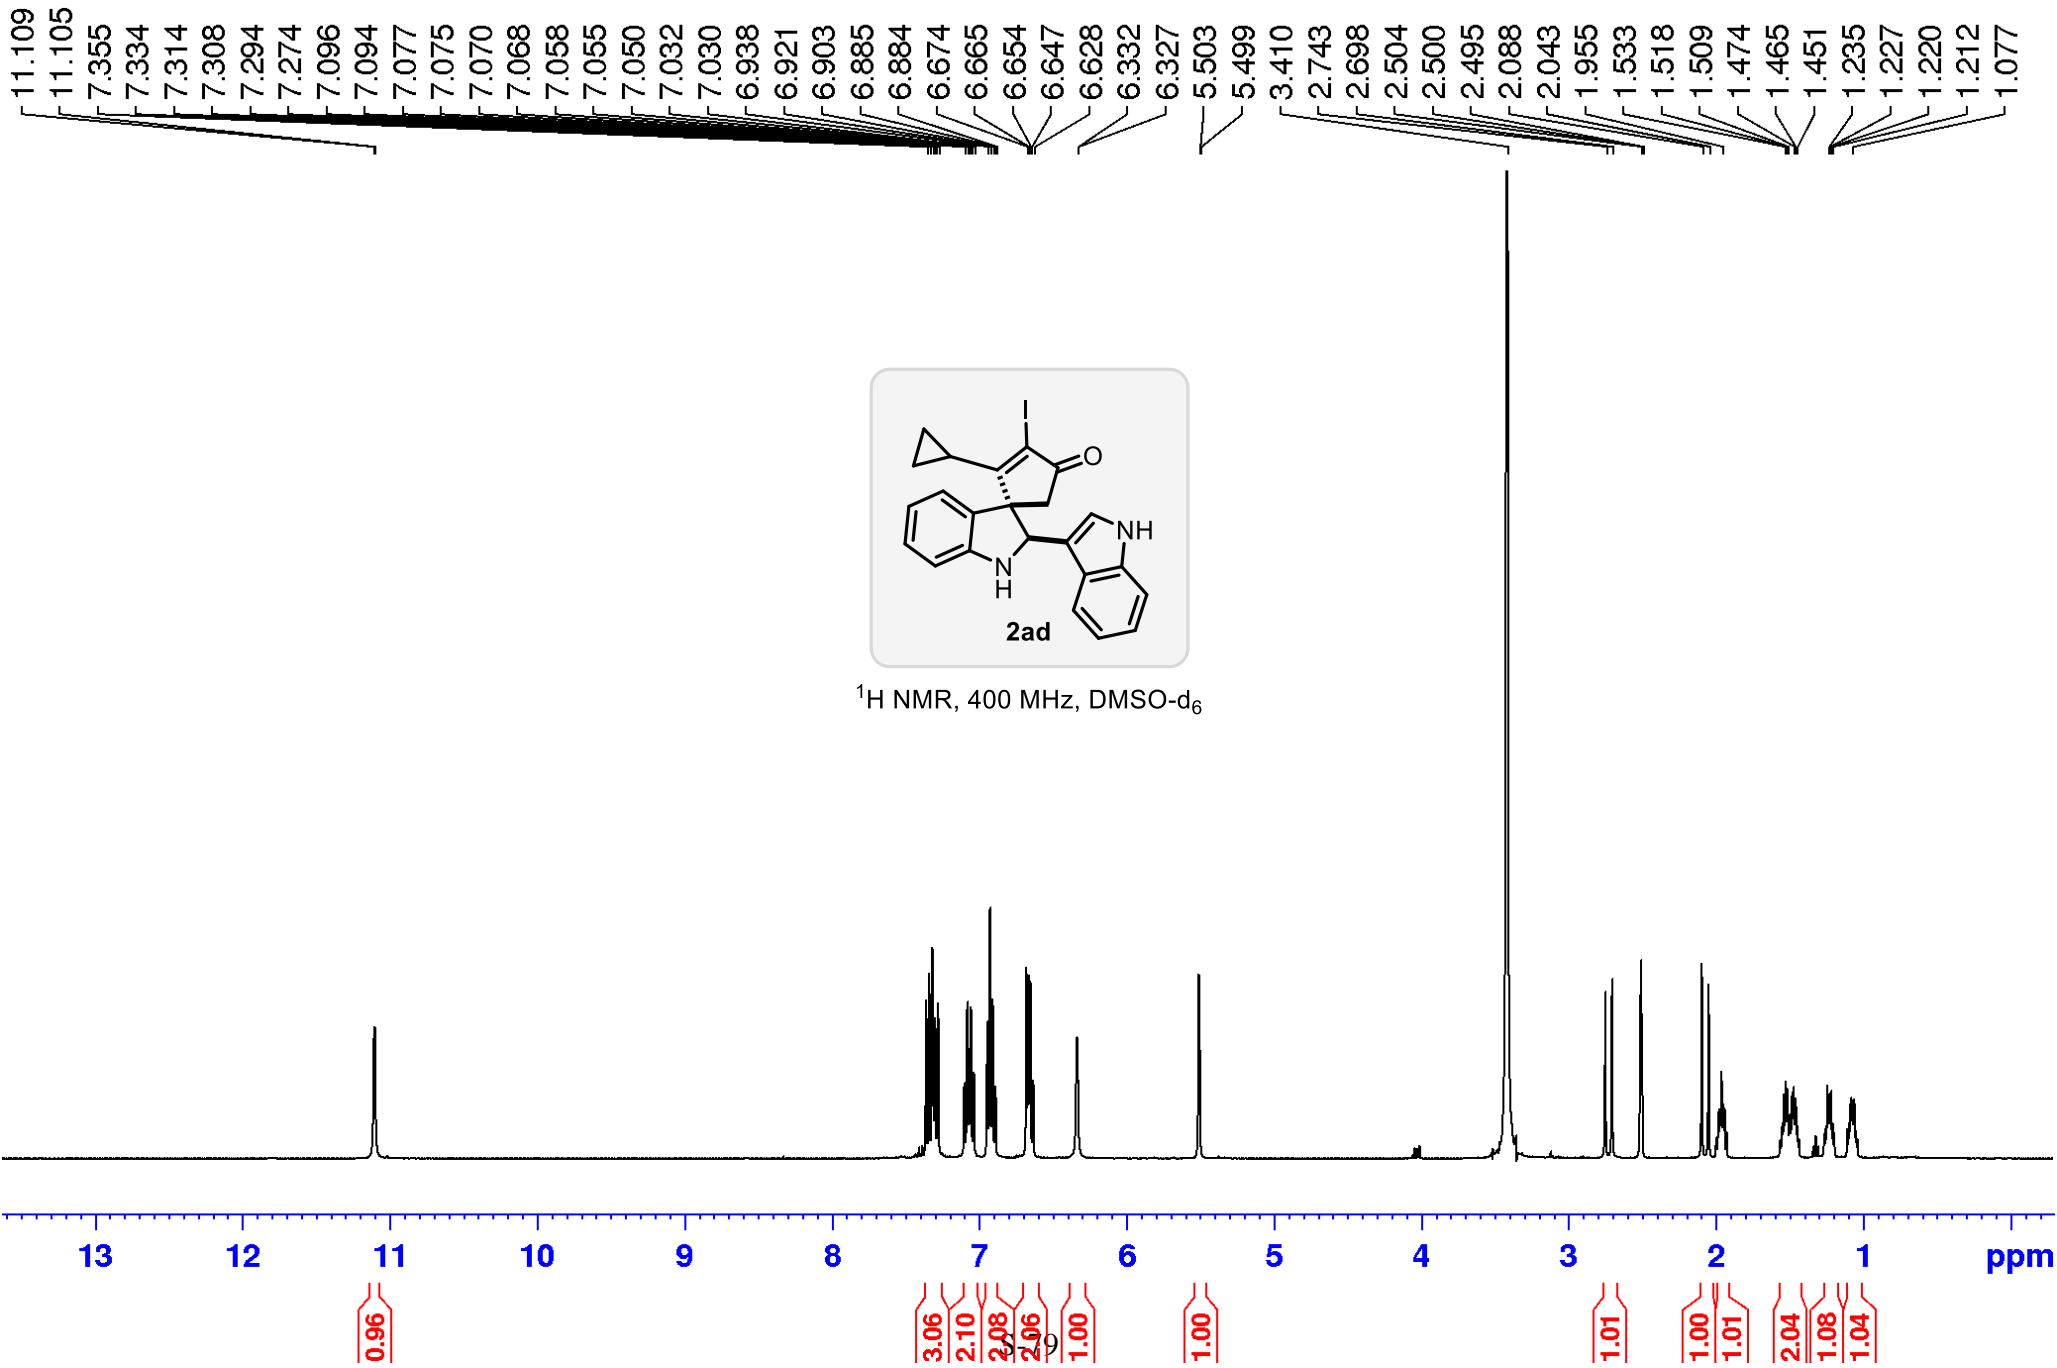

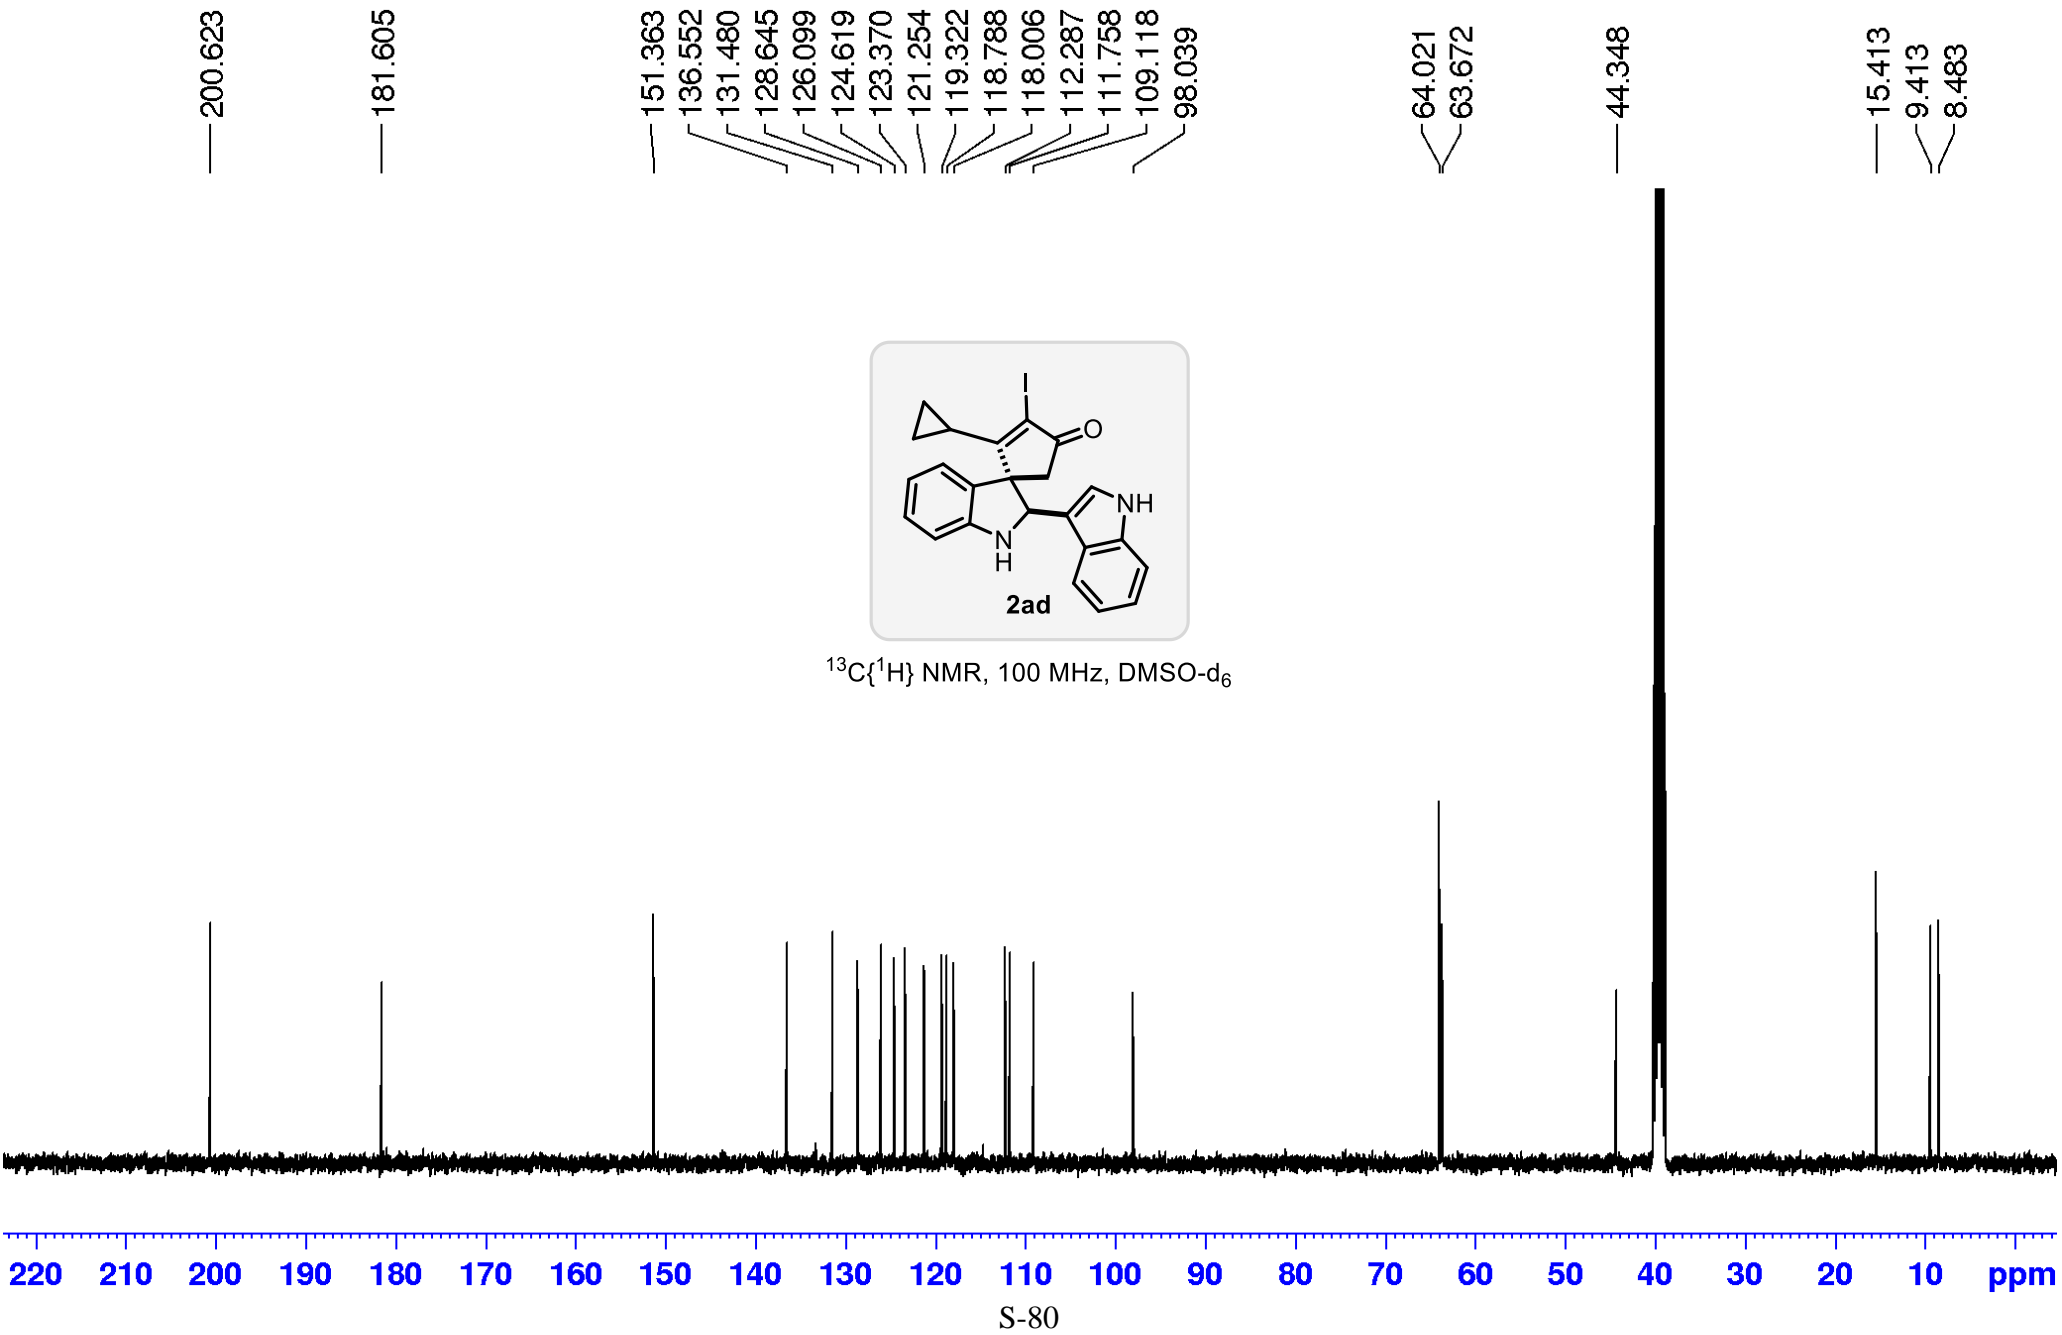



10.854  
7.454  
7.445  
7.441  
7.432  
7.416  
7.414  
7.404  
7.400  
7.387  
7.383  
7.204  
7.198  
7.191  
7.189  
7.184  
7.180  
7.114  
7.096  
7.080  
7.077  
7.061  
7.058  
7.043  
7.025  
6.740  
6.738  
6.721  
6.719  
6.711  
6.701  
6.695  
6.588  
6.569  
6.232  
6.226  
5.995  
5.989  
5.981  
5.975  
5.790  
4.913  
4.906  
2.533  
2.487  
2.346  
2.300

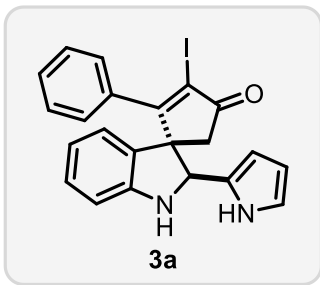

$^1\text{H NMR}$ , 400 MHz,  $\text{DMSO-d}_6$

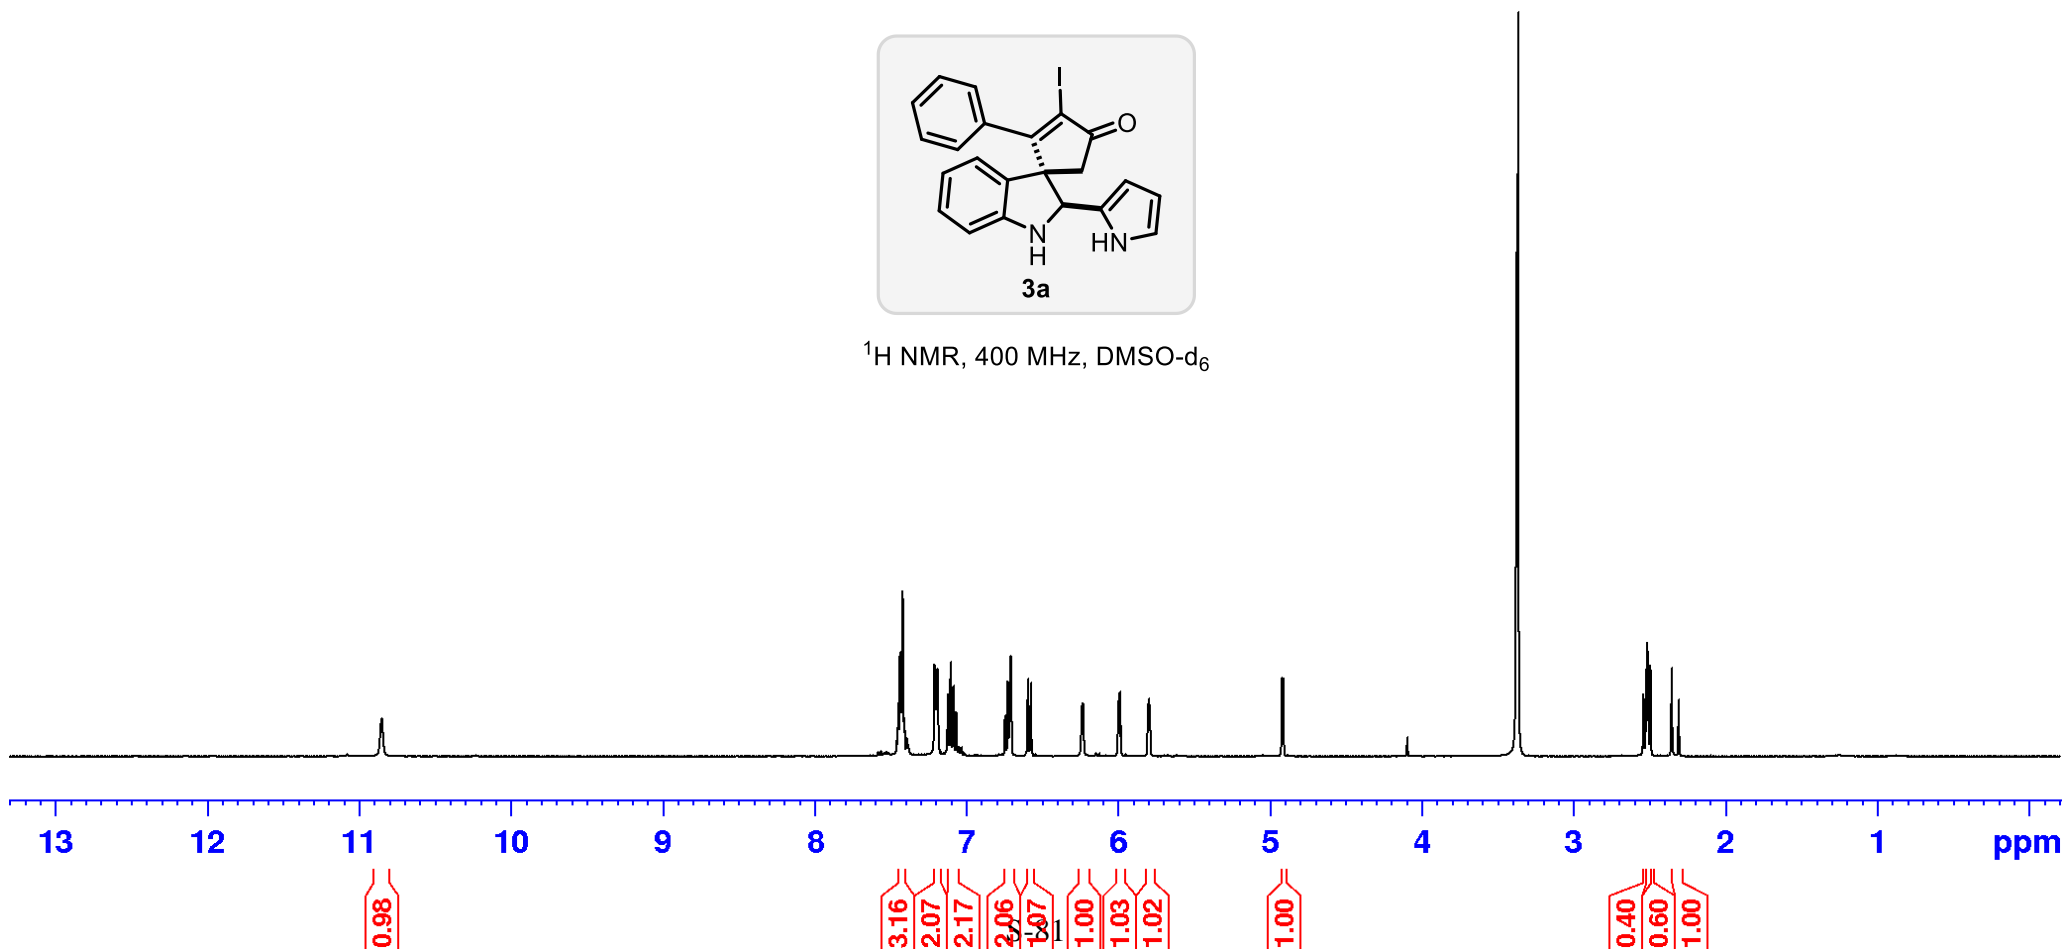

— 201.409

— 177.991

150.763  
136.078  
132.815  
130.130  
129.185  
129.005  
128.769  
128.451  
128.423  
128.043  
123.683  
118.407  
117.826  
109.397  
107.826  
106.132  
105.908

64.556  
62.890

— 44.630

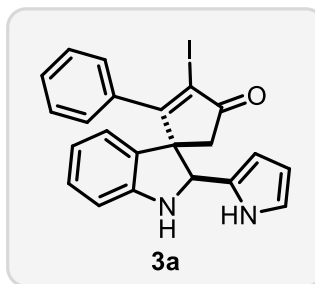

$^{13}\text{C}\{^1\text{H}\}$  NMR, 100 MHz, DMSO- $\text{d}_6$

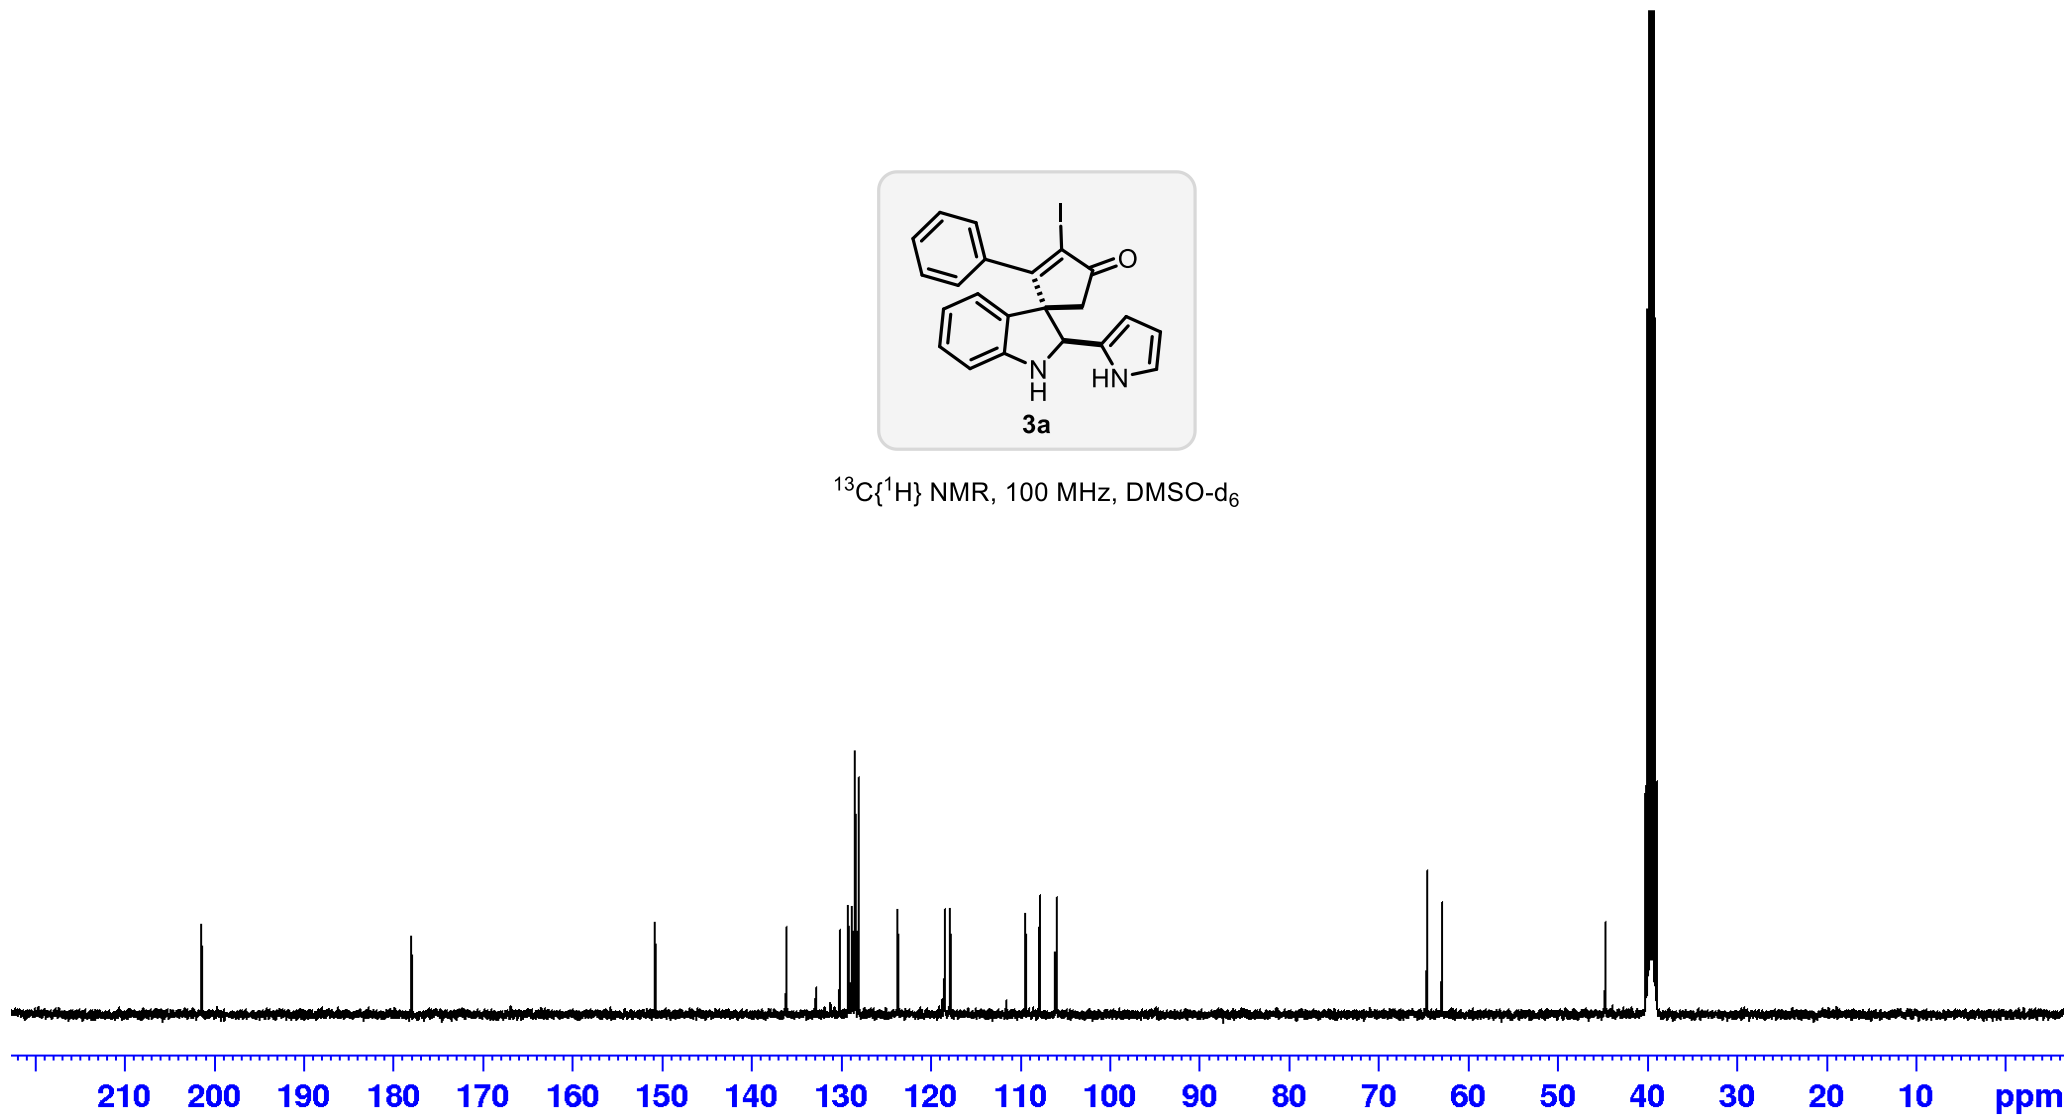

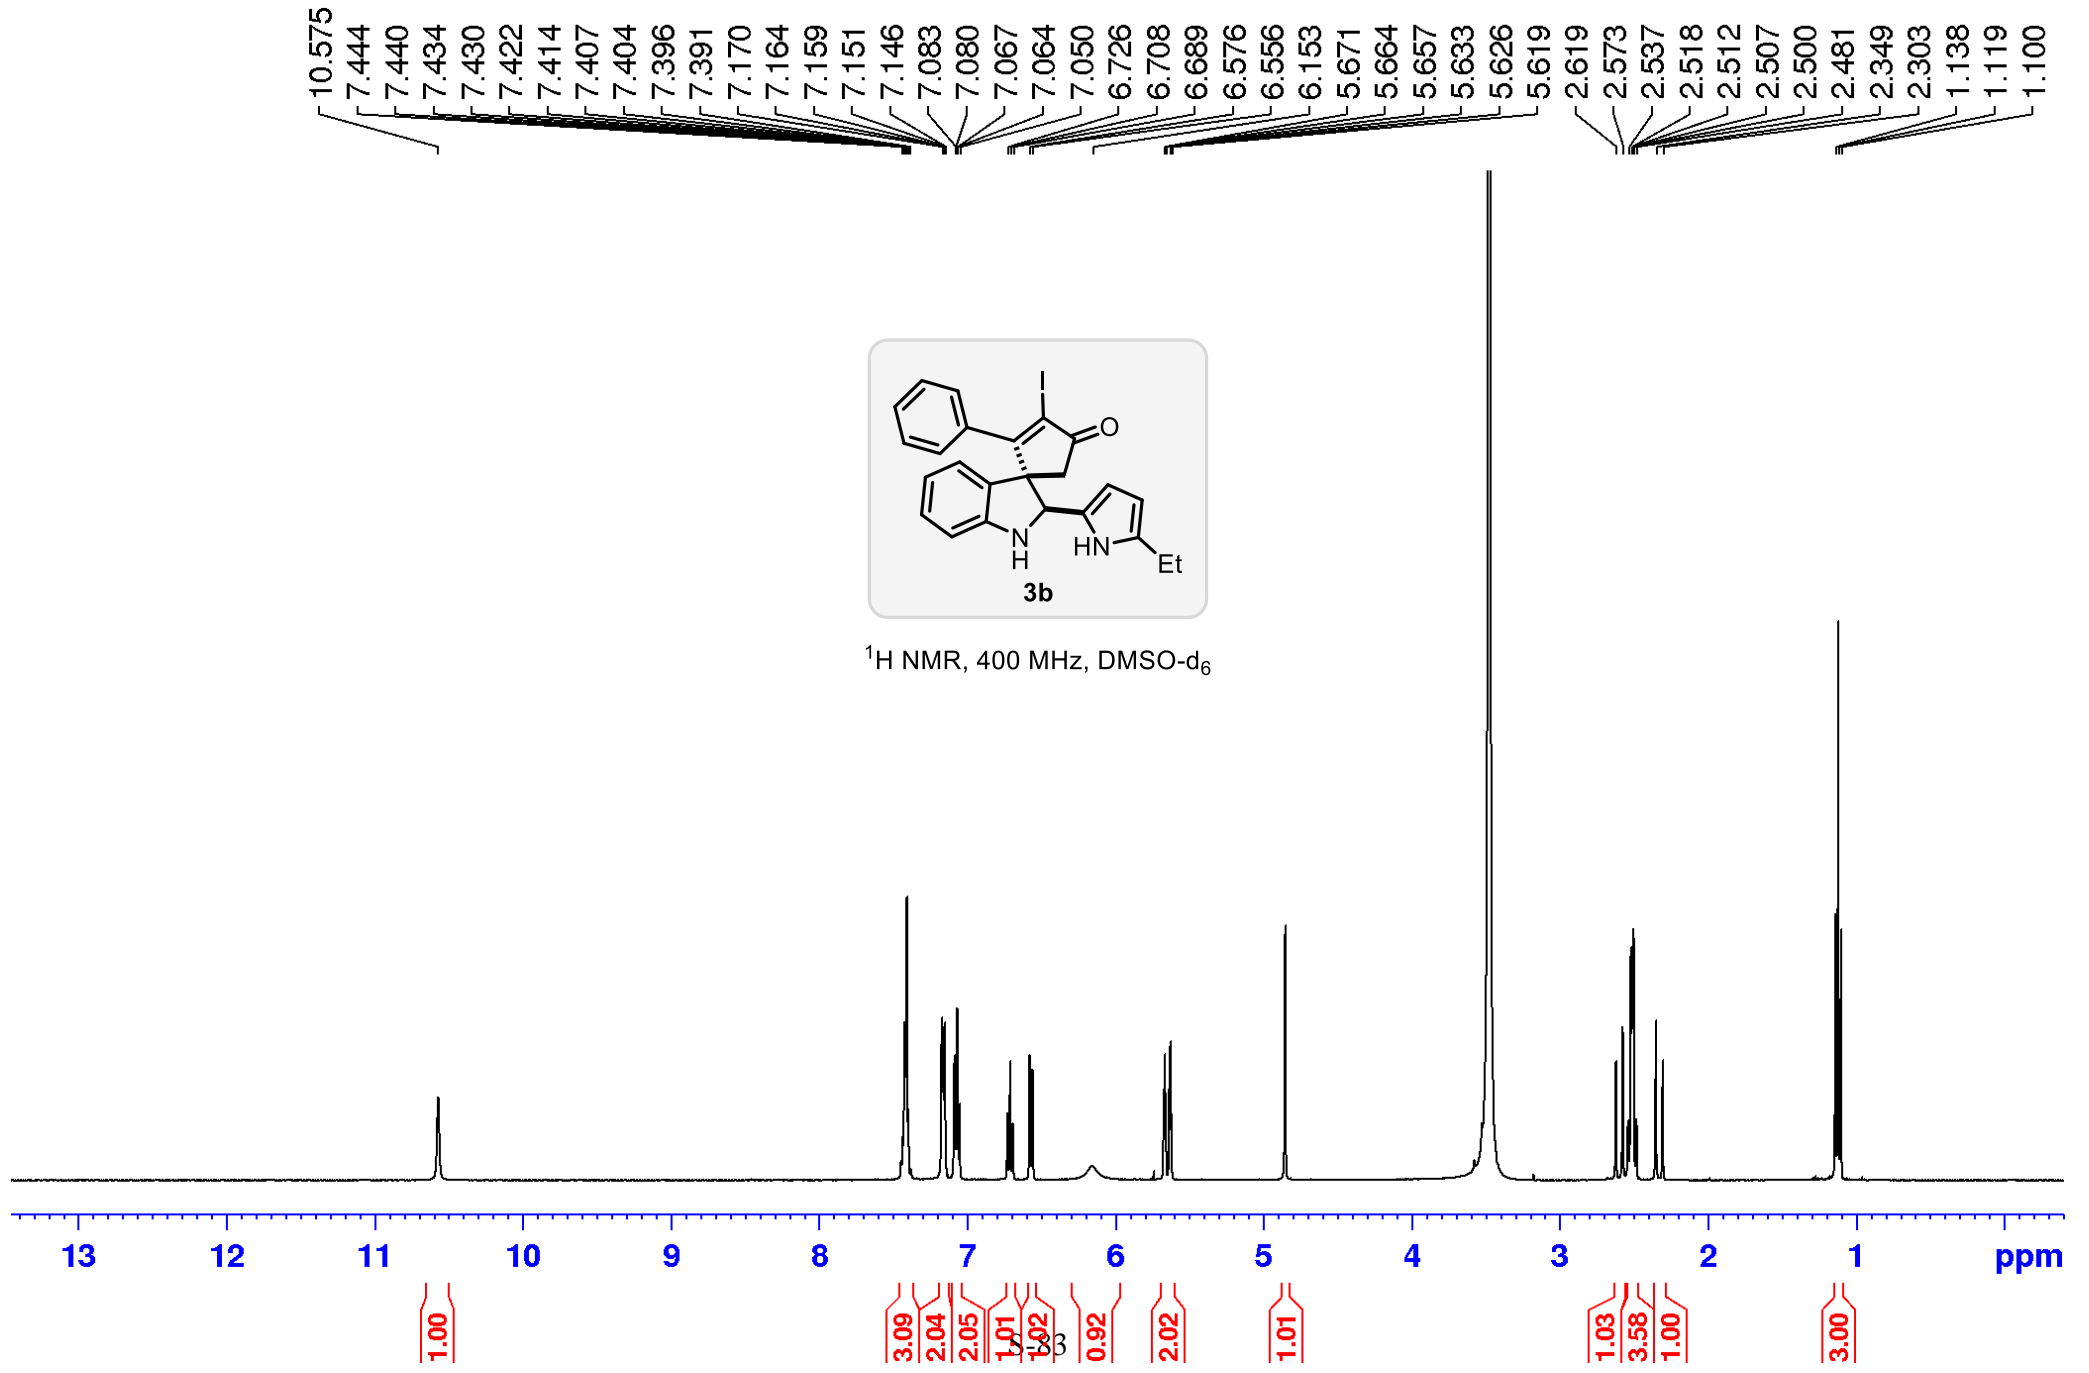

— 201.709

— 178.316

150.884  
136.196  
134.193  
130.220  
129.304  
128.850  
128.548  
128.100  
126.812  
123.716  
118.434  
109.437  
105.983  
105.893  
104.127

64.737  
63.167

— 44.875

— 20.427

— 14.291

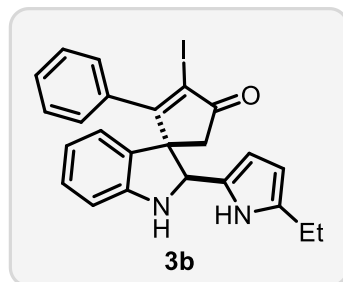

$^{13}\text{C}\{^1\text{H}\}$  NMR, 100 MHz, DMSO- $\text{d}_6$

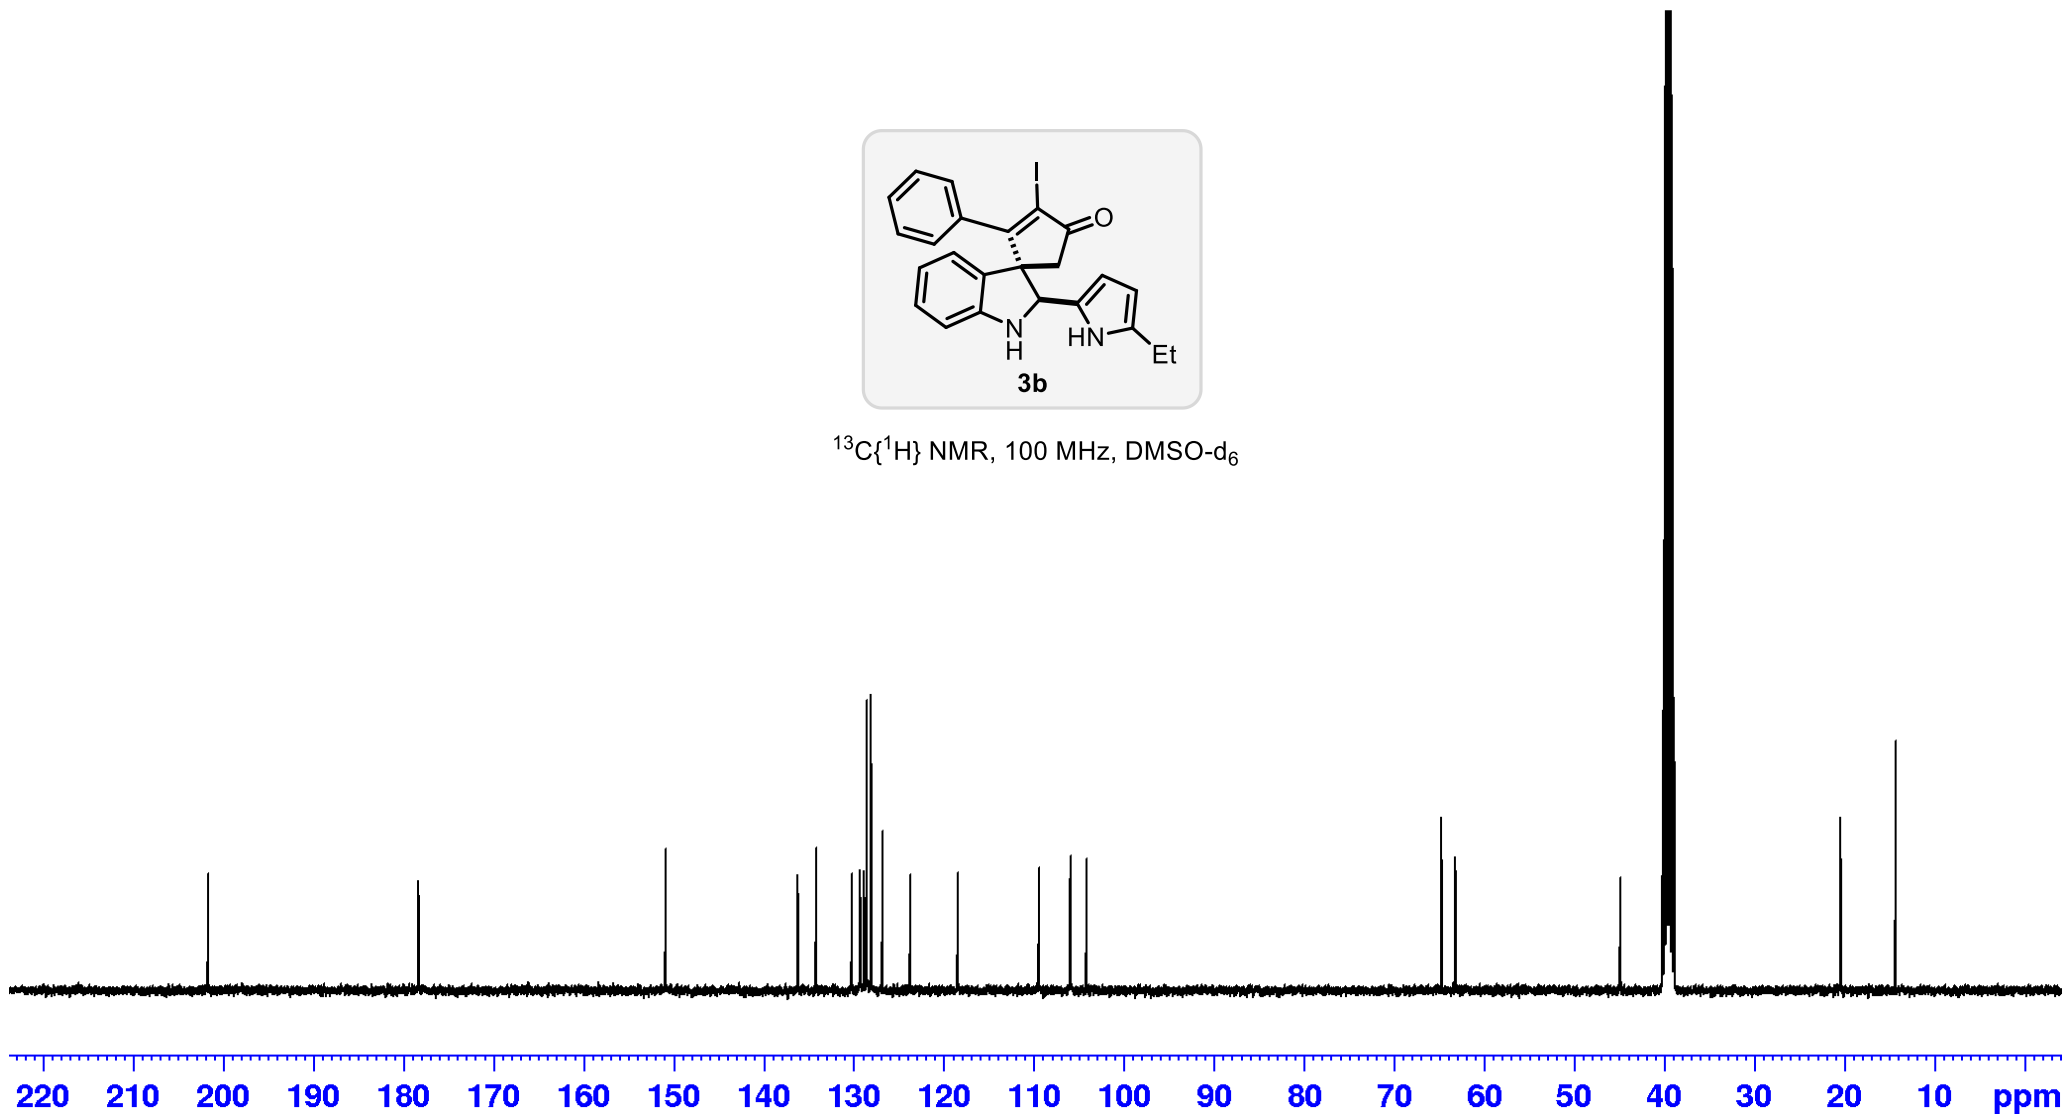

S-84

7.412  
7.409  
7.403  
7.399  
7.395  
7.390  
7.384  
7.376  
7.369  
7.365  
7.361  
7.358  
7.354  
7.105  
7.098  
7.095  
7.084  
7.079  
7.075  
7.060  
7.057  
7.000  
6.983  
6.699  
6.693  
6.688  
6.682  
6.679  
6.663  
6.661  
6.645  
6.642  
6.521  
6.502  
6.146  
6.141  
5.950  
5.941  
5.939  
5.934  
5.924  
5.043  
5.038  
2.651  
2.604  
2.413  
2.366

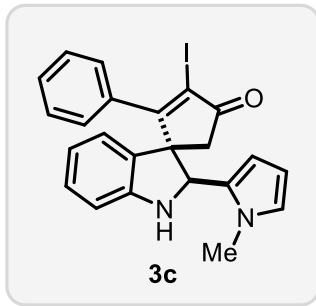

<sup>1</sup>H NMR, 400 MHz, DMSO-d<sub>6</sub>

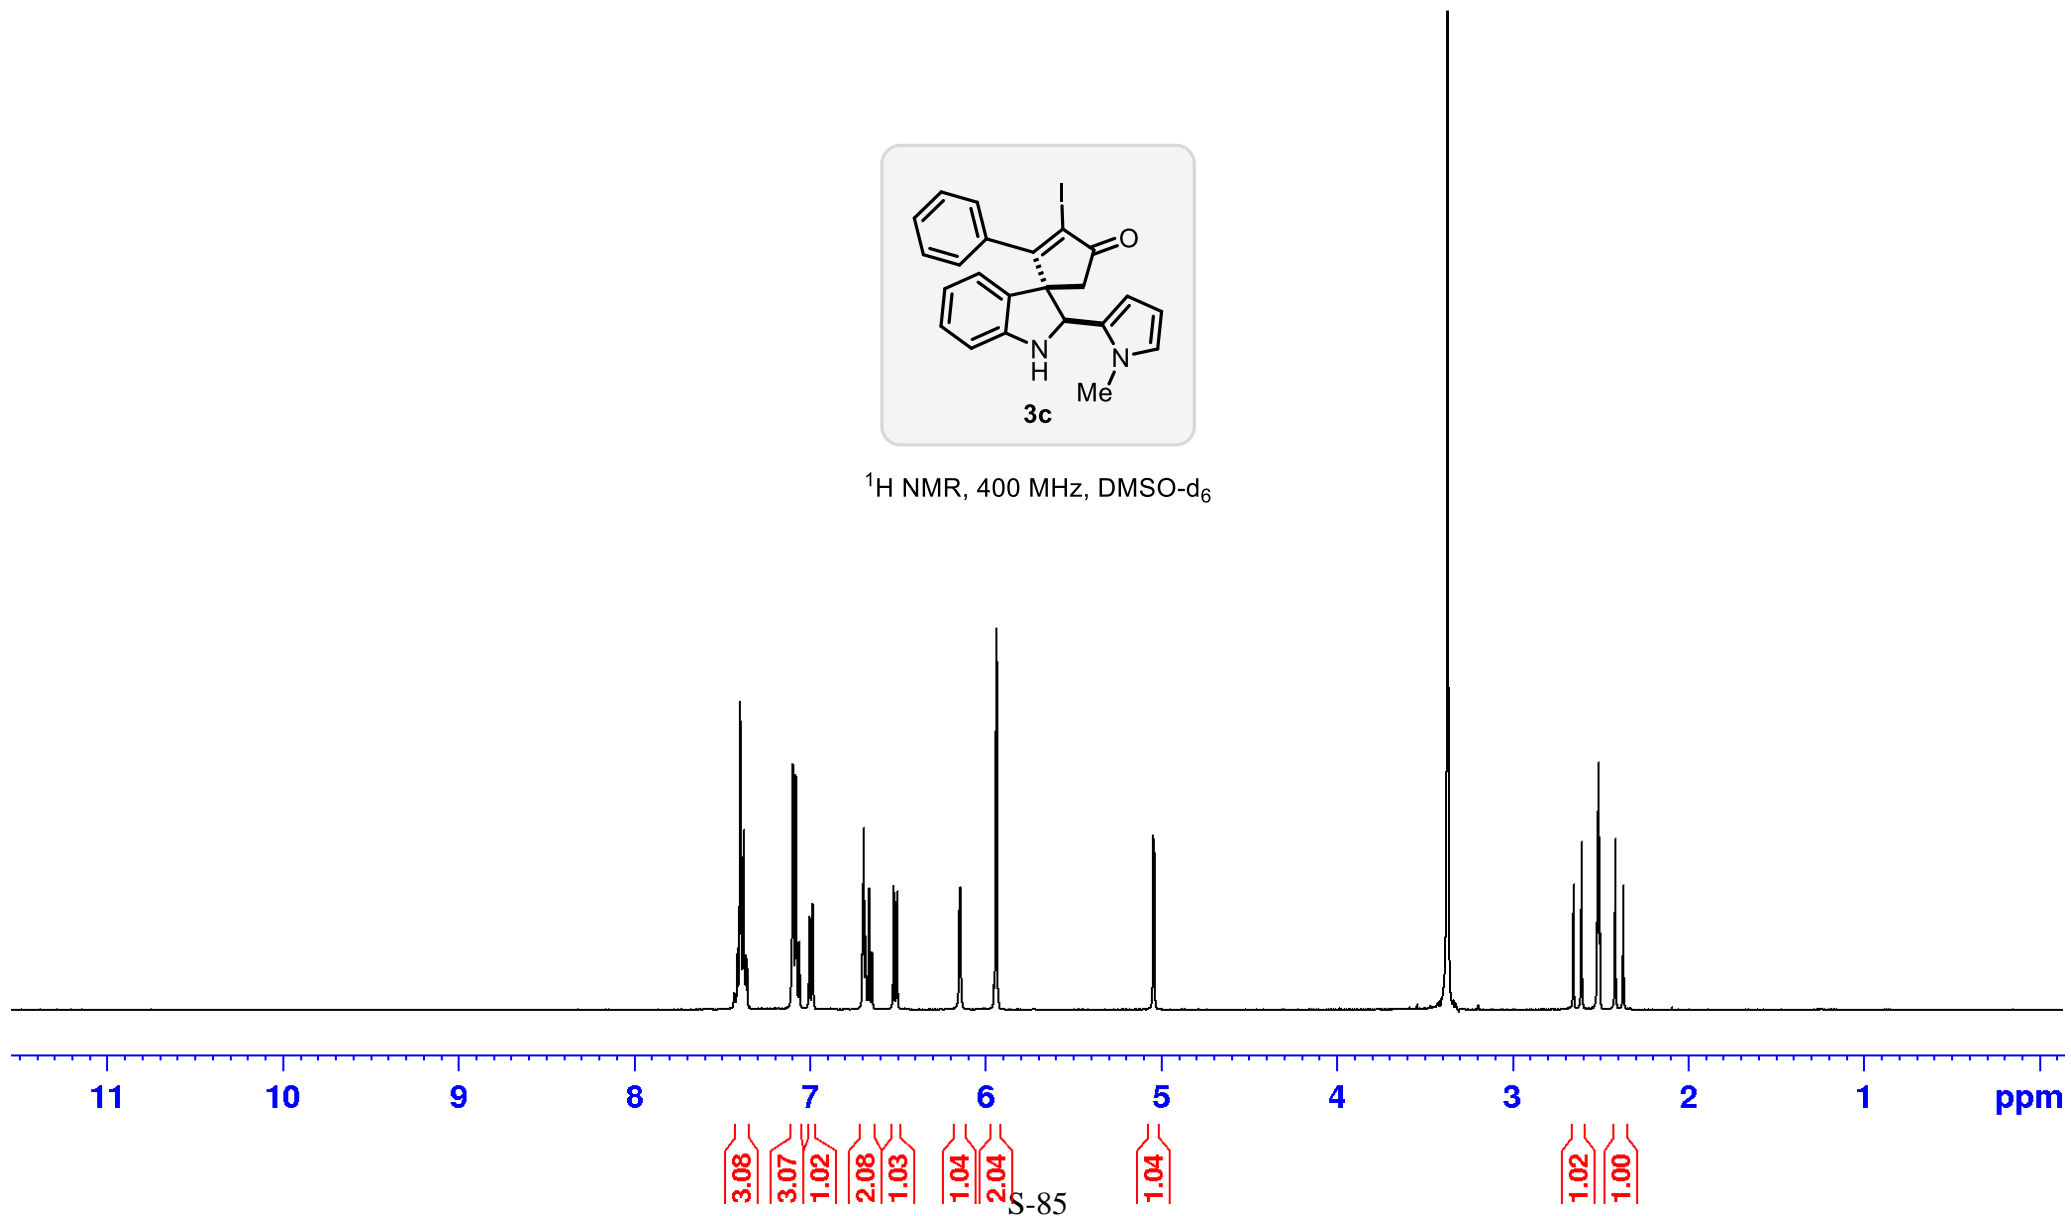

— 201.801

— 178.990

150.929  
135.394  
130.651  
129.483  
129.202  
129.169  
128.300  
127.928  
123.705  
123.279  
117.714  
108.565  
108.359  
106.745  
104.607

63.894  
61.750

— 45.087

— 34.299

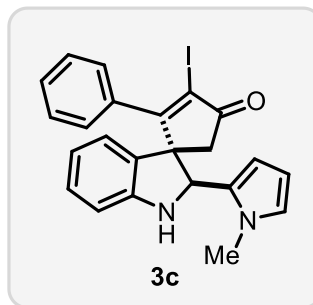

$^{13}\text{C}\{^1\text{H}\}$  NMR, 100 MHz, DMSO- $d_6$

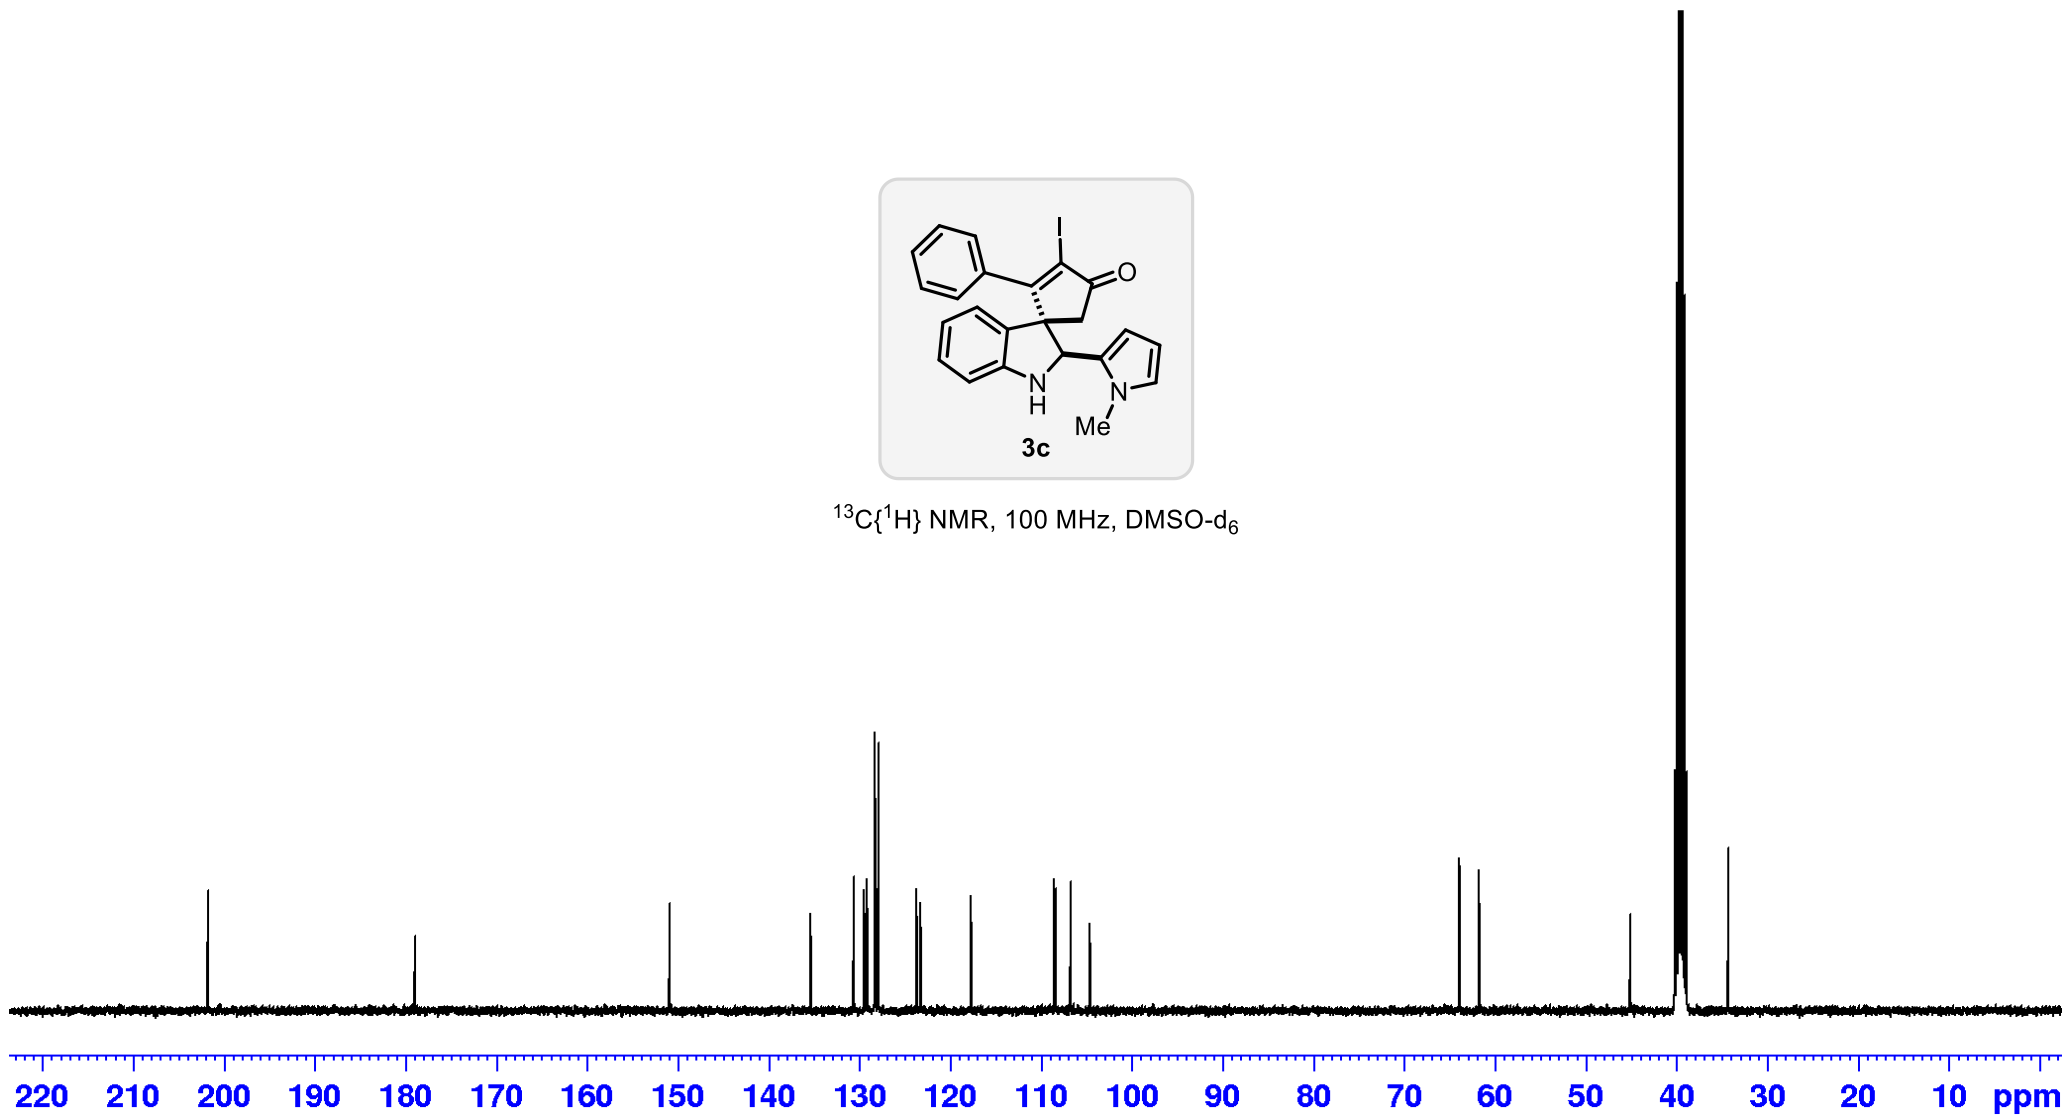

S-86

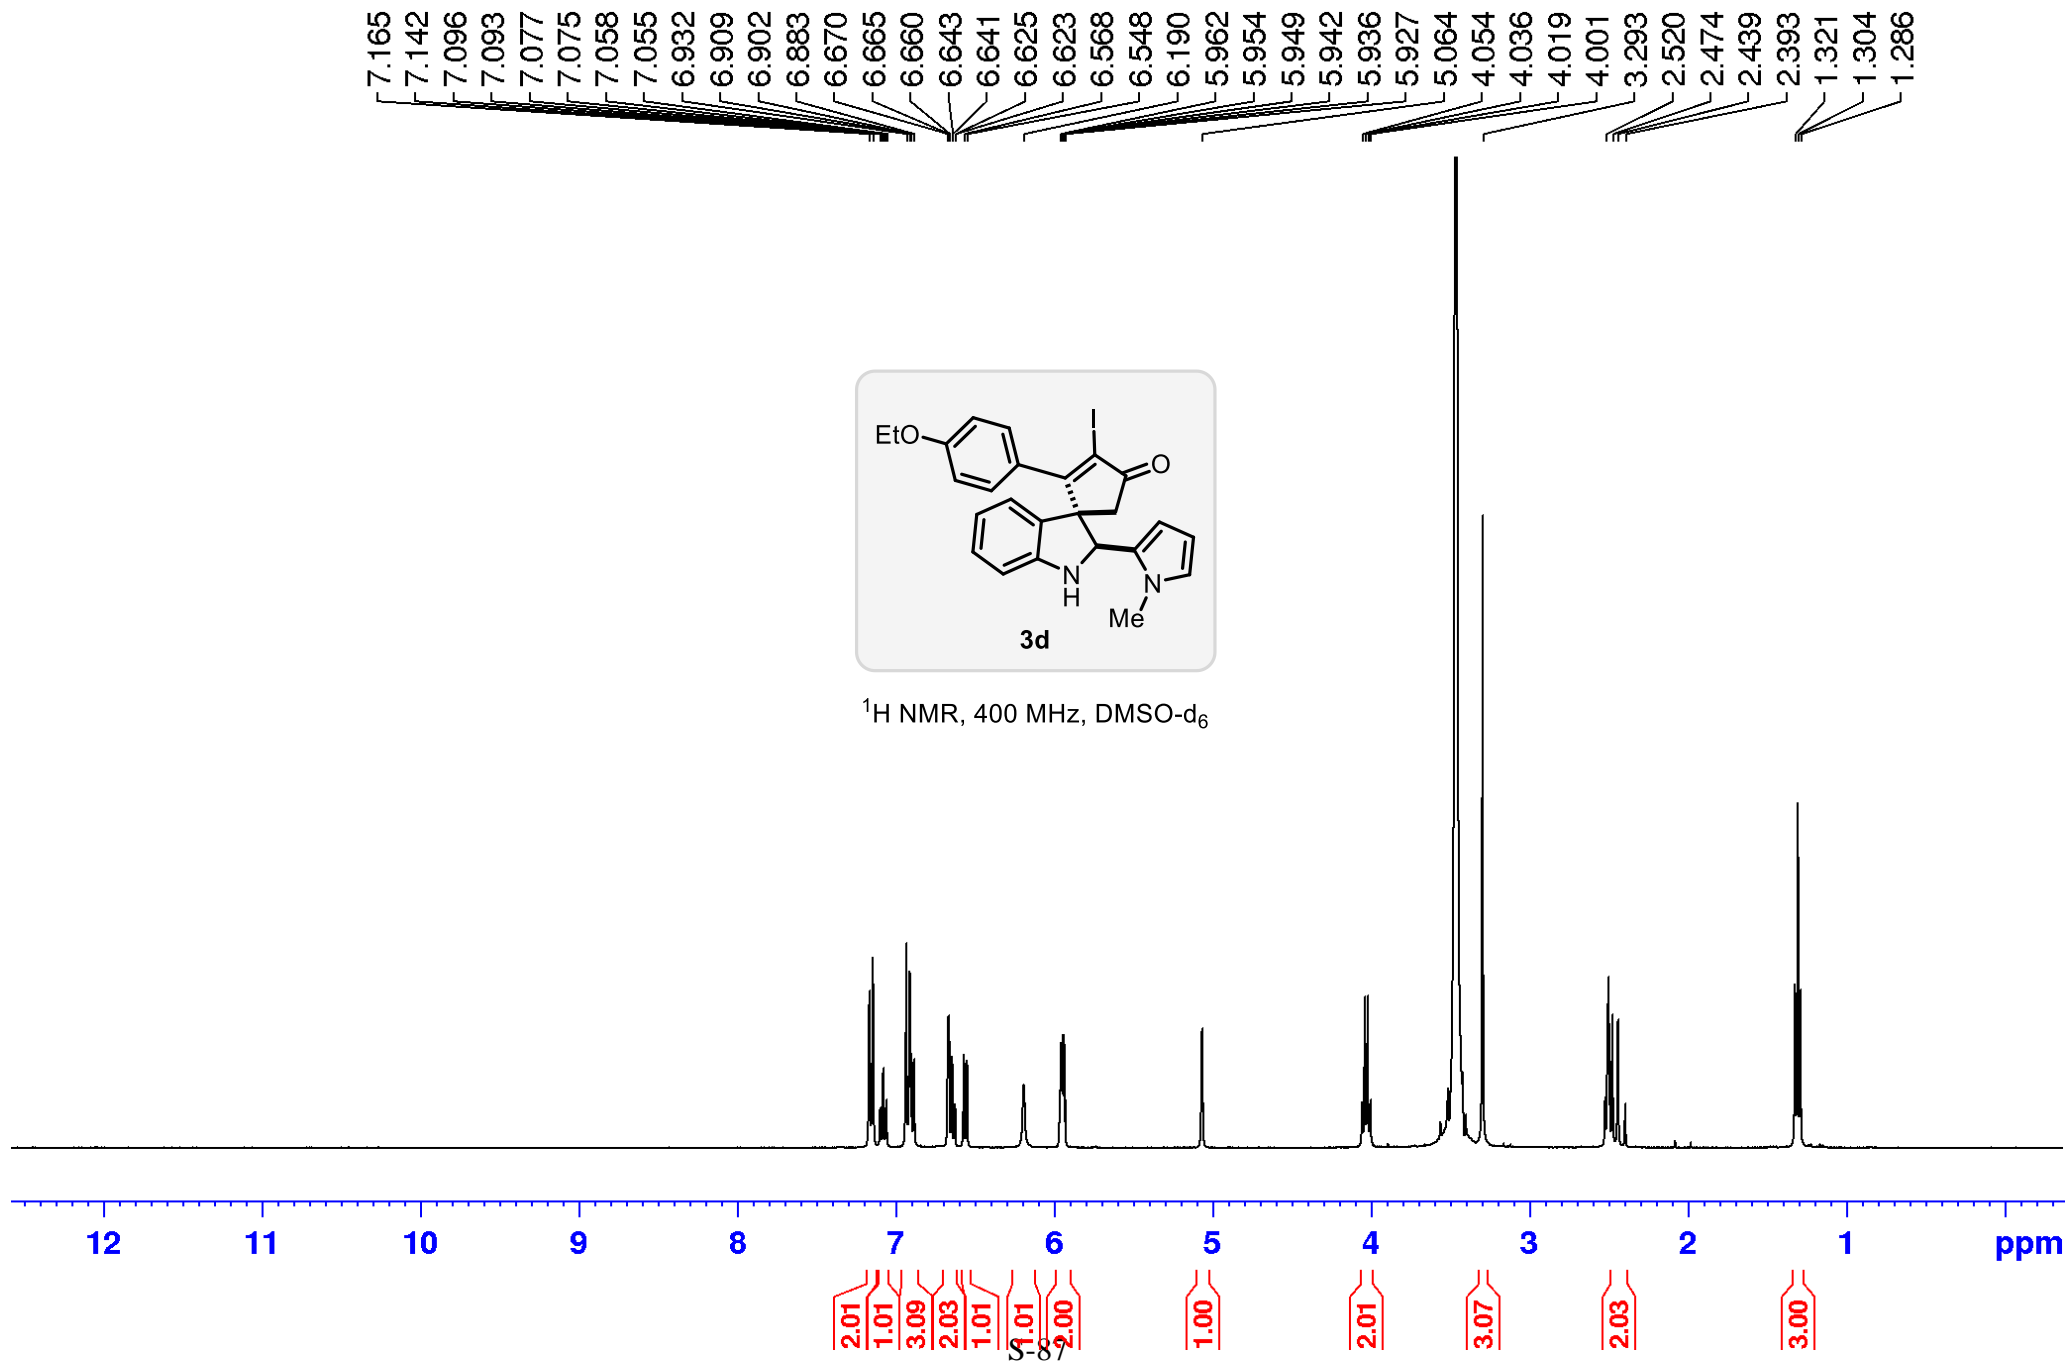

— 201.762

— 177.983

— 159.685

— 150.741

130.540

130.305

130.250

129.222

126.910

123.745

123.088

118.057

114.200

108.772

108.636

106.909

103.428

63.958

63.371

62.196

— 45.565

— 34.273

— 14.709

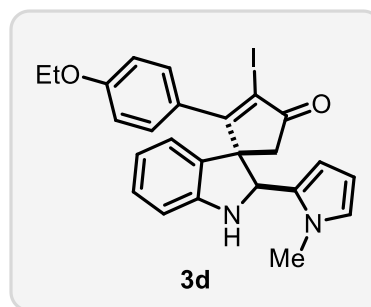

$^{13}\text{C}\{^1\text{H}\}$  NMR, 100 MHz, DMSO- $d_6$

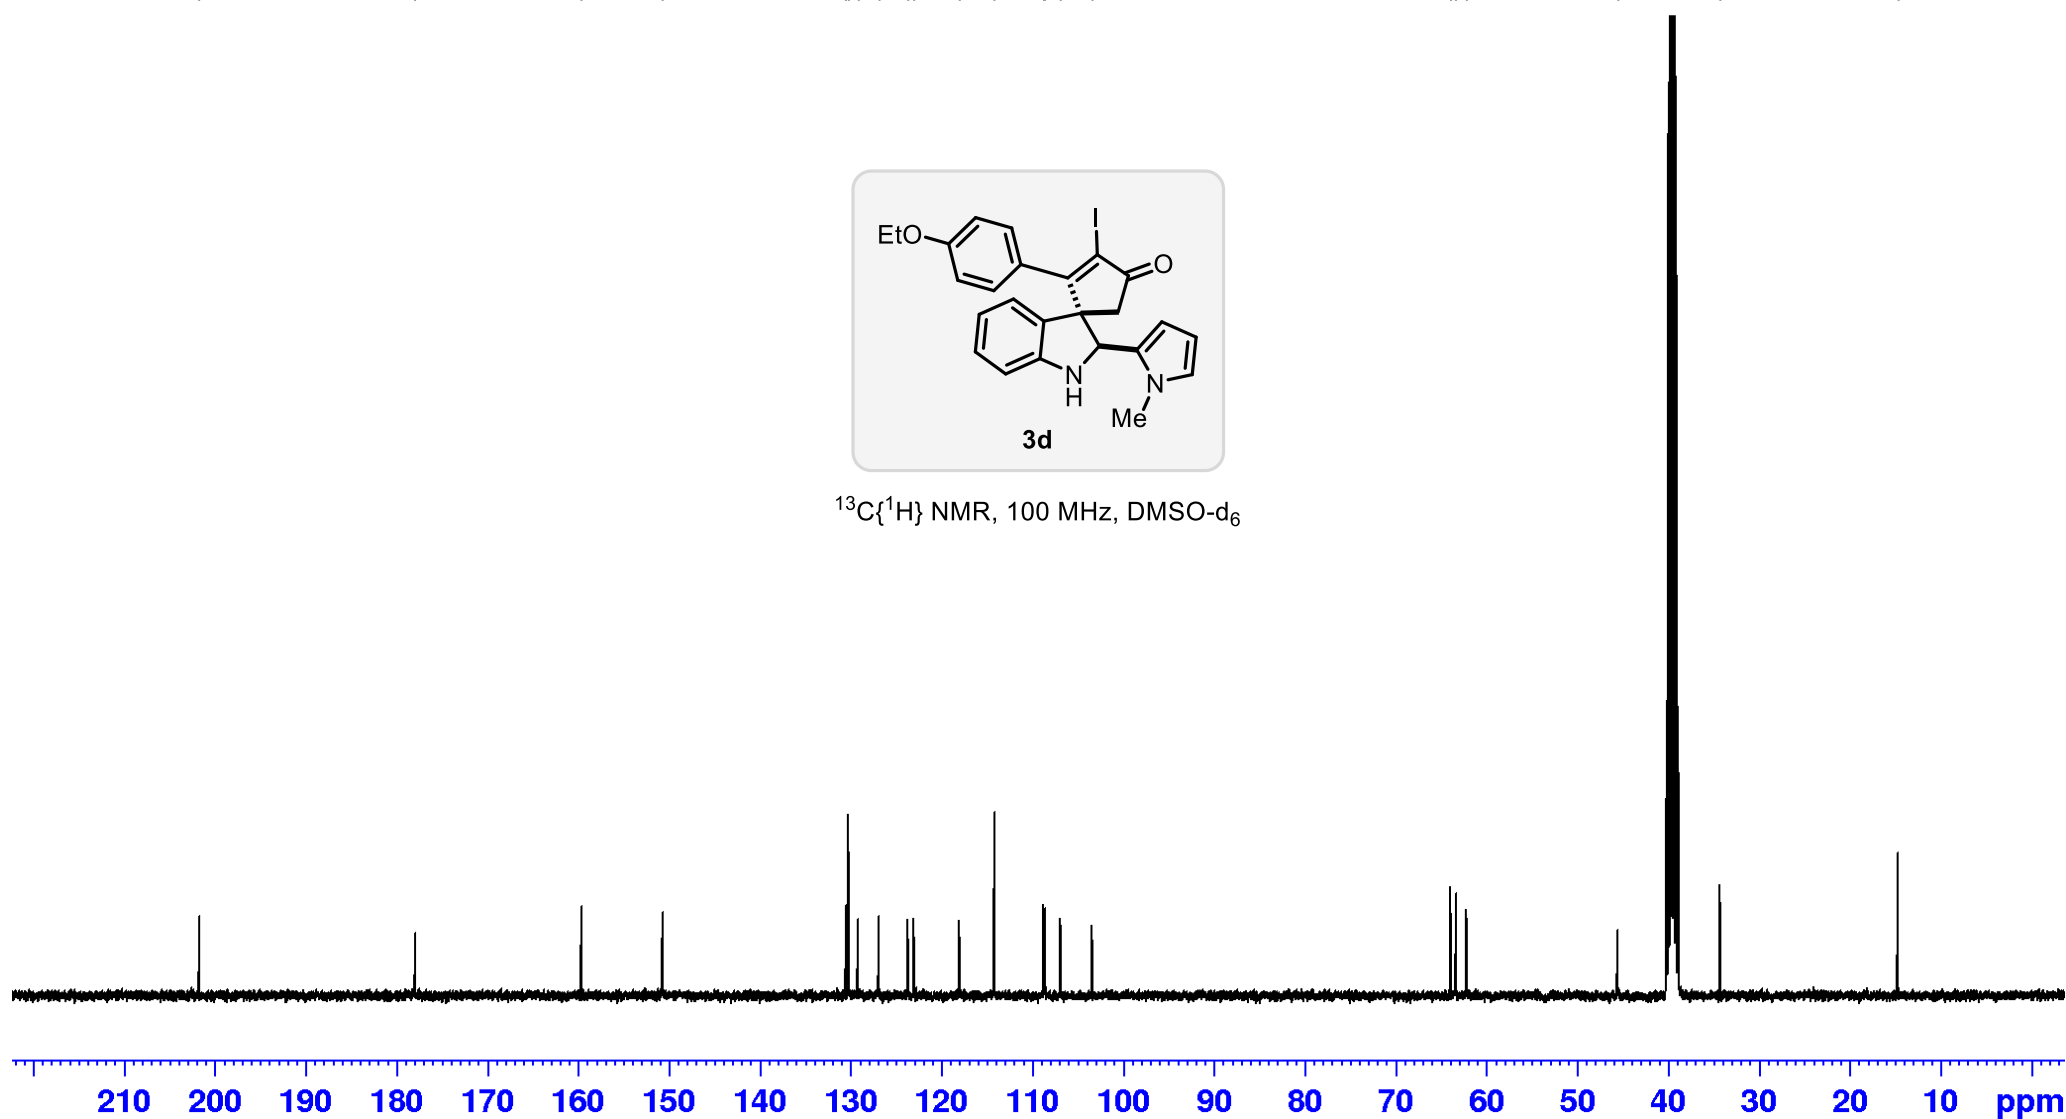

S-88



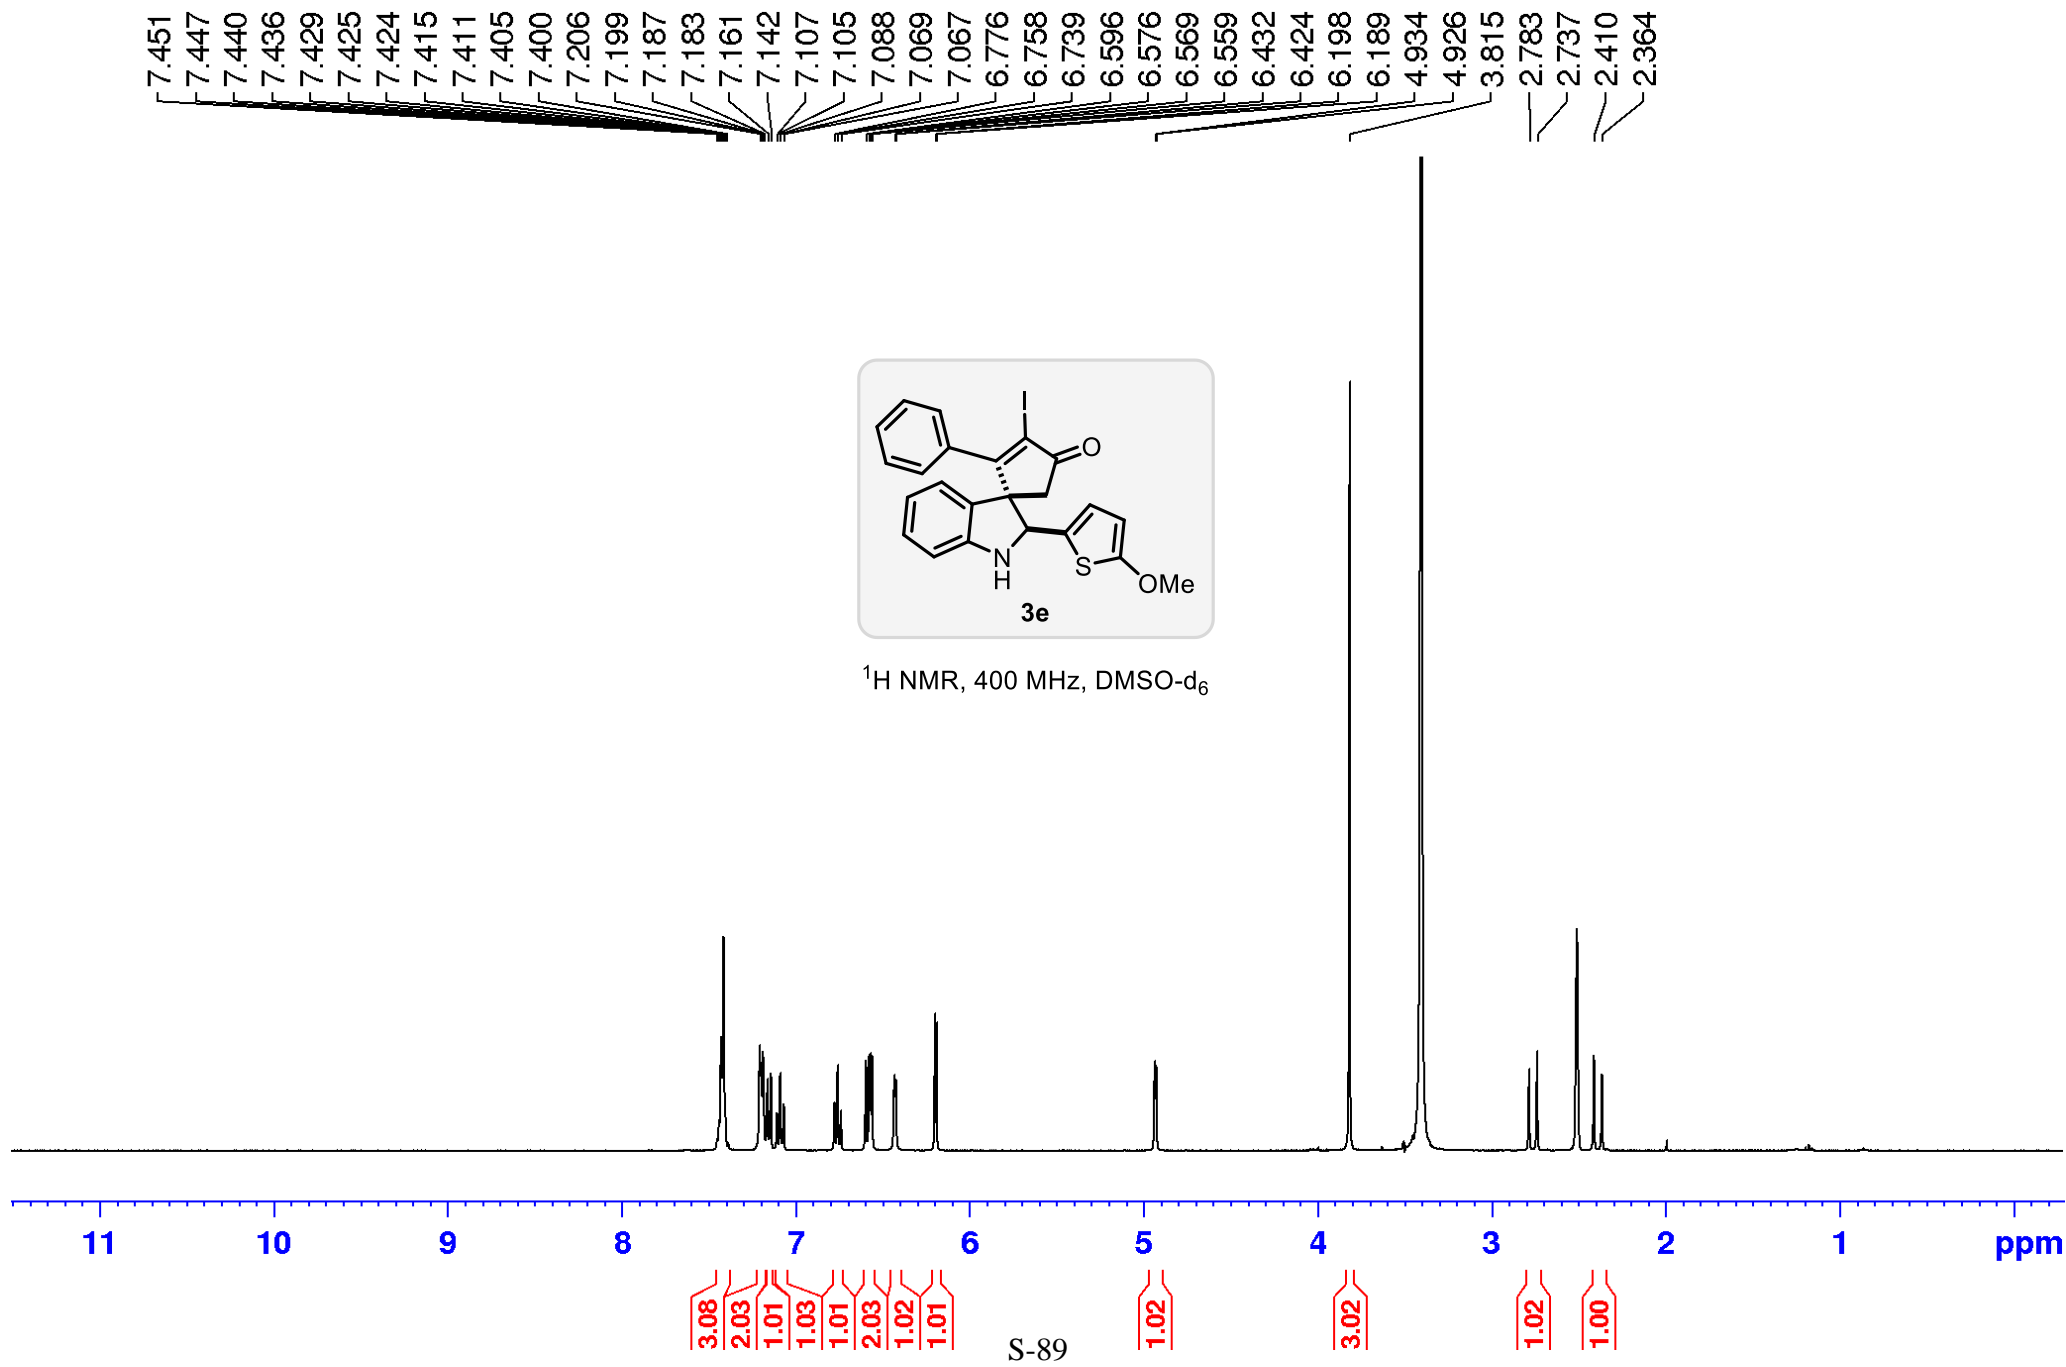

— 201.268

— 177.478

— 164.854

— 150.135

135.852

130.198

129.361

128.958

128.575

128.101

123.815

122.681

119.092

109.835

106.940

103.488

64.355

64.317

60.027

— 44.113

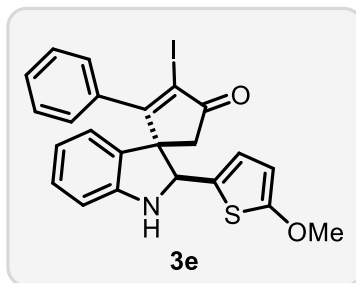

<sup>1</sup>H NMR, 400 MHz, DMSO-d<sub>6</sub>

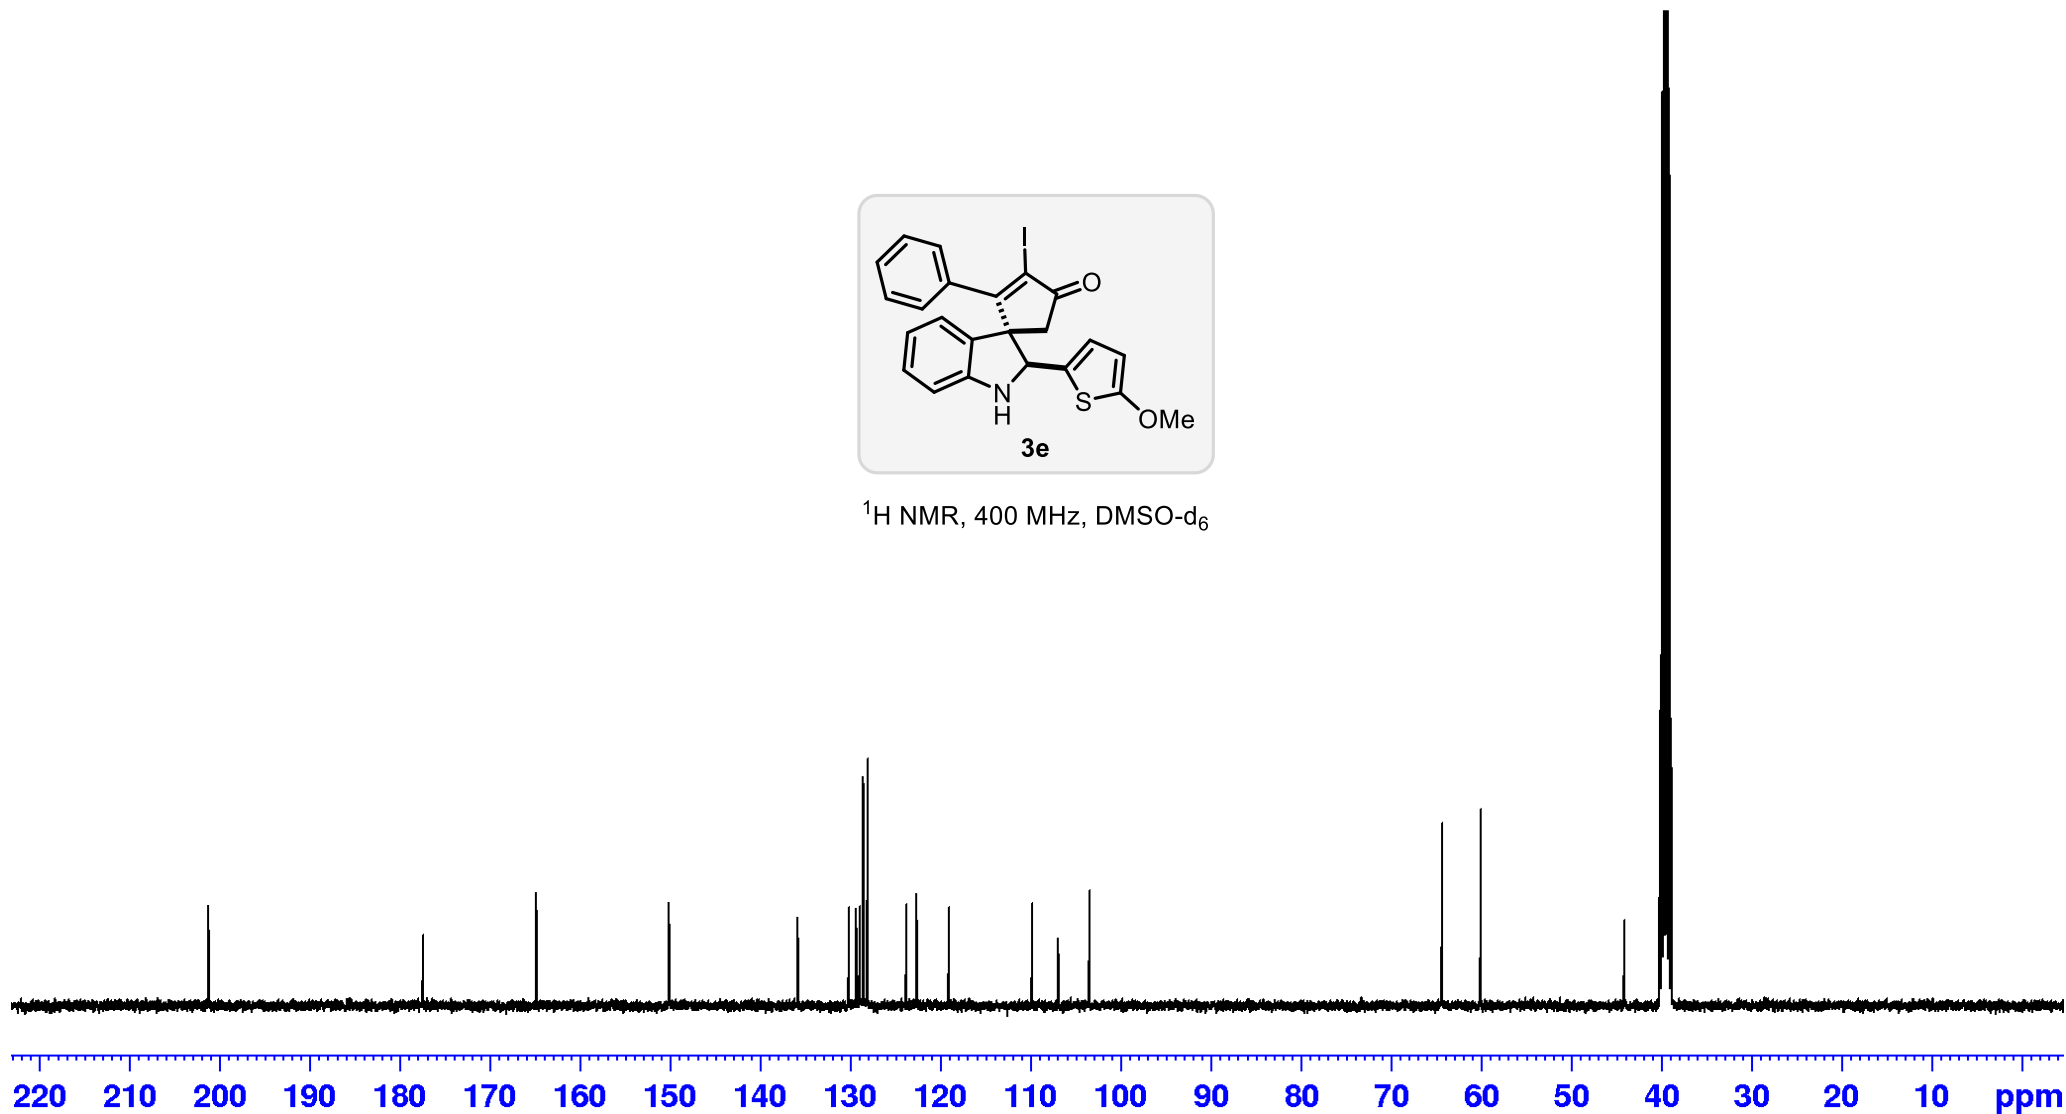

S-90

8.427  
8.403  
8.148  
8.124  
7.818  
7.808  
7.730  
7.705  
7.680  
7.504  
7.495  
7.488  
7.412  
7.402  
7.324  
7.316  
7.310  
7.307  
7.278  
7.254  
7.230  
7.167  
7.143  
7.124  
7.121  
7.039  
7.021  
6.753  
6.735  
6.716  
6.653  
6.634  
6.366  
5.648

2.481  
2.436  
2.369  
2.323

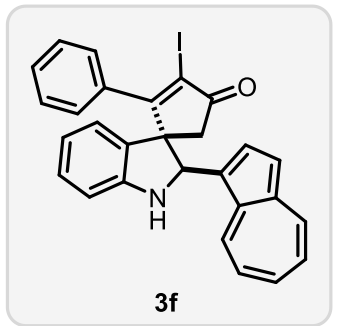

<sup>1</sup>H NMR, 400 MHz, DMSO-d<sub>6</sub>

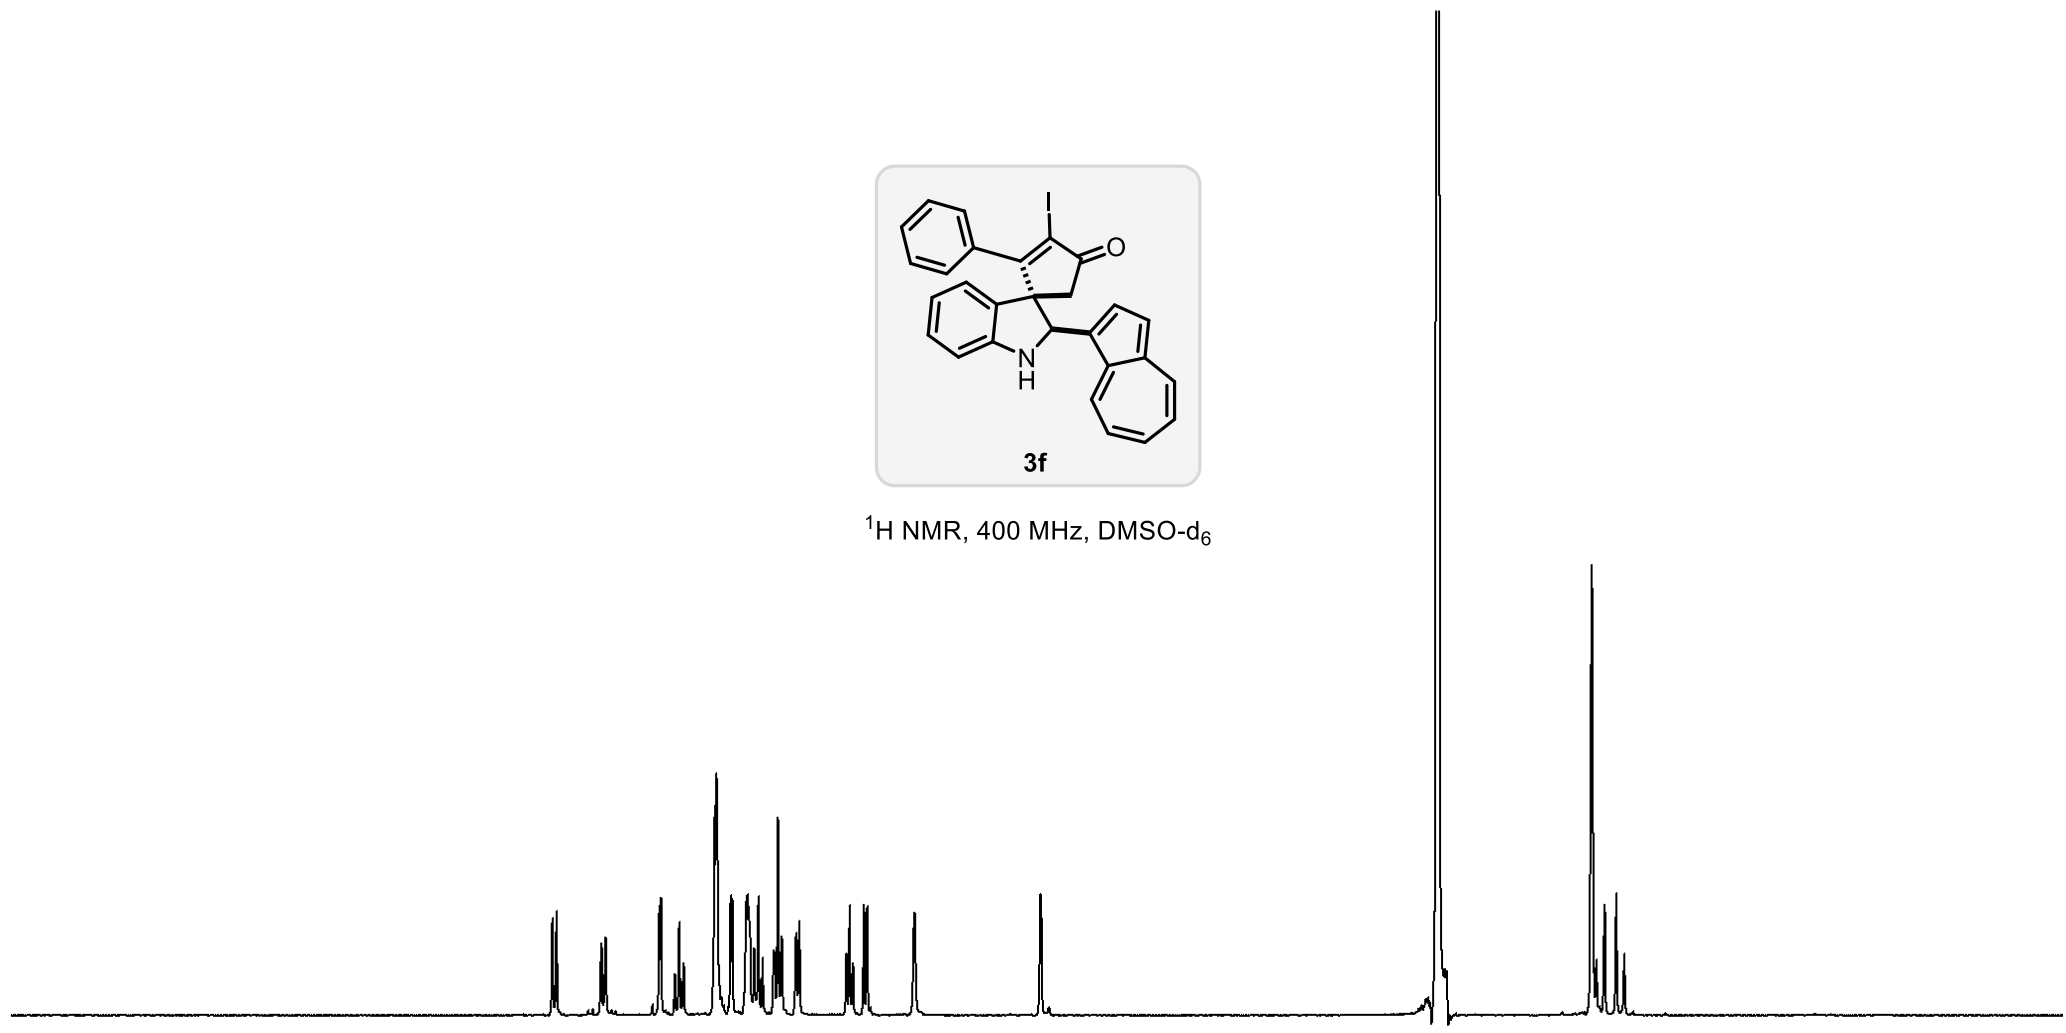

11 10 9 8 7 6 5 4 3 2 1 ppm

0.96  
0.96  
0.98  
0.98  
3.06  
1.01  
3.10  
2.01  
1.01  
1.01  
1.00  
1.00  
0.99

2.05

— 201.492

— 178.069

151.196  
141.220  
138.517  
137.424  
136.790  
135.714  
135.615  
133.937  
130.194  
129.728  
129.096  
128.437  
128.416  
126.973  
123.608  
123.304  
122.659  
118.224  
117.468  
109.005  
105.023

64.414  
63.165

— 45.270

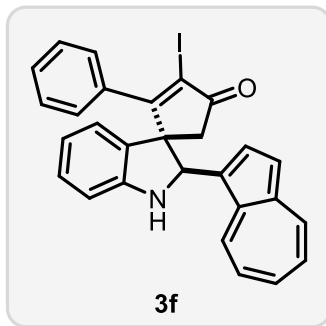

<sup>1</sup>H NMR, 400 MHz, DMSO-d<sub>6</sub>

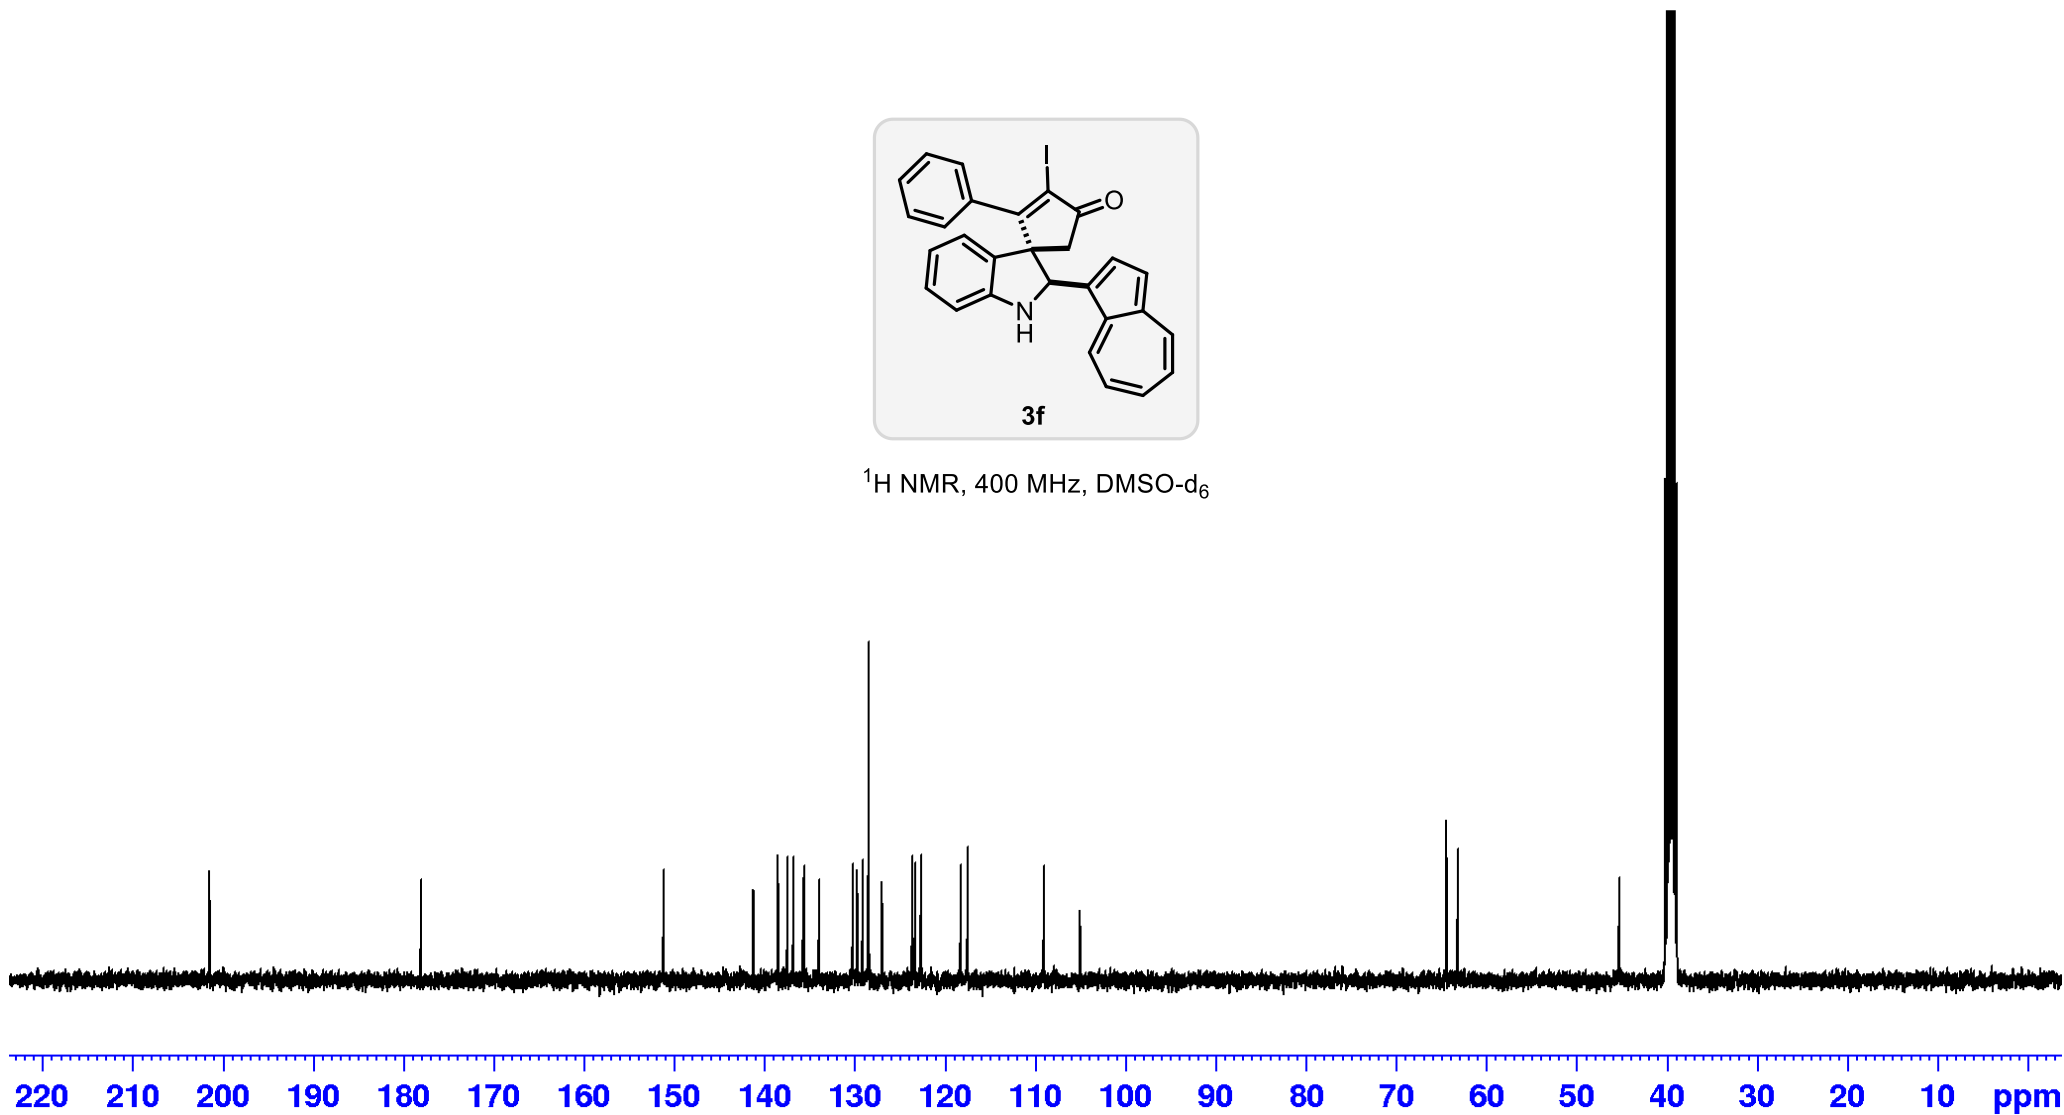

S-92
